# Supplementary material for: Microbiome Assessment of Global Oil Reservoirs Reveals Site-Specific Hydrocarbon Degradation Functional Profiles
Source: Preprints.org preprint supplement (doi:10.20944/preprints202108.0092.v1), 2021-08-03
Supplement: Supplementary file 1 [file Supplementary Table5.xlsx]

## Sheet: Table S5
Supplementary Table 5. Edited Tspex comparison matrix. It was calculated the differences between SPM from oil fields' MAGs and from famlies of GTDB. Negatives values means no enrichment. Positive values means enrichment of the orthogroups in each family from oil field MAGs compared with families genomes from the GTDB. Value 1 completely enrichment orthogrup
Orthogroup	halomonadaceae	kosmotogaceae	lactobacillaceae	methanobacteriaceae	methanococcaceae	methanoregulaceae	methanosarcinaceae	methanotrichaceae	moraxellaceae	nitrincolaceae	anaerolineaceae	oleiphilaceae	petrotogaceae	rhodocyclaceae	smithellaceae	sulfurimonadaceae	sulfurospirillaceae	syntrophorhabdaceae	thermococcaceae	thermotogaceae	anoxybacillaceae	thermovirgaceae	tissierellaceae	archaeoglocaceae	arcobacteraceae	bipolaricaulaceae	burkholderiaceae	dysgonomonadaceae	fervidobacteriaceae	alteromonadaceae
OG0000004	-0.1691	0.0995	0.0895	0.2586	0	-0.1691	-0.2387	0.2188	-0.1989	-0.1989	0.179	-0.0995	0.0895	0.2984	0.2089	-0.0697	0.0298	0.1492	0.0896	0.0796	-0.0995	0.1492	-0.1294	0.1094	-0.1194	0.1294	-0.3183	-0.1393	-0.0398	0.0697
OG0000010	-0.179	0.0964	-0.1102	0.2066	0.0413	-0.1239	0.2203	0.2203	-0.179	0.2341	0.1928	-0.1101	0.0276	0.0688	0.1791	0.0276	-0.1377	0.1928	0.0964	0.0964	0.0276	0.2066	-0.0138	-0.0137	0.1515	0.0827	-0.482	0.0689	0	0.0551
OG0000011	-0.2021	0.1482	0.0673	0.2425	-0.0135	-0.1482	0.1886	0.2695	0.1347	0.2425	0.1347	-0.1078	0.0135	0.1886	0.2021	-0.1078	-0.0135	-0.1348	0.0808	0.0404	-0.0808	0.1887	-0.1213	0.1752	-0.1617	0.1347	-0.4716	-0.1213	-0.0405	-0.1617
OG0000012	0.2118	0.1361	-0.0454	0.2724	0.0151	0.0907	-0.227	0.2421	-0.1816	-0.1513	0.1967	0.0756	0.1059	0.0757	-0.1664	-0.0454	0.0605	0.0605	0.121	0.1211	-0.0908	0.2421	0	0.0907	0	-0.0152	-0.4236	-0.1362	0.0454	-0.0454
OG0000015	-0.1308	0.0981	0	0.2288	0	-0.1471	-0.2288	0.2779	-0.1798	0.2451	0.2288	-0.1144	0	0.0817	0.0817	-0.0654	-0.1307	0.1471	0.1307	0.1144	-0.0818	0.1961	-0.1307	0.049	-0.0327	-0.0817	-0.4249	0.0981	-0.0164	0.0491
OG0000016	0.1874	0.1362	-0.034	0.2044	0	-0.1533	0.2214	0.2895	-0.1873	0.2555	0.2725	-0.1533	-0.0682	0.0851	0.0851	0.0511	-0.1362	0.0851	0.0511	0.0511	0.017	0.2043	0.017	0.1022	-0.0852	-0.0341	-0.3406	0.1022	0.0511	-0.0171
OG0000017	0.2269	0.0349	0.1047	0.2094	0	0.0698	-0.192	0.2793	0.1047	-0.2618	0.192	-0.1571	0.0349	0.0872	0.1222	-0.0175	-0.1396	0.1396	0.0872	0.0873	0.0174	0.1745	-0.0174	0.2269	0.0174	-0.0349	-0.384	0.1047	0.0524	0.0523
OG0000020	0.0546	0.0546	0	0.2003	-0.0364	0.1456	-0.2367	0.3277	0.1274	0.0546	0.2549	-0.0364	0	0.0728	-0.1639	-0.0182	0.0182	0.0364	-0.0182	0.1092	0.0364	0.2731	-0.091	0.1821	-0.1274	0.0182	-0.4552	-0.1456	0.0364	0
OG0000021	0.1689	0.1314	-0.0376	0.2065	0	-0.0376	0.2253	0.244	0.0939	-0.1314	0.2065	0.0376	-0.0376	0.0751	-0.0188	-0.0188	0.0938	0.1877	0.0938	0.1502	0.0751	0.169	0.0188	0.1877	0.0376	0.0564	-0.5068	0.0564	0.0376	0
OG0000027	-0.0404	0.0808	-0.0202	0.2019	0	0.101	-0.1817	0.2625	-0.1212	-0.0404	0.2423	0.0606	0.0202	0.0808	-0.2019	0.0202	0	0.0202	0.0404	0.1212	-0.0808	0.2019	0.1212	0.2221	0.0404	0.0404	-0.5453	-0.101	0.0404	0.0202
OG0000029	0.0817	0.1633	0.0612	0.1633	0	0.1429	0.2041	0.2654	-0.1633	0.0204	0.1837	-0.0204	-0.0612	-0.2041	0.1021	-0.0204	-0.0408	-0.1837	0.0408	0.0409	-0.1225	0.2041	-0.0408	0.2041	-0.0817	0.0817	-0.5307	-0.1429	0.0408	0.0204
OG0000030	0.1665	0.1249	-0.0624	0.2081	0	-0.0208	0.2081	0.3538	-0.1665	-0.1457	0.2289	-0.1041	-0.0208	0.1457	0.2081	-0.0624	-0.1249	0.0417	0.1249	0.0417	-0.1249	0.2081	0.1249	0.0417	0.0416	0	-0.4578	-0.1457	-0.0416	-0.0625
OG0000034	0.1572	0.1797	-0.0225	0.2471	0	-0.0224	0.2022	0.4043	0.1123	-0.0898	0.2021	-0.0674	-0.0449	0.1123	-0.1123	-0.0225	-0.0225	0.0899	0.0449	0.1347	0.0673	0.1572	0.0898	0.1797	-0.0673	0.0898	0.4492	0.0898	0.0449	0.1123
OG0000035	0.0235	0.1412	-0.0236	0.2117	0	-0.0706	0.2117	0.3764	0.0235	-0.1882	0.2117	-0.1647	0.0471	0.1177	0.1177	-0.0706	0.0706	0.047	0.0471	0.1412	-0.0706	0.2118	-0.0941	0.1412	0.0706	0	-0.3293	0.0941	0	0.0941
OG0000036	-0.1152	0.0922	-0.0691	-0.1152	0	-0.1614	0.2075	0.3227	0.0692	-0.0461	0.2074	0.0922	0.0461	0.1153	0.0461	-0.1153	0.0691	-0.1383	0	0.1152	0.1153	0.2075	0.0922	0.1844	0.0691	0.0922	-0.5071	0.0922	0	0
OG0000037	-0.0701	0.1403	-0.0701	0.2104	0	0	0.2104	0.2339	-0.0701	-0.1403	0.187	-0.0935	-0.0467	0.0234	0.1871	0	-0.0233	0.1403	0	0.1169	0.0701	0.2572	-0.1403	0.1403	-0.0233	0.0467	-0.5144	-0.0935	0.0467	-0.0467
OG0000038	0.0234	0.1403	-0.0701	0.2104	0	-0.0467	-0.2104	0.3039	-0.1169	-0.2338	0.2338	0.1403	0.0467	0.0702	0.1871	-0.0467	0.0701	0.0701	0.0467	0.1169	0.1169	0.2104	0.0233	0.1403	0.0701	-0.0935	0.491	-0.0467	0.0467	-0.0467
OG0000040	-0.1194	0.1194	-0.1194	0.2627	0	0.0477	-0.215	0.2866	-0.1672	-0.2388	0.2388	0.0477	0.0478	0.0239	0.1911	0.0478	0.0239	0.1194	0	0.1194	0.0239	0.2627	-0.0239	0.1433	-0.0239	0.0477	-0.406	-0.0955	0.0955	0.0477
OG0000042	-0.0716	0.1672	0.0478	0.2627	0	0	-0.215	0.2388	0.0477	0.215	0.2388	0	0	0.0239	0.0477	0.0478	-0.0239	0.0716	0.0477	0.1194	-0.0716	0.2627	-0.0716	-0.2388	0.0239	-0.0477	-0.5016	0.0955	0.0716	0.1433
OG0000047	0.0541	0.1353	0	0.2166	0	-0.1083	0.2166	0.2978	-0.0541	0.1895	0.0813	-0.1083	0	0.1624	-0.2166	0	-0.1354	0.0271	0.0541	0.0812	-0.0812	0.2166	-0.027	0.0813	0.027	0.1354	-0.379	-0.1083	0.1354	0.0812
OG0000048	-0.0532	0.133	0.0532	0.2128	-0.0532	-0.1064	0.2128	0.2926	0.1596	0.0266	0.1862	-0.0532	0	0	-0.0266	-0.0532	-0.133	0.0266	0.0532	0.133	-0.0798	0.2128	-0.0798	0.1862	-0.0266	-0.0798	-0.4789	-0.1596	0.133	0.0266
OG0000050	0.1641	0.1367	0.0547	0.2188	-0.1094	-0.1094	0.2188	0.3008	-0.1094	-0.1915	0.1915	0	0	0.1094	0.0274	0	-0.1367	-0.1914	0.0547	0.1368	-0.0821	0.2188	-0.0273	0.1367	-0.0273	0.1367	-0.3282	-0.1641	0.0821	-0.0273
OG0000061	0	0.1214	0.0607	0.2731	-0.0304	0.1517	-0.2428	0.3642	-0.0303	-0.1821	0.2125	0.0911	0	0.0607	-0.091	-0.0607	0	0.1214	0.0911	0.1214	0	0.1821	0.0607	0.1821	0	0.0303	0.3034	-0.0303	0.0911	0.0303
OG0000062	0.1203	0.1805	-0.0601	0.2106	0.0301	-0.0902	-0.2407	0.3008	-0.0902	-0.1805	0.1504	0.03	0	0	-0.0902	-0.0601	0	0.1203	0.0902	0.1203	0.0601	0.2707	-0.0601	0.2407	0	0.03	-0.361	0.1504	-0.03	0.0902
OG0000063	-0.1785	0.1785	-0.0595	0.2083	0.0298	-0.0893	-0.238	0.2975	0.1487	-0.0595	0.2083	-0.0893	0	0.119	0.1785	0.119	0.0595	0.1785	0.0297	0.0595	0.0595	0.2678	0.0595	0.0595	0	-0.0297	-0.4165	-0.0893	0.0297	0.0297
OG0000064	0.1514	0.0605	-0.0606	0.2726	0.0303	0.0909	0.0908	0.3029	-0.0909	0	0.2726	-0.0303	-0.0606	-0.1211	-0.1211	0	0.0606	-0.1211	0.1514	0.1211	0	0.2726	0.0606	0.1817	0.0606	-0.0303	-0.424	-0.0303	0.0303	0.0303
OG0000065	0.0909	0.1211	0	0.212	0.0303	0.0303	0.212	0.3635	0.0303	-0.1211	0.2726	-0.0909	0	-0.1817	-0.1211	0	0.0606	0.0606	0.0909	0.1211	0	0.212	0	0.1211	0.0606	-0.0303	-0.424	0.0909	0.0909	0.0303
OG0000066	0.0316	0.1896	0	0.2213	0.0316	-0.0316	0.2212	0.3161	0.0316	-0.2529	0.2845	-0.0316	0.0632	-0.0632	0.0632	-0.0632	0	0	0.0316	0.1264	0.0632	0.2213	0	0.0632	-0.0632	-0.158	-0.2845	-0.0948	0.0316	-0.0316
OG0000067	0.0311	0.1869	0	0.2803	0.0312	0.0935	0.218	0.3114	0.0311	-0.2491	0.1557	0.0935	0.0623	-0.0934	0	0.1246	0.0623	0.0623	0.1557	0.1246	0	0.2803	0	0.1246	0	0.0623	-0.3426	0.0311	0.0311	-0.0311
OG0000069	-0.097	0.1293	0.0647	0.1616	0.0324	-0.0323	0.2263	0.3232	-0.097	0.0323	0.0646	0.0323	-0.0647	0.1617	0.0646	-0.0647	0.0647	0	0.0323	0.1293	0.0647	0.291	0.0647	0.2586	0	0	-0.3556	-0.0323	0.097	0.0323
OG0000070	-0.0968	0.1291	-0.0645	0.2259	0.0322	0.0323	0.2259	0.2905	-0.0968	-0.0969	0.1936	0.0323	0	0.0323	0	-0.0645	0.0645	0.0646	0.0968	0.0646	0	0.2904	0.0645	0.1936	0	-0.0645	-0.4196	0.0323	-0.0968	-0.0323
OG0000073	0.1661	0.1329	0	0.2326	0.0332	0.0333	-0.1661	0.2325	-0.1661	0.0332	0.1994	0.0333	0	0.2326	-0.0665	0.0665	0	-0.0333	0.0997	0.1329	0	0.299	0.0665	0.1329	0	0.0665	-0.2658	0.0997	0.1661	0.0997
OG0000074	0.0968	0.0646	0	0.2905	-0.0322	-0.0323	0.0323	0.355	-0.1614	0.0969	0.1936	-0.0968	-0.0645	0.0969	-0.1291	0	0.0645	0.0323	0.0968	0.0646	0.0645	0.2904	0	0.1936	0	0.0645	0.3873	0.0323	0.0968	0.0968
OG0000076	-0.0321	-0.1923	-0.0641	0.2885	-0.032	0.0321	-0.2244	0.3526	-0.1603	0.1603	0.1283	-0.0961	0	0.1603	-0.0641	0	0.0641	0.0321	0.0321	0.1282	0.0641	0.2244	-0.0641	0.1923	0	-0.0641	0.3847	-0.0321	0.0641	-0.0321
OG0000077	0.0333	0.1333	0	0.2332	-0.0333	0.0333	-0.2332	0.2999	-0.1666	0.2332	0.2665	-0.0333	-0.0666	0.1	-0.1333	0	-0.0666	0.1	0.1	0.1333	-0.0666	0.2332	0.1333	0.1999	0	0.0666	-0.0666	-0.0333	0.0666	-0.0333
OG0000085	0.1689	0.1351	-0.1351	0.2027	-0.0338	-0.1689	0.2027	0.3041	-0.1689	-0.1689	0.2027	-0.0338	-0.0338	0.1013	-0.2027	0	0.0676	0.1013	0.0338	0.0675	0.0676	0.2703	0	0.0337	-0.0676	0.0676	-0.3041	-0.1689	0.0676	0.0676
OG0000088	-0.0333	0.1332	-0.1332	0.2664	0.0333	0	0.1332	0.3663	-0.1665	-0.0333	0.2664	-0.0333	0.0999	0.0999	-0.1998	0.0333	0.0666	0.0999	0.0999	0.1332	-0.0666	0.2664	0	0.1665	-0.0666	0.0666	-0.2997	-0.1665	0.0666	0.1332
OG0000089	0.0344	0.2759	-0.1379	0.2069	0.0345	-0.0689	0.2069	0.3103	-0.0689	0.1034	0.2414	-0.1034	0.0345	-0.1034	0.0344	-0.0345	0	0.0344	0.1034	0.1379	0	0.2758	0.1379	0.1724	0	0	-0.3103	-0.1724	0	0
OG0000090	-0.1035	0.1725	-0.138	0.276	-0.0345	0.138	0.207	0.3795	0.069	0.0345	0.1725	-0.1035	0.0345	-0.0345	-0.0345	0.0345	0	-0.0345	0.1035	0.069	0.069	0.276	0	0.1035	0	0.069	-0.3795	-0.1725	0	0
OG0000092	-0.0354	0.1767	-0.0353	0.2121	-0.0353	0	0.2121	0.3182	0	-0.0353	0.1767	-0.0354	0.0353	0.0707	0.1768	0.0353	-0.0707	0.106	-0.0354	0.1414	0.0707	0.2828	0	0.1767	0	0	-0.3889	-0.1768	0.0707	0
OG0000093	0.1027	0.2395	-0.0342	0.2053	0.0342	-0.0685	0	0.3764	0.0685	-0.2395	0.2395	-0.1027	0.1027	0.1369	0.0343	0.0342	0.0685	0.0343	0.0343	0.0685	0.0685	0.2738	0	0.1711	-0.0685	-0.0685	-0.3764	-0.1711	0.0685	0
OG0000094	-0.0374	0.1868	0.0373	0.2242	0.0373	-0.0747	-0.0748	0.2616	0.0747	-0.2616	0.2616	-0.0374	0.0373	0.0748	0.1869	-0.0373	-0.1495	-0.0374	0.0374	0.1121	0.0747	0.2243	0	0.1868	-0.0747	0	0	-0.1869	0	0
OG0000095	0.1802	0.1081	-0.0361	0.2163	-0.0361	0	0.2162	0.3243	-0.0721	-0.2523	0.1802	-0.1081	0.0361	0.072	0.1081	0.0361	-0.1441	0.1081	-0.036	0.1081	0.0721	0.2883	0	0.1802	0	0.0721	-0.2162	-0.1802	0	0
OG0000096	-0.1061	0.1769	0.0354	0.2122	0.0354	0.0707	0.1415	0.3891	0.0707	0.2123	0.1769	-0.1061	-0.0354	0.0707	0.0353	0.0354	-0.1415	0.1061	0.0353	0.1061	-0.0707	0.3538	0	0.1769	-0.0707	0	-0.283	-0.1769	0.0707	0
OG0000099	-0.1123	0.1872	-0.0374	0.2247	0	0.1498	-0.2247	0.3745	0.0749	0.0749	0.2622	-0.1123	-0.0374	0.1498	0.1123	-0.0374	0.0374	0.0375	0.1123	0.1123	-0.0749	0.2247	0.0749	0.0374	0	0.0749	-0.2247	0.0749	0.0749	0
OG0000100	-0.1092	0.1092	-0.0364	0.2911	0	0.1456	-0.2184	0.2911	0.0728	0.1456	0.182	-0.1092	-0.0364	0.0728	0.1092	0.0364	0.0364	0.1092	0.1092	0.1092	0.0728	0.2911	-0.0728	0.2548	-0.0728	0.1456	-0.2911	0.0728	0.0728	0.0728
OG0000106	0.0735	0.1838	-0.0367	0.2205	0	0	-0.2206	0.2941	0.147	0.147	0.1103	-0.1838	0.0367	0.0735	-0.0368	0.0367	0.0367	0.1102	0.0368	0.1102	0.0735	0.294	-0.0735	0.2573	0	0.0735	-0.3676	0.0735	0.0735	0
OG0000107	-0.073	0.1826	0.0365	0.2191	0	-0.073	-0.2191	0.3652	0.073	0.0731	0.2556	-0.1826	0.0365	0.0731	-0.0365	-0.0365	0.0365	0.0365	0.0365	0.1096	0	0.2921	-0.073	0.1096	-0.1461	0.073	-0.3651	0.073	0	0.073
OG0000111	0	0.1915	0.0383	0.2297	0	0.0766	0.1149	0.3829	0.0766	0.0766	0.1149	0	0.0383	0.1532	0.1149	-0.0383	-0.0383	0.0383	-0.0383	0.1149	-0.0766	0.3063	-0.0766	0.1915	0.0383	0	0.3446	0.0766	0.0766	0.0766
OG0000114	0	0.1949	0.039	0.2339	0	-0.078	0.1169	0.3118	-0.078	0.0779	0.1949	0	0.039	0.0779	-0.039	-0.039	0.117	-0.039	-0.039	0.1169	-0.078	0.3119	-0.078	0.2729	0.039	0.078	-0.1949	0.1559	0.078	0.078
OG0000122	0	0.2008	-0.0401	0.2008	0	-0.0803	0.2008	0.3213	-0.0803	-0.0803	0.1606	-0.0803	0.0401	0.0803	-0.0402	0.0401	-0.0401	0.1204	0.0803	0.1204	-0.0803	0.2811	-0.1606	0.1205	0.0401	0	-0.2811	0.1606	0.0803	-0.0803
OG0000133	-0.0808	-0.0404	-0.0404	0.2019	0	0	-0.1212	0.4039	0.1616	0	0.1615	-0.0808	0.0404	0.0808	-0.2019	-0.0404	0.0404	0.0808	0.1616	0.2019	0.0404	0.2827	0.1212	0.1211	0.1212	0.0404	-0.2423	0.1616	0.0808	0
OG0000134	0	0.2163	-0.0432	0.0433	0	0	0.1298	0.3462	-0.0865	-0.0866	0.1731	0	0.0432	0	0	0.0432	0.0432	0	0.0865	0.2164	-0.0432	0.3029	0.0432	0.0433	0.0432	0.0432	-0.1731	-0.0865	0.0865	0.0865
OG0000135	0.0846	0.1269	0.0423	0.2961	0	0	-0.1269	0.3807	-0.1692	0.1692	0	0.0846	-0.0423	0.0846	0	0.0423	0.0423	0.0846	0.0846	0.1269	0.1269	0.2961	-0.0423	0.2115	0.0423	0.0423	-0.0846	-0.0846	0.0846	0
OG0000136	0	0.2112	0.0422	0.2958	0	0	-0.1267	0.3803	-0.169	0.169	0.169	0.0845	0.1268	0	0.0845	-0.0422	0.0422	0	0.0845	0.1267	0.0422	0.2958	0.0422	0.0845	-0.0422	0.0422	-0.169	-0.0845	0.0845	0
OG0000137	0.0864	0.216	-0.0432	0.216	0	0	0.216	0.3887	-0.1728	-0.0864	0.1728	0.0864	0.0432	0	0.0864	0.0432	0.0432	0	0	0.1296	-0.0432	0.3023	0.0432	0.0864	-0.0432	0.0432	0	0.0864	0	0
OG0000140	-0.0832	0.208	0.0416	0.2912	0	-0.0832	-0.208	0.3743	-0.1664	0.0832	0.2496	0	0.0416	0.0832	0.0832	-0.0416	0.0416	0.1664	0.0832	0.0416	-0.0416	0.2912	-0.0416	0.1664	0.0416	0.0416	-0.0832	-0.0832	0.0832	-0.0832
OG0000144	0	0.2132	0.0427	0.2132	0	0	-0.2132	0.3838	-0.1706	0.0853	0.1706	0	0.0427	0.0853	0	0.0427	-0.0427	0	0	0.128	0.0427	0.2985	0.0427	0.0853	-0.0427	0.0427	-0.2559	0	0.0853	0
OG0000146	0.1614	0.2825	0.0403	0.1211	0	-0.1614	-0.2018	0.3632	-0.1614	0.0807	0.1614	0.0807	0.1211	0	0	-0.0403	-0.0403	0.1614	0.0807	0.2018	0.0403	0.2825	0.0403	0.1614	0.0403	0.0403	-0.3229	0.0807	0.0807	0
OG0000147	-0.0801	0.1602	0.04	0.2804	0	-0.1603	-0.2003	0.3605	-0.1603	0.2404	0.1602	-0.0801	0.04	0.0802	0.0801	-0.04	0.04	0.0801	0.0801	0.1202	0.04	0.2804	-0.04	0.2404	-0.04	0.1202	-0.3205	-0.0801	0.0801	0.0801
OG0000152	0	0.1675	0.0419	0.2094	0	-0.1675	-0.2094	0.377	-0.1675	0.2513	0.2513	0.0838	0.0419	-0.0837	0.0838	-0.0419	-0.0419	0.1675	0.0838	0.1256	0.0419	0.2932	0.0419	0.0837	0.0419	0.0419	-0.1256	-0.0838	0.0838	-0.0838
OG0000153	0.0851	0.1702	0.0425	0.1277	0	-0.1703	-0.2128	0.383	-0.1703	0.2554	0.1702	0	-0.0425	0	0.1703	-0.0425	-0.0425	0.0851	0.0851	0.1277	0.0425	0.2128	0.0425	0.1702	0.0425	0.0425	0.2128	0.0851	0.0851	-0.0851
OG0000154	-0.0855	0.171	0.0427	0.1283	0	0.1283	-0.2138	0.3848	-0.171	0.2565	0.171	0	0.0427	0	0	0.1283	-0.0427	0.0855	0	0.1282	0.0427	0.2993	0.0427	0.171	-0.0427	0.0427	0.1283	0	0.171	0.0855
OG0000155	-0.0858	0.1717	-0.0429	0.2146	0	-0.0429	-0.2146	0.3862	-0.1717	-0.2575	0.1717	-0.0858	0.0429	0	-0.0858	0.0429	0.0429	0.0858	0.0858	0.1288	0.0429	0.3004	0.0429	0.0859	-0.0429	0.1287	0.043	-0.0858	0.0858	-0.0858
OG0000156	-0.0858	0.1717	0.0429	0.1288	0	0.1287	-0.2146	0.3862	-0.1717	-0.2575	0.1717	0	0.0429	0.0859	0	-0.0429	-0.0429	0.1717	0.0858	0.1288	0.0429	0.3004	-0.0429	0.1717	-0.0429	0.0429	-0.043	-0.0858	0.0858	0
OG0000157	-0.0861	0.0862	-0.043	0.2153	0	-0.043	-0.2154	0.3876	-0.1723	-0.2584	0.1723	-0.0861	0.043	0.0862	0	0.043	-0.043	0.0861	0.0861	0.1292	0.043	0.3015	-0.043	0.1723	-0.043	0.043	0.0431	-0.0861	0.0861	-0.0861
OG0000158	0	0.0868	-0.0435	0.2172	0	0.0435	-0.2172	0.304	-0.0435	-0.2606	0.2606	0.0869	0.0435	0.1738	0	0.0435	0.0435	0.0869	0.1737	0.1303	0.0435	0.3041	0.0435	0.0868	-0.0435	0.0435	-0.1303	-0.0869	0.0869	-0.0869
OG0000159	0	0.1741	-0.0435	0.2176	0	0.0435	-0.2176	0.2176	-0.0435	-0.2611	0.2611	-0.0871	-0.0435	-0.0871	0	0.0435	0.0435	0.0871	0.0871	0.1306	-0.0435	0.3047	0.0435	0.1741	0.0435	0.1306	0.2176	-0.0871	0.0871	0
OG0000160	-0.0856	0.0856	-0.0428	0.214	0	0.1284	-0.214	0.3852	0.0428	-0.2568	0.2568	0.0856	-0.0428	-0.1712	0	0.1284	0.0428	0.0856	0.0856	0.1284	0.0428	0.2996	0.0428	0.0856	0.0428	0.1284	-0.0428	-0.0856	0	0
OG0000161	0	0.1741	0.0435	0.2176	0	-0.0435	-0.2176	0.3917	-0.0435	-0.2611	0.1741	0	0.0435	0.0871	-0.0871	0.0435	-0.0435	0	0.0871	0.1306	0.0435	0.3047	-0.0435	0.1741	0.0435	0.0435	-0.0435	-0.0871	0.0871	0
OG0000162	0	0.1712	0.0428	0.214	0	0.0428	-0.214	0.3852	0.1284	-0.2568	0.1712	-0.0856	0.0428	-0.0856	0	0.0428	-0.0428	0.0856	0	0.1284	0.0428	0.2996	-0.0428	0.2568	-0.0428	0.0428	-0.1284	-0.0856	0.0856	0
OG0000163	0	0.169	-0.0422	0.2112	0	0.1268	-0.2113	0.3803	-0.0422	-0.2535	0.0845	0.169	-0.0422	-0.2535	-0.0845	0.0422	0.0422	0.0845	0.0845	0.1267	0.0422	0.2958	0.1268	0	0.0422	0.0422	-0.1268	-0.0845	0.0845	0.169
OG0000164	0	0.1764	0.0441	0.2205	0	0.0441	-0.0882	0.397	-0.0441	-0.2646	0.1764	0	0.0441	0.1323	0.1764	0.0441	0.0441	-0.0882	0.0882	0.1323	0.0441	0.3088	0.0441	0.0882	0.0441	-0.0441	-0.1323	0	0.0882	0
OG0000165	0	0.1782	0.0446	0.3118	0	0.1336	0.1782	0.3118	-0.0446	-0.2673	0.0891	0.0891	-0.0446	0.0445	0.0891	-0.0446	-0.0446	0.0891	0.0891	0.1337	-0.0446	0.3118	-0.0446	-0.0891	0.0446	0.0446	0.0446	-0.0891	0.0891	0
OG0000166	0	0.1831	0.0458	-0.2289	0	-0.0458	0.0916	0.3205	0.0458	0.1373	0.1831	-0.0916	-0.0458	0.1373	-0.0916	0.0458	0.0458	0.0916	0.0916	0.1373	-0.0458	0.2289	0.0458	0.1831	0.0458	0.0458	-0.1373	-0.1831	0.0916	0
OG0000167	0.0907	0.1814	0.0453	0.2722	0	-0.0453	0.0907	0.4082	0.0453	-0.0454	0.1814	0	0.0453	0.136	0	0.0453	0.0453	0.0907	0	0.136	-0.0453	0.3175	0.0453	0.0907	0.0453	0.0453	-0.0453	-0.1814	0	0.0907
OG0000168	-0.0882	0.1764	-0.0441	0.2646	0	0.0441	0.1764	0.397	0.0441	0.1323	0.1764	-0.0882	0.0441	0.1323	-0.0882	0.0441	-0.0441	0.0882	0.0882	0.1323	0.0441	0.3088	0.0441	0.0882	-0.0441	0.0441	-0.2205	-0.1764	0.0882	0
OG0000169	0.0896	0.1793	0.0448	0.2689	0	0.0448	0.1792	0.4033	-0.0448	0.1344	0.0896	0	-0.0448	0.0448	-0.0896	0.0448	0.0448	0	0.0896	0.1344	0.0448	0.3137	0.0448	0.0896	0.0448	0.0448	-0.2241	-0.1792	0	0
OG0000170	0.1782	0.1782	0.0446	0.2673	0	0.0446	0.0891	0.3118	0.0446	0.1337	0	0	-0.0446	0.0445	-0.0891	-0.0446	-0.0446	0	0.1782	0.2227	0.0446	0.2227	0.0446	0.1782	0.0446	0.0446	-0.3118	-0.1782	0.0891	-0.0891
OG0000171	-0.0891	0.1782	0.0446	0.1782	0	-0.0446	0.1782	0.4009	0.0446	0.1337	0	-0.0891	-0.0446	0.1337	0.0891	-0.0446	0.0446	0	0.0891	0.1337	0.0446	0.3118	0.0446	0.0891	0.0446	0.0446	-0.3118	-0.1782	0	0
OG0000172	0	0.1725	0.0431	0.2587	0	-0.0431	0	0.388	-0.0431	0.1294	0.1725	0	-0.0431	0.1294	0	-0.0431	-0.0431	0	0.0862	0.2156	-0.0431	0.388	-0.0431	0.1725	-0.0431	0.0431	-0.3018	-0.1725	0	0
OG0000173	0	0.175	0.0437	0.175	0	0.0437	0.1751	0.3939	0.0437	0.0438	0.0876	-0.0875	-0.0437	0.0438	0	-0.0437	-0.0437	0.1751	0.0875	0.1313	0.0437	0.3064	-0.0437	0.2626	-0.0437	0.0437	-0.3064	-0.1751	0.0875	-0.0875
OG0000174	0	0.1747	0.0437	0.1747	0	0.0437	0	0.3932	0.0437	0.0437	0.1747	-0.0874	0.0437	0.0437	0	0.0437	0.0437	-0.0874	0.0874	0.131	0.0437	0.3058	0.1311	0.2621	0.0437	0.0437	-0.3058	-0.1747	0.0874	-0.1747
OG0000175	0	0.1741	0.0435	0.1741	0	0.1306	0.1741	0.3917	0.1306	0.0436	0.1741	0	0.0435	0.1306	0	0.0435	0.0435	0.0871	0.0871	0.1306	0.0435	0.3047	-0.0435	0.1741	-0.0435	0.0435	-0.3046	-0.1741	0.0871	-0.1741
OG0000176	0	0.178	0.1335	0.178	0	-0.0445	-0.089	0.4005	-0.0445	-0.0445	0.089	0.089	0.0445	0.1335	0.089	-0.0445	-0.0445	0.089	0.178	0.1335	-0.0445	0.3115	-0.0445	0.089	0.0445	0.0445	-0.3115	-0.178	0.089	-0.0445
OG0000177	0	0.1749	0.0438	0.1749	0	0.0438	0.1749	0.3936	0.1312	-0.0437	0.2624	-0.0875	0.0438	0.1312	0	0.0438	-0.0438	0	0.0875	0.1312	0.0438	0.3061	-0.0438	0.1749	-0.0438	0.0438	-0.3061	-0.1749	0.0875	0.0438
OG0000178	0	0.1739	0.0435	0.1739	0	0.1304	0	0.3913	-0.0435	0.0434	0.2609	0	0.0435	0.1304	0	0.0435	-0.0435	0	0.0869	0.1304	-0.0435	0.3913	-0.0435	0.1739	0.0435	0.0435	-0.3043	-0.1739	0.0869	0.0435
OG0000179	0.0868	0	0.0434	0.2604	0	-0.0434	0.1736	0.3906	0.0434	0.1302	0.2604	-0.0868	0.0434	0.1302	-0.0868	-0.0434	-0.0434	-0.0868	0.0868	0.1302	0.0434	0.3038	-0.0434	0.1736	0.0434	-0.0434	-0.3038	-0.1736	0.0868	0.0434
OG0000180	0.0899	0.1798	0.045	0.1798	0	0.045	0	0.4046	-0.045	0.1349	-0.2697	0	-0.045	0.0449	-0.0899	-0.045	-0.045	0	0.0899	0.1349	0.045	0.2247	0.045	-0.0899	-0.045	-0.045	-0.3146	-0.1798	0.0899	0.045
OG0000181	-0.0875	0.0876	0.0437	0.2626	0	0.0437	0	0.3939	0.1313	-0.0438	0.1313	-0.0875	-0.0437	0.1313	-0.0875	-0.0437	-0.0437	0.0875	0.0875	0.1313	-0.0437	0.3939	-0.0437	0.175	0.0437	0.0437	-0.3064	-0.1751	0.0875	-0.0437
OG0000182	0	0.1764	0.0441	0.1764	0	0.0441	0	0.397	0.0441	-0.0441	0.1323	-0.0882	-0.0441	0.0441	0	0.0441	0.0441	0	0	0.1323	0.0441	0.397	-0.0441	0.2646	-0.0441	0.0441	-0.3088	-0.1764	0	0.1323
OG0000183	-0.0887	0.1774	0.0443	0.1774	0	-0.0443	0.1775	0.3993	0.0443	0.1331	0.2218	-0.0887	-0.0443	0.1331	0	0.0443	-0.0443	0	0.0887	0.1331	0.0443	0.3105	-0.0443	0.0888	-0.0443	0.0443	-0.3106	-0.1775	0.0887	0.0443
OG0000184	-0.1764	0.1764	0.0441	0.1764	0	0.0441	0.0882	0.397	0.0441	-0.0441	0.1323	-0.0882	0.0441	0.1323	0.0882	-0.0441	-0.0441	0.0882	0.0882	0.1323	0.1323	0.3088	0.0441	0.1764	-0.0441	-0.0441	-0.3088	-0.1764	0.0882	0.1323
OG0000185	-0.1751	0.175	-0.0437	0.175	0	0.1313	0	0.3939	0.1313	-0.0438	0.2188	-0.1751	-0.0437	0.0438	0	-0.0437	-0.0437	0	0.0875	0.1313	0.0437	0.3064	-0.0437	0.175	-0.0437	0.0437	-0.3064	-0.1751	0.0875	0.1313
OG0000186	-0.1731	0.1731	-0.0432	0.2596	0	0.0432	0	0.3894	0.0432	0.2164	0.1298	-0.1731	0.0432	0.1298	-0.0865	-0.0432	-0.0432	0	0.0865	0.1298	0.0432	0.3029	0.0432	0.1731	-0.0432	0.1298	-0.3029	-0.1731	0.0865	0.0432
OG0000187	-0.1752	0.2629	0.0438	0.1753	0	0.0438	0.1752	0.3943	0.0438	-0.0438	0.1314	-0.1752	-0.0438	0.0438	0.0876	0.0438	-0.1314	0.0876	0	0.1314	0.0438	0.2629	0.0438	0.2629	0.0438	-0.0438	-0.3067	-0.1752	0.0876	-0.0438
OG0000188	-0.178	0.178	0.0445	0.178	0	0.1335	-0.089	0.4005	-0.0445	0.1335	0.1335	-0.178	0.0445	0.1335	0.089	0.0445	-0.1335	0	0.089	0.1335	-0.0445	0.267	0.1335	0.089	-0.0445	0.0445	-0.3115	-0.178	0.089	-0.0445
OG0000189	-0.1826	0.1826	0.1369	0.1826	0	0.0457	0.0913	0.4108	0.0457	0.137	0.2282	-0.1826	-0.0457	0.0456	0	-0.0457	-0.1369	0	0.0913	0.137	0.0457	0.2739	0.0457	0.1826	-0.0457	0.0457	-0.0913	-0.1826	0.0913	-0.0457
OG0000190	-0.1853	0.1853	0.0463	0.1853	0	0.0463	0	0.4169	0.0463	0.139	0.139	-0.1853	-0.0463	-0.0464	0	-0.0463	-0.139	0.0927	0	0.139	-0.0463	0.278	-0.0463	0.1853	0.0463	0.0463	-0.0927	-0.1853	0.0927	-0.0463
OG0000191	-0.0463	0.0928	0.0463	0.0928	0	-0.0463	0.1855	0.4173	0.0463	-0.0464	0.1391	-0.1855	-0.0463	0.1391	0.0927	0.0463	-0.1391	0.0927	0.0927	0.1391	-0.0463	0.2782	0.0463	0.2782	0.0463	-0.0463	0.0928	-0.1855	0.0927	0.0463
OG0000192	0.047	0.0939	-0.047	0.1879	0	0.141	0.094	0.4228	-0.047	-0.047	0.1409	-0.1879	-0.047	0.1409	0	-0.047	-0.141	0.094	0	0.1409	-0.047	0.2819	0.047	0.1879	0.047	0.047	0	-0.1879	0.094	0.047
OG0000193	0.0461	0.1843	-0.0461	0.1843	0	0.0461	0.1843	0.4147	0.1382	-0.046	0.1382	-0.1843	0.0461	0.1382	0.0921	0.0461	-0.1382	-0.0921	0.0921	0.1382	-0.0461	0.2764	0.0461	0.1843	0.0461	-0.0461	0.0921	-0.1843	0.0921	-0.0461
OG0000194	-0.0464	0.1859	-0.0464	0.1859	0	-0.0464	-0.0929	0.4182	0.1394	0.1394	0.1394	-0.1859	-0.0464	0.0465	0	-0.0464	-0.1394	0.1859	0.0929	0.1394	-0.0464	0.2788	-0.0464	0.093	0.0464	0.0464	-0.093	-0.1859	0.0929	0.0464
OG0000195	0.0461	0.1843	-0.0461	0.1843	0	0.0461	0.1843	0.4147	-0.0461	-0.046	0.1382	-0.1843	-0.0461	0.1382	-0.0921	-0.0461	-0.1382	0.0921	0.0921	0.1382	-0.0461	0.2764	0.0461	0.1843	0.0461	0.1382	0.0921	-0.1843	0.0921	0.0461
OG0000196	0.1354	0.1805	-0.0452	0.1805	0	0.1354	0	0.4062	0.0452	0.2256	0.2256	-0.1805	-0.0452	0.1354	0	-0.0452	-0.1354	0.1805	0.0903	0.1354	0.0452	0.2708	-0.0452	0.1805	-0.0452	0.0452	0.0902	-0.1805	0.0903	-0.0452
OG0000197	-0.0462	0.1847	-0.0462	0.1847	0	0.0462	0.0923	0.4156	-0.0462	0.2309	0.0461	-0.1847	0.0462	0.1385	-0.0923	-0.0462	-0.1385	-0.0923	0.0923	0.1385	0.0462	0.277	-0.0462	0.1847	0.0462	0.0462	-0.0923	-0.1847	0.0923	-0.0462
OG0000198	-0.047	0.1879	0.047	0.2819	0	0.047	0.094	0.4228	0.141	-0.047	0.1409	-0.1879	-0.047	0.047	0.1879	-0.047	0	0	0.094	0.1409	0.047	0.2819	0.047	0.0939	0.047	-0.047	-0.0939	0.141	0	0.047
OG0000199	-0.0476	0.1905	0.0476	0.1905	0	-0.0476	0	0.4286	-0.0476	-0.0477	0.1429	-0.1905	0.0476	0.1429	0.0953	-0.0476	0	0	0.0953	0.1429	0.0476	0.2857	-0.0476	0.1905	0.0476	0.0476	-0.0953	0.1429	0	0.0476
OG0000200	0.0467	0.1867	0.0467	0.1867	0	-0.0467	0.1867	0.4201	0.14	-0.0466	0.14	-0.1867	0.0467	0.14	0.0933	-0.0467	0	0.0933	0.0933	0.14	0.0467	0.28	0.0467	0.1867	-0.0467	-0.0467	-0.0933	0.14	0	0.14
OG0000201	0.0469	0.1875	-0.0469	0.1875	0	0.0469	-0.0937	0.3281	0.0469	0.2344	0.1406	-0.1875	0.0469	0.1406	-0.0937	0.0469	0	0.0937	-0.0937	0.1406	0.0469	0.2813	0.0469	0.1875	0.0469	0.0469	0.2813	0.0469	0.0937	0.0469
OG0000202	0.0467	0.1865	0.0467	0.1865	0	0.0467	0.1865	0.4197	-0.0467	0.2331	0.2331	-0.0467	-0.0467	0.1399	0	0.0467	0	0	0.1865	0.1399	0.0467	0.2798	0.0467	0.0932	0.0467	0.0467	0.1865	0.0467	0.0933	-0.0467
OG0000203	0.0492	0.197	-0.0492	0.197	0	-0.0492	0	0.3449	-0.0492	0.0493	0.1478	-0.0492	-0.0492	0.1478	-0.0985	-0.0492	0	-0.0985	0.0985	0.1478	-0.0492	0.2956	0.0492	0.197	0.0492	0.0492	0	0.0492	0.0985	-0.0492
OG0000204	-0.0478	0.1911	-0.0478	0.2867	0	0.0478	0.1911	0.43	-0.0478	0.0477	0.1433	-0.0478	0.0478	0.0477	0.1911	0.0478	0	0	0.0955	0.1433	0.0478	0.1911	0.0478	0.1911	0.0478	0.0478	0.0955	0.0478	0.0955	-0.0478
OG0000205	-0.0479	0.1916	-0.0479	0.2873	0	-0.0479	-0.0958	0.431	-0.0479	-0.0479	0.2395	0.0479	-0.0479	0.0479	-0.0958	-0.0479	0	0	0.0958	0.1437	0.0479	0.2873	0.0479	0.0958	0.0479	0.0479	0	-0.0479	0.0958	-0.0479
OG0000206	0.0492	0.1966	-0.0492	0.0983	0	-0.0492	0	0.4424	-0.0492	-0.0491	0.1475	0.0492	-0.0492	0.1475	-0.0983	-0.0492	0	0	0.0983	0.1475	0.0492	0.2949	0.0492	0	0.0492	0.0492	0.0983	0.0492	0.0983	0.0492
OG0000207	0.0475	0.1902	-0.0475	0.0952	0	0.0475	0.1903	0.4281	0.0475	0.1427	0.1427	-0.0475	-0.0475	0.0476	-0.0951	-0.0475	0	-0.0951	0.0951	0.1427	-0.0475	0.2854	0.0475	0.0952	0.0475	0.0475	0.2854	0.0475	0.0951	0.0475
OG0000208	0.0494	0.1975	0.0494	0.1975	0	-0.0494	0.0988	0.3457	0.0494	-0.0494	0.1481	0.0494	-0.0494	0.1481	0	0.1482	0	-0.0988	0	0.1481	0.0494	0.2963	-0.0494	0.0987	0.0494	0.0494	-0.0987	0.0494	0.0988	0.0494
OG0000209	-0.048	0.192	0.048	0.096	0	0.048	-0.096	0.432	0.144	0.048	0.144	0.048	-0.048	0.144	0.192	-0.048	0	0	0.096	0.144	-0.048	0.288	0.048	0.192	-0.048	0.048	-0.096	-0.048	0.096	0.048
OG0000210	-0.0481	0.1925	-0.0481	0.1925	0	-0.0481	0.1925	0.433	0.0481	-0.0481	0.1444	0.0481	-0.0481	0.1444	0	0.0481	0	-0.0962	0.0962	0.1444	0.0481	0.2887	0.0481	0	-0.0481	0.1443	-0.0963	-0.0481	0.0962	0.0481
OG0000211	-0.0473	0.189	-0.0473	0.189	0	-0.0473	0.189	0.4253	-0.0473	0.1418	0.1418	0.0473	-0.0473	0.1418	-0.0945	-0.0473	0	-0.189	0.0945	0.1418	0.0473	0.2835	0.0473	0.189	0.0473	0.0473	-0.0945	0.0473	0.0945	0.0473
OG0000212	0.0482	0.1929	-0.0482	0.1929	0	-0.0482	0	0.434	0.0482	0.1447	0.1447	0.0482	-0.0482	0.0483	-0.0965	-0.0482	0	-0.1929	0.0965	0.1447	-0.0482	0.2894	-0.0482	0.0965	0.0482	0.0482	-0.0965	0.0482	0.0965	0.0482
OG0000213	0.0463	0.1849	-0.0463	0.2774	0	-0.0463	-0.0925	0.4161	0.1387	0.2311	0.1387	0.0463	-0.0463	0.1387	0	-0.0463	0	-0.1849	0.0925	0.1387	0.0463	0.2774	0.0463	0.1849	-0.0463	-0.0463	0.1849	0.0463	0.0925	0.0463
OG0000214	-0.0484	0.1934	-0.0484	0.1934	0	-0.0484	0	0.4351	0.0484	-0.0483	0.145	-0.0484	-0.0484	0.0483	0	-0.0484	0	-0.1933	0	0.0483	0.0484	0.2901	-0.0484	0.1934	0.0484	-0.0484	-0.0966	0.145	0.0967	0.0484
OG0000215	0.048	0.192	-0.048	0.288	0	0.048	0	0.336	0.144	-0.048	0.048	-0.048	-0.144	0.048	-0.096	-0.048	0	-0.192	0	0.144	-0.048	0.288	0.144	0.192	-0.048	0.048	0.096	0.144	0	0.048
OG0000216	0.1422	0.1896	-0.0474	0.1896	0	0.0474	0	0.4266	0.0474	0.0474	0.1422	0.0474	-0.1422	0.1422	-0.0948	-0.0474	0	0.0474	0.0948	0.1422	0.0474	0.2844	0.1422	0.1896	-0.0474	-0.0474	0.1896	0.1422	0	-0.0474
OG0000217	0.1435	0.1914	-0.0479	0.287	0	-0.0479	0	0.4306	-0.0479	-0.0478	0.0478	0.0479	-0.1435	-0.0478	-0.0957	-0.0479	0	0.0479	0.0957	0.1435	0.0479	0.2871	0.0479	0.1914	-0.0479	0.0479	0	0.1435	0.0957	0.0479
OG0000218	0.0465	0.1863	-0.0465	0.2794	0	0.0465	0.1863	0.4191	0.0465	0.0466	0.1397	0.0465	-0.1397	0.1397	-0.0931	-0.0465	0	0.1397	0.0931	0.1397	-0.0465	0.2794	0.0465	0.1863	-0.0465	0.1397	-0.1863	-0.0465	0.0931	0.0465
OG0000219	0.0479	0.1916	-0.0479	0.2873	0	0.0479	0	0.3352	0.1437	0.1437	0.1437	0.1437	0	0.1437	0	-0.0479	0	0.0479	0.0958	0.2395	0.0479	0.2873	-0.0479	0.0958	0.1437	0.1437	-0.0958	0.0479	0.0958	0.0479
OG0000220	-0.0478	0.1911	0.0478	0.1911	0	0.0478	-0.0955	0.43	-0.0478	0.1433	0.2389	-0.0478	0	0.1433	-0.0955	-0.0478	0	0.0478	0	0.1433	0.0478	0.2867	0.0478	0.1911	-0.0478	0.0478	-0.0955	0.1433	0.0955	0.0478
OG0000221	0.0475	0.1902	-0.0475	0.1902	0	-0.0475	-0.0951	0.5232	0.0475	-0.0476	0.1427	-0.0475	0	0.0476	0	-0.1427	0	0.0475	0.0951	0.1427	0.0475	0.2854	0.0475	0.1902	-0.0475	-0.0475	0.0952	0.0475	0.0951	-0.0475
OG0000222	0.0481	0.1925	-0.0481	0.1925	0	-0.0481	0	0.433	0.0481	0.1444	0.1444	-0.0481	0	0.1444	0.0962	-0.1443	0	0.1443	0.0962	0.1444	-0.0481	0.2887	-0.0481	0.1925	0.0481	-0.0481	-0.0963	0.0481	0	-0.0481
OG0000223	-0.0484	0.1936	-0.0484	0.2904	0	-0.0484	-0.0968	0.4355	-0.0484	-0.0484	0.1452	-0.0484	0	0.1452	0.0968	0	0	0.0484	0.0968	0.1452	0.0484	0.2904	-0.0484	0.1936	-0.0484	-0.0484	0	-0.0484	0	-0.0484
OG0000224	0.0483	0.1931	-0.0483	0.1931	0	-0.0483	0	0.4345	0.0483	0.2414	0.1448	-0.0483	0	0.1448	-0.0965	0	0	0.0483	0	0.1448	-0.0483	0.2897	-0.0483	0.1931	-0.0483	-0.0483	-0.0965	-0.0483	0.0965	0.0483
OG0000225	0.0488	-0.0977	-0.0488	0.1954	0	-0.0488	0	0.4396	0.0488	0.2443	0.1465	-0.0488	0	0.1465	0	0	0	0.0488	0	0.1465	0.0488	0.2931	0.0488	0.0977	-0.0488	-0.0488	-0.0977	-0.0488	0.0977	0.1466
OG0000226	0.0486	0.0973	-0.1459	0.1945	0	-0.0486	-0.0973	0.4376	-0.0486	-0.0487	0.1459	0.0486	0	0.1459	-0.0973	0	0	0.1459	0.0973	0.1459	0.0486	0.2918	0.0486	0.1945	0.1459	-0.0486	0	0.0486	0	-0.0486
OG0000227	0.0497	0.0994	-0.1491	0.1988	0	-0.0497	-0.0994	0.3478	0.0497	0.0497	0.1491	0.0497	0	0.1491	0.1988	0	0	0.1491	0.0994	0.1491	0.0497	0.2981	-0.0497	0.0994	0.0497	0.0497	-0.0994	0.0497	0	0.0497
OG0000228	-0.0485	0.194	-0.1455	0.194	0	0.0485	-0.097	0.4366	-0.0485	0.1455	0.1455	-0.0485	0	0.0485	-0.097	0	0	0.1455	0.097	0.0485	0.0485	0.291	-0.0485	0.194	-0.0485	-0.0485	-0.097	0.0485	0.097	0.0485
OG0000229	-0.0489	0.098	-0.1469	0.1959	0	-0.0489	0	0.4407	0.1469	-0.049	0.1469	-0.0489	0	0.049	-0.0979	0	0	-0.0489	0.0979	0.1469	0.0489	0.2938	0.0489	0.1959	-0.0489	-0.0489	-0.098	0.0489	0.0979	0.0489
OG0000230	-0.0471	0.0942	-0.1413	0.1883	0	-0.0471	-0.0942	0.4238	0.0471	0.0471	0.2354	0.0471	0	0.1413	-0.0942	0	0	0.0471	0.0942	0.1413	0.0471	0.3767	-0.0471	0.1883	-0.0471	-0.0471	-0.1883	0.1413	0.0942	0.0471
OG0000231	-0.0481	0.1926	-0.1445	0.1926	0	-0.0481	-0.1927	0.4335	-0.0481	-0.0482	0.1445	0.0481	0	0.1445	-0.0963	0	0	-0.0481	0.0963	0.1445	0.0481	0.289	-0.0481	0.1926	-0.0481	-0.0481	-0.0964	0.0481	0.0963	-0.0481
OG0000232	-0.0479	0.1914	-0.1435	0.1914	0	-0.0479	-0.1913	0.4306	-0.0479	-0.0478	0.1435	0.0479	0	0.1435	-0.1913	0	0	-0.0479	0.0957	0.1435	0.0479	0.2871	-0.0479	0.1914	-0.0479	-0.0479	-0.0956	-0.0479	0.0957	-0.0479
OG0000233	-0.0478	0.1909	-0.1432	0.1909	0	-0.0478	-0.1909	0.4296	0.0478	0.0477	0.1432	0.1432	0	0.0477	-0.1909	0	0	-0.0478	0.0955	0.1432	0.0478	0.2864	-0.0478	0.1909	0.0478	0.0478	-0.0954	0.1432	0	0.0478
OG0000234	-0.0482	0.1929	-0.1447	0.1929	0	0.0482	-0.1929	0.434	-0.0482	-0.0483	0.1447	-0.0482	0	0.0483	-0.1929	0	0	0.0482	0.0965	0.1447	0.0482	0.2894	0.0482	0.1929	0.0482	0	-0.0965	0.0482	0.0965	-0.0482
OG0000235	-0.0491	0.1961	-0.1471	0.1961	0	0.0491	-0.1961	0.4413	0.0491	0.049	0.1471	-0.0491	0	0.049	-0.1961	0	0	0.0491	0.0981	0.049	0.0491	0.2942	-0.0491	0	0.0491	0	0	0.0491	0.0981	-0.0491
OG0000236	-0.0479	0.0956	-0.1435	0.1914	0	-0.0479	-0.1913	0.4306	-0.0479	-0.0478	0.1435	0.0479	0	0.1435	-0.1913	0	0	0.0479	0.0957	0.0478	0.0479	0.3827	-0.0479	0.1435	-0.0479	0	-0.0956	0.1435	0.0957	0.1435
OG0000237	0.1445	0.1926	-0.1445	0.1926	0	-0.0481	-0.1927	0.4335	-0.0481	0.0482	0.1445	-0.0481	0	0.1445	-0.1927	0	0	0.1445	0.0963	0.1445	0.0481	0.289	0.0481	0.1445	-0.0481	0	-0.0964	0.0481	0	0.0481
OG0000238	0.1478	0.197	-0.1478	0.197	0	-0.0492	-0.1971	0.4434	-0.0492	0.0493	0.1478	-0.0492	0	0.0493	0.0492	0	0	0.0492	0.0985	0.1478	0.0492	0.2956	-0.0492	0.1478	0.0492	0	-0.0986	0.0492	0	0.0492
OG0000239	0.0474	0.1898	-0.1424	0.1898	0	-0.0474	-0.1898	0.4271	0.0474	0.1423	0.1423	0.0474	0	0.1423	-0.0474	0	0	0.0474	0.0949	0.2373	0.0474	0.3797	-0.0474	0.1423	0.0474	0	-0.1898	-0.0474	0	0.0474
OG0000240	0.0484	0.1934	-0.145	0.1934	0	0.0484	-0.1933	0.4351	0.0484	0.2417	0.2417	-0.0484	0	0.0483	-0.0484	0	0	0.0484	0.0967	0.145	0.0484	0.2901	0.0484	0.145	-0.0484	0	-0.0966	0.0484	0	0.0484
OG0000241	0.0484	0.1938	-0.1454	0.1938	0.0969	-0.0484	-0.1938	0.436	-0.0484	-0.0485	0.1453	0.0484	0	0.2423	-0.0484	0	0	0.0484	0	0.1453	0.0484	0.2907	-0.0484	0.1453	-0.0484	0	-0.1938	0.0484	0	0.0484
OG0000242	0.0484	0.1938	-0.1454	0.1938	0	0.1454	-0.1938	0.436	0.0484	-0.0485	0.0485	-0.0484	0.0969	0.1453	0.0484	0	0	0.1454	-0.0969	0.1453	0.0484	0.2907	-0.0484	0.1453	-0.0484	0	-0.1938	-0.0484	0.0969	0.0484
OG0000243	0.05	0.1	-0.15	0.2	0	-0.05	-0.2	0.35	-0.05	-0.05	0.15	0.05	0	0.15	-0.05	0	0	-0.05	0.1	0.15	0.05	0.3	-0.05	0.15	-0.05	0	-0.2	0.15	0	-0.05
OG0000244	0.0497	0.199	-0.1493	0.199	0	0.0497	-0.199	0.3483	-0.0497	0.1492	0.1492	0.0497	0	0.0498	0.0497	0	0	0.0497	0.0995	0.1492	0.0497	0.2985	-0.0497	0.1492	-0.0497	0	-0.199	0.0497	0.0995	0.0497
OG0000245	0.0495	0.198	-0.1485	0.198	0	0.0495	-0.198	0.3466	-0.0495	0.1485	0.1485	0.0495	0	0.1485	0.0495	0	0	0.0495	0.099	0.1485	0.0495	0.2971	-0.0495	0.1485	0.0495	0	0.198	-0.0495	0.099	0.0495
OG0000246	-0.0472	0.1886	-0.1414	0.1886	0	-0.0472	-0.1886	0.4243	-0.0472	-0.0471	0.1415	-0.0472	0	0.1415	0.1414	0	0	0.0472	0	0.1415	0.0472	0.3771	-0.0472	0.1415	-0.0472	0	-0.1886	0.1414	0.1886	0.1414
OG0000247	0.048	0.192	-0.144	0.192	0	-0.048	-0.192	0.432	0.048	-0.048	0.24	0.144	0	0.048	0.048	0	0	0.144	0	0.144	0.048	0.288	-0.048	0.144	-0.048	0	-0.192	-0.048	0.096	0.144
OG0000248	0.0488	0.195	0.0975	0.195	0	0.0488	-0.1949	0.3411	-0.0488	0.1462	0.1462	0.0488	0	0.0487	0.1462	0	0	-0.0488	0.0975	0.1462	0.1462	0.2925	-0.0488	0.1462	-0.0488	0	-0.2924	0.0488	0.0975	0.1462
OG0000249	0.0484	0.1936	0	0.1936	0	0.1452	-0.1936	0.4355	-0.0484	0.1452	0.1452	0.0484	0	0.0484	0.0484	0	0	0.0484	0.0968	0.1452	0.0484	0.2904	-0.0484	0.1452	-0.0484	0	-0.2904	0.0484	0.0968	0.0484
OG0000250	0.0488	0.195	0	0.195	0	0.0488	-0.1949	0.4387	-0.0488	0.0487	0.1462	0.1462	0	0.0487	-0.0488	0	0	0.0488	0.0975	0.0487	0.0488	0.2925	-0.0488	0.1462	-0.0488	0.0975	-0.2924	0.0488	-0.0975	-0.0488
OG0000251	-0.0486	0.1945	0	0.1945	0	0.1459	-0.1945	0.4376	-0.0486	-0.0487	0.1459	0.0486	0	0.1459	0.1459	0	0	0.0486	0	0.1459	0.0486	0.2918	-0.0486	0.0487	-0.0486	0	-0.2917	0.0486	0	-0.0486
OG0000252	-0.0495	0.0989	0	0.1978	0	-0.0495	-0.1978	0.4451	-0.0495	-0.0494	0.1484	0.0495	0	0.0494	-0.0495	0	0	0.0495	0	0.1484	0.0495	0.2967	-0.0495	0.1484	-0.0495	0	-0.2967	0.0495	0	0.0495
OG0000253	0.0481	0.1926	0	0.289	0	-0.0481	-0.1927	0.4335	0.0481	0.1445	0.1445	-0.0481	0	0.1445	-0.0481	0	0	0.0481	0	0.0482	0.0481	0.289	0.0481	0.1445	-0.0481	0	-0.289	0.0481	0.0963	0.0481
OG0000254	0.0495	0.1978	0	0.1978	0	-0.0495	-0.1978	0.3461	-0.0495	0.1484	0.1484	0.0495	0	0.1484	0.0495	0	0	0.0495	0	0.1484	0.0495	0.2967	0.0495	0.1484	-0.0495	0	-0.2967	0.0495	0.0989	0.0495
OG0000255	0.0491	0.1963	0	0.1963	0	0.0491	-0.1964	0.4418	-0.0491	-0.0491	0.0491	0.0491	0	0.0491	-0.0491	0	0	-0.0491	0.0982	0.1473	-0.0491	0.2945	-0.0491	0.1473	-0.0491	0	-0.2945	-0.0491	0.0982	0.0491
OG0000256	0.1473	0.1963	0	0.1963	0	-0.0491	-0.1964	0.3436	-0.0491	0.0491	0.1473	0.0491	0	0.1473	0.0491	0	0	-0.0491	0.0982	0.1473	-0.0491	0.2945	0.0491	0.1473	-0.0491	0	-0.2945	0.1473	0.0982	0.0491
OG0000257	-0.0474	0.1896	0	0.1896	0	-0.0474	-0.1896	0.4266	0.0474	-0.0474	0.1422	-0.0474	0.0948	0.1422	-0.0474	0	0	0.0474	0.1896	0.1422	-0.0474	0.2844	-0.0474	0.237	-0.0474	0	-0.2844	0.0474	0.1896	0.0474
OG0000258	-0.0498	0.1993	0	0.1993	0	0.0498	-0.1993	0.3487	-0.0498	-0.0498	0.0498	0.0498	0	0.1495	-0.0498	0	0	-0.0498	0.0996	0.1495	-0.0498	0.2989	-0.0498	0.1495	-0.0498	0	-0.2989	-0.0498	0.0996	0.0498
OG0000259	0.0484	0.1938	0.0969	0.1938	0	0.0484	-0.1938	0.436	0.0484	0.1453	0.1453	-0.0484	0	0.1453	0.0484	0	0	0.1454	0.0969	0.0969	-0.0484	0.2907	-0.0484	0.1453	0.0484	0	-0.2907	0.0484	0.0969	0.0484
OG0000260	0.0485	0.1942	0	0.1942	0	-0.0485	-0.1943	0.437	0.0485	0.1457	0.1457	0.0485	0	0.1457	0.0485	0	0	0.1457	0.0971	0.0971	0.0485	0.2914	-0.0485	0.1457	-0.0485	0	-0.2914	0.0485	0.0971	0.0485
OG0000261	0.0491	0.1961	0.0981	0.1961	0	0.0491	-0.1961	0.4413	0.0491	0.1471	0.1471	0.0491	0	0.1471	-0.0491	0	0	0.0491	0.0981	0.0981	0.1471	0.1961	-0.0491	-0.049	-0.0491	0	-0.2942	0.1471	0.0981	0.0491
OG0000262	0.0491	0.1961	0.0981	0.1961	0	0.0491	-0.1961	0.4413	-0.0491	-0.049	0.1471	0.0491	0	0.1471	-0.0491	0	0	0.0491	0.0981	0.0981	0.0491	0.2942	-0.0491	-0.049	-0.0491	0	-0.2942	0.1471	0	0.0491
OG0000263	-0.0491	0.098	0.0981	0.1961	0	0.0491	-0.1961	0.4413	-0.0491	-0.049	0.1471	0.0491	0	0.049	0.0491	0	0	0.1471	0.0981	0.0981	0.1471	0.2942	-0.0491	0.1471	-0.0491	0	-0.2942	0.0491	0.0981	0.0491
OG0000264	-0.0473	0.1894	0	0.2841	0	-0.0473	-0.1894	0.4261	0.1421	-0.0474	0.142	0.0473	0	0.142	-0.0473	0	0	0.0473	0.0947	0.0947	0.0473	0.2841	0.0473	0.2368	-0.1421	0	-0.2841	0.1421	0.0947	0.0473
OG0000265	-0.0484	0.1934	0	0.29	0	-0.0484	-0.1933	0.4351	-0.0484	-0.0483	0.145	-0.0484	0	0.145	0.0484	0	0	0.0484	0	0.0967	-0.0484	0.2901	0.0484	0.145	-0.145	0	-0.29	0.0484	0.0967	-0.0484
OG0000266	-0.0495	0.198	0	0.198	0	-0.0495	-0.198	0.3466	-0.0495	-0.0495	0.1485	0.0495	0	0.1485	0.1485	0	0	0.0495	0.099	0.099	0.0495	0.2971	-0.0495	0.1485	-0.1485	0	-0.297	0.0495	0.099	0.0495
OG0000267	0.0491	0.098	0	0.1961	0	0.0491	-0.1961	0.4413	-0.0491	0.1471	0.049	-0.0491	0	0.049	0.0491	0	0	0.0491	-0.0981	0.0981	0.0491	0.2942	-0.0491	0.1471	-0.1471	0	-0.2942	0.1471	0	0.1471
OG0000268	0.0507	0.2028	0	0.2028	0	0.0507	-0.2028	0.4563	-0.0507	-0.0507	-0.0507	-0.0507	0	0.0507	0.0507	0	0	-0.0507	-0.1014	0	0.0507	0.3042	-0.0507	0.1521	-0.1521	0	0.0507	0.1521	0	0.0507
OG0000269	0.0499	0.1995	0.0998	0.1995	0	0.0499	0.0499	0.4489	0.0499	-0.0498	0.2494	-0.0499	0	0.0498	-0.0499	0	0	0.0499	0	0.1995	0.0499	0.2992	-0.0499	0.1496	-0.1496	0	0.0498	0.1496	0	0.1496
OG0000270	-0.0534	0.2135	0.1068	0.1067	0	0.0534	0.0534	0.427	-0.0534	0.0533	0.1601	-0.0534	0	0.0533	-0.0534	0	0	-0.0534	-0.1067	0.1067	0.0534	0.2135	0.0534	0.1601	-0.1601	0	-0.0533	0.0534	0	0.1601
OG0000271	0.0524	0.2094	0.1047	0.2094	0	-0.0524	-0.0524	0.4188	0.0524	-0.0523	0.1571	0.0524	0	0.1571	0.157	0	0	0.0524	0.0524	0.1047	0.0524	0.3141	-0.0524	0.1571	0	0	0.1571	0.0524	0.1047	0.0524
OG0000272	-0.0513	0.205	0	0.3074	0	0.0513	0.1537	0.4099	-0.0513	-0.0512	0.1537	0.0513	0	0.0512	0.0513	0	0	-0.0513	0.0513	0.1025	0.1537	0.3074	-0.0513	0.2562	0	0	0.1537	0.0513	0.1025	-0.0513
OG0000273	-0.0517	0.2066	0	0.2066	0	-0.0517	0.1549	0.4132	-0.0517	-0.2582	0.155	0.0517	0	0.155	0.0517	0	0	-0.0517	0.0517	0.1033	0.0517	0.3099	-0.0517	0.155	0	0	-0.155	0.0517	0.1033	0.0517
OG0000274	0.0522	0.2088	0	0.2088	0	0.0522	-0.0522	0.4176	-0.0522	-0.261	0.1566	-0.0522	0	0.1566	0.0522	0	0	0.0522	0.0522	0.1044	0.0522	0.3132	0.0522	-0.0522	0	0	0.1566	-0.0522	0.1044	0.0522
OG0000275	0.1506	0.2007	0	0.3011	0	0.0502	-0.0502	0.4015	-0.0502	-0.2509	0.1506	0.0502	0	0.0502	0.1506	0	0	0.1506	0.0502	0.1004	-0.0502	0.3011	0.1506	0.1506	0	0	0.1506	-0.0502	0.1004	0.1506
OG0000276	-0.0517	0.2066	0	0.3098	0	0.0517	0.0517	0.4132	-0.0517	-0.2582	0.155	-0.0517	0	0.155	0.0517	0	0	-0.0517	0.1549	0.1033	0.0517	0.2065	0.0517	0.155	0	0	-0.0516	0.1549	0.1033	-0.0517
OG0000277	0.0511	0.2044	0.1022	0.2044	0	0.0511	0.1533	0.4088	-0.0511	-0.2555	0.1533	-0.0511	0	0.1533	0.1533	0	0	0.0511	0.0511	0.1022	0.0511	0.3066	-0.0511	0.1533	0	0.1022	-0.0511	0.1533	0.1022	-0.0511
OG0000278	-0.0519	0.2077	0	0.2077	0	-0.0519	0.0519	0.4154	-0.0519	-0.2596	0.1558	-0.0519	0	0.052	0.0519	0	0	0.1558	0.0519	0.2077	0.0519	0.3115	0.0519	0.1558	0	0	0.052	-0.0519	0	0.0519
OG0000279	-0.0513	0.2054	0	0.2054	0	0.0513	0.1541	0.4109	-0.1541	-0.2568	0.1541	0.0513	0	0.1541	0.0513	0	0	0.1541	0.0513	0.1027	0.0513	0.3082	-0.0513	0.1541	0	0	-0.0514	-0.0513	0.1027	0.0513
OG0000280	0.0519	0.2077	0	0.2077	0	-0.0519	-0.0519	0.4154	-0.1558	-0.2596	0.1558	0.0519	0	0.1558	0.0519	0	0	0.0519	0.0519	0.1039	0.0519	0.3115	-0.0519	0.1558	0	0	0.052	0.0519	0.1039	-0.0519
OG0000281	0.0513	0.2054	0	0.2054	0	0.0513	-0.0513	0.4109	-0.1541	-0.2568	0.1541	0.0513	0	0.0514	0.0513	0	0	0.0513	0.0513	0.2055	0.0513	0.3082	-0.0513	0.1541	0	0	-0.0514	0.0513	-0.2055	0.0513
OG0000282	0.0515	0.103	0	0.206	0	0.0515	0.0515	0.412	-0.1545	-0.2575	0.1545	0.1545	0	0.1545	-0.0515	0	0.103	0.0515	0.0515	0.103	0.0515	0.309	0.0515	0.1545	0	0	-0.0515	0.0515	-0.206	-0.0515
OG0000283	0.0524	0.2094	0	0.2094	0	0.0524	-0.0524	0.4188	-0.157	0.2094	0.0523	-0.0524	0.1047	0.2617	0.0524	0	0.1047	0.0524	0.0524	0.1047	0.0524	0.3141	-0.0524	0.1571	0	0	-0.0523	0.0524	0.0524	-0.0524
OG0000284	0.0524	0.2094	0	0.2094	0	0.0524	0.157	0.4188	-0.157	0.1047	0.2617	-0.0524	0.1047	0.1571	-0.0524	0	0	-0.0524	0.0524	0.1047	0.0524	0.3141	-0.0524	0.1571	0	0	-0.0523	-0.0524	0.0524	-0.0524
OG0000285	-0.0525	0.2099	0	0.2099	0	0.0525	-0.0525	0.4199	-0.1575	0.105	0.2624	-0.0525	0	0.0525	0.0525	0	0	0.0525	0.0525	0.105	0.0525	0.3149	0.0525	0.1574	0	0	0.1574	-0.0525	0.1575	0.0525
OG0000286	-0.053	0.2117	0	0.2117	0	0.053	0.053	0.4234	-0.1588	0.1059	0.1588	0.053	0.1059	0.0529	0.1588	0	0	0.053	0.053	0.1059	0.053	0.3176	0.053	0.1588	0	0	0.0529	0.1588	0.053	0.053
OG0000287	0.0532	0.2129	0	0.2129	0	0.0532	-0.0532	0.4258	-0.1597	0	0.0533	-0.0532	0	0.1597	0.0532	0	0	0.0532	0.0532	0.1065	0.0532	0.3194	-0.0532	0.1597	0	0	0.0533	0.1597	0.1597	0.0532
OG0000288	0.0525	-0.3149	0	0.2099	0	0.0525	-0.0525	0.4199	-0.1575	0	0.0525	0.0525	0	0.1574	-0.0525	0	0	0.0525	0.0525	0.105	0.0525	0.3149	0.0525	0.1574	0	0	0.1574	-0.0525	0.1575	0.0525
OG0000289	0.052	-0.3123	0	0.2082	0	0.052	0.052	0.4164	-0.1562	0.1041	0.1561	0.052	0	0.1561	0.052	0	0	0.052	0.052	0.1041	0.052	0.3123	-0.052	0.1561	0	0	0.0521	0.1562	0.1562	0.052
OG0000290	0.0532	0.1595	0	0.2126	0	0.0532	-0.0532	0.4252	-0.1594	0	0.1595	0.1594	0.1063	0.1595	0.0532	0	0	0.0532	0.0532	0.1063	-0.0532	0.3189	0.0532	0.1595	0	0	-0.0531	0.1594	0.1594	-0.0532
OG0000291	0.0539	0.1618	0	0.2157	0	0.0539	0.0539	0.4313	-0.1617	0	0.1618	-0.0539	0	0.1618	-0.0539	0	0	0.0539	0.0539	0.1078	0.0539	0.3235	-0.0539	0.1618	0	0	-0.0539	-0.0539	0.1617	-0.0539
OG0000292	-0.0539	0.1618	0	0.2157	0	-0.0539	0.0539	0.4313	-0.1617	0	0.1618	0.0539	0	0.0539	-0.0539	0	0	-0.0539	0.0539	0.1078	0.0539	0.3235	0.1617	0.1618	0	0	-0.0539	0.0539	0.1617	0.0539
OG0000293	-0.0533	0.1599	0	0.2132	0	-0.0533	0.1599	0.4264	-0.1599	0	0.2665	-0.0533	0	0.0533	-0.0533	0	0	0.0533	0.0533	0.1066	0.0533	0.3198	-0.0533	0.1599	0	0	-0.0533	-0.0533	0.1599	0.0533
OG0000294	0.053	0.159	0	0.318	0	-0.053	-0.053	0.424	-0.159	0.106	0.053	-0.053	0	0.159	0.053	0	0	0.053	0.053	0.106	-0.053	0.318	-0.053	0.159	0	0	-0.159	-0.053	0.159	-0.053
OG0000295	0.0522	0.1568	0	0.3136	0	-0.0522	0.0522	0.4181	-0.1568	0.1045	0.1568	-0.0522	0	0.1568	0.0522	0	0	0.0522	0.0522	0.1045	0.0522	0.3136	-0.0522	0.2614	0.1045	0	-0.0523	-0.0522	0.1568	0.0522
OG0000296	-0.0527	0.1581	0	0.2108	0	-0.0527	0.0527	0.4216	-0.1581	0	0.2635	0.0527	0	0.1581	0.1581	0	0	0.1581	0.0527	0.1054	0.0527	0.3162	-0.0527	0.1581	0	0	-0.1581	-0.0527	0.0527	-0.0527
OG0000297	0.0532	0.1595	0	0.3189	0	-0.0532	0.0532	0.4252	-0.1594	0	0.1595	-0.0532	0	0.1595	0.0532	0	0	-0.0532	0.0532	0.1063	-0.0532	0.3189	-0.0532	0.1595	0	0	0.1595	-0.0532	0.0532	0.0532
OG0000298	-0.0533	0.1599	0	0.3198	0	-0.0533	0.0533	0.4264	-0.1599	0.1066	0.1599	-0.0533	0	0.1599	-0.0533	0	0	0.0533	0.0533	0.1066	0.0533	0.3198	-0.0533	0.1599	0	0	0.0533	0.0533	0.0533	0.0533
OG0000299	0.0555	0.1666	0	0.1111	0	-0.0555	-0.0555	0.4444	-0.1667	0	0.1666	0.0555	0	0.1666	0.0555	0	0	0.0555	0.0555	0.1111	0.0555	0.2222	-0.0555	0.1666	0	0	0.0556	0.0555	0.0555	0.0555
OG0000300	0.0539	0.1618	0	0.2157	0	0.0539	0.0539	0.4313	-0.1617	0.2157	0.1618	-0.0539	0	0.0539	0.0539	0	0	0.0539	0.0539	0.1078	0.0539	0.3235	-0.0539	0.1618	0	0	-0.0539	-0.0539	0.0539	-0.0539
OG0000301	-0.0524	0.1573	0	0.3145	0	0.0524	-0.0524	0.4193	-0.1572	-0.1048	0.2621	0.0524	0	0.1573	0.0524	0	0	0.1572	0.0524	0.1048	0.0524	0.3145	-0.0524	0.1573	0	0	-0.0524	-0.0524	0.0524	-0.0524
OG0000302	0.0532	0.1595	0	-0.3189	0	0.0532	0.1594	0.4252	-0.1594	0	0.0531	0.0532	0	0.1595	0.0532	0	0	0.0532	0.0532	0.1063	0.0532	0.3189	-0.0532	0.1595	0	0	0.0531	0.0532	0.0532	0.1594
OG0000303	-0.0544	0.1634	0	0.2724	0	0.0544	0.1634	0.4358	-0.1634	0	0.0545	0.0544	0	0.0545	0.0544	0	0	0.0544	0.0544	0.1089	0.0544	0.3268	-0.0544	0.1634	0	0.1089	0.0545	-0.0544	0.0544	0.0544
OG0000304	0.1601	0.1601	0	0.2669	0	-0.0534	0.1601	0.427	-0.1601	0	0.0533	-0.0534	0	0.2669	-0.0534	0	0	0.0534	0.0534	0.1067	0.0534	0.3202	-0.0534	0.1601	0	0	0.0533	-0.0534	0.0534	0.0534
OG0000305	-0.054	0.162	0	0.162	0	-0.054	0.162	0.432	-0.162	0	0.162	-0.054	0	0.054	-0.054	0	0	-0.054	0.054	0.108	0.054	0.324	-0.162	0.162	0	0	-0.162	0.054	0.162	-0.054
OG0000306	-0.0543	0.163	0	0.2716	0	-0.0543	0.0543	0.4345	-0.1629	0	0.163	0.0543	0	0.0543	-0.0543	0	0	0.0543	0.0543	0.1086	-0.0543	0.3259	-0.1629	0.163	0	0	-0.0543	0.0543	0.0543	-0.0543
OG0000307	0.1575	0.1574	0	0.2624	0	-0.0525	0.0525	0.4199	-0.1575	0.105	0.1574	0.0525	0	0.1574	-0.0525	0	0	0.0525	0.0525	0.105	0.0525	0.4199	-0.1575	0.1574	0	0	-0.0525	-0.0525	0.0525	-0.0525
OG0000308	0.0525	0.1574	0.105	0.1574	0	-0.0525	0.1575	0.4199	-0.1575	0	0.2624	-0.0525	0	0.1574	-0.0525	0	0	0.0525	0.0525	0.105	-0.0525	0.4199	-0.1575	0.1574	0	0	0.0525	0.0525	0.0525	0.0525
OG0000309	0.0541	0.1624	0	0.1624	0	-0.0541	0.1625	0.4332	-0.1625	0	0.1624	0.0541	0	0.0542	-0.0541	0	0	0.0541	0.0541	0.2166	0.0541	0.3249	-0.1625	0.1624	0	0	-0.0542	0.0541	0.0541	-0.0541
OG0000310	0.0534	0.1601	0	0.1601	0	0.0534	0.1601	0.427	-0.1601	0	0.2669	-0.0534	0	0.1601	-0.0534	0	0	0.0534	0.0534	0.1067	-0.0534	0.3202	-0.1601	0.1601	0	0	0.1601	0.0534	0.0534	0.0534
OG0000311	0.0541	0.1624	0	0.1624	0	-0.0541	0.1625	0.4332	-0.1625	0.1083	0.0542	-0.0541	0	0.0542	-0.0541	0	0	0.1625	0.0541	0.1083	-0.0541	0.3249	-0.1625	0.1624	0	0	0.1624	0.0541	0.0541	0.0541
OG0000312	0.0549	-0.055	0	0.1649	0	-0.0549	0.1649	0.4397	-0.1649	0	0.1649	-0.0549	0	0.1649	0.1649	0	0	-0.0549	0.0549	0.1099	0.0549	0.2199	-0.1649	0.1649	0.1099	0	0.055	-0.0549	0.0549	0.0549
OG0000313	0.0537	0.161	0	0.161	0	-0.0537	0.161	0.4294	-0.161	0.1073	0.161	0.0537	0	0.161	-0.0537	0	0.1074	-0.0537	0.0537	0.1073	0.0537	0.3221	-0.161	0.161	0	0	-0.0536	0.0537	0.161	-0.0537
OG0000314	-0.0557	0.167	0	0.167	0	-0.0557	0.0557	0	-0.1669	0	0.2782	0.0557	0	0.2782	0.1669	0	0	0.0557	0.0557	0.1113	0.0557	0.3339	-0.1669	0.167	0	0	-0.0556	-0.0557	0.0557	0.0557
OG0000315	-0.0539	0.1616	0	0.0538	0	-0.0539	0.1615	0.4307	-0.1615	0.2154	0.1616	0.0539	0	0.0538	0.0539	0	0	0.0539	0.0539	0.2154	0.0539	0.3231	-0.1615	0.1616	0	0	-0.0538	0.0539	0.0539	0.0539
OG0000316	0.162	0.162	0	0.27	0	0.054	0.054	0.432	-0.162	0	0.054	-0.054	0	0.054	0.054	0	0	0.054	0.054	0.108	-0.054	0.324	-0.162	0.162	0	0	-0.162	0.054	0.054	-0.054
OG0000317	0.054	0.162	0	0.162	0	-0.054	0.162	0.432	-0.162	0	0.27	0.054	0	0.054	-0.054	0	0	-0.054	0.054	0.108	-0.054	0.324	-0.162	0.162	0	0	0.054	0.054	0.054	-0.054
OG0000318	0.0547	0.1639	0.1093	0.1639	0	-0.0547	-0.0547	0.4371	-0.1639	0	0.1639	0.0547	0	0.0546	0.0547	0	0	-0.0547	0.0547	0.1093	-0.0547	0.3279	-0.1639	0.1639	0	0.1093	0.0546	0.0547	0.0547	0.0547
OG0000319	-0.053	0.1588	0.1059	0.2646	0	-0.053	0.053	0.4234	-0.1588	0	0.2646	0.053	0	0.1588	0.053	0	0	-0.053	0.053	0.1059	0.053	0.3176	-0.1588	0.1588	0	0	-0.0529	0.053	0.1588	0.053
OG0000320	0.0532	0.1597	0.1064	0.2661	0	0.1597	0.0532	0.4258	-0.1597	0	0.1597	-0.0532	0	0.1597	0.0532	0	0	0.0532	0.0532	0.1065	0.0532	0.3194	-0.1597	0.1597	0	0	0.1597	0.0532	0.0532	0.0532
OG0000321	0.0539	0.1616	0	0.1616	0	-0.0539	0.0539	0.4307	-0.1615	0.1077	-0.2692	-0.0539	0	0.0538	-0.0539	0	0	0.0539	0.0539	0.1077	0.0539	0.3231	-0.1615	0.1616	0	0	0.1616	0.0539	0.0539	0.0539
OG0000322	0.1613	0.1612	0.1075	0.2688	0	-0.0537	0.1613	0.43	-0.1613	0	0.1075	0.0537	0	0.1612	0.0537	0	0	0.0537	0.0537	0.1075	0.0537	0.3225	-0.1613	0.1612	0	0	-0.0538	0.0537	0.0537	-0.0537
OG0000323	0.054	0.1622	0	0.2704	0	-0.054	0.1622	0.4326	-0.1622	0.1081	0.2163	0.054	0	0.1622	0.054	0	0	0.1622	0.054	0.1081	-0.054	0.2163	-0.1622	0.1622	0	0	0.0541	-0.054	0.054	0.054
OG0000324	-0.0544	0.1632	0	0.1632	0	-0.0544	0.0544	0.4351	-0.1632	0.1088	0.1088	-0.0544	0	0.0544	0.0544	0	0	0.1632	0.1632	0.1088	-0.0544	0.3263	-0.1632	0.1632	0	0	-0.0544	0.1632	0.0544	0.0544
OG0000325	-0.0544	0.1634	0	0.1634	0	-0.0544	0.1634	0.4358	0	0.2179	0.1089	-0.0544	0	0.1634	0.0544	0	0	0.1634	0.0544	0.1089	-0.0544	0.3268	-0.1634	0.1634	0	0	-0.0545	-0.0544	0.0544	-0.0544
OG0000326	-0.0558	0.1675	0	0.1675	0	0.0558	0.0558	0.4465	0	0	0.1116	-0.0558	0	0.0558	0.0558	0	0	0.1674	0.0558	0.1116	0.0558	0.3349	-0.1674	0.1675	0	0	0.0558	0.0558	0.0558	-0.0558
OG0000327	0.0547	0.1639	0	0.1639	0	-0.0547	0.1639	0.4371	0.1093	0	0.1093	-0.0547	0	0.0546	-0.0547	0	0	-0.0547	0.0547	0.1093	-0.0547	0.3279	-0.1639	0.1639	0	0	0.1639	0.1639	0.1639	-0.0547
OG0000328	0.0552	0.1654	0	0.1654	0	-0.0552	0.0552	0.4411	0.1103	0	0.2205	0.0552	0	0.0551	0.0552	0	0	-0.0552	0.0552	0.1103	-0.0552	0.3308	-0.1654	0.1654	0	0	0.1654	-0.0552	0.0552	-0.0552
OG0000329	-0.0549	0.1649	0	0.2748	0	0.0549	0.0549	0.4397	0	0.1099	0.1099	0.0549	0	0.055	-0.0549	0	0	0.0549	0.0549	0.1099	-0.0549	0.3298	-0.1649	0.1649	0	0	0.055	0.0549	0.1649	0.0549
OG0000330	-0.0557	0.167	0	0.167	0	-0.0557	0.0557	0.4452	0	0.1113	0.1113	0.0557	0	0.0556	-0.0557	0	0	0.0557	0.1669	0.1113	-0.0557	0.3339	-0.1669	0.167	0	0	0.0556	-0.0557	0.0557	-0.0557
OG0000331	-0.0558	0.1675	0	0.1675	0	-0.0558	0.0558	0.4465	0	0	0.1116	0.0558	0	0.1675	0.0558	0	0	0.0558	0.0558	0.1116	-0.0558	0.3349	-0.1674	0.1675	0	0	0.0558	0.0558	0.0558	-0.0558
OG0000332	-0.0558	0.1675	0	0.1675	0	0.0558	0.1674	0.4465	0	0	0.1116	-0.0558	0	0.0558	0.0558	0	0	0.0558	0.0558	0.1116	-0.0558	0.3349	-0.1674	0.1675	0	0	-0.0558	-0.0558	0.0558	0.0558
OG0000333	-0.0558	0.1675	0	0.1675	0	-0.0558	-0.0558	0.4465	0	0	0.1116	0.1674	0	0.0558	-0.0558	0	0	0.0558	0.0558	0.1116	-0.0558	0.3349	-0.1674	0.1675	0	0	-0.0558	0.0558	0.0558	-0.0558
OG0000334	-0.0545	0.1636	0	0.1636	0	0.0545	0.1637	0.4364	0	0	0.1091	-0.0545	0	0.0546	0.0545	0	0	0.0545	0.0545	0.1091	0.0545	0.4364	0	0.2728	0	0	-0.0546	0.0545	0.0545	-0.0545
OG0000335	-0.0536	0.1608	0	0.1608	0	0.0536	0.1608	0.4289	0.1072	0	0.2144	-0.0536	0	0.1608	-0.0536	0	0	0.1608	0.0536	0.1072	0.0536	0.4288	0	0.1608	0	0	0.1608	0.0536	0.0536	0.0536
OG0000336	0.1662	0.1661	0	0.1661	0	-0.0554	-0.0554	0.4431	0	0.1108	0.2215	0.0554	0	0.1661	-0.0554	0	0	0.0554	0.0554	0.1108	0.0554	0.3323	0	0.1661	0	0	-0.0554	-0.0554	0.0554	-0.0554
OG0000337	-0.0559	0.1677	0	0.1677	0	-0.0559	0.0559	0.4472	0	0.1118	0.1118	-0.0559	0	0.1677	0.0559	0	0	-0.0559	0.0559	0.1118	0.0559	0.3354	0	0.1677	0	0	-0.0559	-0.0559	0.1677	0.0559
OG0000338	-0.0575	0.1724	0	0.1724	0	-0.0575	0.0575	0.4596	0.1149	0.1149	0.1149	0.0575	0	0.0574	0.0575	0	0.1149	0.0575	0.0575	0.1149	0.0575	0.2873	0	0.1724	0	0	-0.0574	-0.0575	0.0575	0.0575
OG0000339	-0.0554	0.1664	0	0.1664	0	-0.0554	-0.0554	0.5547	0	0.1109	0.1109	0.0554	0	0.1664	0.0554	0	0	-0.0554	0.0554	0.1109	0.0554	0.2773	0	0.1664	0	0	0.1664	-0.0554	0.0554	-0.0554
OG0000340	0.056	0.168	0	0.168	0	-0.056	0.056	0.4479	0.112	0.112	0.112	-0.056	0	0.168	0.168	0	0	0.056	0.056	0.112	0.056	0.2799	0	0.168	0.112	0	0.168	-0.056	0.168	0.056
OG0000341	0.1712	0.1712	0	0.1712	0	-0.057	0.057	0.3425	0	0	0.2283	-0.057	0	0.1712	-0.057	0	0	0.057	0.057	0.1141	-0.057	0.2853	0	0.1712	0.1141	0	0.1712	0.057	0.1712	-0.057
OG0000342	0.057	0.0571	0	0.1712	0	-0.057	0.1712	0.4566	0	0	0.2283	-0.057	0	0.1712	0.057	0	0	0.057	0.057	0.1141	0.057	0.2853	0	0.1712	0	0	0.0571	0.057	0.057	0.057
OG0000343	-0.0572	0.1717	0	0.1717	0	-0.0572	0.0572	0.458	0	0	0.1145	0.0572	0	0.0573	0.1718	0	0	0.0572	0.0572	0.1145	0.0572	0.2863	0	0.1717	0	0	-0.0573	0.0572	0.0572	-0.1718
OG0000344	-0.0577	0.173	0	0.173	0	-0.0577	0.0577	0.4612	0	0	0.1153	0.0577	0	0.0576	-0.0577	0	0	-0.0577	0.0577	0.1153	0.0577	0.2882	0	0.173	0	0	0.0576	0.0577	0.0577	-0.1729
OG0000345	-0.0569	0.1707	0	0.1707	0	-0.0569	0.0569	0.4551	0	0	0.1138	-0.0569	0	0.1707	0.0569	0	0	-0.0569	0.0569	0.1138	0.0569	0.2844	0	0.1707	0	0	0.1707	-0.0569	0.0569	-0.1707
OG0000346	0.0572	0.1717	0	0.1717	0	-0.0572	0.0572	0.458	0	0	0.1145	-0.0572	0	0.0573	-0.0572	0	0	-0.0572	0.0572	0.1145	0.0572	0.2863	0	0.1717	0	0	0.1717	-0.0572	0.0572	-0.1718
OG0000347	0.0573	0.172	0	0.2868	0	-0.0573	-0.0573	0.4588	0	0.1147	0.1147	-0.0573	0	0.0574	0.0573	0	0	0.0573	0.0573	0.1147	0.0573	0.2867	0	0.172	0	0	-0.0574	-0.0573	0.0573	0
OG0000348	0.0581	0.1744	0.1162	0.1744	0	-0.0581	-0.0581	0.465	0	0	0.1163	-0.0581	0	0.0582	-0.0581	0	0	0.0581	0.0581	0.1163	0.0581	0.2906	0	0.1744	0	0	-0.0582	-0.0581	0.0581	0
OG0000349	-0.057	0.1709	0	0.1709	0	-0.057	0.1709	0.4558	0	0.1139	0.1139	0.057	0	0.1709	0.057	0	0	-0.057	0.1709	0.1139	0.057	0.2849	0	0.1709	0	0	-0.0569	-0.057	0.057	0
OG0000350	-0.0587	0.1762	0	0.1762	0	-0.0587	-0.0587	0.4698	0	0	0.1175	0.0587	0	0.0588	-0.0587	0	0	0.0587	0.0587	0.1175	0.0587	0.2936	0	0.0588	0	0	-0.0588	-0.0587	0.0587	0
OG0000351	0.1709	0.0569	0	0.1709	0	0.057	0.1709	0.4558	0	0	0.1139	-0.057	0.114	0.1709	-0.057	0	0	0.057	0.057	0.1139	0.057	0.2849	0	0.1709	0	0	0.1709	-0.057	0.057	0
OG0000352	0.0583	0.0584	0	0.175	0	-0.175	0.0583	0.4666	0	0	0.1167	-0.0583	0	0.0584	-0.0583	0	0	0.0583	0.0583	0.1167	0.0583	0.2916	0	0.175	0	0	-0.0584	-0.0583	0.0583	0
OG0000353	-0.0565	0.1693	0	0.1693	0	-0.1693	-0.0565	0.4515	0	0	0.1129	0.0565	0	0.0564	-0.0565	0	0	-0.0565	0.0565	0.1129	0.0565	0.395	0	0.1693	0	0	-0.1693	-0.0565	0.0565	0
OG0000354	0.0576	0.1727	0	0.2877	0	-0.1726	0.0576	0.3452	0	0	0.2302	-0.0576	0	0.0575	0.0576	0	0	0.0576	0.0576	0.1151	-0.0576	0.2878	0	0.1727	0	0	-0.0575	-0.1726	0.0576	0
OG0000355	0.0566	0.1699	0	0.1699	0	-0.1698	0.0566	0.4529	0	0.2265	0.1132	-0.0566	0	0.0566	0.0566	0	0	0.0566	0.0566	0.1132	0.0566	0.2831	0	0.1699	0	0	0.0566	-0.1698	0.0566	0.1132
OG0000356	-0.0554	0.1661	0	0.1661	0	-0.1662	-0.0554	0.4431	0	0.2215	0.1108	-0.0554	0	0.1661	-0.0554	0	0	0.0554	0.1662	0.2215	0.0554	0.2769	0	0.1661	0	0	0.0554	-0.1662	0.0554	0.1108
OG0000357	0.0554	0.1661	0	0.1661	0	-0.1662	0.0554	0.5538	0	0.1108	0.1108	0.0554	0	0.1661	0.0554	0	0	-0.0554	0.0554	0.1108	0.0554	0.2769	0	0.1661	0	0	0.0554	-0.1662	0.0554	0
OG0000358	0.1617	0.1618	0	0.2696	0	-0.1617	-0.0539	0.4313	0	0	0.1078	-0.0539	0	0.1618	0.0539	0	0	-0.0539	0.0539	0.1078	0.0539	0.3774	0	0.1618	0	0	0.2696	-0.1617	0.0539	0.1078
OG0000359	0.1622	0.1622	0.1081	0.2704	0	-0.1622	0.1622	0.4326	0	0.1081	0.1081	0.054	0	0.0541	0.054	0	0	0.054	0.1622	0.1081	0.1622	0.3785	0	0.1622	0	0	-0.0541	-0.1622	0.054	0
OG0000360	-0.0566	0.1699	0.1132	0.1699	0	-0.1698	-0.0566	0.4529	0	0	0.1132	0.0566	0	0.0566	0.0566	0	0	0.0566	0.1698	0.1132	-0.0566	0.2831	0	0.1699	0	0	0.1699	-0.1698	0.0566	0
OG0000361	-0.0565	0.1693	0	0.1693	0	-0.1693	0.1693	0.4515	0	0	0.1129	-0.0565	0	0.0564	-0.0565	0	0	0.0565	0.0565	0.2257	0.0565	0.2822	0	0.1693	0	0.1129	-0.0564	-0.1693	0.0565	0
OG0000362	-0.0566	0.1699	0	0.1699	0	-0.1698	0.0566	0.4529	0	0.1132	0.1132	0.0566	0	0.1699	0.0566	0	0	0.0566	0.0566	0.1132	-0.0566	0.2831	0	0.1699	0	0	-0.1699	-0.1698	0.0566	0
OG0000363	-0.0562	0.1687	0	0.1687	0	-0.1688	0.1688	0.45	0	0.1125	0.1125	0.0562	0	0.1687	-0.0562	0	0	0.0562	0.0562	0.1125	0.0562	0.2812	0	0.1687	0	0	-0.1687	-0.1688	0.0562	0
OG0000364	-0.057	0.1709	0	0.1709	0	-0.1709	0.1709	0.4558	0	-0.1139	0.1139	0.057	0	0.0569	0.057	0	0	-0.057	0.057	0.1139	0.057	0.2849	0	0.1709	0	0	-0.0569	-0.1709	0.057	0
OG0000365	-0.057	0.1709	0	0.1709	0	-0.1709	0.1709	0.4558	0	0.1139	0.1139	-0.057	0	0.0569	-0.057	0	0	0.057	0.057	0.1139	0.057	0.2849	0	0.1709	0	0	-0.0569	-0.1709	0.057	0
OG0000366	-0.0587	0.1762	0	0.1762	0	-0.1762	-0.0587	0.4698	0	0	0.1175	-0.0587	0	0.0588	0.0587	0	0	0.0587	0.0587	0.1175	-0.0587	0.1762	0	0.0588	0	0	0.0588	-0.1762	0.0587	0
OG0000367	0.057	0.1709	0	0.0569	0	-0.1709	-0.057	0.4558	0.114	0	0.1139	-0.057	0	0.1709	-0.057	0	0	-0.057	0.1709	0.1139	-0.057	0.2849	0	0.1709	0	0	-0.0569	-0.1709	0.057	0
OG0000368	0.0568	0.1704	0	0.1704	0	-0.1704	-0.0568	0.4544	0	0.2272	0.1136	-0.0568	0	0.1704	-0.0568	0	0	0.0568	0.0568	0.1136	0.0568	0.284	0	0.0568	0	0	0.0568	-0.1704	0.0568	0
OG0000369	0.0571	0.1715	0	0.1715	0	-0.1715	-0.0571	0.4573	0	0.1143	0	-0.0571	0	0.0572	0.0571	0	0	0.1715	0.0571	0.1143	0.0571	0.2858	0	0.1715	0	0	-0.0572	-0.1715	0.0571	0
OG0000370	0.1672	0.1672	0.1115	0.2786	0	-0.1672	0.0558	0.4459	0	0.1115	0.1115	0.0558	0	0.1672	-0.0558	0	0	-0.0558	0.0558	0.1115	0.0558	0.2787	0	0.1672	0	0	-0.0557	-0.1672	0.0558	0
OG0000371	-0.0573	0.172	0	0.172	0	-0.1721	-0.0573	0.4588	0	0.1147	0.1147	-0.0573	0	0.0574	-0.0573	0	0	0.0573	0.0573	0.1147	0.0573	0.2867	0	0.172	0	0	-0.0574	-0.1721	0.0573	0
OG0000372	-0.057	0.1709	0	0.1709	0	-0.1709	0.057	0.4558	0	0.1139	0.1139	-0.057	0	0.1709	0.057	0	0	0.057	0.057	0.1139	-0.057	0.2849	0	0.0569	0	0	-0.1709	-0.1709	0.057	0
OG0000373	0.0565	0.1693	0	0.1693	0	-0.1693	0.1693	0.4515	0	0	0.1129	-0.0565	0	-0.0564	0.0565	0	0	-0.0565	0.1693	0.1129	0.0565	0.2822	0	0.1693	0	0	-0.1693	-0.1693	0.0565	0
OG0000374	0.0566	0.1699	0	0.1699	0	-0.1698	0.1698	0.4529	0	0	0.1132	0.0566	0	0.0566	-0.0566	0	0	-0.0566	0.0566	0.1132	-0.0566	0.2831	0.1132	0.1699	0	0	-0.1699	-0.1698	0.0566	0
OG0000375	0.057	0.1709	0	0.1709	0	-0.1709	0.1709	0.4558	0	0.1139	0.1139	-0.057	0	0.0569	-0.057	0	0	-0.057	0.057	0.1139	0.057	0.2849	0	0.1709	0	0	-0.0569	-0.1709	0.057	0
OG0000376	0.0562	0.1687	0	0.1687	0	-0.1688	0.1688	0.45	0	0.1125	0.1125	-0.0562	0	-0.1687	-0.0562	0	0	-0.0562	0.0562	0.1125	0.0562	0.2812	0	0.1687	0	0	-0.1687	-0.1688	0.0562	0
OG0000377	0.0562	0.1687	0.1125	0.1687	0	-0.1688	-0.0562	0.45	0.1125	0.1125	0.1125	-0.0562	0	-0.1687	0.0562	0	0	-0.0562	0.0562	0.1125	0.0562	0.2812	0	0.1687	0	0	-0.1687	-0.1688	0.0562	0
OG0000378	-0.0554	0.0554	0.1108	0.1661	0	-0.1662	-0.0554	0.4431	0	0.1108	0.2215	0.0554	0	0.0554	0.0554	0	0	0.1662	0.0554	0.1108	0.0554	0.2769	0	0.1661	0	0.1108	-0.2769	-0.1662	0.0554	0
OG0000379	-0.0558	0.1675	0.1116	0.2791	0	0.1116	-0.0558	0.4465	0	0.1116	0	-0.0558	0	0.0558	-0.0558	0	0	-0.0558	0.0558	0.1116	0.0558	0.2791	0	0.1675	0	0.1116	-0.2791	-0.1674	0.0558	0
OG0000380	-0.0548	0.1644	0	0.1644	0	0	0.1644	0.548	0	0.1096	0.1096	0.0548	0	0.0548	-0.0548	0	0	0.0548	0.0548	0.1096	0.0548	0.274	0	0.1644	0	0.1096	-0.274	-0.1644	0.0548	0
OG0000381	-0.057	0.1712	0	0.1712	0	0	0.057	0.4566	0	0	0	-0.057	0	-0.0571	-0.057	0	0	0.057	0.057	0.1141	0.057	0.2853	0	0.1712	0.1141	0	-0.2854	-0.1712	0.057	0
OG0000382	-0.0561	0.2808	0	0.1685	0	0	0.1685	0.4493	0	0	0.1123	-0.0561	0	0.0562	0.0561	0	0	-0.0561	0.0561	0.1123	-0.0561	0.2808	0	0.0562	0.1123	0	-0.2808	-0.1685	0.0561	0
OG0000383	-0.0569	0.1707	0	0.1707	0	0	-0.0569	0.4551	0	0	0.1138	-0.0569	0	-0.0569	0.0569	0	0	0.0569	0.0569	0.1138	-0.0569	0.2844	0	0.1707	0.1138	0	-0.2844	-0.1707	0.0569	0
OG0000384	-0.0558	0.1675	0	0.2791	0	0	-0.0558	0.4465	0	0.1116	0.1116	-0.0558	0	-0.0558	-0.0558	0	0	0.0558	0.0558	0.1116	-0.0558	0.2791	0	0.1675	0.1116	0.1116	-0.2791	-0.1674	0.0558	0
OG0000385	0.0567	0.1701	0	0.1701	0	0	0.0567	0.4536	0	0	0.1134	-0.0567	0	-0.1701	-0.0567	0	0	0.0567	0.0567	0.1134	-0.0567	0.2835	0	0.1701	0	0	-0.2835	-0.1701	0.0567	0
OG0000386	-0.0549	0.1649	0	0.1649	0	0	-0.0549	0.4397	0	0.2199	0.1099	-0.0549	0	-0.1649	-0.0549	0	0	-0.0549	0.0549	0.1099	-0.0549	0.3848	0	0.1649	0	0	-0.2748	-0.1649	0.0549	0
OG0000387	0.0564	0.1691	0	0.1691	0	0	0.169	0.4508	0	0	0.1127	0.0564	0	-0.1691	-0.0564	0	0	0.0564	0.0564	0.1127	-0.0564	0.2818	0	0.1691	0	0	-0.2817	-0.169	0.0564	0
OG0000388	-0.0557	0.167	0	0.167	0	0	-0.0557	0.4452	0	0	0.2226	0.0557	0	-0.167	-0.0557	0	0	-0.0557	0.0557	0.2226	-0.0557	0.2782	0	0.167	0	0	-0.2782	-0.1669	0.0557	0
OG0000389	0.0564	0.1691	0	0.2817	0	0	-0.0564	0.338	0	0.1127	0.1127	-0.0564	0	-0.2817	-0.0564	0	0	0.0564	0.0564	0.1127	0.0564	0.2818	0	0.1691	0	0	-0.2817	-0.169	0.0564	0
OG0000390	0.0557	0.167	0	0.167	0	0	0.1669	0.4452	0	0.1113	0.2226	0.0557	0	-0.2782	0.0557	0	0	-0.0557	0.0557	0.1113	-0.0557	0.1669	0	0.167	0	0	-0.2782	-0.1669	0.0557	0
OG0000391	0.0561	0.1682	0	0.2804	0	0	0.0561	0.4486	0	0	0.2243	0.0561	0	0.1121	0.0561	0	0	-0.0561	0.0561	0.1121	-0.0561	0.2804	0	0.1682	0	0	-0.2804	-0.1682	0.0561	0
OG0000392	-0.0573	0.172	0	0.172	0	0	-0.0573	0.4588	0	0	0.1147	-0.0573	0	0.1147	0.0573	0	0	-0.0573	0.0573	0.1147	-0.0573	0.2867	0	0.172	0	0	-0.2868	-0.1721	0.0573	0
OG0000393	0.0568	0.1704	0	0.1704	0	0	-0.0568	0.4544	0	0.1136	0.1136	-0.0568	0	0.1136	0.1704	0	0	0.0568	0.0568	0.1136	-0.0568	0.284	0	0.1704	0	0	-0.284	-0.1704	0.0568	0
OG0000394	0.0562	0.0563	0	0.2813	0	0	0.1688	0.45	0.1125	0.1125	0.1125	-0.0562	0	0.1125	0.0562	0	0	0.0562	0.0562	0.1125	-0.0562	0.2812	0	0.1687	0	0	-0.2813	-0.1688	0.0562	0
OG0000395	-0.0579	-0.1735	0	0.1735	0	0	0.0579	0.4627	0.1157	0	0.1157	-0.0579	0	0.1157	-0.0579	0	0	0.0579	0.0579	0.1157	0.0579	0.2892	0	0.1735	0	0	-0.2892	0	0.0579	0
OG0000396	-0.0565	0.1696	0	0.2826	0	0	0.0565	0.4522	0	0.1131	0.2261	-0.0565	0	0.1131	-0.0565	0	0	0.0565	0.0565	0.1131	0.0565	0.2826	0	0.1696	0	0	-0.2826	0	0.0565	0
OG0000397	-0.0572	0.1717	0	0.1717	0	0.1145	0.1718	0.458	0.1145	0	0.1145	-0.0572	0	0.1145	-0.0572	0	0	-0.0572	0.0572	0.1145	-0.0572	0.2863	0	0.1717	0	0	-0.2863	0	0.0572	0
OG0000398	-0.0575	0.1724	0	0.1724	0	0	-0.0575	0.4596	0	0	0.1149	-0.0575	0	0.1149	-0.0575	0	0	0.1723	0.0575	0.1149	0.0575	0.2873	0	0.1724	0	0	-0.2872	0.1149	0.0575	0
OG0000399	-0.0567	0.1701	0	0.1701	0	0	0.1701	0.4536	0	0.2268	0.1134	0.0567	0	0.1134	-0.0567	0	0	0.0567	0.0567	0.1134	-0.0567	0.2835	0	0.1701	0	0	-0.2835	0.1134	0.0567	0
OG0000400	-0.0575	0.1724	0	0.1724	0	0	0.1723	0.4596	0	0	0.1149	0.0575	0	0.1149	0.0575	0	0	-0.0575	0.0575	0.1149	-0.0575	0.2873	0	0.1724	0	0	-0.2872	0.1149	0.0575	0
OG0000401	-0.0572	0.1717	0.1145	0.1717	0	0	0.1718	0.458	0	0	0.1145	0.0572	0	0.1145	-0.0572	0	0.1145	0.0572	0.0572	0.1145	-0.0572	0.2863	0	0.1717	0	0	-0.2863	0	0.0572	0
OG0000402	-0.0591	0.1771	0	0.1771	0	0	0.1771	0.3541	0	0	0.1181	-0.0591	0	0.1181	-0.0591	0	0	-0.0591	0.0591	0.1181	0.0591	0.2952	0	0.1771	0	0	-0.2951	0	0.0591	0
OG0000403	-0.0577	0.173	0	0.173	0	0	0.1729	0.4612	0	0	0.1153	-0.0577	0	0.1153	0.0577	0	0	-0.0577	0.0577	0.1153	0.0577	0.2882	0	0.173	0	0	-0.2882	0	0.0577	0
OG0000404	-0.0565	0.1696	0	0.1696	0	0	0.0565	0.4522	0	0	0.1131	0.0565	0	0.2261	0.1696	0	0	-0.0565	0.0565	0.1131	-0.1696	0.2826	0	0.1696	0	0	-0.2826	0.113	0.0565	0
OG0000405	-0.0569	0.1707	0.1138	0.1707	0	0	-0.0569	0.4551	0	0	0.1138	0.0569	0	0.1138	-0.0569	0	0	-0.0569	0.0569	0.2276	-0.1707	0.2844	0	0.1707	0	0	-0.2844	0	0.0569	0
OG0000406	-0.057	0.1712	0	0.1712	0	0	0.1712	0.4566	0	0.1141	0.1141	-0.057	0	0.1141	0.057	0	0	-0.057	0.057	0.1141	-0.1712	0.2853	0	0.1712	0	0	-0.2854	0	0.057	0
OG0000407	-0.0564	0.2817	0	0.1691	0	0	0.169	0.4508	0	0	0.1127	-0.0564	0	0.1127	-0.0564	0	0	0.0564	0.0564	0.1127	-0.169	0.2818	0	0.1691	0	0.1127	-0.2817	0	0.0564	0
OG0000408	-0.0564	0.1691	0	0.1691	0	0.1127	0.0564	0.4508	0	0	0.1127	-0.0564	0	0.1127	-0.0564	0	0	-0.0564	0.0564	0.1127	-0.169	0.3944	0	0.1691	0	0	-0.2817	0	0.0564	0
OG0000409	-0.0575	0.1724	0	0.1724	0	0	0.1723	0.4596	0	0.1149	0.1149	-0.0575	0	0.1149	-0.0575	0	0	0.0575	0.0575	0.1149	-0.1723	0.2873	0	0.0574	0	0	-0.2872	0	0.0575	0
OG0000410	0.0575	0.1724	0	0.1724	0	0	-0.0575	0.4596	0.1149	0	0.1149	-0.0575	0	0.1149	-0.0575	0	0	-0.0575	0.0575	0.1149	-0.1723	0.2873	0	0.1724	0	0	-0.2872	0	0.0575	0
OG0000411	-0.0575	0.1724	0	0.1724	0	0	-0.0575	0.4596	0	0.1149	0.1149	-0.0575	0	0.1149	-0.0575	0	0	-0.0575	0.0575	0.1149	-0.1723	0.2873	0	0.1724	0	0	-0.2872	0	0.0575	0
OG0000412	-0.0565	0.1696	0	0.1696	0	0.113	-0.0565	0.4522	0	0	0.2261	-0.0565	0	0.1131	-0.0565	0	0	0.0565	0.0565	0.1131	-0.1696	0.2826	0	0.1696	0	0	-0.2826	0	0.1696	0
OG0000413	-0.0561	0.1685	0	0.2808	0	0	-0.0561	0.4493	0	0.2247	0.1123	0.0561	0	0.1123	0.0561	0	0	-0.0561	0.0561	0.1123	-0.1685	0.2808	0	0.1685	0	0	-0.2808	0	0.0561	0
OG0000414	-0.0572	0.1717	0	0.1717	0	0	-0.0572	0.458	0	0	0.1145	-0.0572	0	0.1145	-0.0572	0	0	-0.0572	0.1718	0.1145	-0.1718	0.2863	0	0.1717	0	0	-0.2863	0	0.0572	0
OG0000415	0.0577	0.173	0	0.173	0	0	0.0577	0.4612	0	0	0.1153	-0.0577	0	0.1153	-0.0577	0	0	-0.0577	0.0577	0.1153	-0.1729	0.2882	0	0.173	0	0	-0.2882	0	0.0577	0
OG0000416	-0.0564	0.1691	0	0.1691	0	0.1127	-0.0564	0.4508	0	0.2254	0.1127	-0.0564	0	0.1127	-0.0564	0	0	-0.169	0.0564	0.1127	-0.169	0.2818	0	0.0563	0	0	-0.2817	0	0.169	0
OG0000417	-0.058	0.1738	0	0.1738	0	0.1159	-0.058	0.4635	0	0	0.1159	-0.058	0	0.1159	-0.058	0	0	-0.1738	0.058	0.1159	-0.1738	0.2897	0	0.1738	0	0	0.1159	0.1159	0.1738	0
OG0000418	-0.0585	0.1756	0	0.1756	0	0	0.1756	0.4682	0	0	0.1171	-0.0585	0	0.1171	-0.0585	0	0	-0.1756	0.0585	0.1171	-0.1756	0.2926	0	0.1756	0	0	0	0	0.0585	0
OG0000419	-0.058	0.1738	0	0.1738	0.1159	0	-0.058	0.4635	0.1159	0	0.2317	-0.058	0	0.1159	-0.058	0	0	-0.1738	0.058	0.1159	-0.1738	0.2897	0	0.1738	0	0	0	0	0.058	0
OG0000420	-0.0587	0.1762	0	0.1762	0	0	0.0587	0.4698	0.1174	0	0.1175	-0.0587	0	0.1175	-0.0587	0	0	-0.1762	0.0587	0.1175	-0.1762	0.2936	0	0.1762	0	0	0	0	0.0587	0
OG0000421	-0.058	0.1738	0	0.1738	0	0.1159	-0.058	0.4635	0.1159	0	0.2317	-0.058	0	0.1159	-0.058	0	0	-0.1738	0.058	0.1159	-0.1738	0.2897	0	0.1738	0	0	0	0	0.058	0
OG0000422	-0.0579	0.1735	0	0.1735	0	0.1157	-0.0579	0.4627	0	0.1157	0.1157	-0.0579	0	0.1157	0.0579	0	0	0	0.0579	0.1157	-0.1735	0.4048	0	0.1735	0	0	0	0.1157	0.0579	0
OG0000423	-0.0596	0.1787	0	0.1787	0	0.1191	-0.0596	0.4764	0.1191	0.1191	0.1191	-0.0596	0	0.1191	0.0596	0	0	0	0.0596	0.1191	0	0.2978	0	0.1787	0	0	0.1191	0	0.0596	0
OG0000424	-0.0594	0.1781	0	0.1781	0	0.1187	0.178	0.4748	0	0.1187	0.1187	-0.0594	0	0.1187	-0.0594	0	0	0	0.0594	0.1187	0	0.2967	0	0.1781	0	0	0.1187	0	0.0594	0
OG0000425	-0.0585	0.1756	0	0.2926	0	0.117	-0.0585	0.4682	0	0.1171	0.1171	-0.0585	0	0.1171	-0.0585	0	0	0	0.1756	0.1171	0	0.2926	0	0.1756	0	0	0.1171	0	0.0585	0
OG0000426	-0.0581	0.1744	0	0.2906	0	0	-0.0581	0.465	0	0	0.1163	-0.0581	0	0.1163	-0.0581	0	0	0	0.1744	0.1163	0	0.2906	0	0.1744	0	0	0.2325	0.1162	0.0581	0
OG0000427	-0.0597	0.1792	0	0.1792	0	0	0.0597	0.4781	0	0	0.1195	-0.0597	0	0.1195	-0.0597	0	0	0	0.0597	0.1195	0.1195	0.2988	0	0.1792	0	0	0.1195	0.1195	0.0597	0
OG0000428	-0.1756	0.1756	0	0.1756	0	0	-0.0585	0.4682	0	0	0.1171	-0.0585	0	0.1171	-0.0585	0	0	0	0.0585	0.1171	0	0.4096	0	0.1756	0	0	0	0.117	0.0585	0
OG0000429	-0.1833	0.1832	0	0.1832	0	0	-0.0611	0.3665	0	0	0.1222	-0.1833	0	0.1222	-0.0611	0	0	0	0.0611	0.1222	0	0.3054	0	0.0611	0	0	0.1222	0.1222	0.0611	0
OG0000430	-0.1774	0.1774	0	0.1774	0	0	-0.0592	0.4731	0	-0.1183	0.1183	-0.1774	0	0.1183	-0.0592	0	0	0	0.0592	0.1183	0	0.2957	0	0.1774	0	0	0	0.1183	0.0592	0
OG0000431	-0.1744	0.1744	0	0.1744	0	0	-0.0581	0.465	0	0.2325	0.1163	-0.1744	0	0.1163	-0.1744	0	0	0	0.0581	0.1163	0	0.2906	0	0.1744	0	0	0.1163	0	0.0581	0
OG0000432	-0.175	0.175	0	0.175	0	0	-0.0583	0.4666	0.1166	0	0.1167	-0.175	0	0.1167	-0.175	0	0	0	0.0583	0.1167	0	0.2916	0	0.175	0	0	0	0.1166	0.175	0
OG0000433	-0.175	0.175	0	0.175	0	0	-0.0583	0.4666	0	0	0.1167	-0.175	0	0.1167	-0.175	0	0	0	0.0583	0.1167	0	0.2916	0	0.175	0	0	0.1167	0.1166	0.175	0
OG0000434	-0.1732	0.1732	0	0.1732	0	0	-0.0578	0.4619	0	0.1155	0.1155	-0.1732	0	0.1155	-0.1732	0	0	0	0.0578	0.2309	0	0.2887	0	0.1732	0	0	0	0.1155	0.1732	0
OG0000435	-0.1756	0.1756	0	0.1756	0	0	-0.0585	0.4682	0	0	0.1171	-0.1756	0	0.1171	-0.1756	0	0	0	0.0585	0.1171	0	0.2926	0	0.1756	0	0	0	0.117	0.1756	0
OG0000436	-0.1738	0.1738	0	0.1738	0	0	-0.058	0.4635	0	0	0.1159	-0.1738	0	0.1159	-0.1738	0	0	0	0.058	0.1159	0	0.2897	0	0.2896	0	0	0.1159	0	0.058	0.1159
OG0000437	-0.1704	0.1704	0	0.1704	0	0	-0.1704	0.4544	0	0	0.1136	-0.1704	0	0.1136	-0.1704	0	0	0	0.0568	0.1136	0	0.284	0	0.284	0	0	0.2272	0	0.1704	0
OG0000438	-0.175	0.175	0	0.175	0	0	-0.175	0.4666	0	0.1167	0.1167	-0.175	0	0.1167	-0.175	0	0	0	0.0583	0.1167	0	0.2916	0	0.175	0	0	0.1167	0	0.0583	0
OG0000439	-0.1709	0.1709	0	0.1709	0	0	-0.1709	0.4558	0	0.2279	0.1139	-0.1709	0	0.1139	-0.1709	0	0	0	0.057	0.1139	0	0.2849	0	0.2849	0	0	0.1139	0	0.057	0
OG0000440	-0.1738	0.1738	0	0.1738	0	0	-0.1738	0.4635	0	0	0.1159	-0.1738	0	0.1159	-0.1738	0	0	0.1159	0.058	0.2317	0	0.2897	0	0.1738	0	0	0	0	0.058	0
OG0000441	-0.1726	0.1727	0	0.1727	0	0	-0.1726	0.4604	0.1151	0.2302	0.1151	-0.1726	0	0.1151	-0.1726	0	0	0	0.0576	0.1151	0	0.2878	0	0.1727	0	0	0.1151	0	0.0576	0
OG0000442	-0.1744	0.1744	0	0.1744	0	0	-0.1744	0.465	0	0.1163	0.1163	-0.1744	0	0.1163	-0.1744	0	0	0.1162	0.0581	0.1163	0	0.2906	0	0.1744	0	0	0.1163	0	0.0581	0
OG0000443	-0.1744	0.1744	0	0.1744	0	0	-0.1744	0.465	0	0.1163	0.1163	-0.1744	0	0.1163	-0.1744	0	0	0	0.0581	0.1163	0	0.2906	0	0.1744	0	0	0	0	0.1744	0
OG0000444	-0.1715	0.1715	0	0.1715	0	0	-0.1715	0.4573	0.1143	0.1143	0.1143	-0.1715	0	0.1143	-0.1715	0	0.1143	0	0.0571	0.1143	0.1143	0.2858	0.1143	0.1715	0	0	0.1143	0	0.1715	0
OG0000445	-0.1759	0.1759	0	0.1759	0	0	-0.1759	0.469	0	0	0.1173	-0.1759	0	0.1173	0.1172	0	0	0	0.0586	0.1173	0	0.2931	0	0.1759	0.1172	0.1172	0.1173	0	0.0586	0
OG0000446	-0.1735	0.1735	0	0.1735	0	0	-0.1735	0.4627	0	0	0.1157	-0.1735	0	0.1157	0.1157	0	0	0	0.0579	0.1157	0	0.4048	0	0.1735	0.1157	0	0	0	0.0579	0
OG0000447	0	0.0566	0	0.1699	0	0	-0.1698	0.5661	0	0	0.2265	-0.1698	0	0.1132	0.1132	0	0	0	0.0566	0.1132	0	0.3963	0	0.1699	0	0	0.1132	0	0.0566	0
OG0000448	0	0.172	0	0.172	0	0	-0.1721	0.5735	0	0	0.2294	-0.1721	0	0.1147	0	0	0	0	0.0573	0.1147	0	0.2867	0	0.172	0.1147	0	0	0.1147	0.0573	0
OG0000449	0.1179	0.1768	0	0.1768	0	0	-0.1768	0.4714	0	0.1179	0.2357	-0.1768	0	0.1179	0	0	0	0	0.059	0.1179	0	0.2947	0	0.1768	0	0	0.1179	0	0.059	0
OG0000450	0	0.1787	0	0.1787	0	0	-0.1786	0.4764	0.1191	0.1191	0.1191	-0.1786	0	0.1191	0	0	0	0	0.0596	0.1191	0	0.2978	0	0.1787	0	0	0.1191	0	0.0596	0
OG0000451	0	0.1762	0	0.1762	0	0	-0.1762	0.4698	0	0	0.1175	-0.1762	0	0.1175	0	0	0	0.1174	0.0587	0.1175	0	0.2936	0	0.1762	0	0	0.2349	0	0.1762	0
OG0000452	0	0.1774	0	0.2957	0	0	-0.1774	0.4731	0	0	0.1183	-0.1774	0	0.1183	0	0	0	0	0.0592	0.1183	0	0.2957	0	0.1774	0	0	0.1183	0	0.0592	0
OG0000453	0	0.1832	0	0.1832	0	0	-0.1833	0.3665	0.1222	0.1222	0.1222	-0.1833	0	0.1222	0	0	0	0	0.0611	0.1222	0	0.3054	0	0.1832	0	0	0.1222	0	0.0611	0
OG0000454	0	0.1744	0	0.1744	0	0	-0.1744	0.465	0	0	0.2325	-0.1744	0	0.1163	0	0	0	0	0.0581	0.1163	0	0.4069	0	0.1744	0	0	0.1163	0	0.0581	0
OG0000455	0	0.1787	0	0.1787	0	0	-0.1786	0.4764	0	0.1191	0.1191	-0.1786	0	0.1191	0	0	0	0.1191	0.0596	0.1191	0	0.2978	0	0.1787	0	0	0	0.1191	0.0596	0
OG0000456	0	0.1768	0	0.1768	0	0.1179	-0.1768	0.4714	0	0	0.2357	-0.1768	0	0.1179	0	0.1179	0	0	-0.059	0.1179	0	0.2947	0	0.1768	0	0	0	0.1179	0.059	0
OG0000457	0	0.1816	0	0.1816	0	0	-0.1816	0.4842	0.121	0	0	0	0	0.1211	0	0	0	0	0.0605	0.1211	0	0.3026	0	0.1816	0	0	0	0.121	0.0605	0.121
OG0000458	0	0.1796	0	0.1796	0	0	-0.1796	0.4789	0.1197	0	0.2395	0	0	0.1197	0	0	0	0	0.0598	0.1197	0	0.2993	0	0.1796	0	0	0.1197	0	0.0598	0
OG0000459	0	0.1843	0	0.1843	0	0	-0.1843	0.4915	0.1229	0	0.1229	0	0	0.1229	0	0	0	0	0.0615	0.1229	0	0.1842	0	0.1843	0	0	0	0	0.0615	0.1229
OG0000460	0	0.1796	0	0.2993	0	0	-0.1796	0.4789	0	0.1197	0.1197	0	0	0.1197	0	0	0	0	0.0598	0.1197	0	0.2993	0	0.1796	0	0	0	0	0.0598	0
OG0000461	0	0.1796	0	0.1796	0	0	-0.1796	0.4789	0	0.2395	0.1197	0	0	0.1197	0	0	0	0	0.0598	0.1197	0	0.2993	0	0.1796	0.1197	0	0	0	0.0598	0
OG0000462	0	0.1789	0	0.1789	0	0	-0.179	0.4772	0	0.2386	0.1193	0	0	0.1193	0	0	0	0	0.0596	0.1193	0	0.2982	0	0.1789	0	0	-0.1193	0	0.0596	0.1193
OG0000463	0.1197	0.1796	0	0.1796	0	0	-0.1796	0.4789	0	0	0.1197	0	0	0.1197	0	0	0	0	0.0598	0.2395	0	0.2993	0	0.1796	0	0	0.1197	0	0.0598	0
OG0000464	0	0.1809	0	0.1809	0	0	-0.1809	0.4824	0	0.1206	0.1206	0	0	0.1206	0.1206	0	0	0	0.0603	0.1206	0	0.3015	0	0.1809	0	0	0.1206	0	0.0603	0
OG0000465	0	0.1802	0.1202	0.1802	0	0.1202	-0.1803	0.4807	0	0.1202	0.1202	0	0	0.1202	0	0	0	0	0.0601	0.1202	0	0.3004	0	0.1802	0	0.1202	0	0	0.0601	0
OG0000466	0	0.1823	0.1215	0.1823	0	0	-0.1822	0.486	0	0	0.1215	0	0	0.1215	0	0	0	0	0.0608	0.1215	0	0.3038	0	0.1823	0	0	0	0	0.0608	0
OG0000467	0	0.1802	0	0.3004	0	0	-0.1803	0.4807	0	0	0.1202	0	0	0.1202	0	0.1202	0	0	0.0601	0.1202	0	0.3004	0	0.0601	0	0	0	0.1202	0.0601	0
OG0000468	0	0.1789	0	0.1789	0	0	-0.179	0.4772	0	0	0.1193	0	0	0.1193	0	0	0	0	0.0596	0.1193	0	0.2982	0	0.2983	0	0	0.1193	0	0.0596	0.1193
OG0000469	0	0.1809	0	0.1809	0	0	-0.1809	0.4824	0	0	0.2412	0	0	0.1206	0	0	0	0	0.0603	0.1206	0	0.3015	0	0.1809	0	0	0	0	0.0603	0
OG0000470	0	0.1816	0	0.1816	0	0	-0.1816	0.4842	0	0	0.1211	0	0	0.1211	0	0	0.121	0	0.0605	0.1211	0	0.3026	0	0.1816	0	0	0.1211	0	0.0605	0
OG0000471	0	0.1809	0	0.1809	0	0	-0.1809	0.4824	0	0.1206	0.1206	0	0	0.1206	0	0	0	0	0.0603	0.1206	0.1206	0.3015	0.1206	-0.0603	0	0	0.1206	0	0.0603	0.1206
OG0000472	0	0.1816	0	0.1816	0	0	-0.1816	0.4842	0	0.1211	0.1211	0	0	0.1211	0	0	0	0	0.0605	0.1211	0	0.3026	0	0.1816	0	0	0.1211	0	0.0605	0
OG0000473	0	0.1816	0	0.1816	0	0	-0.1816	0.4842	0	0.1211	0.1211	0	0	0.1211	0	0	0	0	0.0605	0.1211	0	0.3026	0	0.1816	0	0	0.1211	0	0.0605	0
OG0000474	0	0.1777	0	0.1777	0	0	-0.1777	0.4739	0	0.1185	0.1185	0	0	0.1185	0.1185	0	0.1185	0.1185	0.0593	0.1185	0	0.2962	0	0.2962	0	0	0	0	0.0593	0
OG0000475	0	0.1741	0	0.1741	0	0	-0.1741	0.5803	0	0	0.1161	0	0	0.1161	0	0	0	0	0.0581	0.1161	0	0.2902	0	0.2901	0	0	0.1161	0	0.0581	0
OG0000476	0	0.1823	0	0.1823	0	0	-0.1822	0.486	0	0	0.1215	0	0	0.1215	0	0	0	0	0.0608	0.1215	0	0.3038	0	0.1823	0.1215	0	0	0	0.0608	0
OG0000477	0	0.1789	0	0.1789	0	0	-0.179	0.4772	0.1193	0.1193	0.1193	0	0	0.1193	0	0	0	0	0.0596	0.1193	0.1193	0.2982	0	0.1789	0	0	0.1193	0	0.179	0
OG0000478	0	0.1809	0	0.1809	0	0	-0.1809	0.4824	0.1206	0	0.1206	0.1206	0	0.1206	0	0	0	0	0.0603	0.1206	0	0.3015	0	0.1809	0	0	0.1206	0	0.0603	0
OG0000479	0	0.1809	0	0.1809	0	0.1206	-0.1809	0.4824	0.1206	0	0.1206	0	0	0.1206	0	0	0	0	0.0603	0.1206	0	0.3015	0	0.1809	0	0	0.1206	0	0.0603	0
OG0000480	0	0.1809	0	0.1809	0	0	-0.1809	0.4824	0.1206	0	0.1206	0	0	0.1206	0.1206	0	0	0	0.0603	0.1206	0	0.3015	0	0.1809	0.1206	0	0	0	0.0603	0
OG0000481	0	0.0607	0	0.1823	0	0	-0.1822	0.486	0.1215	0	0.1215	0	0	0.1215	0	0	0	0	0.0608	0.1215	0	0.3038	0	0.1823	0	0	0.1215	0	0.0608	0.1215
OG0000482	0	0.1809	0.1206	0.1809	0	0.1206	-0.1809	0.4824	0	0	0.1206	0	0	0.1206	0	0	0	0	0.0603	0.1206	0	0.3015	0	0.1809	0.1206	0	0	0	0.0603	0
OG0000483	0	0.1816	0	0.1816	0	0	-0.1816	0.4842	0	0	0.1211	0	0	0.1211	0	0	0	0	0.0605	0.1211	0	0.3026	0	0.1816	0	0	0	0	0.1816	0
OG0000484	0	0.1823	0	0.1823	0	0	-0.1822	0.486	0	0	0.1215	0	0	0.1215	0	0	0	0	0.0608	0.1215	0	0.3038	0	0.1823	0	0	0.1215	0	0.0608	0
OG0000485	0	0.1809	0	0.1809	0	0	-0.1809	0.4824	0	0	0.1206	0	0	0.1206	0	0	0	0	0.0603	0.1206	0	0.3015	0	0.1809	0	0	0.1206	0	0.1809	0
OG0000486	0	0.1816	0	0.1816	0	0	-0.1816	0.4842	0	0	0.1211	0	0	0.1211	0	0	0	0	0.0605	0.1211	0	0.3026	0	0.1816	0	0	0.1211	0.121	0.0605	0
OG0000487	0	0.1816	0	0.1816	0	0	-0.1816	0.4842	0	0	0.1211	0	0	0.1211	0	0	0	0	0.0605	0.1211	0.121	0.3026	0	0.1816	0	0	0	0	0.0605	0.121
OG0000488	0	0.0607	0	0.1823	0	0	-0.1822	0.486	0	0	0.243	0	0	0.1215	0	0	0	0	0.0608	0.1215	0	0.3038	0	0.1823	0	0	0	0	0.0608	0
OG0000489	0	0.1864	0	0.1864	0	0	-0.1864	0.3728	0.1243	0	0.1243	0	0	0.1243	0	0	0	0	0.0622	0.1243	0	0.3107	0	0.1864	0	0	0	0.1243	0.0622	0
OG0000490	0	0.1823	0	0.1823	0	0	-0.1822	0.486	0	0.1215	0.1215	0	0	0.1215	0	0	0	0	0.0608	0.1215	0	0.3038	0	0.1823	0	0	0	0	0.0608	0
OG0000491	0	0.1816	0.121	0.1816	0	0	-0.1816	0.4842	0	0	0.1211	0	0	0.1211	0	0	0	0	0.0605	0.1211	0	0.3026	0	0.1816	0	0	0.1211	0	0.0605	0
OG0000492	0	0.1809	0	0.1809	0	0	-0.1809	0.4824	0	0.1206	0.1206	0	0	0.1206	0	0	0	0	0.0603	0.1206	0	0.3015	0	0.1809	0	0	0.1206	0.1206	0.0603	0
OG0000493	0	0.1796	0	0.2993	0	0	-0.1796	0.4789	0	0	0.1197	0	0	0.1197	0	0	0	0	0.0598	0.1197	0	0.2993	0	0.1796	0	0	0.1197	0	0.0598	0
OG0000494	0	0.1796	0	0.1796	0	0	-0.1796	0.4789	0	0	0.1197	0	0	0.1197	0	0	0	0	0.0598	0.1197	0	0.2993	0	0.1796	0	0	0.2395	0.1197	0.0598	0
OG0000495	0	0.1816	0	0.1816	0	0	-0.1816	0.4842	0	0	0.1211	0	0	0.1211	0	0	0	0	0.0605	0.1211	0	0.3026	0	0.1816	0	0	-0.1211	0.121	0.0605	0
OG0000496	0	0.1796	0	0.2993	0	0	-0.1796	0.4789	0	0	0.1197	0	0	0.1197	0	0	0	0	0.0598	0.1197	0	0.2993	0	0.1796	0	0	-0.1197	0	0.0598	0
OG0000497	0	0.1796	0	0.1796	0	0	-0.1796	0.4789	0	0.2395	0.1197	0	0	0.1197	0	0	0	0	0.0598	0.1197	0	0.2993	0	0.1796	0	0	0.1197	0	0.0598	0
OG0000498	0	0.1823	0	0.1823	0	0	-0.1822	0.486	0	0	0.1215	0	0	0.1215	0	0	0	0	0.0608	0.1215	0	0.3038	0	0.1823	0	0	0.1215	0	0.0608	0
OG0000499	0	0.1816	0	0.1816	0	0	-0.1816	0.4842	0	0	0.1211	0	0	0.1211	0	0	0	0	0.0605	0.1211	0	0.3026	0	0.1816	0	0.121	0.1211	0	0.0605	0
OG0000500	0	0.1823	0	0.1823	0	0	-0.1822	0.486	0	0	0.1215	0	0	0.1215	0	0	0	0	0.0608	0.1215	0	0.3038	0	0.1823	0	0	0.1215	0	0.0608	0
OG0000501	0	0.1816	0.121	0.1816	0	0	-0.1816	0.4842	0	0	0.1211	0	0	0.1211	0	0	0	0	0.0605	0.1211	0	0.3026	0	0.1816	0	0	0.1211	0	0.0605	0
OG0000502	0	0.1789	0	0.1789	0	0	-0.179	0.4772	0	0.1193	0.2386	0.1193	0	0.1193	0	0	0	0	0.0596	0.1193	0	0.2982	0	0.1789	0	0	0.1193	0	0.0596	0
OG0000503	0	0.1809	0	0.1809	0	0	-0.1809	0.4824	0.1206	0	0.1206	0	0	0.1206	0	0	0	0	0.0603	0.1206	0	0.3015	0	0.1809	0	0	0	0	0.1809	0
OG0000504	0	0.1809	0	0.1809	0	0	-0.1809	0.4824	0	0	0.2412	0	0	0.1206	0	0	0	0	0.0603	0.1206	0	0.3015	0	0.1809	0	0	0	0	0.0603	0
OG0000505	0	0.1823	0	0.1823	0	0	-0.1822	0.486	0.1215	0	0.1215	0	0	0.1215	0	0	0	0	0.0608	0.1215	0	0.3038	0	0.1823	0	0	0	0	0.0608	0
OG0000506	0	0.1796	0.1197	0.1796	0	0	-0.1796	0.4789	0	0	0.1197	0	0	0.1197	0.1197	0	0	0.1197	0.0598	0.1197	0	0.2993	0	0.1796	0	0	0.1197	0.1197	0.0598	0
OG0000507	0	0.1816	0	0.1816	0	0	-0.1816	0.4842	0	0	0	0	0	0.1211	0.121	0	0	0.121	0.0605	0.1211	0	0.3026	0	0.1816	0	0	0	0.121	0.0605	0
OG0000508	0	0.1771	0.1181	0.1771	0	0	-0.1771	0.4723	0	0	0.2361	0	0	0.1181	0	0	0	0.1181	0.0591	0.2361	0	0.2952	0	0.1771	0	0	0	0.1181	0.0591	0
OG0000509	0	0.1809	0.1206	0.1809	0	0	-0.1809	0.4824	0	0	0.1206	0	0	0.1206	0.1206	0	0	0	0.0603	0.1206	0	0.3015	0	0.1809	0	0	0	0	0.0603	0.1206
OG0000510	0	0.1816	0	0.1816	0	0	-0.1816	0.4842	0	-0.1211	0.1211	0	0	0.1211	0	0	0	0	0.0605	0.1211	0	0.3026	0	0.1816	0	0	0	0	0.0605	0.121
OG0000511	0	0.1823	0	0.1823	0	0	-0.1822	0.486	0	0	0.1215	0	0	0.1215	0	0	0	0	0.0608	0.1215	0	0.3038	0	0.1823	0	0	0.1215	0	0.0608	0
OG0000512	0	0.1796	0	0.1796	0	0	-0.1796	0.4789	0	0	0.1197	0	0	0.1197	0	0	0	0	0.1796	0.1197	0	0.2993	0	0.1796	0	0	0	0.1197	0.1796	0
OG0000513	0	0.1784	0	0.1784	0	0	-0.1783	0.4756	0	0	0.2378	0	0	0.1189	0	0	0	0	0.0595	0.1189	0	0.2973	0	0.1784	0	0	0.1189	0	0.1783	0.1189
OG0000514	0	0.1789	0	0.1789	0	0	-0.179	0.4772	0	0.2386	0.1193	0	0	0.1193	0	0	0	0	0.0596	0.1193	0	0.2982	0	0.1789	0	0	0.1193	0	0.0596	0.1193
OG0000515	0	0.1809	0	0.1809	0	0	-0.1809	0.4824	0	-0.1206	0.1206	0	0	0.1206	0	0	0	0.1206	0.0603	0.1206	0	0.3015	0	0.1809	0	0	-0.1206	0	0.0603	0
OG0000516	0	0.1809	0	0.1809	0	0	-0.1809	0.4824	0	0	0.2412	0	0	0.1206	0	0	0	0	0.0603	0.1206	0	0.3015	0	0.1809	0	0	0	0	0.0603	0
OG0000517	0.1189	0.1784	0	0.1784	0	0	-0.1783	0.4756	0	0	0.2378	0	0	0.1189	0	0	0	0.1189	0.0595	0.1189	0	0.2973	0	0.1784	0.1189	0	0.1189	0	0.0595	0
OG0000518	0	0.1823	0	0.1823	0	0	-0.1822	0.486	0	0	0.1215	0	0	0.1215	0	0	0	0	0.0608	0.1215	0	0.3038	0	0.1823	0	0	0.1215	0	0.0608	0
OG0000519	0	0.1823	0	0.1823	0	0	-0.1822	0.486	0	0	0.1215	0	0	0.1215	0	0	0	0	0.0608	0.1215	0	0.3038	0	0.1823	0	0	0	0	0.0608	0.1215
OG0000520	0	0.1823	0	0.1823	0	0	-0.1822	0.486	0	0.1215	0.1215	0	0	0.1215	0	0	0	0	0.0608	0.1215	0	0.3038	0	0.1823	0	0	0	0	0.0608	0
OG0000521	0	0.1796	0	0.2993	0	0	-0.1796	0.4789	0	0.1197	0.1197	0	0	0.1197	0	0	0	0	0.0598	0.1197	0	0.2993	0	0.1796	0	0	0	0	0.0598	0
OG0000522	0	0.1809	0	0.1809	0	0	-0.1809	0.4824	0.1206	0.1206	0.1206	0	0	0.1206	0	0	0	0	0.0603	0.1206	0	0.3015	0	0.1809	0	0	0	0.1206	0.0603	0
OG0000523	0	0.1802	0	0.1802	0	0	-0.1803	0.4807	0	0	0.1202	0	0	0.1202	0.1202	0	0	0.1202	0.0601	0.1202	0	0.3004	0	0.1802	0	0	-0.1202	0.1202	0.0601	0
OG0000524	0	0.1802	0	0.1802	0	0	-0.1803	0.4807	0	0	0.1202	0	0	0.1202	0.1202	0.1202	0	0.1202	0.0601	0.1202	0	0.3004	0	0.1802	0	0	0.1202	0	0.0601	0
OG0000525	0	0.1809	0	0.1809	0	0	-0.1809	0.4824	0	0	0.1206	0	0	0.1206	0	0	0	0	0.0603	0.1206	0	0.3015	0	0.1809	0	0	0.1206	0	0.1809	0
OG0000526	0	0.1802	0	0.1802	0	0	-0.1803	0.4807	0	-0.1202	0.1202	0	0	0.1202	0	0	0	0	0.0601	0.1202	0	0.3004	0.1202	0.1802	0	0	0.1202	0.1202	0.0601	0
OG0000527	0	0.1823	0	0.1823	0	0	-0.1822	0.486	0	-0.1215	0.1215	0	0	0.1215	0	0	0	0	0.0608	0.1215	0	0.3038	0	0.1823	0	0	0	0	0.0608	0
OG0000528	0	0.1823	0	0.1823	0	0	-0.1822	0.486	0	-0.1215	0.1215	0	0	0.1215	0	0	0	0	0.0608	0.1215	0	0.3038	0	0.1823	0	0	0	0	0.0608	0
OG0000529	0	0.1789	0	0.1789	0	0	-0.179	0.4772	0	0	0.1193	0	0	0.1193	0	0	0	0.1193	0.0596	0.1193	0	0.2982	0	0.1789	0.1193	0	0.2386	0	0.0596	0
OG0000530	0	0.1823	0	0.1823	0	0	-0.1822	0.486	0	-0.1215	0.1215	0	0	0	0	0	0	0	0.0608	0.1215	0	0.3038	0	0.1823	0	0	0.1215	0	0.0608	0
OG0000531	0	0.1802	0	0.1802	0	0	-0.1803	0.4807	0	-0.1202	0.2403	0	0	0.1202	0	0	0	0	0.0601	0.1202	0	0.3004	0	0.1802	0	0	0	0	0.0601	0
OG0000532	0.1172	0.1759	0	0.1759	0	0	-0.1759	0.469	0	-0.2345	0.1173	0	0	0.1173	0	0	0	0	0.0586	0.1173	0	0.4103	0	0.1759	0	0	0	0	0.0586	0
OG0000533	0	0.1753	0	0.1753	0	0	-0.1753	0.4674	0	-0.2337	0.1169	0	0	0.1169	0	0	0	0	0.0584	0.1169	0	0.4089	0	0.1753	0	0	0.1169	0.1168	0.0584	0
OG0000534	0.1176	0.1765	0	0.1765	0	0	-0.1765	0.4706	0	-0.2353	0.1177	0	0	0.1177	0	0	0	0	0.0588	0.2353	0	0.2941	0	0.1765	0	0	0.1177	0.1176	0.0588	0
OG0000535	0	0.1796	0	0.1796	0	0	-0.1796	0.4789	0	-0.2395	0.1197	0	0	0.1197	0	0	0	0	0.0598	0.1197	0	0.2993	0	0.1796	0	0	0.1197	0	0.0598	0
OG0000536	0	0.1789	0.1193	0.1789	0	0	-0.179	0.4772	0	-0.2386	0.1193	0	0	0.1193	0	0	0	0	0.0596	0.1193	0	0.2982	0	0.1789	0	0	0.1193	0	0.0596	0
OG0000537	0	0.1802	0	0.1802	0	0	-0.1803	0.4807	0	-0.2403	0.1202	0	0	0.1202	0	0	0	0	0.0601	0.1202	0	0.3004	0	0.1802	0	0	0	0	0.0601	0
OG0000538	0	0.1777	0	0.2962	0	0	-0.1777	0.4739	0	-0.2369	0.1185	0	0	0.1185	0	0	0	0	0.0593	0.1185	0	0.2962	0	0.1777	0	0	0	0	0.0593	0
OG0000539	0	0.1812	0	0.1812	0	0	0.1208	0.4833	0	-0.2416	0	0	0	0.1208	0.1208	0	0	0	0.0604	0.1208	0	0.3021	0	0.1812	0	0	0.1208	0	0.0604	0
OG0000540	0.1204	0.1806	0	0.1806	0	0	0.1204	0.4815	0	-0.2408	0.1204	0	0	0.1204	0	0	0	0.1204	0.0602	0.1204	0	0.301	0	0.1806	0	0	0	0	0.0602	0
OG0000541	0	0.1812	0	0.1812	0	0	0.1208	0.4833	0	-0.2416	0.1208	0	0	0.1208	0	0	0	0	0.0604	0.1208	0	0.3021	0	0.1812	0	0	0	0	0.0604	0.1208
OG0000542	0	0.1802	0	0.1802	0	0	0.1202	0.4807	0	0.0601	0.1202	0	0	0.1202	0	0	0	0	0.0601	0.1202	0	0.4206	0	0.1802	0	0.1202	0.1202	0	0.0601	0
OG0000543	0	0.1857	0	0.1857	0	0	0	0.4952	0	0.0619	0.1238	0	0	0.1238	0	0	0	0	0.0619	0.1238	0	0.3095	0	0.1857	0	0	0.1238	0	0.0619	0
OG0000544	0	0.1857	0	0.1857	0	0	0.1238	0.4952	0	0.0619	0.1238	0	0	0.1238	0	0	0	0	0.0619	0.1238	0	0.3095	0	0.1857	0	0	0	0	0.0619	0
OG0000545	0	0.1843	0	0.1843	0	0	0.1229	0.4915	0	0.0615	0.1229	0	0	0.1229	0	0	0	0	-0.0615	0.1229	0	0.3072	0	0.1843	0	0	0.1229	0.1229	0.0615	0
OG0000546	0	0.1843	0	0.1843	0	0	0.1229	0.4915	0	0.0615	0.1229	0	0	0.1229	0	0	0	0	-0.0615	0.1229	0	0.3072	0	0.1843	0	0	0.1229	0.1229	0.0615	0
OG0000547	0	0.1771	0	0.1771	0	0	0.1181	0.5903	0	0.0591	0.1181	0	0	0.1181	0	0	0	0.1181	0.0591	0.1181	0	0.2952	0.1181	0.1771	0	0	0.1181	0	0.0591	0.1181
OG0000548	0	0.1843	0	0.1843	0	0	0.1229	0.4915	0	0.0615	0.1229	0	0	0.1229	0	0	0	0.1229	0.0615	0.1229	0	0.3072	0.1229	0.1843	0	0	0	0	0.0615	0
OG0000549	0	0.1857	0	0.1857	0	0	0	0.4952	0	0.0619	0.1238	0	0	0.1238	0	0	0	0	0.0619	0.1238	0	0.3095	0	0.0619	0	0	0.1238	0	0.1857	0
OG0000550	0	0.1829	0	0.1829	0	0	0.1219	0.4877	0	0.0609	0.1219	0	0	0.1219	0	0	0	0	0.0609	0.2439	0	0.3048	0	0.1829	0	0	0.1219	0	0.0609	0
OG0000551	0	0.185	0	0.185	0	0	0.1233	0.4933	0	0.0616	0.1233	0	0	0.1233	0	0	0	0	0.0616	0.1233	0	0.3083	0	0.185	0	0	0.1233	0	0.0616	0
OG0000552	0	0.1857	0	0.1857	0	0	0.1238	0.4952	0	0.0619	0.1238	0	0	0.1238	0	0	0	0	0.0619	0.1238	0	0.3095	0	0.1857	0	0	0	0	0.0619	0
OG0000553	0	0.185	0	0.185	0	0	0.1233	0.4933	0	0.0616	0.1233	0	0	0.1233	0	0	0	0	0.0616	0.1233	0	0.3083	0	0.185	0	0	0.1233	0	0.0616	0
OG0000554	0	0.1857	0	0.1857	0	0	0.1238	0.4952	0	0.0619	0.1238	0	0	0.1238	0	0	0	0	0.0619	0.1238	0	0.3095	0	0.1857	0	0	0	0	0.0619	0
OG0000555	0	0.1843	0	0.1843	0	0	0	0.4915	0	0.0615	0.1229	0	0	0.1229	0	0	0	0	0.0615	0.1229	0	0.3072	0	0.1843	0	0	0.1229	0	0.1843	0
OG0000556	0	0.1857	0	0.1857	0	0	0.1238	0.4952	0	0.0619	0.1238	0	0	0.1238	0	0	0	0	0.0619	0.1238	0	0.3095	0	0.1857	0	0	0	0	0.0619	0
OG0000557	0	0.1864	0	0.1864	0	0	0	0.4971	0	0.0622	0.1243	0	0	0.1243	0	0	0	0	0.0622	0.1243	0	0.3107	0	0.1864	0	0	0	0	0.0622	0
OG0000558	0	0.185	0	0.0617	0	0.1233	0.1233	0.4933	0	0.0616	0.1233	0	0	0.1233	0.1233	0	0	0	0.0616	0.1233	0	0.3083	0.1233	0.185	0	0	0	0	0.0616	0
OG0000559	0	0.1836	0	0.1836	0	0	0.1224	0.4896	0	0.0612	0.2448	0	0	0.1224	0	0	0	0	0.0612	0.1224	0	0.306	0	0.1836	0	0	0	0	0.0612	0
OG0000560	0	0.185	0	0.185	0	0	0.1233	0.4933	0	0.0616	0	0	0	0.1233	0	0	0	0	0.0616	0.1233	0	0.3083	0	0.185	0	0	0.1233	0	0.0616	0.1233
OG0000561	0	0.1829	0	0.1829	0	0	0.1219	0.4877	0	0.0609	0.2439	0	0	0.1219	0	0	0	0	0.0609	0.1219	0	0.3048	0	0.1829	0	0	0	0	0.0609	0.1219
OG0000562	0	0.1857	0	0.1857	0	0	0	0.4952	0	0.0619	0.1238	0	0	0.1238	0	0	0	0	0.0619	0.1238	0	0.3095	0	0.1857	0	0	0.1238	0	0.0619	0
OG0000563	0	0.1864	0	0.1864	0	0	0	0.4971	0	0.0622	0.1243	0	0	0.1243	0	0	0	0	0.0622	0.1243	0	0.3107	0	0.1864	0	0	0	0	0.0622	0
OG0000564	0	0.1829	0	0.3049	0	0	0.1219	0.4877	0	0.0609	0.1219	0	0	0.1219	0	0	0	0	0.0609	0.1219	0	0.3048	0	0.1829	0	0	0	0	0.0609	0
OG0000565	0	0.1843	0	0.1843	0	0	0.1229	0.4915	0	0.0615	0.1229	0	0	0.1229	0	0	0	0	0.0615	0.1229	0	0.3072	0.1229	0.1843	0	0	0.1229	0	0.0615	0
OG0000566	0	0.1823	0	0.3037	0	0	0.1215	0.486	0	0.0608	0.1215	0	0	0.1215	0	0	0	0	0.0608	0.1215	0	0.3038	0	0.1823	0	0	0.1215	0	0.0608	0
OG0000567	0	0.1864	0	-0.0621	0	0	0.1243	0.4971	0	0.0622	0.1243	0	0	0.1243	0	0	0	0	0.0622	0.1243	0	0.3107	0	0.1864	0	0	-0.1243	0	0.0622	0
OG0000568	0	0.1816	0	0.3026	0	0	0.121	0.4842	0	0.0605	0.1211	0	0.121	0.1211	0	0	0	0	0.0605	0.1211	0	0.3026	0	0.1816	0	0	0	0.121	0.0605	0
OG0000569	0	0.1823	0	0.3037	0	0	0.1215	0.486	0	0.0608	0.1215	0	0	0.1215	0	0	0	0	0.0608	0.1215	0	0.3038	0.1215	0.1823	0	0	0	0	0.0608	0
OG0000570	0	0.1857	0	0.1857	0	0	0.1238	0.4952	0	0.0619	0.1238	0	0	0.1238	0	0	0	0	0.0619	0.1238	0	0.3095	0	0.1857	0	0	0	0	0.0619	0
OG0000571	0	0.1864	0	0.1864	0	0	0	0.4971	0	0.0622	0.1243	0	0	0.1243	0	0	0	0	0.0622	0.1243	0	0.3107	0	0.1864	0	0	0	0	0.0622	0
OG0000572	0	0.1857	0	0.1857	0	0	0	0.4952	0	0.0619	0.1238	0	0	0.1238	0	0	0	0.1238	0.0619	0.1238	0	0.3095	0	0.1857	0	0	0	0	0.0619	0
OG0000573	0	0.1843	0	0.1843	0	0.1229	0	0.4915	0	0.0615	0.1229	0	0	0.1229	0	0	0	0.1229	0.0615	0.1229	0	0.3072	0	0.1843	0	0	0.1229	0	0.0615	0
OG0000574	0	0.1857	0	0.1857	0	0	0.1238	0.4952	0	0.0619	0.1238	0	0	0.1238	0	0	0	0	0.0619	0.1238	0	0.3095	0	0.1857	0	0	0	0	0.0619	0
OG0000575	0	0.1857	0	0.1857	0	0	0.1238	0.4952	0	0.0619	0.1238	0	0	0.1238	0	0	0	0	0.0619	0.1238	0	0.3095	0	0.1857	0	0	0	0	0.0619	0
OG0000576	0	0.1823	0	0.1823	0	0	0.1215	0.486	0.1215	0.0608	0.1215	0	0	0.1215	0	0	0	0	0.0608	0.1215	0	0.3038	0	0.1823	0	0.1215	0.1215	0	0.1822	0
OG0000577	0	0.1836	0	0.1836	0	0	0.1224	0.4896	0	0.0612	0.1224	0	0.1224	0.1224	0	0	0	0	0.0612	0.1224	0	0.306	0	0.1836	0	0	0.1224	0.1224	-0.0612	0
OG0000578	0	0.1809	0	0.1809	0	0	0	0.4824	0.1206	0.0603	0.1206	0	0	0.1206	0	0	0	0	0.0603	0.1206	0	0.3015	0	0.3015	0	0	0	0	0.1809	0.1206
OG0000579	0	0.1843	0	0.1843	0	0	0.1229	0.4915	0.1229	0.0615	0.1229	0	0	0.1229	0	0	0	0	0.0615	0.1229	0	0.3072	0	0.1843	0	0	0.1229	0	0.0615	0
OG0000580	0	0.1829	0	0.1829	0	0	0.1219	0.4877	0	0.0609	0.1219	0	0	0.1219	0	0	0	0	0.0609	0.1219	0	0.4268	0	-0.061	0	0	0	0	0.0609	0
OG0000581	0	0.1843	0	0.1843	0	0	0.1229	0.4915	0	0.0615	0.1229	0	0	0.1229	0	0	0	0.1229	0.0615	0.1229	0	0.3072	0	0.1843	0	0	0.1229	0	0.0615	0
OG0000582	0	0.1843	0	0.1843	0	0	0.1229	0.4915	0	0.0615	0.1229	0	0	0.1229	0	0	0	0.1229	0.0615	0.1229	0	0.3072	0.1229	0.1843	0	0	0	0	0.0615	0
OG0000583	0	0.1843	0	0.1843	0	0	0.1229	0.4915	0	0.0615	0.1229	0	0	0.1229	0	0	0	0.1229	0.0615	0.1229	0	0.3072	0	0.1843	0	0	0.1229	0	0.0615	0
OG0000584	0	0.185	0	0.185	0	0	0.1233	0.4933	0	0.0616	0	0	0	0.1233	0	0	0	0.1233	0.0616	0.1233	0	0.3083	0	0.185	0	0	0.1233	0	0.0616	0
OG0000585	0	0.185	0	0.185	0	0	0	0.4933	0	0.0616	0.1233	0	0	0.1233	0	0	0	0.1233	0.0616	0.1233	0	0.3083	0	0.185	0	0	0.1233	0	0.0616	0
OG0000586	0	0.1864	0	0.1864	0	0	0	0.4971	0	0.0622	0	0	0	0.1243	0	0	0	0.1243	0.0622	0.1243	0	0.3107	0	0.1864	0	0	0	0	0.0622	0
OG0000587	0	0.185	0	0.185	0	0	0	0.4933	0	0.0616	0.1233	0	0	0.1233	0	0	0	0.1233	0.0616	0.1233	0	0.3083	0	0.185	0	0	-0.1233	0	0.0616	0
OG0000588	0	0.1836	0	0.1836	0	0	0	0.4896	0	0.0612	0.1224	0	0	0.1224	0	0	0	0	0.0612	0.1224	0	0.306	0	0.1836	0	0	0.2448	0	0.0612	0
OG0000589	0	0.1857	0	0.1857	0	0	0	0.4952	0	0.0619	0.1238	0	0	0.1238	0	0	0	0.1238	0.0619	0.1238	0	0.3095	0	0.1857	0	0	0	0	0.0619	0
OG0000590	0	0.1864	0	0.1864	0	0	0	0.4971	0	0.0622	0.1243	0	0	0.1243	0	0	0	0	0.0622	0.1243	0	0.3107	0	0.1864	0	0	0	0	0.0622	0
OG0000591	0	0.1823	0.1215	0.1823	0	0.1215	0	0.486	0	0.0608	0.243	0	0	0.1215	0	0	0	0	0.0608	0.1215	0	0.3038	0	0.1823	0	0	0	0.1215	0.0608	0
OG0000592	0	0.1843	0	0.1843	0	0.1229	0	0.4915	0.1229	0.0615	0.1229	0	0	0.1229	0	0	0	0	0.0615	0.1229	0	0.3072	0	0.1843	0	0	0	0.1229	0.0615	0
OG0000593	0	0.1864	0	0.0621	0	0	0	0.4971	0	0.0622	0.1243	0	0	0.1243	0.1243	0	0	0	0.0622	0.1243	0	0.3107	0	0.1864	0	0.1243	0	0	0.0622	0
OG0000594	0	0.1843	0.1229	0.1843	0	0	0.1229	0.4915	0	0.0615	0.1229	0	0	0.1229	0	0	0	0	0.0615	0.1229	0	0.3072	0	0.1843	0	0	0	0.1229	0.0615	0
OG0000595	0.1229	0.0614	0	0.1843	0	0	0.1229	0.4915	0	0.0615	0.1229	0.1229	0.1229	0.1229	0	0	0	0	0.0615	0.1229	0	0.3072	0	0.1843	0	0	0.1229	0	0.0615	0
OG0000596	0	0.1843	0	0.1843	0	0	0.1229	0.4915	0	0.0615	0.1229	0	0.1229	0.1229	0.1229	0	0	0	0.0615	0.1229	0	0.3072	0	0.1843	0	0	0	0	0.0615	0
OG0000597	0	0.1857	0	0.1857	0	0	0	0.4952	0	0.0619	0.1238	0	0	0.1238	0	0	0	0	0.0619	0.1238	0	0.3095	0	0.1857	0	0	0.1238	0	0.0619	0
OG0000598	0	0.1843	0	0.1843	0	0.1229	0.1229	0.4915	0.1229	0.0615	0.1229	0	0	0.1229	0	0	0	0	0.0615	0.1229	0	0.3072	0	0.0614	0	0	0.1229	0.1229	0.0615	0
OG0000599	0	-0.0617	0	0.185	0	0	0.1233	0.4933	0	0.0616	0.1233	0	0	0.1233	0	0	0.1233	0.1233	0.0616	0.1233	0	0.3083	0	0.185	0	0	0.1233	0	0.0616	0
OG0000600	0	0.1857	0	0.1857	0	0.1238	0	0.4952	0	0.0619	0.1238	0	0	0.1238	0	0	0	0	0.0619	0.1238	0	0.3095	0	0.1857	0	0	0	0	0.0619	0
OG0000601	0	0.1843	0	0.1843	0	0	0	0.4915	0	0.0615	0.2457	0	0	0.1229	0	0	0	0	0.0615	0.1229	0	0.3072	0	0.1843	0	0	0	0	0.0615	0
OG0000602	0	0.1843	0	0.1843	0	0	0	0.4915	0	0.0615	0.1229	0	0	0.1229	0	0	0	0	0.0615	0.1229	0	0.3072	0	0.1843	0	0	0.1229	0	0.1843	0
OG0000603	0	0.1829	0	0.1829	0	0	0	0.4877	0.1219	0.0609	0.1219	0	0	0.1219	0	0	0	0	0.0609	0.1219	0	0.3048	0	0.1829	0	0	0.2439	0	0.0609	0
OG0000604	0	0.1809	0	0.1809	0	0	0	0.4824	0	0.0603	0.1206	0.1206	0	0.1206	0	0	0	0.1206	0.0603	0.1206	0	0.4221	0	0.1809	0	0	0	0	0.0603	0
OG0000605	0	0.1857	0	0.1857	0	0	0	0.4952	0.1238	0.0619	0.1238	0	0	0.1238	0	0	0	0	0.0619	0.1238	0	0.3095	0	0.1857	0	0	0	0	0.0619	0
OG0000606	0	0.1829	0	0.1829	0	0	0.1219	0.4877	0.1219	0.0609	0.1219	0	0	0.1219	0	0	0	0.1219	0.0609	0.1219	0	0.3048	0	0.1829	0	0	0.1219	0.1219	0.0609	0
OG0000607	0	0.1857	0	0.1857	0	0	0.1238	0.4952	0	0.0619	0.1238	0	0	0.1238	0	0	0	0	0.0619	0.1238	0	0.3095	0	0.1857	0	0	0	0	0.0619	0
OG0000608	0	0.1857	0	0.1857	0	0.1238	0	0.4952	0	0.0619	0.1238	0	0	0.1238	0	0	0	0	0.0619	0.1238	0	0.3095	0	0.1857	0	0	0	0	0.0619	0
OG0000609	0	0.1857	0	0.1857	0	0	0	0.4952	0	0.0619	0.1238	0.1238	0	0.1238	0	0	0	0	0.0619	0.1238	0	0.3095	0	0.1857	0	0	0	0	0.0619	0
OG0000610	0	0.185	0	0.185	0	0	0.1233	0.4933	0	0.0616	0.1233	0	0	0.1233	0	0	0	0	0.0616	0.1233	0	0.3083	0	0.185	0	0	0.1233	0	0.0616	0
OG0000611	0	0.1843	0	0.1843	0	0	0.1229	0.4915	0	0.0615	0.1229	0	0	0.1229	0	0	0	0.1229	0.0615	0.1229	0	0.3072	0	0.1843	0	0	-0.1229	0	0.0615	0
OG0000612	0	0.1829	0	0.1829	0	0	0	0.4877	0.1219	0.0609	0.2439	0	0	0.1219	0	0	0	0	0.0609	0.1219	0	0.3048	0	0.1829	0	0	0.1219	0	0.0609	0
OG0000613	0	0.1802	0	0.1802	0	0	0.1202	0.4807	0.1202	0.0601	0.1202	0	0	0.1202	0	0	0	0	0.0601	0.1202	0	0.4206	0	0.1802	0	0	0.1202	0	0.0601	0
OG0000614	0	0.1829	0.1219	0.1829	0	0	0.1219	0.4877	0	0.0609	0.1219	0	0	0.1219	0	0	0	0	0.1829	0.1219	0	0.3048	0	0.1829	0	0	0.1219	0	0.0609	0
OG0000615	0.1229	0.1843	0	0.1843	0	0	0.1229	0.4915	0	0.0615	0.1229	0	0	0.1229	0	0	0	0	0.0615	0.1229	0	0.3072	0	0.1843	0	0	0.1229	0	0.0615	0
OG0000616	0	0.1836	0.1224	0.1836	0	0	0	0.4896	0.1224	0.0612	0.1224	0	0	0.1224	0	0	0	0	0.0612	0.1224	0	0.306	0	0.1836	0	0.1224	0.1224	0	0.0612	0
OG0000617	0	0.1823	0.1215	0.1823	0	0	0.1215	0.486	0	0.0608	0.1215	0	0	0.1215	0	0	0	0	0.0608	0.1215	0	0.3038	0	0.1823	0	0	0.243	0	0.0608	0
OG0000618	0	0.185	0.1233	0.185	0	0	0.1233	0.4933	0	0.0616	0	0	0	0.1233	0	0	0	0	0.0616	0.1233	0	0.3083	0	0.185	0	0	0.1233	0	0.0616	0
OG0000619	0	0.1965	0.131	0.1965	0	0	0	0.1311	0	0.0655	0.131	0	0	0.131	0	0	0	0	0.0655	0.131	0	0.3276	0	0.1965	0	0	0	0.131	0.0655	0
OG0000620	0	0.1864	0	0.1864	0	0	0	0.4971	0	0.0622	0.1243	0	0	0.1243	0	0	0	0	0.0622	0.1243	0	0.3107	0	0.1864	0	0	0	0	0.0622	0
OG0000621	0	0.185	0	0.185	0	0	0	0.4933	0	0.0616	0.1233	0	0.1233	0.1233	0	0	0	0	0.0616	0.1233	0	0.3083	0	0.185	0	0	0	0.1233	0.0616	0
OG0000622	0	0.185	0	0.185	0	0	0	0.4933	0	0.0616	0.1233	0	0	0.1233	0.1233	0	0	0.1233	0.0616	0.1233	0	0.3083	0	0.185	0	0	0	0	0.0616	0
OG0000623	0	0.185	0	0.185	0	0	0	0.4933	0	0.0616	0.1233	0	0	0.1233	0	0	0	0	0.185	0.1233	0	0.3083	0	0.185	0	0	0	0	0.0616	0
OG0000624	0	0.1843	0	0.1843	0	0	0	0.4915	0	0.0615	0.1229	0	0.1229	0.1229	0	0	0	0	0.0615	0.1229	0.1229	0.3072	0	0.1843	0	0	0	0.1229	0.0615	0
OG0000625	0	0.1864	0	0.1864	0	0	0	0.4971	0	0.0622	0.1243	0	0	0.1243	0	0	0	0	0.0622	0.1243	0	0.3107	0	0.1864	0	0	0	0	0.0622	0
OG0000626	0.1233	0.185	0	0.185	0	0	0	0.4933	0	0.0616	0.1233	0	0	0.1233	0	0	0	0.1233	0.0616	0.1233	0	0.3083	0	0.185	0	0	0	0	0.0616	0
OG0000627	0.1229	0.1843	0	0.1843	0	0.1229	0.1229	0.4915	0	0.0615	0.1229	0	0	0.1229	0	0	0	0	0.0615	0.1229	0	0.3072	0	0.1843	0	0	0	0	0.0615	0
OG0000628	0.1233	0.185	0	0.185	0	0	0	0.4933	0	0.0616	0.1233	0	0	0.1233	0	0	0	0.1233	0.0616	0.1233	0	0.3083	0	0.185	0	0	0	0	0.0616	0
OG0000629	0	0.1816	0	0.1816	0	0	0.121	0.4842	0	0.0605	0	0	0	0.1211	0	0	0	0	0.0605	0.1211	0	0.4237	0	0.1816	0.121	0	0	0	0.0605	0
OG0000630	0	0.1857	0	0.1857	0	0	0.1238	0.4952	0	0.0619	0.1238	0	0	0.1238	0	0	0	0	0.0619	0.1238	0	0.3095	0	0.1857	0	0	0	0	0.0619	0
OG0000631	0	0.185	0	0.185	0	0	0	0.4933	0	0.0616	0.1233	0	0	0.1233	0	0	0	0	0.0616	0.1233	0	0.3083	0	0.185	0	0	0.1233	0	0.0616	0.1233
OG0000632	0	0.1843	0	0.1843	0	0	0	0.4915	0.1229	0.0615	0.1229	0	0	0.1229	0	0	0	0	0.0615	0.1229	0	0.3072	0	0.1843	0	0	-0.1229	0	0.0615	0.1229
OG0000633	0	0.0619	0	0.1857	0	0	0	0.4952	0.1238	0.0619	0.1238	0	0	0.1238	0	0	0	0	0.0619	0.1238	0	0.3095	0	0.1857	0	0	0.1238	0	0.0619	0.1238
OG0000634	0	0.1857	0	0.1857	0	0	0	0.4952	0	0.0619	0.1238	0	0	0.1238	0	0	0	0	0.0619	0.1238	0	0.3095	0	0.1857	0	0	0	0	0.0619	0.1238
OG0000635	0	0.1901	0	0.1901	0	0	0	0.507	0	0.0633	0.1267	0	0	0.1267	0	0	0	0	0.0633	0.1267	0	0.1902	0	0.0634	0	0	0.1267	0	0.0633	0
OG0000636	0	0.1765	0	0.2941	0	0	0	0.4706	0	0.0588	0.1177	0.1176	0	0.1177	0	0	0	0	0.0588	0.1177	0	0.4118	0	0.2941	0	0	0	0	0.0588	0
OG0000637	0	0.1864	0	0.1864	0	0	0	0.4971	0	0.0622	0.1243	0	0	0.1243	0	0	0	0	0.0622	0.1243	0	0.3107	0	0.1864	0	0	0	0	0.0622	0
OG0000638	0	0.1836	0	0.306	0	0	0	0.4896	0	0.0612	0.1224	0	0	0.1224	0	0	0	0	0.0612	0.1224	0	0.306	0	0.1836	0	0	0	0	0.0612	0
OG0000639	0	0.1816	0	0.3026	0	0	0.121	0.4842	0	0.1816	0.1211	0	0	0.1211	0	0	0	0	0.0605	0.1211	0	0.3026	0	0.1816	0	0	0	0	0.0605	0
OG0000640	0	0.1836	0	0.1836	0	0	0.1224	0.4896	0	0.1836	0.1224	0	0	0.1224	0	0	0	0	0.0612	0.1224	0	0.306	0	0.1836	0	0	0.1224	0	0.0612	0
OG0000641	0	0.1857	0	0.1857	0	0	0.1238	0.4952	0	0.0619	0.1238	0	0	0.1238	0	0	0	0	0.0619	0.1238	0	-0.1857	0	0.1857	0	0	0.2476	0	0.0619	0
OG0000642	0	0.1843	0	0.1843	0	0	0.1229	0.4915	0	0.1843	0.1229	0	0	0.1229	0	0	0	0	0.0615	0.1229	0	0.3072	0	0.1843	0	0	0	0	0.0615	0
OG0000643	0	0.185	0	0.185	0	0	0	0.4933	0	0.185	0.1233	0	0	0.1233	0	0	0	0	0.0616	0.1233	0	0.3083	0	0.185	0	0	0	0	0.0616	0
OG0000644	0	0.1843	0	0.1843	0	0	0	0.4915	0	0.1843	0.1229	0	0	0.1229	0	0	0	0	0.0615	0.1229	0	0.3072	0	0.1843	0	0	0	0.1229	0.0615	0
OG0000645	0	0.1864	0	0.1864	0	0	0	0.4971	0	0.0622	0.1243	0	0	0.1243	0	0	0	0	0.0622	0.1243	0	0.3107	0	0.1864	0	0	0	0	0.0622	0
OG0000646	0	0.1836	0	0.1836	0	0	0.1224	0.4896	0	0.0612	0.1224	0	0	0.2448	0	0	0	0	0.0612	0.1224	0	0.306	0	0.1836	0	0	0	0	0.0612	0
OG0000647	0.1238	0.1857	0	0.1857	0	0	0	0.4952	0	0.0619	0.1238	0	0	0	0	0	0	0	0.0619	0.1238	0	0.3095	0	0.1857	0	0	0.1238	0	0.0619	0
OG0000648	0.1233	0.185	0	0.185	0	0	0.1233	0.4933	0	0.0616	0.1233	0	0	0.1233	0	0	0	0	0.0616	0.1233	0	0.3083	0	0.185	0	0	0	0	0.0616	0
OG0000649	0	0.1829	0	0.1829	0	0	0	0.4877	0	0.0609	0.1219	0	0	0.1219	0	0	0	0	0.0609	0.2439	0	0.3048	0	0.1829	0	0	0.1219	0.1219	0.0609	0
OG0000650	0	0.1829	0	0.1829	0	0	0.1219	0.4877	0	0.0609	0.1219	0	0	0.1219	0	0	0	0	0.0609	0.1219	0	0.3048	0	0.1829	0	0	0.2439	0	0.0609	0
OG0000651	0	0.1843	0	0.1843	0	0	0.1229	0.4915	0	0.0615	0.1229	0	0	0.1229	0	0	0	0	0.0615	0.1229	0	0.3072	0	0.1843	0	0	0	0	0.1843	0
OG0000652	0	0.1857	0	0.1857	0	0	0	0.4952	0	0.0619	0.1238	0	0	0.1238	0	0	0	0	0.0619	0.1238	0	0.3095	0	0.1857	0	0	0.1238	0	0.0619	0
OG0000653	0	0.1857	0	0.1857	0	0	0	0.4952	0	0.0619	0.1238	0	0	0.1238	0	0	0	0	0.0619	0.1238	0	0.3095	0	0.1857	0	0	0.1238	0	0.0619	0
OG0000654	0	0.1802	0	0.1802	0	0	0	0.6008	0	0.0601	0.1202	0	0	0.1202	0	0	0	0	0.0601	0.1202	0	0.3004	0	0.1802	0	0	0	0	0.0601	0
OG0000655	0	0.185	0	0.185	0.1233	0	0	0.4933	0	0.0616	0.1233	0	0	0.1233	0	0	0.1233	0	0.0616	0.1233	0	0.3083	0	0.185	0	0	0	0	0.0616	0
OG0000656	0	0.1823	0	0.3037	0	0	0.1215	0.486	0	0.0608	0.1215	0	0	0.1215	0	0	0	0	0.0608	0.1215	0	0.3038	0	0.1823	0	0	0.1215	0	0.0608	0
OG0000657	0	0.1857	0	0.1857	0	0	0.1238	0.4952	0	0.0619	0.1238	0	0	0.1238	0	0	0	0	0.0619	0.1238	0	0.3095	0	0.1857	0	0	0	0	0.0619	0
OG0000658	0	0.1823	0	0.1823	0	0	0.1215	0.486	0	0.0608	0.243	0	0	0.1215	0.1215	0	0	0	0.0608	0.1215	0	0.3038	0	0.1823	0	0	0	0.1215	0.0608	0
OG0000659	0	0.1843	0	0.1843	0	0	0	0.4915	0	0.0615	0.1229	0	0	0.1229	0	0	0	0	0.0615	0.2457	0	0.3072	0	0.1843	0	0	0	0	0.0615	0
OG0000660	0	0.1894	0	0.1894	0	0	0	0.505	0	0.0631	0.1263	0	0	0.1263	0	0	0	0	0.0631	0.1263	0	0.1894	0	0.1894	0	0	0	0	0.0631	0
OG0000661	0	0.1871	0	0.1871	0	0	0	0.499	0	0.0624	0.1247	0	0	0.1247	0	0	0	0.1248	0.0624	0.1247	0.1248	0.1871	0	0.1871	0	0	0.1247	0	0.0624	0
OG0000662	0	0.1871	0	0.1871	0	0	0.1248	0.3742	0	0.0624	0.1247	0	0.1248	0.1247	0	0	0	0.1248	0.0624	0.1247	0.1248	0.3119	0	0.1871	0	0.1248	0.1247	0	0.0624	0
OG0000663	0	0.185	0.1233	0.185	0	0	0	0.4933	0	0.0616	0.1233	0	0	0.1233	0	0	0	0	0.0616	0.1233	0	0.3083	0	0.185	0	0.1233	0	0	0.0616	0
OG0000664	0	0.185	0	0.185	0	0	0	0.4933	0.1233	0.0616	0.1233	0	0	0.1233	0	0	0	0.1233	0.0616	0.1233	0	0.3083	0	0.185	0	0	0	0	0.0616	0
OG0000665	0	0.1843	0	0.1843	0	0	0.1229	0.4915	0.1229	0.0615	0.1229	0	0	0.1229	0	0	0	0.1229	0.0615	0.1229	0	0.3072	0	0.1843	0	0	0	0	0.0615	0
OG0000666	0	0.1843	0.1229	0.1843	0	0	0	0.4915	0.1229	0.0615	0.1229	0	0	0.1229	0	0	0	0	0.0615	0.1229	0	0.3072	0	0.1843	0	0.1229	0	0	0.0615	0
OG0000667	0	0.1836	0	0.1836	0	0	0.1224	0.4896	0.1224	0.1836	0.1224	0	0	0.1224	0	0	0	0	0.0612	0.1224	0	0.306	0	0.1836	0	0	0	0	0.0612	0
OG0000668	0	0.1857	0	0.1857	0	0	0.1238	0.4952	0	0.0619	0.1238	0	0	0.1238	0	0	0	0	0.0619	0.1238	0	0.3095	0	0.1857	0	0	0	0	0.0619	0
OG0000669	0	0.1843	0	0.1843	0	0	0.1229	0.4915	0	0.0615	0.1229	0	0	0.1229	0	0	0	0	0.0615	0.1229	0.1229	0.3072	0	0.1843	0	0.1229	0	0	0.0615	0
OG0000670	0	0.1843	0	0.1843	0	0	0.1229	0.4915	0	0.0615	0.1229	0	0	0.1229	0	0	0	0	0.0615	0.1229	0	0.3072	0	0.1843	0	0.1229	0.1229	0	0.0615	0
OG0000671	0	0.185	0	0.185	0	0	0.1233	0.4933	0	0.0616	0.1233	0	0	0.1233	0	0	0	0	0.0616	0.1233	0	0.3083	0	0.185	0	0	0.1233	0	0.0616	0
OG0000672	0	0.1879	0	0.1879	0	0	0	0.501	0	0.0626	0.1253	0	0	0.1253	0	0	0	0	0.0626	0.1253	0	0.3131	0	0.0627	0	0	0	0	0.0626	0
OG0000673	0	0.1843	0	0.1843	0	0	0.1229	0.4915	0	0.1843	0.1229	0	0	0.1229	0	0	0	0	0.0615	0.1229	0	0.3072	0	0.1843	0	0	0	0	0.0615	0
OG0000674	0	0.1829	0	0.1829	0	0	0.1219	0.4877	0	0.1829	0.1219	0	0	0.1219	0	0.1219	0	0	0.0609	0.1219	0	0.3048	0	0.1829	0	0	0.1219	0	0.0609	0
OG0000675	0	0.1843	0	0.1843	0	0	0	0.4915	0	0.1843	0.1229	0	0	0.1229	0	0	0	0	0.0615	0.1229	0	0.3072	0	0.1843	0	0	0.1229	0	0.0615	0
OG0000676	0	0.1836	0	0.1836	0	0	0	0.4896	0	0.0612	0.2448	0	0.1224	0.1224	0	0	0	0	0.0612	0.1224	0	0.306	0	0.1836	0	0	0	0	0.0612	0
OG0000677	0	0.1864	0	0.1864	0	0	0	0.4971	0	0.0622	0.1243	0	0	0.1243	0	0	0	0	0.0622	0.1243	0	0.3107	0	0.1864	0	0	0	0	0.0622	0
OG0000678	0	0.1879	0	0.1879	0	0	0	0.501	0	0.0626	0.1253	0	0	0.1253	0	0	0	0	0.0626	0.1253	0	0.1879	0	0.1879	0	0	-0.1253	0.1252	0.0626	0
OG0000679	0	0.189	0	0.189	0	0	0	0.5039	0	0.063	0.126	0	0	0.126	0	0.126	0	0.126	0.063	0.126	0	0.252	0	0.189	0	0	0	0	0.063	0
OG0000680	0	0.1905	0	0.1905	0	0	0	0.508	0	0.0635	0.127	0	0	0.127	0	0	0	0	0.0635	0.127	0	0.254	0	0.1905	0	0	0	0	0.0635	0
OG0000681	0	0.189	0	0.189	0	0.126	0	0.5039	0	0.063	0.126	0	0	0.126	0	0	0	0	0.063	0.126	0	0.252	0	0.189	0	0	0	0.126	0.063	0
OG0000682	0	0.1905	0	0.1905	0	0	0	0.508	0	0.0635	0.127	0	0	0.127	0	0	0	0	0.0635	0.127	0	0.254	0	0.1905	0	0	0	0	0.0635	0
OG0000683	0	0.1861	0	0.1861	0	0	0.124	0.4962	0	0.062	0.2481	0	0	0.1241	0	0	0	0	0.062	0.1241	0	0.2481	0	0.1861	0	0	0	0	0.1861	0
OG0000684	0	0.1853	0	0.1853	0	0	0.1236	0.4942	0	0.0618	0.1235	0	0	0.1235	0	0	0	0	0.0618	0.1235	0	0.3707	0	0.1853	0	0	-0.1235	0	0.0618	0
OG0000685	0	0.1905	0	0.1905	0	0	0	0.508	0	0.0635	0.127	0	0	0.127	0	0	0	0	0.0635	0.127	0	0.254	0	0.1905	0	0	0	0	0.0635	0
OG0000686	0	0.1898	0	0.1898	0	0.1265	0	0.506	0	0.0633	0.1265	0	0	0.1265	0	0	0	0	0.0633	0.1265	0	0.253	0	0.1898	0	0	0	0	0.0633	0
OG0000687	0	0.1898	0	0.1898	0	0	0	0.506	0	0.0633	0.1265	0	0	0.1265	0	0	0	0	0.0633	0.1265	0.1265	0.253	0	0.1898	0	0	0	0	0.0633	0
OG0000688	0	0.184	0	0.184	0	0.1226	0.1226	0.4905	0	0.0613	0.1226	0	0	0.1226	0	0	0	0	0.0613	0.1226	0.1226	0.3679	0	0.184	0	0	-0.1226	0	-0.0613	0
OG0000689	0	0.1861	0	0.1861	0	0.124	0.124	0.4962	0	0.062	0.1241	0	0	0.1241	0	0	0	0	0.062	0.1241	0.124	0.2481	0	0.1861	0	0	-0.1241	0	0.1861	0
OG0000690	0	0.189	0	0.189	0	0	0	0.5039	0	0.063	0.126	0	0	0.126	0	0	0	0	0.063	0.126	0.126	0.252	0	0.189	0	0	-0.126	0	0.063	0
OG0000691	0	0.1883	0	0.1883	0	0	0.1255	0.502	0	0.0628	0.1255	0	0	0.1255	0	0	0	0.1255	0.0628	0.1255	0	0.251	0	0.1883	0	0	-0.1255	0	0.0628	0
OG0000692	0.1231	0.1847	0	0.3077	0	0	0	0.4924	0	0.0616	0.1231	0	0	0.1231	0	0	0	0.1231	0.0616	0.1231	0	0.2462	0	0.1847	0	0	-0.1231	0.1231	0.0616	0
OG0000693	0	0.1898	0	0.1898	0	0	0	0.506	0	0.0633	0.1265	0	0	0.1265	0	0	0	0	0.0633	0.1265	0	0.253	0	0.1898	0	0	-0.1265	0	0.0633	0
OG0000694	0	0.189	0	0.189	0	0	0	0.5039	0	0.063	0.126	0	0	0.126	0.126	0	0	0	0.063	0.126	0	0.252	0	0.189	0	0	-0.126	0	0.063	0
OG0000695	0	0.1853	0	0.1853	0	0	0	0.4942	0	0.0618	0.1235	0	0	0.1235	0.1236	0	0	0	0.0618	0.1235	0	0.2471	0.1236	0.1853	0	0	-0.2471	0	0.0618	0.1236
OG0000696	0	0.1847	0	0.1847	0	0	0.1231	0.4924	0	0.0616	0.1231	0	0	0.1231	0.1231	0	0	0	0.0616	0.1231	0	0.2462	0	0.1847	0	0	-0.2462	0	0.1846	0
OG0000697	0	0.1861	0	0.1861	0	0	0	0.4962	0	0.062	0.1241	0	0	0.1241	0	0	0	0	0.062	0.1241	0	0.2481	0	0.1861	0	0	-0.2481	0	0.1861	0
OG0000698	0	0.1861	0	0.1861	0	0	0.124	0.4962	0	0.062	0.1241	0	0	0.1241	0	0	0	0	0.062	0.1241	0.124	0.2481	0	0.1861	0	0	-0.2481	0	0.062	0
OG0000699	0	0.1867	0	0.1867	0	0	0.1245	0.498	0	0.0622	0.1245	0	0	0.1245	0	0	0	0	0.0622	0.1245	0	0.249	0	0.1867	0	0	-0.249	0	0.0622	0
OG0000700	0	0.1847	0	0.1847	0	0	0	0.4924	0	0.0616	0.2462	0	0	0.1231	0	0	0	0	0.0616	0.1231	0	0.2462	0	0.1847	0	0	-0.2462	0.1231	0.0616	0
OG0000701	0	0.1875	0	0.1875	0	0	0	0.5	0	0.0625	0.125	0	0	0	0	0.125	0	0	0.0625	0.125	0	0.25	0	0.1875	0	0	-0.25	0	0.0625	0
OG0000702	0	0.184	0	0.184	0	0	0	0.4905	0	0.0613	0.1226	0	0	0.1226	0	0	0	0.1226	0.0613	0.2453	0	0.2453	0	0.184	0	0.1226	-0.2453	0	0.0613	0
OG0000703	0	0.1883	0	0.1883	0	0	0	0.502	0	0.0628	0.1255	0	0	0	0	0	0	0	0.0628	0.1255	0	0.251	0	0.1883	0	0	-0.251	0	0.0628	0
OG0000704	0	0.1853	0	0.1853	0	0	0	0.4942	0	0.0618	0.2471	0	0	-0.1235	0	0	0	0	0.0618	0.1235	0	0.2471	0	0.1853	0	0	-0.2471	0	0.0618	0
OG0000705	0	0.184	0	0.3066	0	0	0.1226	0.4905	0	0.0613	0.1226	0	0	0.1226	0	0	0	0	0.0613	0.1226	0	0.2453	0	0.184	0	0	-0.2453	0	0.0613	0
OG0000706	0.1245	0.1867	0	0.1867	0	0	0	0.498	0	0.0622	0.1245	0	0	0.1245	0	0	0	0	0.0622	0.1245	0	0.249	0	0.1867	0	0	-0.249	0	0.0622	0
OG0000707	0	0.184	0	0.184	0	0	0.1226	0.4905	0	0.1839	0.1226	0	0	0.1226	0.1226	0	0	0	0.0613	0.1226	0	0.2453	0	0.184	0	0.1226	-0.2453	0	0.0613	0
OG0000708	0	0.1861	0	0.1861	0	0	0.124	0.4962	0	0.062	0.1241	0	0.124	0.1241	0	0	0	0	0.062	0.1241	0	0.2481	0	0.1861	0	0	-0.2481	0	0.062	0
OG0000709	0	0.1875	0	0.1875	0	0	0	0.5	0	0.0625	0.125	0	0	0.125	0	0	0	0	0.0625	0.125	0	0.25	0	0.1875	0	0	-0.25	0	0.0625	0
OG0000710	0	0.1928	0	0.1928	0	0	0	0.3857	0	0.0643	0.1285	0	0	0.1285	0	0	0	0	0.0643	0.1285	0	0.2571	0	0.1928	0	0	-0.2571	0	0.0643	0
OG0000711	0	0.1921	0	0.1921	0	0	0.128	0.3841	0	0.064	0.1281	0	0	0.1281	0	0	0	0	0.064	0.1281	0	0.2561	0	0.1921	0	0	-0.2561	0	0.064	0
OG0000712	0	0.1945	0	0.1945	0	0	0	0.1296	0	0.0648	0.1297	0	0	0.1297	0	0	0	0	0.0648	0.1297	0	0.3889	0	0.1945	0	0	-0.2593	0.1296	0.0648	0
OG0000713	0	0.1806	0	0.1806	0	0	0.1204	0.6019	0	0.0602	0.1204	0	0	0.1204	0	0	0	0	0.0602	0.1204	0	0.2408	0	0.1806	0	0	-0.2408	0	0.0602	0
OG0000714	0	0.1991	0	0.1991	0	0	0	0.3319	0	0.0663	0.1327	0	0	0.1327	0	0	0	0	0.0663	0.1327	0	0.2655	0	0.1991	0	0	-0.2655	0	0.0663	0
OG0000715	0	0.194	0	0.194	0	0	0	0.4528	0	0.0647	0.1294	0	0	0.1294	0	0	0	0	0.0647	0.1294	0	0.2587	0	0.194	0	0	-0.2587	0	0.0647	0
OG0000716	0	0.194	0	0.194	0	0	0	0.4528	0	0.0647	0.1294	0	0	0.1294	0	0	0	0	0.0647	0.1294	0	0.2587	0	0.194	0	0	-0.2587	0	0.0647	0
OG0000717	0	0.194	0	0.194	0	0	0	0.4528	0	0.0647	0.1294	0	0	0.1294	0	0	0	0	0.0647	0.1294	0	0.2587	0	0.194	0	0	-0.2587	0	0.0647	0
OG0000718	0	0.1933	0	0.1933	0	0	0.1288	0.4509	0	0.0644	0	0	0	0.1288	0.1288	0	0	0	0.0644	0.1288	0	0.2577	0	0.1933	0	0	-0.2577	0	0.0644	0
OG0000719	0	0.1933	0	0.1933	0	0	0	0.4509	0	0.0644	0.1288	0	0	0.1288	0	0	0	0	0.0644	0.1288	0.1288	0.2577	0	0.1933	0	0	-0.2577	0	0.0644	0
OG0000720	0	0.1933	0	0.1933	0	0	0	0.4509	0	0.0644	0.1288	0	0	0.1288	0	0.1288	0	0	0.0644	0.1288	0	0.2577	0	0.1933	0	0	-0.2577	0	0.0644	0
OG0000721	0	0.1864	0	0.1864	0	0	0	0.5592	0	0.0622	0.1243	0	0	0.1243	0	0	0	0	0.1864	0.1243	0	0.2486	0	0.1864	0	0	-0.2485	0	0.0622	0
OG0000722	0	0.194	0	0.194	0	0	0	0.4528	0	0.0647	0.1294	0	0	0.1294	0	0	0	0	0.0647	0.1294	0	0.2587	0	0.194	0	0	-0.2587	0	0.0647	0
OG0000723	0	0.1909	0	0.3181	0	0	0	0.4454	0	0.0637	0.1273	0	0	0.1273	0	0	0	0	0.0637	0.1273	0	0.2545	0	0.1909	0	0	-0.2545	0	0.0637	0
OG0000724	0	0.194	0	0.194	0	0	0	0.4528	0	0.0647	0.1294	0	0	0.1294	0	0	0	0	0.0647	0.1294	0	0.2587	0	0.194	0	0	-0.2587	0	0.0647	0
OG0000725	0	0.1901	0	0.1901	0	0	0	0.4436	0	0.0633	0.1267	0	0	0.1267	0	0	0	0	0.0633	0.1267	0	0.3802	0	0.1901	0	0	-0.2535	0	0.0633	0
OG0000726	0	0.1924	0	0.1924	0	0	0	0.449	0	0.0641	0.1283	0	0	0.1283	0	0	0	0	0.0641	0.1283	0	0.2566	0	0.1924	0	0	-0.2566	0	0.1925	0
OG0000727	0	0.1933	0	0.1933	0	0	0	0.4509	0	0.0644	0.1288	0	0	0.1288	0	0.1288	0	0	0.0644	0.1288	0	0.2577	0	0.1933	0	0	-0.2577	0	0.0644	0
OG0000728	0	0.194	0	0.194	0	0	0	0.4528	0	0.0647	0.1294	0	0	0.1294	0	0	0	0	0.0647	0.1294	0	0.2587	0	0.194	0	0	-0.2587	0	0.0647	0
OG0000729	0	0.1933	0	0.1933	0	0	0.1288	0.4509	0	0.0644	0.1288	0	0	0.1288	0	0	0	0	0.0644	0.1288	0	0.2577	0	0.1933	0	0	-0.2577	0	0.0644	0
OG0000730	0	0.1886	0	0.1886	0	0	0	0.4401	0	0.0628	0.2515	0	0	0.1257	0	0	0	0	0.0628	0.1257	0	0.2514	0	0.3143	0	0	-0.2515	0	0.0628	0
OG0000731	0	0.1948	0	0.065	0	0	0	0.4547	0	0.0649	0.1299	0	0	0.1299	0	0	0	0	0.0649	0.1299	0	0.2598	0	-0.1948	0	0	-0.2598	0.1299	0.0649	0
OG0000732	0	0.1933	0	0.1933	0	0	0	0.4509	0	0.0644	0.1288	0	0	0.1288	0	0	0	0	0.0644	0.1288	0	0.2577	0	0.1933	0	0	-0.2577	0.1288	0.0644	0
OG0000733	0	0.1924	0	0.1924	0	0	0.1283	0.449	0	0.0641	0.1283	0	0	0.1283	0	0	0	0	0.0641	0.1283	0	0.2566	0	0.1924	0	0	-0.2566	0.1283	0.0641	0
OG0000734	0	0.1924	0	0.1924	0	0	0.1283	0.449	0	0.0641	0.1283	0	0	0.1283	0	0	0	0	0.0641	0.1283	0	0.2566	0	0.1924	0	0	-0.2566	0.1283	0.0641	0
OG0000735	0	0.1924	0	0.1924	0	0	0.1283	0.449	0	0.0641	0.1283	0	0	0.1283	0	0	0	0	0.0641	0.1283	0	0.2566	0	0.1924	0	0	-0.2566	0.1283	0.0641	0
OG0000736	0	0.1924	0	0.1924	0	0	0.1283	0.449	0	0.0641	0.1283	0	0	0.1283	0	0	0	0	0.0641	0.1283	0	0.2566	0	0.1924	0	0	-0.2566	0.1283	0.0641	0
OG0000737	0	0.1909	0	0.1909	0	0	0	0.4454	0	0.0637	0.1273	0	0	0.1273	0	0	0	0	0.0637	0.1273	0	0.2545	0	0.3181	0	0	-0.2545	0	0.0637	0
OG0000738	0	0.1924	0	0.1924	0	0	0.1283	0.449	0	0.0641	0.1283	0	0	0.1283	0	0	0	0.1283	0.0641	0.1283	0	0.2566	0	0.1924	0	0	-0.2566	0	0.0641	0
OG0000739	0	0.1901	0.1267	0.1901	0	0	0.1267	0.4436	0	0.0633	0.2535	0	0	0.1267	0	0	0	0	0.0633	0.1267	0	0.2535	0	0.1901	0	0	-0.2535	0	0.0633	0
OG0000740	0	0.0636	0	0.1909	0	0	0.1273	0.4454	0	0.0637	0.1273	0	0	0.1273	0	0	0	0	0.0637	0.1273	0	0.3818	0	0.1909	0	0	-0.2545	0	0.0637	0
OG0000741	0	0.1894	0	0.1894	0	0	0	0.4419	0	0.0631	0.2525	0.1262	0	0.1263	0	0	0	0.1262	0.0631	0.1263	0	0.2525	0	0.1894	0	0.1262	-0.2525	0	0.0631	0
OG0000742	0	0.1948	0	0.1948	0	0	0.1299	0.4547	0	0.0649	0.1299	0	0	0.1299	0	0	0	0	0.0649	0.1299	0	0.2598	0	0.065	0	0	-0.2598	0	0.0649	0
OG0000743	0	0.1933	0	0.1933	0	0	0.1288	0.4509	0	0.0644	0.1288	0	0	0.1288	0	0	0	0	0.0644	0.1288	0	0.2577	0	0.1933	0	0	-0.2577	0	0.0644	0
OG0000744	0	0.1894	0	0.1894	0	0	0	0.4419	0.1262	0.0631	0.1263	0	0	0.1263	0	0	0	0	0.0631	0.1263	0	0.3787	0	0.1894	0	0	-0.2525	0	0.0631	0
OG0000745	0	0.1933	0	0.1933	0	0	0.1288	0.4509	0	0.0644	0.1288	0	0	0.1288	0	0	0	0	0.0644	0.1288	0	0.2577	0	0.1933	0	0	-0.2577	0	0.0644	0
OG0000746	0	0.1948	0	0.1948	0	0	0	0.4547	0	0.0649	0.1299	0	0	0	0	0	0	0	0.0649	0.1299	0	0.2598	0	0.1948	0	0	-0.2598	0	0.0649	0
OG0000747	0	0.1924	0	0.1924	0	0	0	0.449	0	0.0641	0.1283	0	0	0.1283	0	0	0	0	0.0641	0.1283	0	0.2566	0	0.1924	0.1283	0.1283	-0.2566	0	0.0641	0
OG0000748	0	0.1933	0	0.1933	0	0	0	0.4509	0	0.0644	0.1288	0.1288	0	0.1288	0	0	0	0	0.0644	0.1288	0	0.2577	0	0.1933	0	0	-0.2577	0	0.0644	0
OG0000749	0	0.1948	0	0.1948	0	0	0	0.4547	0	0.0649	0	0	0	0.1299	0	0	0	0	0.0649	0.1299	0	0.2598	0	0.1948	0	0	-0.2598	0	0.0649	0
OG0000750	0	0.194	0	0.194	0	0	0	0.4528	0	0.0647	0.1294	0	0	0.1294	0	0	0	0	0.0647	0.1294	0	0.2587	0	0.194	0	0	-0.2587	0	0.0647	0
OG0000751	0	0.1901	0	0.1901	0	0	0	0.4436	0	0.0633	0.1267	0	0	0.1267	0	0	0	0	0.0633	0.2535	0	0.2535	0	0.1901	0	0	-0.2535	0	0.1901	0
OG0000752	0	0.1901	0	0.1901	0	0	0	0.4436	0	0.0633	0.1267	0	0	0.1267	0	0	0	0	0.0633	0.1267	0	0.3802	0	0.1901	0	0	-0.2535	0	0.0633	0
OG0000753	0	0.1979	0	0.1979	0	0	0	0.4616	0	0.066	0.1319	0	0	0.1319	0	0	0	0	0.066	0.1319	0	0.2638	0	0.1979	0	0	0.066	0.1319	0.066	0
OG0000754	0	0.1979	0	0.1979	0	0	0	0.4616	0	0.066	0.1319	0	0	0.1319	0	0	0	0	0.066	0.1319	0	0.2638	0	0.1979	0	0	0.066	0.1319	0.066	0
OG0000755	0	0.1953	0	0.1953	0	0	0	0.4557	0	0.0651	0.1302	0	0	0.1302	0	0	0	0	0.0651	0.1302	0	0.2604	0	0.3255	0	0	0.0651	0	0.0651	0
OG0000756	0	0.1969	0	0.1969	0	0	0	0.4595	0	0.0656	0.1313	0	0	0.1313	0.1313	0	0	0	0.0656	0.1313	0	0.2626	0	0.1969	0	0	0.0656	0.1313	0.0656	0
OG0000757	0	0.1969	0	0.1969	0	0	0	0.4595	0	0.0656	0.1313	0	0	0.1313	0	0	0	0	0.0656	0.1313	0.1313	0.2626	0	0.1969	0	0	0.0656	0.1313	0.0656	0
OG0000758	0	0.1979	0	0.1979	0	0	0	0.4616	0	0.066	0.1319	0	0	0.1319	0	0	0	0	0.066	0.1319	0	0.2638	0	0.1979	0	0	0.066	0.1319	0.066	0
OG0000759	0	0.1979	0	0.1979	0	0	0	0.4616	0	0.066	0.1319	0	0	0.1319	0	0	0	0	0.066	0.1319	0	0.2638	0	0.1979	0	0	0.066	0.1319	0.066	0
OG0000760	0	0.1987	0	0.1987	0	0	0	0.4636	0	0.0663	0.1325	0	0	0.1325	0	0	0	0	0.0663	0.1325	0	0.2649	0	0.1987	0	0	0.0663	0	0.0663	0
OG0000761	0	0.1987	0	0.1987	0	0	0	0.4636	0	0.0663	0.1325	0	0	0.1325	0	0	0	0	0.0663	0.1325	0	0.2649	0	0.1987	0	0	0.0663	0	0.0663	0
OG0000762	0	0.1979	0	0.1979	0	0	0	0.4616	0	0.066	0.1319	0	0	0.1319	0	0	0	0	0.066	0.1319	0	0.2638	0	0.1979	0	0	0.066	0.1319	0.066	0
OG0000763	0	0.1979	0	0.1979	0	0	0	0.4616	0	0.066	0.1319	0	0	0.1319	0	0	0	0	0.066	0.1319	0	0.2638	0	0.1979	0.1319	0	0.066	0	0.066	0
OG0000764	0	0.1969	0	0.1969	0	0	0.1313	0.4595	0	0.0656	0.1313	0	0	0.1313	0	0	0	0	0.0656	0.1313	0	0.2626	0	0.1969	0	0.1313	0.0656	0	0.0656	0
OG0000765	0	0.1961	0	0.1961	0	0	0	0.4576	0	0.0653	0.1307	0	0	0.1307	0	0	0	0	0.1961	0.1307	0	0.2615	0	0.1961	0	0.1307	0.0653	0	0.0653	0
OG0000766	0	0.1979	0	0.1979	0	0	0	0.4616	0	0.066	0.1319	0	0.1319	0.1319	0	0	0	0	0.066	0.1319	0	0.2638	0	0.1979	0	0	0.066	0	0.066	0
OG0000767	0	0.1979	0	0.1979	0	0	0	0.4616	0	0.066	0.1319	0	0	0.1319	0	0.1319	0	0	0.066	0.1319	0	0.2638	0	0.1979	0	0	-0.066	0	0.066	0
OG0000768	0	0.1996	0	0.1996	0	0	0	0.4657	0	0.0665	0	0	0	0.1331	0	0	0	0	0.0665	0.1331	0	0.2661	0	0.1996	0	0	0.0665	0	0.0665	0
OG0000769	0	0.1969	0	0.1969	0	0	0.1313	0.4595	0	0.0656	0.1313	0	0	0.1313	0	0	0	0	0.0656	0.1313	0	0.2626	0	0.1969	0	0	0.0656	0.1313	0.0656	0
OG0000770	0	0.1969	0	0.1969	0	0	0.1313	0.4595	0	0.0656	0.1313	0	0	0.1313	0	0	0	0	-0.0656	0.1313	0	0.2626	0	0.1969	0	0	0.0656	0.1313	0.0656	0
OG0000771	0	0.1969	0	0.1969	0	0	0.1313	0.4595	0	0.0656	0.1313	0	0	0.1313	0	0	0	0	0.0656	0.1313	0	0.2626	0	0.1969	0	0	0.0656	0.1313	0.0656	0
OG0000772	0	0.1987	0	0.1987	0	0	0	0.4636	0	0.0663	0.1325	0	0	0.1325	0	0	0	0	0.0663	0.1325	0	0.2649	0	0.1987	0	0	0.0663	0	0.0663	0
OG0000773	0	0.1987	0	0.1987	0	0	0	0.4636	0	0.0663	0.1325	0	0	0.1325	0	0	0	0	0.0663	0.1325	0	0.2649	0	0.1987	0	0	0.0663	0	0.0663	0
OG0000774	0	0.1961	0	0.1961	0	0	0.1307	0.4576	0	0.0653	0.1307	0	0	0.1307	0	0	0	0	0.0653	0.1307	0	0.2615	0	0.1961	0	0	0.1961	0	0.0653	0
OG0000775	0	0.1969	0	0.1969	0	0	0	0.4595	0	0.0656	0.1313	0	0	0.1313	0	0	0	0	0.0656	0.1313	0	0.2626	0	0.1969	0	0	0.197	0	0.0656	0
OG0000776	0	0.1912	0	0.1912	0	0	0.1275	0.4463	0	0.0637	0.1275	0	0	0.255	0.1275	0	0	0	0.0637	0.1275	0	0.255	0	0.1912	0	0	0.1913	0	0.1913	0
OG0000777	0	0.1961	0	0.1961	0	0	0.1307	0.4576	0	0.0653	0.1307	0	0	0.1307	0	0	0	0	0.0653	0.1307	0	0.2615	0	0.1961	0	0	0.0653	0	0.1961	0
OG0000778	0	0.1969	0	0.1969	0	0	0.1313	0.4595	0	0.0656	0.1313	0	0	0.1313	0	0	0	0	0.0656	0.1313	0	0.2626	0	0.1969	0	0.1313	0.0656	0	0.0656	0
OG0000779	0	0.1912	0	0.3188	0	0	0.1275	0.4463	0	0.0637	0.1275	0	0	0.1275	0	0	0	0	0.0637	0.1275	0	0.255	0	0.1912	0	0	0.0637	0.1275	0.1913	0.1275
OG0000780	0	0.1979	0	0.1979	0	0	0.1319	0.4616	0	0.066	0.1319	0	0	0.1319	0	0	0	0	0.066	0.1319	0	0.2638	0	0.0659	0	0	0.066	0	0.1978	0
OG0000781	0	0.1987	0	0.1987	0	0	0	0.4636	0	0.0663	0.1325	0	0	0.1325	0	0	0	0	0.0663	0.1325	0	0.2649	0	0.1987	0	0	0.0663	0	-0.0663	0
OG0000782	0	0.1969	0	0.1969	0	0	0	0.4595	0	0.0656	0.1313	0	0	0.1313	0.1313	0	0	0	0.0656	0.1313	0	0.2626	0	0.1969	0	0	0.0656	0	0.0656	0.1313
OG0000783	0	0.1945	0	0.1945	0	0	0.1296	0.4538	0	0.0648	0.1297	0	0	0.1297	0	0	0	0	0.0648	0.2593	0	0.2593	0	0.1945	0	0	0.0648	0	0.0648	0.1296
OG0000784	0	0.1987	0	0.1987	0	0	0	0.4636	0	0.0663	0.1325	0	0	0.1325	0	0	0	0	0.0663	0.1325	0	0.2649	0	0.1987	0	0	0.0663	0	0.0663	0
OG0000785	0	0.1987	0	0.1987	0	0	0	0.4636	0	0.0663	0.1325	0	0	0.1325	0	0	0	0	0.0663	0.1325	0	0.2649	0	0.1987	0	0	0.0663	0	0.0663	0
OG0000786	0	0.1979	0	0.1979	0	0	0	0.4616	0	0.066	0.1319	0	0	0.1319	0	0	0	0	0.066	0.1319	0	0.2638	0	0.1979	0	0	0.066	0.1319	0.066	0
OG0000787	0	0.1996	0	0.1996	0	0	0.133	0.4657	0	0.0665	0.1331	0	0	0.1331	0	0	0	0	0.0665	0.1331	0	0.2661	0	0.0666	0	0	0.0665	0	0.0665	0
OG0000788	0	0.1987	0	0.1987	0	0	0.1325	0.4636	0	0.0663	0.1325	0	0	0.1325	0	0	0	0	0.0663	0.1325	0.1325	0.2649	0	0.0662	0	0	0.0663	0	0.0663	0
OG0000789	0	0.1928	0	0.1928	0	0	0.1286	0.45	0	0.0643	0.1285	0.1286	0	0.1285	0	0	0	0.1286	0.0643	0.1285	0	0.2571	0	0.3214	0	0	0.0643	0	0.0643	0
OG0000790	0	0.1969	0	0.1969	0	0	0.1313	0.4595	0	0.0656	0.1313	0	0	0.1313	0	0	0	0	0.0656	0.1313	0	0.2626	0	0.1969	0	0.1313	0.0656	0	0.0656	0
OG0000791	0	0.1969	0	0.1969	0	0	0.1313	0.4595	0	0.0656	0.1313	0	0	0.1313	0	0	0	0.1313	0.0656	0.1313	0	0.2626	0	0.1969	0	0	0.0656	0	0.0656	0
OG0000792	0	0.1961	0	0.1961	0	0	0.1307	0.4576	0	0.0653	0.1307	0	0	0.1307	0.1307	0	0	0.1307	0.0653	0.1307	0	0.2615	0	0.1961	0	0	0.0653	0	0.0653	0
OG0000793	0	0.1961	0	0.1961	0	0	0.1307	0.4576	0	0.0653	0.1307	0	0	0.1307	0	0	0	0.1307	0.0653	0.1307	0	0.2615	0	0.1961	0	0	0.0653	0	0.0653	0.1307
OG0000794	0	0.1928	0	0.1928	0	0	0.1286	0.45	0	0.0643	0.1285	0.1286	0	0.1285	0	0	0	0	0.0643	0.1285	0	0.3857	0	0.1928	0	0	0.0643	0	0.0643	0
OG0000795	0.1313	0.1969	0	0.1969	0	0	0.1313	0.4595	0	0.0656	0.1313	0	0	0.1313	0	0	0	0	0.0656	0.1313	0	0.2626	0	0.1969	0	0	0.0656	0	0.0656	0
OG0000796	0.1286	0.1928	0	0.1928	0	0	0	0.45	0.1286	0.0643	0.2571	0	0	0.1285	0	0	0	0	0.1928	0.1285	0	0.2571	0	0.1928	0	0	0.0643	0	0.0643	0
OG0000797	0.1319	0.1979	0	0.1979	0	0	0	0.4616	0	0.066	0.1319	0	0	0.1319	0	0	0	0	0.066	0.1319	0	0.2638	0	0.1979	0	0	0.066	0	0.066	0
OG0000798	0	0.1953	0	0.1953	0	0.1302	0.1302	0.4557	0.1302	0.0651	0.1302	0	0.1302	0.1302	0	0	0	0	0.0651	0.1302	0	0.2604	0	0.1953	0	0	0.0651	0	0.0651	0
OG0000799	0	0.1969	0	0.1969	0	0	0	0.4595	0	0.0656	0.1313	0	0.1313	0.1313	0	0	0	0	0.0656	0.1313	0.1313	0.2626	0	0.1969	0	0	0.0656	0	0.0656	0
OG0000800	0	0.1937	0.1291	0.1937	0	0	0	0.4519	0	0.0646	0.1291	0	0	0.1291	0	0	0	0	0.0646	0.1291	0	0.3873	0	0.1937	0	0	0.0646	0	0.0646	0
OG0000801	0	0.1979	0	0.1979	0	0	0	0.4616	0	0.066	0.1319	0	0	0.1319	0	0	0	0	0.066	0.1319	0	0.2638	0	0.1979	0	0.1319	0.066	0	0.066	0
OG0000802	0	0.1961	0	0.1961	0	0	0	0.4576	0	0.1961	0.1307	0	0	0.1307	0	0	0	0	0.0653	0.1307	0	0.2615	0	0.1961	0	0.1307	0.0653	0	0.0653	0
OG0000803	0	0.1979	0	0.1979	0	0	0	0.4616	0	0.066	0.1319	0	0	0.1319	0	0	0	0	0.066	0.1319	0	0.2638	0	0.1979	0	0.1319	0.066	0	0.066	0
OG0000804	0	0.1953	0	0.1953	0	0	0	0.4557	0	0.0651	0.2604	0	0	0.1302	0	0	0	0	0.0651	0.1302	0	0.2604	0	0.1953	0	0.1302	0.0651	0	0.0651	0
OG0000805	0	0.1979	0	0.1979	0	0	0	0.4616	0	0.1978	0.1319	0	0	0.1319	0	0	0	0	0.066	0.1319	0.1319	0.2638	0	0.0659	0	0	0.066	0	0.066	0
OG0000806	0	0.1987	0	0.1987	0	0.1325	0	0.4636	0	0.0663	0	0	0	0.1325	0	0	0	0	0.0663	0.1325	0	0.2649	0	0.1987	0	0	0.0663	0	0.0663	0
OG0000807	0	0.1987	0	0.1987	0	0	0	0.4636	0	0.0663	0.1325	0	0	0.1325	0	0	0	0	0.0663	0.1325	0	0.2649	0	0.1987	0	0	0.0663	0	0.0663	0
OG0000808	0	0.1979	0	0.1979	0	0	0.1319	0.4616	0	0.066	0.1319	0	0	0.1319	0	0	0	0	0.066	0.1319	0	0.2638	0	0.1979	0	0	0.066	0	0.066	0
OG0000809	0	0.1969	0	0.1969	0	0	0.1313	0.4595	0	0.0656	0.1313	0	0	0.1313	0.1313	0	0	0	0.0656	0.1313	0	0.2626	0	0.1969	0	0	0.0656	0	0.0656	0
OG0000810	0	0.1969	0	0.1969	0	0	0.1313	0.4595	0	0.0656	0.1313	0	0	0.1313	0	0	0	0	0.0656	0.1313	0	0.2626	0	0.1969	0	0	0.0656	0.1313	0.0656	0
OG0000811	0	0.1961	0	0.1961	0	0	0	0.4576	0	0.0653	0.2615	0	0	0.1307	0	0	0	0	0.0653	0.1307	0	0.2615	0	0.1961	0	0	0.0653	0	0.0653	0
OG0000812	0	0.1953	0	0.1953	0	0	0	0.4557	0	0.0651	0.1302	0	0	0.1302	0	0	0	0	0.0651	0.2604	0.1302	0.2604	0	0.1953	0	0	0.0651	0	0.0651	0
OG0000813	0	0.1945	0	0.1945	0	0	0	0.4538	0	0.0648	0.2593	0	0	0.1297	0	0	0	0	0.0648	0.1297	0	0.2593	0	0.1945	0	0	0.1945	0	0.0648	0
OG0000814	0	0.1969	0	0.1969	0	0	0	0.4595	0	0.0656	-0.1313	0	0	0.1313	0	0	0	0	0.0656	0.1313	0	0.2626	0	0.1969	0	0	0.197	0	0.0656	0
OG0000815	0	0.1987	0	0.1987	0	0.1325	0	0.4636	0	0.0663	0	0	0	0.1325	0	0	0	0	0.0663	0.1325	0	0.2649	0	0.1987	0	0	0.0663	0	0.0663	0
OG0000816	0	0.1979	0	0.1979	0	0	0	0.4616	0	0.066	0.1319	0	0	0.1319	0	0	0	0	0.066	0.1319	0	0.2638	0	0.1979	0	0	0.066	0.1319	0.066	0
OG0000817	0	0.1979	0	0.1979	0	0	0.1319	0.4616	0	0.066	0.1319	0	0	0.1319	0	0	0	0	0.066	0.1319	0	0.2638	0	0.1979	0	0	0.066	0	0.066	0
OG0000818	0	0.1961	0	0.1961	0	0	0	0.4576	0	0.0653	0	0	0	0.1307	0	0	0	0	0.0653	0.1307	0	0.2615	0	0.1961	0	0	0.1961	0	0.1961	0
OG0000819	0	0.1969	0	0.1969	0	0	0	0.4595	0	0.0656	0.1313	0	0	0.1313	0	0	0	0	0.0656	0.1313	0	0.2626	0	0.1969	0	0	0.0656	0	0.197	0
OG0000820	0	0.1961	0	0.1961	0	0	0	0.4576	0	0.0653	0.1307	0	0	0.1307	0	0	0	0	0.0653	0.1307	0	0.2615	0	0.1961	0	0	0.0653	0	0.1961	0.1307
OG0000821	0	0.1961	0	0.1961	0	0	0	0.4576	0	0.0653	0.1307	0	0	0.1307	0	0	0	0	0.0653	0.1307	0	0.2615	0	0.1961	0	0	0.0653	0.1307	0.1961	0
OG0000822	0	0.1953	0	0.1953	0	0	0.1302	0.4557	0	0.0651	0.2604	0	0	0.1302	0	0	0	0	0.0651	0.1302	0	0.2604	0	0.1953	0	0	0.0651	0	0.0651	0
OG0000823	0	0.1945	0	0.1945	0	0	0	0.4538	0	0.0648	0.2593	0	0	0.1297	0	0	0	0.1296	0.0648	0.1297	0	0.2593	0	0.1945	0	0	0.0648	0.1296	0.0648	0
OG0000824	0	0.1969	0	0.1969	0	0	0	0.4595	0	0.0656	0.1313	0	0.1313	0.1313	0	0	0	0	0.0656	0.1313	0	0.2626	0	0.1969	0.1313	0	0.0656	0	0.0656	0
OG0000825	0	0.1961	0	0.1961	0	0	0	0.4576	0	0.0653	0.2615	0	0	0.1307	0	0	0	0	0.0653	0.1307	0	0.2615	0	0.1961	0	0	0.0653	0	0.0653	0
OG0000826	0	0.1979	0	0.1979	0	0	0.1319	0.4616	0	0.066	0.1319	0	0	0.1319	0	0	0	0	0.066	0.1319	0	0.2638	0	0.1979	0	0	0.066	0	0.066	0
OG0000827	0	0.1953	0	0.3255	0	0	0	0.4557	0	0.0651	0.1302	0	0	0.1302	0	0	0	0	0.0651	0.1302	0	0.2604	0	0.1953	0	0	0.0651	0	0.0651	0
OG0000828	0	0.1912	0	0.1912	0	0	0.1275	0.4463	0	0.0637	0.255	0	0	0.1275	0	0	0	0	0.0637	0.1275	0	0.3825	0	0.1912	0	0	0.0637	0	0.0637	0
OG0000829	0	0.1969	0	0.1969	0	0	0.1313	0.4595	0	0.0656	0	0	0	0.1313	0	0	0	0	0.0656	0.1313	0	0.2626	0	0.1969	0	0	0.0656	0	0.197	0
OG0000830	0	0.1867	0	0.1867	0	0	0.1245	0.5603	0	0.0622	-0.249	0	0	0.1245	0	0	0	0	0.0622	0.1245	0	0.249	0	0.1867	0	0	0.0622	0.1245	0.1868	0
OG0000831	0	0.1969	0	0.1969	0	0	0.1313	0.3283	0	0.0656	-0.2626	0	0	0.1313	0	0	0	0	0.0656	0.1313	0	0.2626	0	0.1969	0	0	0.197	0	0.197	0
OG0000832	0	0.1945	0	0.1945	0	0	0.1296	0.4538	0	0.0648	-0.2593	0	0	0.1297	0	0.1296	0	0	0.0648	0.1297	0	0.2593	0	0.1945	0	0	0.0648	0	0.0648	0
OG0000833	0	0.1982	0	0.1982	0	0	0.1322	0.4626	0	0.0661	0.0661	0	0	0.1321	0	0.1322	0	0	0.0661	0.1321	0.1322	0.2643	0	0.1982	0	0	0.0661	0	0.0661	0
OG0000834	0	0.1982	0	0.1982	0	0	0.1322	0.4626	0	0.0661	0.1982	0	0	0.1321	0	0	0	0	0.0661	0.1321	0	0.2643	0	0.1982	0	0	0.0661	0	0.0661	0
OG0000835	0	0.1991	0	0.1991	0	0	0.1327	0.4646	0	0.0663	0.0663	0	0	0.1327	0	0	0	0	0.0663	0.1327	0	0.2655	0	0.1991	0	0	-0.0663	0.1327	0.0663	0
OG0000836	0	0.2	0	0.2	0	0	0.1333	0.4666	0	0.0666	0.2	0	0	0.1333	0	0	0	0	0.0666	0.1333	0	0.2666	0	0.0667	0	0	0.0666	0	0.0666	0
OG0000837	0	0.1974	0	0.1974	0	0	0.1316	0.4606	0	0.0658	0.1974	0	0	0.1316	0	0	0	0	0.0658	0.1316	0	0.2632	0	0.1974	0	0.1316	0.0658	0	0.0658	0
OG0000838	0	0.1974	0	0.1974	0	0	0.1316	0.4606	0	0.0658	0.1974	0	0	0.1316	0	0	0	0	0.0658	0.1316	0	0.2632	0	0.1974	0	0.1316	0.0658	0	0.0658	0
OG0000839	0	0.1991	0	0.1991	0	0	0.1327	0.4646	0	0.0663	0.0663	0	0	0.1327	0.1327	0	0	0	0.0663	0.1327	0	0.2655	0	0.1991	0	0	0.0663	0	0.0663	0
OG0000840	0	0.1982	0	0.1982	0	0	0.1322	0.4626	0	0.0661	0.0661	0	0	0.1321	0	0	0	0	0.0661	0.1321	0	0.2643	0	0.1982	0	0	0.1982	0	0.0661	0
OG0000841	0	0.1974	0	0.1974	0	0	0.1316	0.4606	0	0.1974	0.0658	0	0.1316	0.1316	0	0	0	0	0.0658	0.1316	0	0.2632	0	0.1974	0	0	0.0658	0	0.0658	0
OG0000842	0	0.2009	0	0.2009	0	0	0	0.4687	0	0.0669	0.0669	0	0	0.1339	0	0	0	0	0.0669	0.1339	0	0.2678	0	0.2009	0	0	0.0669	0	0.0669	0
OG0000843	0	0.2009	0	0.2009	0	0	0	0.4687	0	0.0669	0.0669	0	0	0.1339	0	0	0	0	0.0669	0.1339	0	0.2678	0	0.2009	0	0	0.0669	0	0.0669	0
OG0000844	0	0.2	0	0.2	0	0	0.1333	0.4666	0	0.0666	0.0666	0	0	0.1333	0	0	0	0	0.0666	0.1333	0	0.2666	0	0.2	0	0	0.0666	0	0.0666	0
OG0000845	0	0.2	0	0.2	0	0	0.1333	0.4666	0	0.0666	0.0666	0	0	0.1333	0	0	0	0	0.0666	0.1333	0	0.2666	0	0.2	0	0	0.0666	0	0.0666	0
OG0000846	0	0.1991	0	0.1991	0	0	0	0.4646	0	0.0663	0.1991	0	0	0.1327	0	0	0	0	0.0663	0.1327	0	0.2655	0	0.1991	0	0	0.0663	0	0.0663	0
OG0000847	0	0.2	0	0.2	0	0	0.1333	0.4666	0	0.0666	0.0666	0	0	0.1333	0	0	0	0	0.0666	0.1333	0	0.2666	0	0.2	0	0	0.0666	0	0.0666	0
OG0000848	0	0.2	0	0.2	0	0	0.1333	0.4666	0	0.0666	0.0666	0	0	0.1333	0	0	0	0	0.0666	0.1333	0	0.2666	0	0.2	0	0	0.0666	0	0.0666	0
OG0000849	0	0.2	0	0.2	0	0	0.1333	0.4666	0	0.0666	0.0666	0	0	0.1333	0	0	0	0	0.0666	0.1333	0	0.2666	0	0.2	0	0	0.0666	0	0.0666	0
OG0000850	0	0.1982	0	0.1982	0	0	0.1322	0.4626	0	0.0661	0.1982	0	0	0.1321	0	0	0	0	0.0661	0.1321	0	0.2643	0	0.1982	0	0	0.0661	0	0.0661	0
OG0000851	0	0.1991	0	0.1991	0	0	0	0.4646	0	0.0663	0.1991	0	0	0.1327	0	0	0	0	0.0663	0.1327	0	0.2655	0	0.1991	0	0	0.0663	0	0.0663	0
OG0000852	0	0.2027	0	0.2027	0	0	0	0.473	0	0.0675	0.0675	0	0	0.1351	0	0	0	0	0.0675	0.1351	0	0.2703	0	0.0676	0	0	0.0675	0	0.0675	0
OG0000853	0	0.2009	0	0.2009	0	0	0	0.4687	0	0.0669	0.0669	0	0	0.1339	0	0	0	0	0.0669	0.1339	0	0.2678	0	0.2009	0	0	0.0669	0	0.0669	0
OG0000854	0	0.2009	0	0.2009	0	0	0	0.4687	0	0.0669	0.0669	0	0	0.1339	0	0	0	0	0.0669	0.1339	0	0.2678	0	0.2009	0	0	0.0669	0	0.0669	0
OG0000855	0	0.1974	0	0.1974	0	0.1316	0	0.4606	0	0.0658	0.1974	0	0	0.1316	0	0	0	0	0.0658	0.1316	0	0.2632	0	0.1974	0	0.1316	0.0658	0	0.0658	0
OG0000856	0	0.1982	0	0.1982	0	0	0	0.4626	0	0.0661	0.1982	0	0	0.1321	0	0	0	0	0.0661	0.1321	0	0.2643	0	0.1982	0	0	0.0661	0.1322	0.0661	0
OG0000857	0	0.1982	0	0.1982	0	0	0.1322	0.4626	0	0.0661	0.1982	0	0	0.1321	0	0	0	0	0.0661	0.1321	0	0.2643	0	0.1982	0	0	0.0661	0	0.0661	0
OG0000858	0	0.1982	0	0.1982	0	0	0.1322	0.4626	0	0.0661	0.1982	0	0	0.1321	0	0	0	0	0.0661	0.1321	0	0.2643	0	0.1982	0	0	0.0661	0	0.0661	0
OG0000859	0	0.1924	0	0.1924	0	0	0	0.449	0	0.1925	0.0641	0	0	0.1283	0	0	0	0.1283	0.0641	0.1283	0	0.3849	0	0.1924	0	0	0.0641	0	0.1925	0
OG0000860	0	0.2	0	0.2	0	0.1333	0	0.4666	0	0.0666	0.0666	0	0	0.1333	0	0	0	0	0.0666	0.1333	0	0.2666	0	0.2	0	0	-0.0666	0	0.0666	0
OG0000861	0	0.1991	0	0.1991	0	0	0	0.4646	0	0.0663	0.1991	0	0	0.1327	0	0	0	0	0.0663	0.1327	0	0.2655	0	0.1991	0	0	-0.0663	0	0.0663	0
OG0000862	0.1305	0.1957	0	0.1957	0	0	0.1305	0.4567	0	0.0653	0.1957	0.1305	0	0.1305	0.1305	0	0	0	0.0653	0.1305	0	0.261	0	0.1957	0	0	0.0653	0	0.0653	0
OG0000863	0	0.1991	0	0.1991	0	0	0	0.4646	0	0.0663	0.1991	0	0	0.1327	0	0	0	0	0.0663	0.1327	0	0.2655	0	0.1991	0	0	0.0663	0	0.0663	0
OG0000864	0.1327	0.1991	0	0.1991	0	0	0.1327	0.4646	0	0.0663	0.0663	0	0	0.1327	0	0	0	0	0.0663	0.1327	0	0.2655	0	0.1991	0	0	0.0663	0	0.0663	0
OG0000865	0.1299	0.1948	0	0.3248	0	0	0.1299	0.4547	0	0.0649	0.0649	0	0	0.1299	0	0	0	0	0.0649	0.1299	0	0.2598	0	0.1948	0	0.1299	0.0649	0	0.0649	0
OG0000866	0.1333	0.2	0	0.2	0	0	0	0.4666	0	0.0666	0.0666	0	0	0.1333	0	0	0	0	0.0666	0.1333	0	0.2666	0	0.2	0	0	0.0666	0	0.0666	0
OG0000867	0.1294	0.194	0	0.194	0	0	0.1294	0.4528	0	0.0647	0.0647	0	0	0.1294	0	0	0	0.1294	0.0647	0.1294	0	0.3881	0	0.194	0	0	0.0647	0	0.0647	0
OG0000868	0	0.0664	0	0.1991	0	0	0.1327	0.4646	0	0.0663	0.1991	0	0	0.1327	0	0	0	0.1327	0.0663	0.1327	0	0.2655	0	0.1991	0	0	0.0663	0	0.0663	0
OG0000869	0	0.1991	0	0.1991	0	0	0	0.4646	0	0.0663	0.1991	0	0	0.1327	0	0	0	0	0.0663	0.1327	0	0.2655	0	0.1991	0	0	0.0663	0	0.0663	0
OG0000870	0	0.2009	0	0.2009	0	0	0	0.4687	0	0.0669	0.0669	0	0	0.1339	0	0	0	0	0.0669	0.1339	0	0.2678	0	0.2009	0	0	0.0669	0	0.0669	0
OG0000871	0	0.2	0	0.2	0	0	0	0.4666	0	0.0666	0.0666	0	0	0.1333	0	0	0	0.1333	0.0666	0.1333	0	0.2666	0	0.2	0	0	0.0666	0	0.0666	0
OG0000872	0	0.2	0	0.2	0	0	0	0.4666	0	0.0666	0.0666	0	0	0.1333	0	0	0	0.1333	0.0666	0.1333	0	0.2666	0	0.2	0	0	0.0666	0	0.0666	0
OG0000873	0	0.2009	0	0.2009	0	0	0.1339	0.4687	0	0.0669	0.0669	0	0	0	0	0	0	0	0.0669	0.1339	0	0.2678	0	0.2009	0	0	0.0669	0	0.0669	0
OG0000874	0	0.1957	-0.1305	0.1957	0	0.1305	0	0.4567	0	0.0653	0.0653	0	0	0	0	0	0	0	0.0653	0.1305	0	0.3914	0	0.1957	0	0	0.0653	0	0.0653	0
OG0000875	0	0.1991	-0.1327	0.1991	0	0	0	0.4646	0	0.0663	0.0663	0	0	0.1327	0	0	0	0	0.0663	0.1327	0	0.2655	0	0.1991	0.1327	0	0.0663	0	0.0663	0
OG0000876	0	0.1924	-0.1283	0.1924	0	0	0	0.5774	0	0.0641	0.0641	0	0	0.1283	0	0	0	0	0.0641	0.1283	0	0.2566	0	0.1924	0	0	0.0641	0.1283	0.0641	0
OG0000877	0	0.1917	-0.1278	0.1917	0	0	0	0.575	0	0.0639	0.0639	0	0	0.1278	0	0	0	0	0.0639	0.1278	0.1278	0.2555	0	0.1917	0	0	0.0639	0.1278	0.0639	0
OG0000878	0	0.1991	-0.1327	0.0664	0	0	0	0.4646	0	0.0663	0.1991	0	0	0.1327	0	0	0	0	0.0663	0.1327	0.1327	0.2655	0	0.1991	0	0	0.0663	0	0.0663	0
OG0000879	0	0.2	-0.1333	0.2	0	0	0	0.4666	0	0.0666	0.0666	0	0	0.1333	0	0	0	0	0.0666	0.1333	0	0.2666	0	0.2	0	0	0.0666	0	0.0666	0
OG0000880	0	0.2	-0.1333	0.2	0	0	0	0.4666	0	0.0666	0.0666	0	0	0.1333	0	0	0	0	0.0666	0.1333	0	0.2666	0	0.2	0	0	0.0666	0	0.0666	0
OG0000881	0	0.1974	-0.1316	0.1974	0	0	0	0.4606	0	0.0658	0.1974	0	0	0.1316	0	0	0	0	0.0658	0.1316	0.1316	0.2632	0	0.1974	0	0	-0.0658	0	0.0658	0
OG0000882	0	0.1982	-0.1322	0.1982	0	0	0.1322	0.4626	0	0.0661	0.0661	0	0	0.1321	0	0	0	0	0.0661	0.1321	0.1322	0.2643	0	0.1982	0	0	0.0661	0	0.0661	0
OG0000883	0	0.1991	-0.1327	0.1991	0	0	0	0.4646	0	0.0663	0.0663	0	0	0.1327	0	0	0	0	0.0663	0.1327	0.1327	0.2655	0	0.1991	0	0	0.0663	0	0.0663	0
OG0000884	0	0.1982	-0.1322	0.1982	0	0	0	0.4626	0	0.0661	0.0661	0	0	0.1321	0	0	0	0	0.0661	0.1321	0.1322	0.2643	0.1322	0.1982	0	0	0.0661	0	0.0661	0
OG0000885	0	0.1974	-0.1316	0.1974	0	0	0.1316	0.4606	0	0.0658	0.1974	0	0	0	0	0	0	0	0.0658	0.1316	0	0.2632	0.1316	0.1974	0	0	0.0658	0	0.0658	0
OG0000886	0	0.2	-0.1333	0.2	0	0	0	0.4666	0	0.0666	0.0666	0	0	0.1333	0	0	0	0	0.0666	0.1333	0	0.2666	0	0.2	0	0	0.0666	0	0.0666	0
OG0000887	0	0.3262	-0.1305	0.1957	0	0	0	0.4567	0	0.0653	0.0653	0	0	0.1305	0	0	0	0	0.0653	0.1305	0	0.261	0	0.1957	0	0	0.0653	0.1305	0.0653	0
OG0000888	0	0.1965	-0.131	0.1965	0	0	0	0.4586	0	0.1965	0.0655	0	0	0.131	0	0	0.131	0	0.0655	0.131	0	0.2621	0	0.1965	0	0	0.0655	0.131	0.0655	0
OG0000889	0	0.1991	-0.1327	0.1991	0	0	0	0.4646	0	0.0663	0.0663	0	0	0.1327	0	0	0	0	0.0663	0.1327	0	0.2655	0	0.1991	0	0	0.0663	0.1327	0.0663	0
OG0000890	0	0.1974	-0.1316	0.1974	0	0	0	0.4606	0	-0.0658	0.1974	0	0	0.1316	0	0	0	0	0.0658	0.1316	0	0.2632	0	0.1974	0	0	0.0658	0.1316	0.0658	0
OG0000891	0	-0.1965	-0.131	0.1965	0	0	0	0.4586	0	-0.0655	0.1965	0	0	0.131	0.131	0	0	0	0.0655	0.131	0	0.2621	0	0.1965	0	0	0.0655	0.131	0.0655	0
OG0000892	0	0.1982	-0.1322	0.1982	0	0	0	0.4626	0	0.0661	0.1982	0	0	0.1321	0	0	0	0	0.0661	0.1321	0	0.2643	0	0.1982	0	0	0.0661	0	0.0661	0
OG0000893	0	0.1917	-0.1278	0.1917	0	0	0	0.4472	0	0.1917	0.1917	0	0	0.1278	0	0	0	0	0.0639	0.1278	0	0.3833	0	0.1917	0.1278	0	0.0639	0	0.0639	0
OG0000894	0	0.1982	-0.1322	0.1982	0	0	0	0.4626	0	0.0661	0.1982	0	0	0.1321	0	0	0	0	0.0661	0	0	0.2643	0	0.1982	0.1322	0	0.0661	0	0.0661	0
OG0000895	0	0.2	-0.1333	0.2	0	0	0	0.4666	0	0.0666	0.0666	0	0	0.1333	0	0	0	0	0.0666	0.1333	0	0.2666	0	0.2	0	0	0.0666	0	0.0666	0
OG0000896	0	0.194	-0.1294	0.3234	0	0	0	0.4528	0	0.0647	0.0647	0	0	0.1294	0.1294	0	0	0	0.0647	0.1294	0	0.2587	0	0.194	0	0	0.1941	0	0.0647	0
OG0000897	0	0.1965	-0.131	0.3276	0	0	0	0.4586	0	0.0655	0.0655	0	0	0.131	0	0	0	0	0.0655	0.131	0	0.2621	0	0.1965	0	0	0.0655	0	0.0655	0
OG0000898	0	0.1991	-0.1327	0.1991	0	0	0	0.4646	0	0.0663	0.0663	0	0	0.1327	0	0	0	0.1327	0.0663	0.1327	0	0.2655	0	0.1991	0	0	0.0663	0	0.0663	0
OG0000899	0	0.1974	-0.1316	0.1974	0	0	0.1316	0.4606	0.1316	0.0658	0.0658	0	0	0.1316	0	0	0	0	0.0658	0.1316	0.1316	0.2632	0	0.1974	0	0	0.0658	0	0.0658	0
OG0000900	0	0.1991	-0.1327	0.1991	0	0	0	0.4646	0	0.0663	0.1991	0	0	0.1327	0	0	0	0	0.0663	0	0	0.2655	0	0.1991	0	0	0.0663	0	0.0663	0
OG0000901	0	0.1974	-0.1316	0.1974	0	0	0	0.4606	0	0.0658	0.1974	0	0	0.1316	0	0	0	0	0.0658	0.1316	0	0.2632	0	0.1974	0	0	0.0658	0	0.0658	0.1316
OG0000902	0	0.1982	-0.1322	0.1982	0	0	0	0.4626	0	0.0661	0.1982	0	0	0.1321	0	0	0	0	0.0661	0.1321	0	0.2643	0	0.1982	0	0	0.0661	0	0.0661	0
OG0000903	0	0.1974	-0.1316	0.1974	0	0	0.1316	0.4606	0	0.0658	0.1974	0	0	0.1316	0	0	0	0	0.0658	0.1316	0	0.2632	0	0.1974	0	0	0.0658	0	0.0658	0
OG0000904	0	0.1991	-0.1327	0.1991	0	0.1327	0	0.4646	0	0.0663	0.0663	0	0	0.1327	0	0	0	0	0.0663	0.1327	0	0.2655	0	0.1991	0	0	0.0663	0	0.0663	0
OG0000905	0	0.1991	-0.1327	0.1991	0	0	0	0.4646	0	0.0663	0.0663	0	0	0.1327	0	0	0	0	0.0663	0.1327	0	0.2655	0	0.1991	0	0.1327	0.0663	0	0.0663	0
OG0000906	0	0.1974	-0.1316	0.1974	0	0	0	0.4606	0	0.0658	0.1974	0	0	0.1316	0	0	0	0	0.0658	0.1316	0	0.2632	0	0.1974	0	0	0.0658	0.1316	0.0658	0
OG0000907	0	0.1974	-0.1316	0.1974	0	0	0	0.4606	0	0.0658	0.1974	0	0	0.1316	0	0	0	0	0.0658	0.1316	0	0.2632	0	0.1974	0	0	0.0658	0.1316	0.0658	0
OG0000908	0	0.1974	-0.1316	0.1974	0	0	0.1316	0.4606	0	0.0658	0.0658	0	0	0.1316	0	0	0	0.1316	0.0658	0.1316	0	0.2632	0	0.1974	0	0	0.0658	0.1316	0.0658	0
OG0000909	0	0.1974	-0.1316	0.1974	0	0	0	0.4606	0	0.0658	0.1974	0	0	0.1316	0	0	0	0	0.0658	0.1316	0	0.2632	0	0.1974	0	0	0.0658	0.1316	0.0658	0
OG0000910	0	0.2	-0.1333	0.2	0	0	0.1333	0.4666	0	0.0666	0.0666	0	0	0.1333	0	0	0	0	0.0666	0	0	0.2666	0	0.2	0	0	0.0666	0	0.0666	0
OG0000911	0	0.3276	-0.131	0.1965	0	0	0	0.4586	0	0.0655	0.0655	0	0	0.131	0	0	0	0	0.0655	0.131	0	0.2621	0	0.1965	0	0	0.0655	0	0.0655	0
OG0000912	0.1278	-0.1917	-0.1278	0.1917	0	0	0	0.575	0	0.0639	0.1917	0	0	0.1278	0	0	0	0	0.0639	0	0	0.2555	0	0.1917	0	0	0.0639	0	0.0639	0
OG0000913	0	0.3262	-0.1305	0.1957	0	0	0	0.4567	0.1305	0.0653	0.0653	0	0	0.1305	0	0	0	0	0.0653	0.1305	0	0.261	0	0.1957	0	0	0.0653	0	0.0653	0
OG0000914	0	-0.3262	-0.1305	0.1957	0	0	0.1305	0.4567	0	0.0653	0.0653	0	0	0.1305	0.1305	0	0	0	0.0653	0	0	0.261	0	0.1957	0	0	0.0653	0	0.0653	0
OG0000915	0	0.1349	-0.1348	0.2023	0	0	0	0.472	0	0.0674	0.0674	0	0	0.1349	0.1348	0	0	0	0.0674	0.1349	0	0.2697	0	0.2023	0	0	0.0674	0	0.0674	0
OG0000916	0	0.1336	-0.1336	0.2005	0	0	0.1336	0.4677	0	0.0668	0.2004	0	0	0.1336	0	0	0	0	0.0668	0.1336	0	0.2673	0	0.2005	0	0	0.0668	0	0.0668	0
OG0000917	0	0.1349	-0.1348	0.2023	0	0	0.1348	0.472	0	0.0674	0.2023	0	0	0.1349	0	0	0	0	0.0674	0.1349	0	0.2697	0	0.0675	0	0	0.0674	0	0.0674	0
OG0000918	0	0.1361	-0.1361	0.2042	0	0	0.1361	0.4763	0	0.0681	0.2041	0	0	0.1361	0	0	0	0	0.0681	0.1361	0	0	0	0.2042	0	0	0.0681	0	0.0681	0
OG0000919	0	0.1349	-0.1348	0.2023	0	0	0.1348	0.472	0	0.0674	0.0674	0	0	0.1349	0	0	0	0	0.0674	0.1349	0	0.2697	0	0.2023	0	0	0.0674	0	0.0674	0
OG0000920	0	0.1342	-0.1342	0.2014	0	0	0.1342	0.4698	-0.1342	0.0671	0.0671	0	0	0.1342	0	0	0	0	0.0671	0.1342	0	0.2685	0	0.2014	0	0	0.0671	0	0.0671	0
OG0000921	0	0.1342	-0.1342	0.2014	0	0	0.1342	0.4698	-0.1342	0.0671	0.0671	0	0	0.1342	0	0	0	0	0.0671	0.1342	0	0.2685	0	0.2014	0	0	0.0671	0	0.0671	0
OG0000922	0	0.1349	-0.1348	0.2023	0	0	0	0.472	-0.1348	0.0674	0.0674	0	0	0.1349	0	0	0	0	0.0674	0.1349	0	0.2697	0	0.2023	0	0	0.0674	0	0.0674	0
OG0000923	0	0.1355	-0.1355	0.2032	0	0	0	0.4741	-0.1355	0.0678	0.0678	0	0	0.1355	0	0	0	0	0.0678	0	0	0.2709	0	0.2032	0	0	0.0678	0	0.0678	0
OG0000924	0	0.1336	-0.1336	0.2005	0	0	0	0.4677	-0.1336	0.0668	0.2004	0	0	0.1336	0	0	0	0	0.0668	0.1336	0	0.2673	0	0.2005	0	0	0.0668	0	0.0668	0
OG0000925	0	0.1325	-0.1325	0.1987	0	0.1325	0.1325	0.4636	-0.1325	0.0663	0.1987	0	0	0.1325	0	0	0	0	0.0663	0.1325	0	0.2649	0	0.1987	0	0	0.0663	0	0.0663	0
OG0000926	0	0.1331	-0.133	0.1996	0	0	0	0.4657	-0.133	0.0665	0.1996	0	0	0.1331	0	0	0	0	0.0665	0.1331	0	0.2661	0	0.1996	0	0	0.0665	0.133	0.0665	0
OG0000927	0	0.1342	-0.1342	0.2014	0	0.1342	0	0.4698	-0.1342	0.0671	0.0671	0	0	0.1342	0	0	0	0	0.0671	0.1342	0	0.2685	0	0.2014	0	0	0.0671	0	0.0671	0
OG0000928	0	0.1313	-0.1313	0.1969	0	0	0	0.4595	-0.1313	0.0656	0.0656	0	0	0.1313	0	0	0	0	0.0656	0.1313	0.1313	0.3939	0	0.1969	0	0	0.0656	0	0.0656	0
OG0000929	0	0.1349	-0.1348	0.2023	0	0	0	0.472	-0.1348	0.0674	0.0674	0	0	0.1349	0	0	0	0	0.0674	0.1349	0	0.2697	0	0.2023	0	0	0.0674	0	0.0674	0
OG0000930	0	0.1336	-0.1336	0.2005	0	0	0	0.4677	-0.1336	0.0668	0.2004	0	0	0.1336	0	0	0	0	0.0668	0.1336	0	0.2673	0	0.2005	0	0	0.0668	0	0.0668	0
OG0000931	0	0.1349	-0.1348	0.2023	0	0	0	0.472	-0.1348	0.0674	0.0674	0	0	0.1349	0	0	0	0	0.0674	0.1349	0	0.2697	0	0.2023	0	0	0.0674	0	0.0674	0
OG0000932	0	0.1342	-0.1342	0.2014	0	0	0	0.4698	-0.1342	0.0671	0.0671	0	0	0.1342	0	0	0	0	0.0671	0.1342	0	0.2685	0.1342	0.2014	0	0	0.0671	0	0.0671	0
OG0000933	0	0.1342	-0.1342	0.2014	0	0	0.1342	0.4698	-0.1342	0.0671	0.0671	0	0	0.1342	0	0	0	0	0.0671	0.1342	0	0.2685	0	0.2014	0	0	0.0671	0	0.0671	0
OG0000934	0	0.1349	-0.1348	0.2023	0	0	0.1348	0.472	-0.1348	0.0674	0.0674	0	0	0.1349	0	0	0	0	0.0674	0	0	0.2697	0	0.2023	0	0	0.0674	0	0.0674	0
OG0000935	0	0.1342	-0.1342	0.2014	0	0	0.1342	0.4698	-0.1342	0.0671	0.0671	0	0	0.1342	0	0	0	0	0.0671	0.1342	0	0.2685	0	0.2014	0	0	0.0671	0	0.0671	0
OG0000936	0	0	-0.1319	0.1979	0	0	0	0.4616	-0.1319	0.066	0.066	0	0	0.1319	0	0	0	0.1319	0.066	0.1319	0	0.3956	0	0.1979	0	0	0.066	0	0.066	0
OG0000937	0	0.1336	-0.1336	0.2005	0	0	0	0.4677	-0.1336	0.0668	0.2004	0	0	0.1336	0	0	0	0	0.0668	0.1336	0	0.2673	0	0.2005	0	0	0.0668	0	0.0668	0
OG0000938	0	0.1313	-0.1313	0.1969	0	0	0	0.4595	-0.1313	0.0656	0.0656	0	0	0.1313	0	0	0	0.1313	0.0656	0.1313	0	0.3939	0	0.1969	0	0	0.0656	0	0.0656	0
OG0000939	0	0.1331	-0.133	0.1996	0	0	0	0.4657	-0.133	0.0665	0.1996	0	0	0.1331	0	0	0	0.133	0.0665	-0.1331	0	0.2661	0	0.1996	0	0	0.0665	0	0.0665	0
OG0000940	0	0.1336	-0.1336	0.2005	0	0	0	0.4677	-0.1336	0.0668	0.0668	0	0	0.1336	0	0	0	0	0.2004	0	0.1336	0.2673	0	0.2005	0	0	0.0668	0	0.0668	0
OG0000941	0	0	-0.1355	0.2032	0	0	0	0.4741	-0.1355	0.0678	0.0678	0	0	0.1355	0	0	0	0	0.0678	0.1355	0	0.2709	0	0.2032	0	0	0.0678	0	0.0678	0
OG0000942	0	0.1325	-0.1325	0.3311	0	0	0	0.4636	-0.1325	0.0663	0.0663	0	0	0.1325	0	0	0	0	0.0663	0.1325	0	0.2649	0	0.1987	0	0	0.0663	0	0.0663	0
OG0000943	0	0.1349	-0.1348	0.2023	0	0	0	0.472	-0.1348	0.0674	0.0674	0	0	0.1349	0	0	0	0	0.0674	0.1349	0	0.2697	0	0.2023	0	0	0.0674	0	0.0674	0
OG0000944	0	0.1342	-0.1342	0.2014	0	0	0	0.4698	-0.1342	0.0671	0.0671	0.1342	0	0.1342	0	0	0	0	0.0671	0.1342	0	0.2685	0	0.2014	0	0	0.0671	0	0.0671	0
OG0000945	0	0.1336	-0.1336	0.2005	0	0	0.1336	0.4677	-0.1336	0.0668	0.0668	0	0	0.1336	0	0	0	0	0.0668	0.1336	0.1336	0.2673	0	0.2005	0	0	0.0668	0	0.0668	0
OG0000946	0.1307	0.1307	-0.1307	0.1961	0	0	0.1307	0.4576	-0.1307	0.0653	0.0653	0	0	0.1307	0	0	0	0	0.0653	0.1307	0	0.3922	0	0.1961	0	0	0.0653	0	0.0653	0
OG0000947	0	0.1349	-0.1348	0.2023	0	0.1348	0	0.472	-0.1348	0.0674	-0.0674	0	0	0.1349	0	0	0	0	0.0674	0	0	0.2697	0	0.2023	0	0	0.0674	0	0.0674	0
OG0000948	0	0.1342	-0.1342	0.2014	0	0	0	0.4698	-0.1342	0.0671	0.2013	0	0	0.1342	0	0	0	0	0.0671	0	0	0.2685	0	0.2014	0	0	0.0671	0	0.0671	0
OG0000949	0	0.1336	-0.1336	0.2005	0	0	0.1336	0.4677	-0.1336	0.0668	0.2004	0	0	0.1336	0	0	0	0	0.0668	0	0	0.2673	0	0.2005	0	0	0.0668	0	0.0668	0
OG0000950	0	0.1336	-0.1336	0.2005	0	0	0	0.4677	-0.1336	0.0668	0.2004	0	0.1336	0.1336	0	0	0	0	0.0668	0	0	0.2673	0	0.2005	0	0	0.0668	0	0.0668	0
OG0000951	0	0.1349	-0.1348	0.2023	0	0	0.1348	0.472	-0.1348	0.0674	0.0674	0	0	0.1349	0	0	0	0	0.0674	0	0	0.2697	0	0.2023	0	0	0.0674	0	0.0674	0
OG0000952	0	0.1355	0	0.2032	0	0	0.1355	0.4741	-0.1355	0.0678	0.0678	0	0	0.1355	0	0	0	0	0.0678	0.1355	0	0.2709	0	0.2032	0	0	0.0678	0	0.0678	0
OG0000953	0	0.1342	0	0.2014	0	0	0	0.4698	-0.1342	0.0671	0.0671	0	0	0.1342	0	0	0	0	0.0671	0.2685	0	0.2685	0	0.2014	0	0	0.0671	0	0.0671	0
OG0000954	0	0.1342	0	0.2014	0	0	0	0.4698	-0.1342	0.0671	0.0671	0	0	0.1342	0	0	0	0	0.0671	0.2685	0	0.2685	0	0.2014	0	0	0.0671	0	0.0671	0
OG0000955	0.1336	0.1336	0	0.2005	0	0	0	0.4677	-0.1336	0.0668	0.0668	0	0	0.1336	0	0	0	0	0.0668	0.2673	0	0.2673	0	0.2005	0	0	0.0668	0	0.0668	0
OG0000956	0	0.2615	0	0.1961	0	0	0	0.4576	-0.1307	0.0653	0.1961	0	0	0.1307	0.1307	0	0	0	0.0653	0.2615	0	0.2615	0	0.1961	0	0	0.0653	0	0.0653	0
OG0000957	0	0.1325	0	0.1987	0	0	0.1325	0.4636	-0.1325	0.0663	0.1987	0	0	0.1325	0	0	0	0	0.0663	0.2649	0	0.2649	0	0.1987	0	0	0.0663	0	0.0663	0
OG0000958	0	0.1325	0	-0.0662	0	0	0	0.4636	-0.1325	0.0663	0.1987	0	0	0.1325	0	0	0	0.1325	0.1987	0.2649	0	0.2649	0	0.1987	0	0	0.0663	0	0.0663	0
OG0000959	0.1336	0.1336	0	0.2005	0	0	0	0.4677	-0.1336	0.0668	0.0668	0	0	0.1336	0	0	0	0	0.0668	0.2673	0	0.2673	0	0.2005	0	0	0.0668	0	0.0668	0
OG0000960	0	0.2691	0	0.2018	0	0	0	0.4708	-0.1345	0.0672	0.2018	0	0	0.1345	0	0	0	0	0.0672	0.0672	0	0.269	0	0.2018	0	0	0.0672	0	0.0672	0
OG0000961	0.137	0.1371	0	0.2056	0	0	0	0.4797	-0.137	0.0685	0.0685	0	0	0.1371	0	0	0	0	0.0685	0.0685	0	0.2741	0	0.2056	0	0	0.0685	0	0.0685	0
OG0000962	0	0.1316	0	0.1974	0	0	0	0.5922	-0.1316	0.0658	0.0658	0	0	0.1316	0	0	0	0	0.1974	0.0658	0	0.2632	0	0.1974	0	0	0.0658	0	0.0658	0
OG0000963	0	0.1351	0	0.2027	0	0	0	0.473	-0.1351	0.0675	0.0675	0	0	0.1351	0.1351	0	0	0.1351	0.2027	0.0675	0	0.2703	0	0.2027	0	0	0.0675	0	0.0675	0
OG0000964	0	0.1358	0	0.2036	0	0	0	0.4752	-0.1358	0.0679	0.0679	0	0	0.1358	0.1358	0	0	0	0.0679	0.2037	0	0.2715	0	0.2036	0	0	0.0679	0	0.0679	0
OG0000965	0	0.1358	0	0.2036	0	0	0.1358	0.4752	-0.1358	0.0679	0.0679	0	0	0.1358	0	0	0	0	0.0679	0.2037	0	0.2715	0	0.2036	0	0	0.0679	0	0.0679	0
OG0000966	0	0.1364	0	0.2046	0	0	0	0.4774	-0.1364	0.0682	0.0682	0	0	0.1364	0	0	0	0	0.0682	0.2046	0	0.2728	0	0.2046	0	0	0.0682	0	0.0682	0
OG0000967	0	0.1364	0	0.2046	0	0	0	0.4774	-0.1364	0.0682	0.2046	0	0	0.1364	0	0	0	0	0.0682	0.0682	0	0.2728	0	0.2046	0	0	0.0682	0	0.0682	0
OG0000968	0	0.1351	0	0.2027	0	0.1351	0.1351	0.473	-0.1351	0.0675	0.2027	0	0	0.1351	0	0	0	0	0.0675	0.0675	0	0.2703	0	0.2027	0	0	0.0675	0	0.0675	0
OG0000969	0	0.1351	0	0.2027	0	0	0	0.473	-0.1351	0.2027	0.2027	0	0	0.1351	0	0	0	0	0.0675	0.0675	0	0.2703	0	0.2027	0	0	0.0675	0	0.0675	0
OG0000970	0	0.1377	0	0.2066	0	0	0	0.4819	-0.1377	0.0689	0.0689	0	0	0.1377	0	0	0	0	0.0689	0.2065	0	0.2754	0	0.0688	0	0	0.0689	0	0.0689	0
OG0000971	0	0.1358	0	0.2036	0	0	0	0.4752	-0.1358	0.2037	0.0679	0	0	0.1358	0	0	0	0	0.0679	0.0679	0	0.2715	0	0.2036	0	-0.1358	0.0679	0	0.0679	0
OG0000972	0	0.1364	0	0.2046	0	0	0	0.4774	-0.1364	0.2046	0.0682	0	0.1364	0.1364	0	0	0	0	0.0682	0.0682	0	0.2728	0	0.0682	0	-0.1364	0.0682	0	0.0682	0
OG0000973	0	0.1383	0	0.2075	0	0	0	0.4842	-0.1383	0.0691	0.0691	0	0	0.1383	0	0	0	0	0.0691	0.0691	0	0.2767	0	-0.0692	0	-0.1383	0.0691	0	0.0691	0
OG0000974	0	0.1345	0	0.2018	0	0	0.1345	0.4708	-0.1345	0.0672	0.0672	0	0	0.1345	0.1345	0	0	0	0.0672	0.2018	0	0.269	0	-0.2018	0	-0.1345	0.0672	0	0.0672	0
OG0000975	0	0.1316	0	0.1974	0	0	0.1316	0.4606	-0.1316	0.0658	0.0658	0	0	0.1316	0	0	0	0	0.0658	0.1974	0	0.2632	0	-0.329	0	-0.1316	0.0658	0	0.1974	0
OG0000976	0	0.1321	0	0.1982	0	0	0	0.4626	-0.1322	0.0661	0.1982	0	0	0.1321	0	0	0	0	0.0661	0.1982	0	0.2643	0	-0.3304	0	-0.1322	0.0661	0	0.0661	0
OG0000977	0	0.1373	0	0.206	0	0	0.1374	0.4807	-0.1374	0.0687	0.0687	0	0	0.1373	0	0	0	0	0.0687	0.206	0	0.2747	0	0.1373	0	-0.1374	0.0687	0	0.0687	0
OG0000978	0	0.1355	0	0.2032	0	0	0.1355	0.4741	-0.1355	0.2032	0.0678	0	0	0.1355	0.1355	0	0	0	0.0678	0.2032	0	0.2709	0	0.1355	0	-0.1355	0.0678	0	0.0678	0
OG0000979	0	0.1367	0	0.205	0	0	0	0.4785	-0.1367	0.0683	0.0683	0	0	0.1367	0	0	0	0	0.0683	0.2051	0	0.2734	0	0.1367	0	-0.1367	0.0683	0.1367	0.0683	0.1367
OG0000980	0	0.1387	0	0.2081	0	0	0	0.4854	-0.1387	0.0694	0.0694	0	0	0.1387	0	0	0	0	0.0694	0.208	0	0.2774	0	0	0	-0.1387	0.0694	0	0.0694	0
OG0000981	0	0.1393	0	0.209	0	0	0	0.4877	-0.1393	0.0696	0.0696	0	0	0.1393	0	0	0	0	0.0696	0.0696	0	0.2787	0	0.1393	0	-0.1393	0.0696	0	0.0696	0
OG0000982	0	0.138	0	0.207	0	0	0	0.4831	-0.138	0.069	0.207	0	0	0.138	0	0	0	0	0.069	0.207	0	0.276	0	0.138	0	0	-0.069	0	0.069	0
OG0000983	0	0.1393	0	0.209	0	0.1393	0.1393	0.4877	-0.1393	0.0696	0.0696	0	0	0.1393	0	0	0	0	0.0696	0.0696	0	0.2787	0	0.1393	0	0	-0.0696	0	0.0696	0
OG0000984	0	0.14	0	0.2101	0	0	0	0.4901	-0.14	0.07	0.07	0	0	0.14	0	0	0	0	0.07	0.07	0	0.2801	0	0.14	0	0	0.07	0	0.07	0.14
OG0000985	0	0.1387	0	0.2081	0	0	0	0.4854	-0.1387	0.0694	0.208	0	0	0.1387	0	0	0	0	0.0694	0.208	0	0.2774	0	0	0	0	0.0694	0	0.0694	0
OG0000986	0	0.1361	0	0.2042	0	0	0	0.4763	-0.1361	0.0681	0.0681	0.1361	0	0.1361	0	0	0	0.1361	0.0681	0.2041	0	0.2722	0	0.2722	0	0	0.0681	0	0.0681	0
OG0000987	0	0.1373	0	0.206	0	0	0	0.4807	-0.1374	0.0687	0.0687	0	0	0.1373	0	0	0	0	0.0687	0.206	0	0.2747	0	0.2747	0	0	0.0687	0	0.0687	0
OG0000988	0	0.1355	0	0.2032	0	0	0.1355	0.4741	-0.1355	0.0678	0.2032	0	0	0.1355	0	0	0	0	0.0678	0.2032	0	0.2709	0	0.2709	0	0	0.0678	0	0.0678	0
OG0000989	0	0.138	0	0.207	0	0	0	0.4831	-0.138	0.069	0.207	0	0.138	0.138	0	0	0	0.138	0.069	0.069	0	0.276	0	0.138	0	0	0.069	0	0.069	0
OG0000990	0	0.1373	0	0.206	0	0	0	0.4807	-0.1374	0.0687	0.0687	0	0	0.1373	0	0	0	0	0.0687	0.206	0	0.2747	0	0.2747	0	0	0.0687	0	0.0687	0
OG0000991	0	0.1387	0	0.2081	0	0	0.1387	0.4854	-0.1387	0.0694	0.208	0	0	0.1387	0	0	0	0	0.0694	0.0694	0	0.2774	0	0.1387	0	0	-0.0694	0	0.0694	0
OG0000992	0	0.1373	0	0.206	0	0	0.1374	0.4807	-0.1374	0.0687	0.206	0	0	0.1373	0	0	0	0	0.0687	0.206	0	0.2747	0	0.1373	0	0	0.0687	0	0.0687	0
OG0000993	0	0.1367	0	0.205	0	0	0.1367	0.4785	-0.1367	0.0683	0.0683	0	0	0.1367	0	0	0	0	0.0683	0.2051	0	0.2734	0	0.2734	0	0	0.0683	0	0.0683	0
OG0000994	0	0.138	0	0.207	0	0	0	0.4831	-0.138	0.069	0.207	0	0	0.138	0	0	0	0	0.069	0.207	0	0.276	0	0.138	0	0	0.069	0	0.069	0
OG0000995	0	0.1342	0	0.2014	0	0	0	0.4698	-0.1342	0.0671	0.2013	0	0	0.1342	0	0	0	0	0.0671	0.0671	0	0.4027	0	0.2685	0	0	0.0671	0	0.0671	0
OG0000996	0	0.138	0	0.207	0	0	0.138	0.4831	-0.138	0.069	0.069	0	0	0.138	0	0	0	0	0.069	0.069	0	0.276	0	0.138	0	0	0.069	0	0.069	0
OG0000997	0	0.1355	0	0.2032	0	0	0	0.4741	-0.1355	0.0678	0.2032	0	0	0.1355	0	0	0	0	0.0678	0.0678	0	0.2709	0	0.1355	0	0	0.0678	0.1355	0.2032	0
OG0000998	0	0.1355	0	0.2032	0	0	0	0.4741	-0.1355	0.0678	0.2032	0	0	0.1355	0	0	0	0.1355	0.2032	0.0678	0	0.2709	0	0.1355	0	0	0.0678	0	0.0678	0
OG0000999	0	0.1349	0	0.2023	0	0	0	0.472	-0.1348	0.0674	0.0674	0	0	0.1349	0	0	0	0.1348	0.0674	0.0674	0	0.4045	0	0.1349	0	0	0.0674	0	0.0674	0
OG0001000	0	0.1342	0	0.2014	0	0	0	0.4698	-0.1342	0.0671	0.0671	0	0	0.1342	0	0	0	0.1342	0.0671	0.2013	0	0.2685	0	0.2685	0	0	0.0671	0	0.0671	0.1342
OG0001001	0	0.1349	0	0.2023	0	0	0	0.472	-0.1348	0.0674	0.2023	0	0	0.1349	0	0	0	0	0.0674	0.0674	0	0.2697	0	0.2697	0	0	0.0674	0.1348	0.0674	0
OG0001002	0	0.2709	0	0.2032	0	0	0	0.4741	-0.1355	0.0678	0.0678	0	0	0.1355	0.1355	0	0	0	0.0678	0.0678	0	0.2709	0	0.1355	0.1355	0	0.0678	0	0.0678	0
OG0001003	0	0.1355	0	0.2032	0	0	0.1355	0.4741	-0.1355	0.0678	0.2032	0	0	0.1355	0	0	0	0	0.0678	0.2032	0	0.2709	0	0.1355	0	0	0.0678	0	0.0678	0
OG0001004	0	0.1361	0	0.2042	0	0	0	0.4763	-0.1361	0.0681	0.0681	0	0.1361	0.1361	0	0	0	0	0.0681	0.0681	0	0.2722	0	0.2722	0	0	0.0681	0	0.0681	0
OG0001005	0	0.1373	0	0.206	0	0	0	0.4807	-0.1374	0.0687	0.0687	0	0	0.1373	0	0	0	0	0.0687	0.206	0	0.2747	0	0.1373	0	0	0.0687	0	0.0687	0
OG0001006	0	0.1361	0	0.2042	0	0	0	0.4763	-0.1361	0.0681	0.2041	0	0	0.1361	0	0	0	0	0.0681	0.0681	0	0.2722	0	0.1361	0	0	0.0681	0	0.2041	0
OG0001007	0	0.1355	0	0.2032	0	0	0	0.4741	-0.1355	0.0678	0.0678	0	0	0.1355	0	0	0	0	0.0678	0.2032	0	0.2709	0	0.1355	0	0	0.0678	0	0.2032	0.1355
OG0001008	0	0.1387	0	0.2081	0	0	0	0.4854	-0.1387	0.0694	0.0694	0	0	0.1387	0	0	0	0	0.0694	0.0694	0	0.2774	0	0.1387	0	0	0.0694	0	0.0694	0
OG0001009	0	0.138	0	0.207	0	0	0	0.4831	-0.138	0.069	0.207	0	0	0.138	0	0	0	0	0.069	0.069	0	0.276	0	0	0	0	-0.069	0	0.069	0
OG0001010	0	0.1373	0	0.206	0	0	0	0.4807	-0.1374	0.0687	0.206	0	0	0.1373	0	0	0	0	0.0687	0.0687	0	0.2747	0	0.1373	0	0	0.0687	0	0.0687	0
OG0001011	0	0.1367	0	0.205	0	0	0	0.4785	-0.1367	0.0683	0.2051	0	0	0.1367	0	0	0	0	0.0683	0.0683	0.1367	0.2734	0	0.1367	0	0	0.0683	0	0.0683	0
OG0001012	0	0.1373	0	0.206	0	0	0	0.4807	-0.1374	0.206	0.0687	0	0	0.1373	0	0	0	0	0.0687	0.0687	0	0.2747	0	0.1373	0	0	0.0687	0	0.0687	0
OG0001013	0	0.1355	0	0.2032	0	0	0	0.4741	-0.1355	0.0678	0.0678	0	0	0.1355	0	0	0	0	0.0678	0.2032	0	0.2709	0	0.2709	0	0	0.0678	0	0.0678	0
OG0001014	0	0.1355	0	0.2032	0	0	0	0.4741	-0.1355	-0.0678	0.0678	0	0	0.1355	0	0	0	0	0.0678	0.2032	0	0.2709	0	0.2709	0	0	0.0678	0	0.0678	0
OG0001015	0	0.1319	0	0.1979	0	0	0	0.5934	-0.1319	0.066	-0.066	0	0	0.1319	0	0	0.1319	0	0.066	0.1978	0	0.2638	0	0.1319	0	0	0.066	0	0.066	0
OG0001016	0	0	0	0.207	0	0	0	0.4831	-0.138	0.069	0.207	0	0	0.138	0	0	0	0	0.069	0.069	0	0.276	0	0.138	0	0	0.069	0	0.069	0
OG0001017	0	0.1373	0	0.206	0	0	0	0.4807	-0.1374	0.0687	0.0687	0	0	0.1373	0	0	0	0	0.0687	0.206	0	0.2747	0	0.1373	0	0	0.0687	0	0.0687	0
OG0001018	0	0.138	0	0.207	0	0	0	0.4831	-0.138	0.069	0.069	0	0	0.138	0	0	0	0	0.069	0.207	0	0.276	0	0	0	0	0.069	0	0.069	0
OG0001019	0	0.2697	0	0.2023	0	0	0	0.472	-0.1348	0.0674	0.0674	0	0	0.1349	0	0	0	0	0.0674	0.0674	0	0.2697	0	0.2697	0	0	0.0674	0	0.0674	0
OG0001020	0	0.2697	0	0.2023	0	0	0	0.472	-0.1348	-0.0674	0.0674	0	0	0.1349	0	0	0	0	0.0674	0.0674	0	0.2697	0	0.2697	0	0	0.0674	0	0.0674	0
OG0001021	0	0.1367	0	0.0684	0	0	0	0.4785	-0.1367	0.0683	0.0683	0	0	0.1367	0	0	0	0	0.0683	0.2051	0	0.2734	0	0.2734	0	0	0.0683	0	0.0683	0
OG0001022	0	0.1342	0	0.2014	0	0	0	0.4698	-0.1342	0.0671	0.2013	0	0	0.1342	0	0	0	0	0.0671	0.2013	0	0.2685	0	0.2685	0	0	0.0671	0	0.0671	0
OG0001023	0	0.1367	0	0.205	0	0	0	0.4785	-0.1367	0.0683	0.0683	0	0	0.1367	0	0	0	0	0.0683	0.0683	0	0.2734	0	0.1367	0	0	0.0683	0	0.2051	0.1367
OG0001024	0	0.1387	0	0.2081	0	0	0	0.4854	-0.1387	0.0694	0.0694	0	0	0.1387	0	0	0	0	0.0694	0.0694	0	0.2774	0	0.1387	0	0	0.0694	0	0.0694	0
OG0001025	0	0.1349	0	0.2023	0	0	0.1348	0.472	-0.1348	0.2023	0.0674	0	0	0.1349	0	0	0	0	0.0674	0.2023	0	0.2697	0	0.1349	0	0	0.0674	0.1348	0.0674	0
OG0001026	0.1374	0.1373	0	0.206	0	0	0	0.4807	-0.1374	0.0687	0.0687	0	0	0.1373	0	0	0	0	0.0687	0.206	0	0.2747	0	0	0	0	0.0687	0	0.0687	0
OG0001027	0	0.1342	0	0.2014	0	0	0.1342	0.4698	-0.1342	0.0671	0.0671	0	0	0.1342	0	0	0	0	0.0671	0.2013	0	0.2685	0	0.2685	0.1342	0	0.0671	0	0.0671	0
OG0001028	0	0.1355	0	0.3386	0	0	0	0.4741	-0.1355	0.0678	0.0678	0	0	0.1355	0	0	0	0	0.0678	0.0678	0	0.2709	0	0.1355	0.1355	0	0.0678	0	0.0678	0
OG0001029	0	0.1387	0	0.2081	0	0	0	0.4854	-0.1387	0.0694	0.0694	0	0	0.1387	0	0	0	0	0.0694	0.0694	0	0.2774	0	0.1387	0	0	0.0694	0	0.0694	0
OG0001030	0	0.1349	0	0.2023	0	0	0.1348	0.472	-0.1348	0.0674	0.2023	0	0	0.1349	0	0	0	0	0.0674	0.2023	0	0.2697	0	0.1349	0.1348	0	0.0674	0	0.0674	0
OG0001031	0	0.1367	0	0.205	0	0	0.1367	0.4785	-0.1367	0.0683	0.0683	0	0	0.1367	0	0	0	0	0.0683	0.2051	0	0.2734	0	0.1367	0	0	0.0683	0	0.0683	0
OG0001032	0	0.1387	0	0.2081	0	0	0	0.4854	-0.1387	0.0694	0.0694	0	0	0.1387	0	0	0	0	0.0694	0.0694	0	0.2774	0	0.1387	0	0	0.0694	0	0.0694	0
OG0001033	0	0.1367	0	0.205	0	0	0	0.4785	-0.1367	0.0683	0.0683	0	0	0.1367	0	0	0	0	0.0683	0.0683	0	0.2734	0	0.2734	0	0	0.0683	0	0.0683	0
OG0001034	0	0.1387	0	0.2081	0	0	0	0.4854	-0.1387	0.0694	0.0694	0	0	0.1387	0	0	0	0	0.0694	0.0694	0	0.2774	0	0.1387	0	0	0.0694	0	0.0694	0
OG0001035	0	0.1361	0	0.2042	0	0	0.1361	0.4763	-0.1361	0.0681	0.2041	0.1361	0	0.1361	0	0	0	0	0.0681	0.0681	0	0.2722	0	0.1361	0	0	0.0681	0	0.0681	0
OG0001036	0	0.1361	0	0.2042	0	0	0	0.4763	-0.1361	0.0681	0.2041	0	0	0.1361	0	0	0	0	0.0681	0.2041	0	0.2722	0	0.1361	0	0	0.0681	0	0.0681	0
OG0001037	0	0.1373	0	0.206	0	0	0	0.4807	-0.1374	0.0687	0.0687	0	0	0.1373	0	0	0	0	0.0687	0.0687	0.1374	0.2747	0	0.1373	0	0	0.0687	0	0.0687	0.1373
OG0001038	0	0.1361	0	0.2042	0	0	0	0.4763	-0.1361	0.0681	0.0681	0	0	0.1361	0	0	0	0	0.0681	0.0681	0	0.2722	0	0.2722	0	0	0.0681	0.1361	0.0681	0
OG0001039	0	0.1367	0	0.205	0	0	0	0.4785	-0.1367	0.0683	0.0683	0	0	0.1367	0	0	0	0	0.0683	0.0683	0	0.2734	0	0.2734	0	0	0.0683	0	0.0683	0
OG0001040	0	0.1355	0	0.2032	0	0	0	0.4741	-0.1355	0.0678	0.2032	0	0	0.1355	0	0	0	0	0.0678	0.0678	0	0.2709	0	0.2709	0	0	0.0678	0	0.0678	0
OG0001041	0	0.1367	0	0.205	0	0	0	0.4785	-0.1367	0.0683	0.0683	0	0	0.1367	0	0	0.1367	0	0.0683	0.2051	0	0.2734	0	0.1367	0	0	0.0683	0	0.0683	0
OG0001042	0	0.1373	0	0.206	0	0	0	0.4807	-0.1374	0.0687	0.0687	0	0	0.1373	0	0	0	0.1374	0.0687	0.206	0	0.2747	0	0	0	0	0.0687	0	0.0687	0
OG0001043	0	0.1349	0	0.2023	0	0	0	0.472	-0.1348	0.0674	0.2023	0	0	0.1349	0	0	0	0	0.0674	0.2023	0	0.2697	0	0.1349	0	0	0.2023	0	0.0674	0
OG0001044	0.1336	0.1336	0	0.2005	0	0	0	0.4677	-0.1336	0.0668	0.0668	0	0	0.1336	0	0	0	0	0.0668	0.2004	0	0.4009	0	0.1336	0	0	0.0668	0	0.0668	0
OG0001045	0	0.1297	0	0.3241	0	0	0	0.5834	-0.1296	0.0648	0.0648	0	0	0.1297	0	0	0	0	0.0648	0.0648	0	0.2593	0	0.2593	0	0	-0.0648	0	0.0648	0
OG0001046	0	0.1393	0	0.209	0	0	0	0.4877	-0.1393	0.0696	0.0696	0	0	0.1393	0	0	0	0	0.0696	0.0696	0	0.2787	0	0	0	0	0.0696	0	0.0696	0
OG0001047	0	0.1387	0	0.2081	0	0	0	0.4854	-0.1387	0.0694	0.0694	0	0	0.1387	0	0	0	0	0.0694	0.0694	0	0.2774	0	0.1387	0	0	-0.0694	0	0.0694	0
OG0001048	0	0.1393	0	0.0697	0	0	0	0.4877	-0.1393	0.0696	0.209	0	0	0.1393	0	0	0	0	0.0696	0.0696	0	0.2787	0	0	0	0	0.0696	0	0.0696	0
OG0001049	0	0	0	0.3333	0	0	0	0.4666	-0.1333	0.0666	0.0666	0	0	0.1333	0	0	0	0	0.0666	0.0666	0	0.2666	0	0.2667	0	0	0.0666	0	0.0666	0.0667
OG0001050	0	0.1367	0	0.205	0	0	0	0.4785	-0.1367	0.0683	0.2051	0	0	0.1367	0	0	0	0	0.0683	0.0683	0	0.2734	0.1367	0.1367	0	0	0.0683	0	0.0683	0
OG0001051	0	0.1387	0	0.2081	0	0	0	0.4854	-0.1387	0.0694	0.0694	0	0	0.1387	0	0	0	0	0.0694	0.0694	0	0.1387	0	0.2774	0	0	0.0694	0	0.0694	0
OG0001052	0	0.1345	0	0.2018	0	0	0	0.4708	-0.1345	0.0672	0.2018	0	0	0.1345	0	0	0	0	0.0672	0.0672	0	0.269	0	0.1345	0	0	0.0672	0	0.2018	-0.0673
OG0001053	0	0.1367	0	0.205	0	0	0.1367	0.4785	-0.1367	0.0683	-0.0683	0	0	0.1367	0.1367	0	0	0	0.0683	0.0683	0.1367	0.2734	0	0.1367	0	0	0.0683	0	0.0683	0
OG0001054	0	0.1373	0	0.206	0	0	0	0.4807	-0.1374	0.0687	0.0687	0	0	0.1373	0	0	0	0	0.0687	0.206	0	0.2747	0	0.1373	0	0	0.0687	0	0.0687	0
OG0001055	0	0	0	0.207	0	0	0	0.4831	-0.138	0.069	0.069	0	0	0.138	0	0	0	0	0.069	0.207	0.138	0.276	0	0	0	0	0.069	0	0.069	0
OG0001056	0	0.1361	0	0.2042	0	0	0.1361	0.4763	-0.1361	0.0681	0.0681	0	0	0.1361	0	0	0	0	0.0681	0.0681	0	0.2722	0	0.2722	0	0	0.0681	0	0.0681	0
OG0001057	0	0	0	0.207	0	0	0	0.4831	-0.138	0.069	0.069	0	0	0.138	0	0	0	0	0.069	0.207	0	0.276	0	0.138	0	0	0.069	0	0.069	0
OG0001058	0	0.138	0	0.207	0	0	0	0.4831	-0.138	0.069	0.069	0	0	0.138	0	0	0	0	0.069	0.207	0	0.276	0	0	0	0	0.069	0	0.069	0
OG0001059	0	0.138	0	0.207	0	0	0	0.4831	-0.138	0.069	0.069	0	0	0.138	0	0	0	0.138	0.069	0.069	0	0.276	0	0.138	0	0	0.069	0	0.069	0
OG0001060	0	0.1387	0	0.2081	0	0	0	0.4854	-0.1387	0.0694	0.0694	0	0	0.1387	0	0	0	0	0.0694	0.0694	0	0.2774	0	0.1387	0	0	0.0694	0	0.0694	0
OG0001061	0	0.138	0	0.207	0	0	0.138	0.4831	-0.138	0.069	0.069	0	0	0.138	0	0	0	0	0.069	0.069	0	0.276	0	0.138	0	0	0.069	0	0.069	0
OG0001062	0	0.1387	0	0.2081	0	0	0	0.4854	-0.1387	0.0694	0.0694	0	0	0.1387	0	0	0	0	0.0694	0.0694	0	0.2774	0	0.1387	0	0	0.0694	0	0.0694	0
OG0001063	0	0.1355	0	0.2032	0	0	0.1355	0.4741	-0.1355	0.0678	-0.0678	0	0	0.1355	0	0.1355	0	0.1355	0.2032	0.0678	0	0.2709	0	0.1355	0	0	0.0678	0	0.0678	0
OG0001064	0	0.1361	0	0.2042	0	0	0.1361	0.4763	-0.1361	0.0681	0.2041	0	0	0.1361	0	0	0	0.1361	0.0681	0.0681	0	0.2722	0	0.1361	0	0	0.0681	0	0.0681	0
OG0001065	0	0.1291	0	0.1937	0	0	0.1291	0.5809	-0.1291	0.0646	0.1936	0.1291	0	0.1291	0	0	0	0	0.0646	0.1936	0	0.2582	0	0.1291	0	0	0.0646	0	0.1936	0
OG0001066	0	0.1373	0	0.206	0	0	0	0.4807	-0.1374	0.0687	0.0687	0	0	0.1373	0	0	0	0	0.206	0.0687	0	0.2747	0	0.1373	0	0	0.0687	0	0.0687	0
OG0001067	0	0.1387	0	0.2081	0	0	0	0.4854	-0.1387	0.0694	0.0694	0	0	0.1387	0	0	0	0	0.0694	0.0694	0	0.2774	0	0.1387	0	0	0.0694	0	0.0694	0
OG0001068	0	0.2649	0	0.1987	0	0	0.1325	0.4636	-0.1325	0.0663	0.1987	0	0	0.1325	0	0	0	0.1325	0.0663	0.1987	0.1325	0.2649	0	0.1325	0	0	0.0663	0	0.0663	0
OG0001069	0	0.1342	0	0.3356	0	0	0.1342	0.4698	-0.1342	0.0671	0.2013	0	0	0.1342	0	0	0	0	0.0671	0.0671	0	0.2685	0	0.1342	0	0	0.0671	0	0.0671	0
OG0001070	0	0.1342	0	0.3356	0	0	0	0.4698	-0.1342	0.0671	0.0671	0	0	0.1342	0	0	0	0	0.0671	0.0671	0	0.2685	0	0.2685	0	0	0.0671	0	0.0671	0
OG0001071	0	0.1355	0	0.3386	0	0	0	0.4741	-0.1355	0.0678	0.0678	0	0	0.1355	0	0	0	0	0.0678	0.0678	0	0.2709	0	0.1355	0	0	0.0678	0	0.0678	0.1355
OG0001072	0	0.138	0	0.207	0	0	0	0.4831	-0.138	0.069	0.069	0	0	0.138	0	0	0	0	0.069	0.069	0	0.276	0	0.138	0	0	0.069	0	0.069	0.138
OG0001073	0	0.1336	0	0.3341	0	0	0	0.4677	-0.1336	0.0668	0.0668	0	0	0.1336	0	0	0	0	0.0668	0.0668	0	0.2673	0	0.2673	0	0	0.0668	0	0.0668	0.1336
OG0001074	0	0.1336	0	0.3341	0	0	0	0.4677	-0.1336	0.0668	0.0668	0	0	0.1336	0	0	0	0	0.0668	0.0668	0	0.2673	0	0.2673	0	0	0.0668	0.1336	0.0668	0
OG0001075	0	0.1349	0	0.2023	0	0	0	0.472	-0.1348	0.0674	0.2023	0	0	0.1349	0.1348	0	0	0	0.0674	0.0674	0	0.2697	0	0.2697	0	0	0.0674	0	0.0674	0
OG0001076	0	0.1349	0	0.3371	0	0	0	0.472	-0.1348	0.0674	-0.0674	0	0	0.1349	0	0	0	0	0.0674	0.2023	0	0.2697	0	0.1349	0	0	0.0674	0	0.0674	0
OG0001077	0	0.1291	0	0.3227	0	0	0	0.4519	-0.1291	0.0646	0.1936	0	0	0.1291	0	0	0	0	0.0646	0.1936	0	0.3873	0	0.2582	0	0	0.0646	0	0.0646	0
OG0001078	0	0.1355	0	0.3386	0	0	0	0.4741	-0.1355	0.0678	0.0678	0	0	0.1355	0	0	0	0	0.0678	0.2032	0	0.2709	0	0	0	0	0.0678	0	0.0678	0
OG0001079	0	0.14	0	0.07	0	0	0	0.4901	-0.14	0.07	0.07	0	0	0.14	0	0	0	0	0.07	0.07	0	0.2801	0	0.14	0	0	0.07	0	0.07	0
OG0001080	0	0.1349	0	0.3371	0	0	0.1348	0.472	-0.1348	0.0674	0.0674	0	0	0.1349	0	0	0	0	0.0674	0.0674	0	0.2697	0	0.1349	0	0	0.0674	0	0.0674	0.1349
OG0001081	0	0.1331	0	0.3326	0	0	0	0.4657	-0.133	0.0665	0.0665	0	0	0.1331	0	0	0	0	0.0665	0.1996	0	0.2661	0	0.2661	0	0	0.0665	0	0.0665	0
OG0001082	0	0.131	0	0.262	0	0	0	0.4586	-0.131	0.0655	0.1965	0	0	0.131	0	0	0	0	0.0655	0.1965	0	0.3931	0	0.262	0	0	0.0655	0.131	0.0655	0
OG0001083	0	0.1345	0	0.2691	0	0	0	0.4708	-0.1345	0.0672	0.0672	0	0	0.1345	0	0	0	0	0.0672	0.2018	0	0.4036	0	0.1345	0	0	0.0672	0	0.0672	0
OG0001084	0	0.1345	0	0.2691	0	0	0	0.4708	-0.1345	0.0672	0.2018	0	0	0.1345	0	0	0	0	0.0672	0.2018	0	0.269	0	0.2691	0	0	0.0672	0	0.0672	0
OG0001085	0	0.1377	0	0.2754	0	0	0	0.4819	-0.1377	0.0689	0.0689	0	0	0.1377	0	0	0	0	0.0689	0.2065	0	0.2754	0	0.1377	0	0	0.0689	0	0.0689	0
OG0001086	0	0.1383	0	0.2767	0	0	0	0.4842	-0.1383	0.0691	0.0691	0	0	0.1383	0	0	0	0.1383	0.0691	0.0691	0	0.2767	0	0.1383	0	0	0.0691	0	0.0691	0
OG0001087	0	0.139	0	0.139	0	0	0	0.4865	-0.139	0.0695	0.2085	0	0	0.139	0	0	0	0.139	0.0695	0.0695	0	0.278	0	0.139	0	0	0.0695	0	0.0695	0
OG0001088	0	0.1411	0	0.1411	0	0	0	0.4938	-0.1411	0.0706	0.0706	0	0	0.1411	0	0	0	0	0.0706	0.0706	0	0.2822	0	0.1411	0	0	0.0706	0	0.0706	0
OG0001089	0	0.1397	0	0.2794	0	0	0	0.4889	-0.1397	0.0699	0.0699	0	0	0.1397	0	0	0	0	0.0699	0.0699	0	0.2794	0	0	0	0	0.0699	0	0.0699	0
OG0001090	0	0.2679	0	0.2679	0	0	0	0.4687	-0.1339	0.0669	0.0669	0	0	0.1339	0	0	0	0	0.0669	0.0669	0	0.4018	0	0.1339	0	0	0.0669	0	0.0669	0
OG0001091	0	0.139	0	0.278	0	0	0	0.4865	-0.139	0.0695	0.0695	0	0	0.139	0	0	0	0	0.0695	0.0695	0	0.278	0	0.139	0	0	0.0695	0	0.0695	0
OG0001092	0	0.1377	0	0.2754	0	0	0	0.4819	-0.1377	0.0689	0.0689	0	0	0.1377	0	0	0	0	0.2065	0.0689	0	0.2754	0	0.1377	0	0	0.0689	0	0.0689	0
OG0001093	0	0.1377	0	0.2754	0	0	0	0.4819	-0.1377	0.2065	0.0689	0	0	0.1377	0	0	0	0	0.0689	0.0689	0	0.2754	0	0.1377	0	0	0.0689	0	0.0689	0
OG0001094	0	0.1377	0	0.2754	0	0	0	0.4819	-0.1377	0.2065	0.0689	0	0	0.1377	0	0	0	0	0.0689	0.0689	0	0.2754	0	0.1377	0	0	0.0689	0	0.0689	0
OG0001095	0	0.139	0	0.278	0	0	0	0.4865	-0.139	0.0695	0.0695	0	0	0.139	0	0	0	0	0.0695	0.0695	0	0.278	0	0.139	0	0	-0.0695	0	0.0695	0
OG0001096	0	0.1383	0	0.2767	0	0	0.1383	0.4842	-0.1383	0.0691	0.0691	0	0	0.1383	0	0	0	0	0.0691	0.0691	0	0.2767	0	0.1383	0	0	0.0691	0	0.0691	0
OG0001097	0	0.139	0	0.278	0	0	0	0.4865	-0.139	0.0695	0.0695	0	0	0.139	0	0	0	0	0.0695	0.0695	0	0.278	0	0.139	0	0	0.0695	0	0.0695	0
OG0001098	0	0.139	0	0.278	0	0	0	0.4865	-0.139	0.0695	0.0695	0	0	0.139	0	0	0	0	0.0695	0.0695	0	0.278	0	0.139	0	0	0.0695	0	0.0695	0
OG0001099	0	0.1358	0	0.2715	0	0	0.1358	0.4752	-0.1358	0.0679	0.2037	0	0	0.1358	0	0	0	0	0.0679	0.2037	0	0.2715	0	0.1358	0	0	0.0679	0	0.0679	0
OG0001100	0	0.1364	0	0.1364	0	0	0.1364	0.4774	-0.1364	0.0682	0.0682	0.1364	0	0.1364	0	0	0	0	0.0682	0.2046	0	0.2728	0	0.2728	0	0	0.0682	0	0.0682	0
OG0001101	0	0.1364	0	0.1364	0	0	0.1364	0.4774	-0.1364	0.0682	0.0682	0	0	0.1364	0	0	0	0	0.0682	0.2046	0.1364	0.2728	0	0.2728	0	0	0.0682	0	0.0682	0
OG0001102	0	0.1351	0	0.1351	0	0	0	0.473	-0.1351	0.2027	0.0675	0	0	0.1351	0	0	0	0	0.0675	0.2027	0	0.2703	0	0.2703	0	0	0.0675	0	0.2027	0
OG0001103	0	0.1383	0	0.1383	0	0	0	0.4842	-0.1383	0.0691	0.0691	0	0	0.1383	0	0	0	0.1383	0.0691	0.0691	0	0.2767	0	0.2767	0	0	0.0691	0	0.0691	0
OG0001104	0	0.1397	0	0.1397	0	0	0	0.4889	-0.1397	0.0699	0.0699	0	0	0.1397	0	0	0	0	0.0699	0.0699	0	0.2794	0	0.1397	0	0	0.0699	0	0.2095	0
OG0001105	0	0.1377	0	0.2754	0	0	0	0.4819	-0.1377	0.0689	0.0689	0	0	0.1377	0	0	0	0	0.0689	0.2065	0	0.2754	0	0.1377	0	0	0.0689	0	0.0689	0
OG0001106	0	0.1364	0	0.1364	0	0	0	0.4774	-0.1364	0.0682	0.0682	0	0	0.1364	0	0	0	0	0.0682	0.2046	0	0.2728	0	0.2728	0	0	0.0682	0	0.2046	0
OG0001107	0	0.1364	0	0.1364	0	0	0	0.4774	-0.1364	0.0682	0.2046	0	0	0.1364	0	0	0	0	0.0682	0.2046	0	0.2728	0	0.2728	0	0	0.0682	0	-0.0682	0
OG0001108	0	0.1358	0	0.2715	0	0	0	0.4752	-0.1358	0.2037	0.0679	0	0	0.1358	0.1358	0	0	0	0.0679	0.0679	0	0.2715	0	0.1358	0	0	0.0679	0	0.2037	0
OG0001109	0	0.139	0	0.139	0	0	0	0.4865	-0.139	0.0695	0.0695	0	0	0.139	0	0.139	0	0	0.0695	0.2085	0	0.278	0	0.139	0	0	0.0695	0	0.0695	0
OG0001110	0	0.1358	0	0.2715	0	0	0	0.4752	-0.1358	0.0679	0.2037	0	0	0.1358	0	0	0	0	0.0679	0.0679	0	0.2715	0	0.2715	0	0	0.0679	0	0.0679	0
OG0001111	0	0.1358	0	0.2715	0	0	0	0.4752	-0.1358	0.0679	0.2037	0	0	0.1358	0	0	0	0	0.0679	0.0679	0	0.2715	0	0.2715	0	0	0.0679	0	-0.0679	0
OG0001112	0	0.1371	0	0.1371	0	0	0.137	0.4797	-0.137	0.0685	0.0685	0	0	0.1371	0	0	0	0	0.0685	0.0685	0	0.4111	0	0.1371	0	0	0.0685	0	-0.0685	0
OG0001113	0	0.1364	0	0.1364	0	0	0	0.4774	-0.1364	0.0682	0.2046	0	0	0.1364	0	0	0	0	0.0682	0.2046	0	0.2728	0	0.2728	0	0	0.0682	0	0.0682	0
OG0001114	0	0.1383	0	0.2767	0	0.1383	0	0.4842	-0.1383	0.0691	0.0691	0	0	0.1383	0	0	0	0	0.0691	0.0691	0	0.2767	0	0.1383	0	0	0.0691	0	-0.0691	0
OG0001115	0	0.1383	0	0.2767	0	0	0	0.4842	-0.1383	0.0691	0.0691	0	0.1383	0.1383	0	0	0	0	0.0691	0.0691	0	0.2767	0	0.1383	0	0	0.0691	0	0.0691	0
OG0001116	0	0.1364	0	0.2728	0	0	0	0.4774	-0.1364	0.0682	0.0682	0	0	0.1364	0	0	0	0	0.0682	0.2046	0	0.2728	0	0.1364	0	0	0.0682	0	0.2046	0
OG0001117	0	0.139	0	0.278	0	0	0	0.4865	-0.139	0.0695	0.0695	0	0	0.139	0	0	0	0	0.0695	0.0695	0	0.278	0	0.139	0	0	0.0695	0	-0.0695	0
OG0001118	0	0.139	0	0.278	0	0	0	0.4865	-0.139	0.0695	0.0695	0	0	0.139	0	0	0	0	0.0695	0.0695	0	0.278	0	0.139	0	0	0.0695	0	0.0695	0
OG0001119	0	0.1351	0	0.2703	0	0	0	0.473	-0.1351	0.0675	0.2027	0	0	0.1351	0	0	0	0	0.0675	0.2027	0	0.2703	0	0.1351	0	0	0.0675	0	0.2027	0
OG0001120	0	0.1377	0	0.2754	0	0	0	0.4819	-0.1377	0.0689	-0.0689	0	0	0.1377	0	0	0	0	0.0689	0.2065	0	0.2754	0	0.1377	0	0	0.0689	0	-0.0689	0
OG0001121	0	0.1345	0	0.2691	0	0	0.1345	0.4708	-0.1345	0.0672	0.2018	0	0	0.1345	0	0	0	0	0.0672	0.2018	0	0.269	0	0.1345	0	0	0.0672	0.1345	-0.0672	0.1345
OG0001122	0	0.1364	0	0.1364	0	0	0	0.4774	-0.1364	0.2046	0.0682	0	0	0.1364	0	0	0	0	0.0682	0.0682	0	0.2728	0	0.2728	0	0	0.0682	0	0.2046	0
OG0001123	0.137	0.1371	0	0.2741	0	0	0	0.4797	0	0.0685	0.2056	0	0	0.1371	0	0	0	0	0.0685	0.0685	0	0.2741	0	0.1371	0	0	0.0685	0	-0.2056	0
OG0001124	0	0.1397	0	0.1397	0	0	0	0.4889	0	0.0699	0.0699	0	0	0.1397	0	0	0	0	0.0699	0.0699	0	0.2794	0	0.1397	0	0	0.2095	0	-0.2095	0
OG0001125	0	0.1411	0	0.1411	0	0	0	0.4938	0	0.0706	0.0706	0	0	0.1411	0	0	0	0	0.0706	0.0706	0	0.2822	0	0.1411	0	0	0.0706	0	-0.2116	0
OG0001126	0	0.1404	0	0.1404	0	0	0	0.4913	0	0.0702	0.0702	0	0	0.1404	0	0	0	0	0.0702	0.0702	0	0.2807	0.1404	0.1404	0	0	0.0702	0	-0.2106	0
OG0001127	0	0.1383	0	0.1383	0	0	0	0.4842	0	0.0691	0.2075	0	0	0.1383	0	0	0	0	0.0691	0.2075	0	0.2767	0	0.1383	0	0	0.0691	0	-0.2075	0
OG0001128	0	0.139	0	0.139	0	0	0	0.4865	0	0.0695	0.2085	0	0	0.139	0	0	0	0	0.0695	0.2085	0.139	0	0	0.139	0	0	0.2085	0	-0.2085	0
OG0001129	0	0	0	0.1404	0	0	0	0.4913	0	0.0702	0.0702	0	0	0.1404	0	0	0	0.1404	0.0702	0.0702	0.1404	0.2807	0	0.1404	0	0	0.0702	0	-0.2106	0
OG0001130	0	0.1407	0	0.1407	0	0	0	0.4925	0	0.0703	0.0703	0	0	0.1407	0	0	0	0	0.0703	0.0703	0	0.2814	0	0.2814	0	0	0.0703	0	0.1407	0
OG0001131	0	0.14	0	0.14	0	0	0	0.4901	0	0.07	0.07	0	0	0.14	0	0	0	0	0.07	0.07	0	0.2801	0	0.2801	0	0	0.07	0	0.14	0.14
OG0001132	0	0.1407	0	0.1407	0	0	0	0.4925	0	0.0703	0.0703	0	0	0.1407	0	0	0	0	0.0703	0.2111	0	0.2814	0	0.1407	0	0	0.0703	0	0.1407	0.1407
OG0001133	0	0.1475	0	0.1475	0	0	0	0.3686	0	0.0737	0.0737	0	0	0.1475	0	0	0	0	0.0737	0.0737	0	0.2949	0	0.1475	0	0	0.0737	0	0.1474	0
OG0001134	0	0.1393	0	0.2787	0	0	0	0.4877	0	0.0696	0.0696	0	0	0.1393	0	0	0	0	0.0696	0.209	0	0.2787	0	0.1393	0	0	0.0696	0	0.1393	0
OG0001135	0	0.1393	0	0.2787	0	0	0	0.4877	0	0.0696	0.0696	0	0	0.1393	0	0	0	0	0.0696	0.209	0	0.2787	0	0.1393	0	0	0.0696	0	0.1393	0
OG0001136	0	0.1404	0	0.2807	0	0	0	0.4913	0	0.0702	0.0702	0.1404	0	0.1404	0	0	0	0	0.0702	0.0702	0	0.3509	0	0.1404	0	0	0.0702	0	0.1404	0
OG0001137	0	0.1411	0	0.1411	0	0	0	0.4938	0	0.0706	0.0706	0	0	0.1411	0	0	0	0	0.0706	0.0706	0	0.3527	0	0.2821	0	0	0.0706	0	0.1411	0
OG0001138	0	0.1443	0	0.1443	0	0	0	0.5052	0	0.0721	0.0721	0	0	0.1443	0	0	0	0	0.0721	0.0721	0	0.2165	0	0.1443	0	0	0.0721	0	0.1443	0.0722
OG0001139	0	0.1436	0	0.1436	0	0	0.1436	0.5026	0	0.0718	0.0718	0	0	0.1436	0	0	0	0	0.0718	0.0718	0	0.2154	0	0.1436	0	0	0.0718	0	0.1436	0.0718
OG0001140	0	0.1383	0	0.1383	0	0	0	0.6225	0	0.0691	0.0691	0	0	0.1383	0	0	0	0	0.0691	0.0691	0	0.2075	0	0.2767	0	0	0.0691	0	0.1383	0
OG0001141	0	0.1483	0	0.1483	0	0	0	0.4448	0	0.0741	0.0741	0	0	0.1483	0	0	0	0	0.0741	0.0741	0	0.3706	0	0.1483	0	0	0.0741	0.1482	0.1482	0
OG0001142	0	0.1459	0	0.1459	0	0	0	0.4376	0	0.073	0.073	0	0	0.1459	0	0	0	0	0.073	0.073	0	0.3647	0	0.2917	0	0	0.073	0.1459	0.1459	0
OG0001143	0	0.1443	0	0.2887	0	0	0	0.433	0	0.0721	0.0721	0	0	0.1443	0	0	0	0	0.0721	0.0721	0	0.3608	0	0.2887	0	0	0.0721	0	0.1443	0
OG0001144	0	0.1483	0	0.1483	0	0	0.1482	0.4448	0	0.0741	0.0741	0	0	0.1483	0	0	0	0	0.0741	0.0741	0	0.3706	0	0.1483	0	0	0.0741	0	0.1482	0
OG0001145	0	0.1483	0	0.2965	0	0	0	0.4448	0	0.0741	0.0741	0	0	0.1483	0	0	0	0	0.0741	0.0741	0	0.2224	0	0.2965	0	0	0.0741	0	0	0
OG0001146	0	0.1507	0	0.3015	0	0	0	0.4522	0	0.0754	0.0754	0	0	0	0	0	0	0	0.0754	0.0754	0	0.2261	0	0.1507	0	0	0.0754	0	0.1508	0
OG0001147	0	0.1483	0	0.2965	0	0	0	0.4448	0	0.0741	0.0741	0	0	0.1483	0	0	0	0	0.0741	0.0741	0	0.2224	0	0.1483	0	0	0.2224	0	0.1482	0
OG0001148	0	0.1499	0	0.2998	0	0	0	0.4497	0	0.0749	0.0749	0	0	0.1499	0	0	0	0	0.0749	0.0749	0	0.2248	0	0.1499	0	0	0.0749	0	0.1499	0
OG0001149	0	0.1499	0	0.2998	0	0	0	0.4497	0	0.0749	0.0749	0	0	0.1499	0	0	0	0	0.0749	0.0749	0	0.2248	0	0.1499	0	0	0.0749	0	0.1499	0
OG0001150	0	0.1467	0	0.2933	0	0	0	0.44	0	0.0733	0.0733	0	0	0.1467	0	0	0	0	0.0733	0.0733	0	0.3666	0	0.1467	0	0	0.0733	0	0.1466	0
OG0001151	0.1466	0.1467	0	0.2933	0	0	0	0.44	0	0.0733	0.0733	0	0	0.1467	0	0	0	0	0.0733	0.0733	0	0.22	0	0.2933	0	0	0.0733	0	0.1466	0
OG0001152	0	0.1483	0	0.1483	0	0	0	0.4448	0	0.0741	0.0741	0	0	0.1483	0	0	0	0	0.0741	0.0741	0	0.3706	0	0.1483	0	0	0.0741	0	0.1482	0.1483
OG0001153	0	0.1491	0	0.1491	0	0	0	0.4472	0	0.2236	0.2236	0	0	0.1491	0	0	0	0	0.0746	0.0746	0	0.2236	0	0.1491	0	0	0.0746	0	0.1491	0
OG0001154	0	0	0	0.3015	0	0	0	0.4522	0	0.0754	0.0754	0	0	0.1507	0	0	0	0	0.0754	0.0754	0	0.2261	0	0.1507	0	0	0.0754	0	0.1508	0
OG0001155	0	0.1499	0	0.2998	0	0	0	0.4497	0	0.0749	0.0749	0	0	0.1499	0	0	0	0	0.0749	0.0749	0	0.2248	0	0.1499	0	0	0.0749	0	0.1499	0
OG0001156	0	0.1443	0	0.2887	0	0	0	0.433	0	0.0721	0.0721	0	0	0.1443	0	0	0	0	0.0721	0.0721	0	0.3608	0	0.2887	0	0	0.0721	0	0.1443	0
OG0001157	0	0.1491	0	0.1491	0	0	0	0.4472	0	0.0746	0.0746	0	0	0.1491	0	0	0	0	0.0746	0.0746	0	0.3727	0	0.1491	0	0	0.0746	0	0.1491	0
OG0001158	0	0.1491	0	0.1491	0	0	0	0.4472	0	0.0746	0.0746	0	0	0.1491	0	0	0	0	0.0746	0.0746	0	0.2236	-0.1491	0.2981	0	0	0.0746	0	0.1491	0
OG0001159	0	0.1516	0	0.1516	0	0	0	0.4549	0	0.0758	0.0758	0	0	0.1516	0	0	0	0	0.0758	0.0758	0	0.2274	-0.1516	0.1516	0	0	0.0758	0	0.1516	0
OG0001160	0	0.1491	0	0.2981	0	0	0	0.4472	0	0.0746	0.0746	0	0	0.1491	0	0	0	0	0.0746	0.0746	0	0.2236	-0.1491	0.1491	0	0	0.0746	0	0.1491	0
OG0001161	0	0.1525	0	0.1525	0	0	0	0.4575	0	0.0763	0.0763	0	0	0.1525	0	0	0	0	0.0763	0.0763	0	0.2288	-0.1525	0.1525	0	0	0.0763	0	0	0
OG0001162	0	0.1499	0	0.1499	0	0	0	0.4497	0	0.2249	0.0749	0	0	0.1499	0	0	0	0	0.0749	0.0749	0	0.2248	-0.1499	0.1499	0	0	0.0749	0	0.1499	0
OG0001163	0	0.1491	0	0.2981	0	0	0	0.4472	0	0.0746	0.0746	0	0	0.1491	0	0	0	0	0.0746	0.0746	0	0.2236	-0.1491	0.1491	0	0	0.0746	0	0.1491	0
OG0001164	0	0.1475	0	0.2949	0	0	0	0.4423	0	0.2212	0.0737	0	0	0.1475	0	0	0	0	0.0737	0.0737	0	0.2212	-0.1474	0.1475	0	0	0.0737	0	0.1474	0
OG0001165	0	0.1418	0	0.2836	0	0	0	0.4253	0	0.0709	0.0709	0	0	0.1418	0	0	0	0	0.0709	0.0709	0	0.3544	-0.1418	0.2836	0	0	0.0709	0	0.1418	-0.0709
OG0001166	0	0.1447	0	0.2894	0	0	0	0.4341	0	0.0723	0.0723	0	0	0.1447	0	0	0	0	0.0723	0.0723	0	0.3618	-0.1447	0	0	0	-0.0723	0	0.1447	-0.0724
OG0001167	0	0.1447	0	0.2894	0	0	0	0.4341	0	0.0723	0.0723	0	0	0.1447	0	0	0	0	0.0723	0.0723	0	0.3618	-0.1447	0	0	0	0.0723	0	0.1447	-0.0724
OG0001168	0	0.1463	0	0.1463	0	0	0	0.4388	0	0.0732	0.0732	0	0	0.1463	0	0	0	0	0.0732	0.0732	0	0.3656	-0.1463	0.1463	0	0	0.0732	0	0.1463	-0.0731
OG0001169	0	0.1439	0	0.2879	0	0	0	0.4319	0	0.072	0.072	0	0	0.1439	0	0	0	0	0.072	0.072	0	0.3599	-0.144	0.1439	0	0	0.072	0	0.144	-0.0719
OG0001170	0	0.1463	0	0.1463	0	0	0	0.4388	0	0.0732	0.0732	0	0	0.1463	0	0	0	0	0.0732	0.0732	0	0.3656	-0.1463	0.1463	0	0	0.0732	0	0.1463	-0.0731
OG0001171	0	0.1479	0	0.2957	0	0	0	0.4436	0	0.0739	0.0739	0	0	0.1479	0	0	0	0	0.0739	0.0739	0	0.2218	-0.1478	0	0	0	0.0739	0	0.1478	-0.074
OG0001172	0	0.1463	0	0.1463	0	0	0	0.4388	0	0.0732	0.0732	0	0	0.1463	0	0	0	0	0.0732	0.0732	0	0.2194	-0.1463	0.2925	0.1463	0	0.0732	0	0.1463	-0.0731
OG0001173	0	0.278	0	0.139	0	0	0	0.556	0	0.0695	0.0695	0	0	0.139	0	0	0	0	0.0695	0.0695	0	0.3475	-0.139	0.139	0	0	0.0695	0	0.139	-0.0695
OG0001174	0	0.2981	0	0.1491	0	0	0	0.4472	0	0.0746	0.0746	0	0	0.1491	0	0	0	0	-0.0746	0.0746	0	0.2236	-0.1491	0.1491	0	0	0.0746	0	0.1491	0
OG0001175	0	0.1429	0	0.2857	0	0	0.1429	0.5714	0	0.0715	0.0715	0	0	0.1429	0	0	0	0	0.0715	0.0715	0	0.2143	-0.1429	0.1429	0	0	0.0715	0	0.1429	0
OG0001176	0	0.1475	0	0.2949	0	0	0	0.4423	0	0.0737	0.0737	0	0	0.1475	0.1474	0	0	0	0.0737	0.0737	0	0.2212	-0.1474	0.1475	0	0	0.0737	0.1474	0.1474	0
OG0001177	0	0.1491	0	0.2981	0	0	0	0.4472	0	0.0746	0.0746	0	0	0.1491	0	0	0	0	0.0746	0.0746	0	0.2236	-0.1491	0.1491	0	0	0.0746	0	0	0.1491
OG0001178	0	0.2949	0	0.2949	0	0	0	0.4423	0	0.0737	0.0737	0	0	0.1475	0	0	0	0	0.0737	0.0737	0	0.2212	-0.1474	0.1475	0	0	0.0737	0	0	0
OG0001179	0	0	0	0.2981	0	0	0	0.4472	0	0.0746	0.0746	0	0	0.1491	0	0	0	0.1491	0.0746	0.0746	0	0.2236	-0.1491	0.1491	0	0	0.0746	0	0.1491	0
OG0001180	0	0.1471	0	0.2941	0	0	0	0.4412	0	0.0735	0.0735	0	0	0.1471	0	0	0	0	0.0735	0.0735	0	0.2206	-0.147	0.1471	0	0	0.0735	0	0.147	-0.0736
OG0001181	0	0.1463	0	0.2925	0	0	0.1463	0.4388	0	0.0732	0.0732	0	0	0.1463	0	0	0	0	0.0732	0.0732	0	0.2194	-0.1463	0.1463	0	0	0.0732	0	0.1463	-0.0731
OG0001182	0	0.1463	0	0.2925	0	0	0	0.4388	0	0.0732	0.0732	0	0	0.1463	0	0	0	0.1463	0.0732	0.0732	0	0.2194	-0.1463	0.1463	0	0	0.0732	0	0.1463	-0.0731
OG0001183	0	0.1507	0	0.1507	0	0	0	0.4522	0	0.0754	0.0754	0	0	0.1507	0	0	0	0	0.0754	0.0754	0	0.2261	-0.1508	0.1507	0	0	0.0754	0	0.1508	0.1507
OG0001184	0	0.1499	0	0.2998	0	0	0	0.4497	0	0.0749	0.0749	0	0	0.1499	0	0	0	0	0.0749	0.0749	0	0.2248	-0.1499	0.1499	0	0	0.0749	0	0	0
OG0001185	0	0.1467	0	0.2933	0	0	0	0.44	0	0.0733	0.0733	0	0	0.1467	0	0	0	0	0.0733	0.0733	0	0.22	-0.1466	0.2933	0	0	0.0733	0	0.1466	0
OG0001186	0	0.1467	0	0.2933	0	0	-0.1466	0.44	0	0.0733	0.0733	0	0	0	0	0	0	0	0.0733	0.0733	0	0.3666	-0.1466	0.1467	0	0	0.0733	0	0	0
OG0001187	0	0.1491	0	0.2981	0	0	-0.1491	0.4472	0	0.0746	0.0746	0	0	0	0	0	0	0	0.0746	0.0746	0	0.2236	-0.1491	0.1491	0	0	0.0746	0	0.1491	0
OG0001188	0	0.1483	0	0.2965	0	0	-0.1482	0.4448	0	0.0741	0.0741	0	0	0.1483	0	0	0	0	0.0741	0.0741	0	0.2224	-0.1482	0.1483	0	0	0.0741	0	0.1482	0
OG0001189	0	0.1459	0	0.1459	0	0	-0.1459	0.5835	0	0.073	0.073	0	0	0.1459	0	0	0	0	0.073	0.073	0	0.2188	-0.1459	0.1459	0	0	0.073	0	0	0
OG0001190	0	0.1443	0	0.1443	0	0	-0.1443	0.5774	0	0.0721	0.0721	0	0	0.1443	0	0	0	0.1443	0.0721	0.0721	0	0.2165	-0.1443	0.1443	0	0	0.0721	0	0.1443	0
OG0001191	0	0.1407	0	0.2814	0	0	-0.1407	0.5629	0	0.0703	0.0703	0	0	0.1407	0	0	0	0	0.0703	0.0703	0	0.211	-0.1407	0.2814	0	0	0.0703	0	0.1407	0
OG0001192	0	0.1475	0	0.1475	0	0	-0.1474	0.4423	0	0.0737	0.0737	0	0	0.1475	0	0	0	0	0.0737	0.0737	0	0.3686	-0.1474	0.1475	0	0	0.0737	0	0.1474	0
OG0001193	0	0.1436	0	0.2872	0	0	-0.1436	0.4308	0	0.0718	0.0718	0	0	0.1436	0	0	0	0	0.0718	0.0718	0	0.359	-0.1436	0.1436	0	0	0.2154	0	0.1436	0
OG0001194	0	0.1516	0	0.1516	0	0	-0.1516	0.4549	0	0.0758	0.0758	0	0	0.1516	0	0	0	0	0.0758	0.0758	0	0.2274	-0.1516	0.1516	0	0	0.0758	0	0	0
OG0001195	0	0.1483	0	0.1483	0	0	-0.1482	0.4448	0	0.0741	0.0741	0.1482	0	0.1483	0	0	0	0	0.2224	0.0741	0	0.2224	-0.1482	0.1483	0	0	0.0741	0	0.1482	0
OG0001196	0	0.1475	0	0.1475	0	0	-0.1474	0.4423	0	0.0737	0.0737	0.1474	0	0.1475	0	0	0	0	0.0737	0.0737	0	0.2212	-0.1474	0.2949	0	0	0.0737	0	0.1474	0
OG0001197	0	0.1459	0	0.2917	0	0	-0.1459	0.4376	0	0.073	0.2188	0	0	0.1459	0.1459	0	0	0	0.073	0.073	0	0.2188	-0.1459	0.1459	0	0	0.073	0	0.1459	0
OG0001198	0	0.1483	0	0.2965	0	0	-0.1482	0.4448	0	0.0741	0.0741	0	0	0.1483	0	0	0	0	0.0741	0.0741	0	0.2224	-0.1482	0.1483	0	0	0.0741	0	0.1482	0
OG0001199	0	0.1483	0	0.2965	0	0	-0.1482	0.4448	0	0.0741	0.0741	0	0	0.1483	0	0	0	0	0.0741	0.0741	0	0.2224	-0.1482	0.1483	0	0	0.0741	0	0.1482	0
OG0001200	0	0.1483	0	0.2965	0	0	-0.1482	0.4448	0	0.0741	0.0741	0	0	0.1483	0	0	0	0	0.0741	0.0741	0	0.2224	-0.1482	0.1483	0	0	0.0741	0	0.1482	0
OG0001201	0	0.1475	0	0.1475	0	0	-0.1474	0.4423	0	0.0737	0.0737	0	0	0.1475	0	0	0	0	0.0737	0.0737	0	0.3686	-0.1474	0.1475	0	0	0.0737	0	0.1474	0
OG0001202	0	0.1443	0	0.2887	0	0	-0.1443	0.433	0	0.0721	0.0721	0	0	0.1443	0	0	0	0	0.0721	0.0721	0.1443	0.3608	-0.1443	0.1443	0	0	0.0721	0	0.1443	0
OG0001203	0	0.1552	0	0.1552	0	0	-0.1552	0.3105	0	0.0776	0.0776	0	0	0.1552	0	0	0	0	0.0776	0.0776	0	0.2329	-0.1552	0.1552	0	0	0.0776	0	0.1552	0
OG0001204	0	0.1451	0	0.2902	0	0	-0.1451	0.4353	0	0.0726	0.0726	0	0	0.1451	0	0	0	0	0.0726	0.0726	0	0.3627	-0.1451	0.1451	0	0	0.0726	0	0.1451	0
OG0001205	0	0.1483	0	0.2965	0	0	-0.1482	0.4448	0	0.0741	0.0741	0	0	0.1483	0	0	0	0	0.0741	0.0741	0	0.2224	-0.1482	0.1483	0	0	0.0741	0	0.1482	0
OG0001206	0	0.1475	0	0.1475	0	0	-0.1474	0.4423	0	0.0737	0.0737	0	0	0.1475	0	0	0	0	0.0737	0.0737	0	0.3686	-0.1474	0.1475	0	0	0.0737	0	0.1474	0
OG0001207	0	0.1487	0	0.1487	0	0	-0.1487	0.446	0	0.0744	-0.0744	0	0	0.1487	0	0	0	0	0.0744	0.0744	0	0.3716	-0.1487	0.1487	0	0	0.0744	0	0.1487	0.0744
OG0001208	0	0.1459	0	0.2917	0	0	-0.1459	0.4376	0	0.073	0.073	0	0	0.1459	0	0	0	0	0.073	0.073	0	0.3647	-0.1459	0.1459	0	0	0.073	0	0	0
OG0001209	0	0.1475	0	0.1475	0	0	-0.1474	0.4423	0	0.0737	0.0737	0	0	0.1475	0	0	0	0	0.0737	0.0737	0	0.3686	-0.1474	0.1475	0	0	0.0737	0	0.1474	0
OG0001210	0	0.1429	0	0.2857	0	0	-0.1429	0.5714	0	0.0715	0.0715	0	0	0.1429	0	0	0	0	0.0715	0.0715	0	0.2143	-0.1429	0.1429	0	0	0.0715	0	0.1429	0
OG0001211	0	0.1491	0	0.1491	0	0	-0.1491	0.4472	0	0.0746	0.2236	0	0	0.1491	0	0	0	0	0.0746	0.0746	0	0.2236	-0.1491	0.1491	0	0	0.0746	0	0.1491	0
OG0001212	0	0.1436	0	0.2872	0	0	-0.1436	0.4308	0	0.0718	0.2154	0	0	0.1436	0	0	0	0.1436	0.0718	0.0718	0	0.2154	-0.1436	0.2872	0	0	0.0718	0	0.1436	0
OG0001213	0	0.1467	0	0.2933	0	0	-0.1466	0.44	0	0.0733	0.22	0	0	0.1467	0	0	0	0	0.0733	0.0733	0	0.22	-0.1466	0.1467	0	0	0.0733	0	0.1466	0
OG0001214	0	0.1443	0	0.2887	0	0	-0.1443	0.433	0	0.0721	0.0721	0	0	0.1443	0.1443	0	0	0	0.0721	0.0721	0	0.3608	-0.1443	0.1443	0	0	0.0721	0	0.1443	0
OG0001215	0.1451	0.1451	0	0.2902	0	0	-0.1451	0.4353	0	0.0726	0.0726	0	0	0.1451	0	0	0	0	0.0726	0.0726	0	0.2177	-0.1451	0.2902	0	0	0.0726	0	0.1451	0
OG0001216	0	0.1483	0	0.1483	0	0	-0.1482	0.4448	0	0.0741	0.2224	0	0	0.1483	0	0	0	0	0.0741	0.0741	0.1482	0.2224	-0.1482	0.1483	0	0	0.0741	0	0.1482	0
OG0001217	0	0.1491	0	0.1491	0	0	-0.1491	0.4472	0	0.0746	0.2236	0	0	0.1491	0	0	0	0	0.0746	0.0746	0	0.2236	-0.1491	0.1491	0	0	0.0746	0	0.1491	0
OG0001218	0	0.1459	0	0.1459	0	0	-0.1459	0.4376	0	0.073	0.2188	0	0	0.1459	0	0	0	0	0.073	0.073	0	0.3647	-0.1459	0.1459	0	0	0.073	0	0.1459	0
OG0001219	0	0.1467	0	0.1467	0	0	-0.1466	0.44	0	0.0733	0.22	0	0	0.1467	0	0	0	0	0.0733	-0.0733	0	0.22	-0.1466	0.2933	0	0	0.0733	0	0.1466	0
OG0001220	0	0.1483	0	0.2965	0	0	-0.1482	0.4448	0	0.0741	-0.0741	0	0	0.1483	0	0	0	0	0.0741	0.0741	0	0.2224	-0.1482	0.1483	0	0	0.0741	0	0.1482	0
OG0001221	0	0.1507	0	0.1507	0	0	-0.1508	0.4522	0	0.0754	-0.0754	0	0	0.1507	0	0	0	0	0.0754	0.0754	0	0.2261	-0.1508	0.1507	0	0	0.0754	0	0.1508	0
OG0001222	0	0.1507	0	0.1507	0	0	-0.1508	0.4522	0	0.0754	0.0754	0	0	0.1507	0	0	0	0	0.0754	0.0754	0	0.2261	-0.1508	0.1507	0	0	0.0754	0	0.1508	0
OG0001223	0	0.1507	0	0.1507	0	0	-0.1508	0.4522	0	0.0754	-0.0754	0	0	0.1507	0	0	0	0	0.0754	0.0754	0	0.2261	-0.1508	0.1507	0	0	0.0754	0	0.1508	0
OG0001224	0	0.1483	0	0.2965	0	0	-0.1482	0.4448	0	0.0741	-0.0741	0	0	0.1483	0	0	0	0	0.0741	0.0741	0	0.2224	-0.1482	0.1483	0	0	0.0741	0	0.1482	0
OG0001225	0	0.1467	0	0.2933	0	0	-0.1466	0.44	0	0.0733	-0.22	0	0	0.1467	0	0	0	0	0.0733	-0.0733	0	0.22	-0.1466	0.1467	0	0	0.0733	0	0.1466	0
OG0001226	0	0.1443	0	0.2887	0	0	-0.1443	0.433	0	0.0721	-0.2165	0	0	0.1443	0	0	0	0	0.0721	0.0721	0	0.3608	-0.1443	0.1443	0	0	-0.0721	0	0	0
OG0001227	0	0.1443	0	0.2887	0	0	-0.1443	0.433	0	0.0721	-0.2165	0	0	0.1443	0	0	0	0	0.0721	0.0721	0	0.2165	-0.1443	0.2887	0	0	0.0721	0	0.1443	0
OG0001228	0	0.1443	0	0.2887	0	0	-0.1443	0.433	0	0.0721	-0.2165	0	0	0.1443	0	0	0	0	0.0721	0.0721	0	0.2165	-0.1443	0.2887	0	0	0.0721	0	0.1443	0
OG0001229	0	0.2887	0	0.1443	0	0	-0.1443	0.433	0	0.0721	-0.2165	0	0	0.1443	0	0	0	0	0.0721	0.0721	0	0.2165	-0.1443	0.2887	0	0	0.0721	0	0.1443	0
OG0001230	0	0.1459	0	0.1459	0	0	-0.1459	0.4376	0	0.073	-0.2188	0	0	0.1459	0	0	0	0	0.073	0.073	0	0.3647	-0.1459	0.1459	0	0	0.073	0	0.1459	0
OG0001231	0	0.1467	0	0.2933	0	0	-0.1466	0.44	0	0.0733	-0.22	0	0	0.1467	0	0	0	0	0.0733	0.0733	0	0.22	-0.1466	0.1467	0	0	0.0733	0	0.1466	0
OG0001232	0	0.1432	0	0.1432	0	0	-0.1432	0.5729	0	0.0716	0	0	0	0.1432	0	0	0	0	0.0716	0.0716	0	0.3581	-0.1432	0.1432	0	0	0.0716	0	0.1432	0
OG0001233	0	0.1521	0	0	0	0	-0.1521	0.4562	0	0.0761	0.1521	0	0	0.1521	0	0	0	0	0.0761	0.0761	0	0.2281	-0.1521	0.1521	0	0	0.0761	0	0.1521	0
OG0001234	0	0.1495	0	0.1495	0	0	-0.1495	0.4485	0	0.0748	0.1495	0.1495	0	0.1495	0.1495	0	0	0	0.0748	0.0748	0	0.2243	-0.1495	0.1495	0	0	0.0748	0	0.1495	0
OG0001235	0	0.1487	0	0.1487	0	0	-0.1487	0.446	0	0.0744	0.1487	0	0	0.1487	0	0	0	0	0.0744	0.0744	0	0.223	-0.1487	0.2973	0.1487	0	0.0744	0	0	0
OG0001236	0.1447	0.1447	0	0.2894	0	0	-0.1447	0.4341	0	0.0723	0.1447	0	0	0.1447	0	0	0.1447	0	0.0723	0.0723	0	0.3618	-0.1447	0.1447	0	0	0.0723	0	0	0
OG0001237	0	0.1521	0	0.1521	0	0	-0.1521	0.4562	0	0.0761	0.1521	0	0	0.1521	0	0	0	0	0.0761	0.0761	0	0.2281	-0.1521	0.1521	0	0	0.0761	0	0	0
OG0001238	0	0.1443	0	0.1443	0	0	-0.1443	0.433	0	0.0721	0.1443	0	0	0.1443	0	0	0	0	0.0721	0.0721	0	0.3608	-0.1443	0.2887	0	0	0.0721	0	0	0.0722
OG0001239	0	0.1463	0	0.1463	0	0	-0.1463	0.4388	0	0.0732	0.1463	0	0	0.1463	0	0	0	0	0.0732	0.0732	0	0.3656	-0.1463	0.2925	0	0	0.0732	0	0	0
OG0001240	0	0.1425	0	0.1425	0	0	-0.1425	0.57	0	0.0713	0.1425	0	0	0.1425	0	0	0	0	0.0713	0.0713	0	0.3562	-0.1425	0.1425	0	0	0.0713	0	0.1425	0
OG0001241	0	0.1471	0	0.1471	0	0.147	-0.147	0.4412	0	0.0735	0.147	0	0	0.1471	0	0	0	0	0.0735	0.0735	0	0.3676	-0.147	0.1471	0	0	0.0735	0	0.147	0
OG0001242	0	0.1495	0	0.1495	0	0.1495	-0.1495	0.4485	0	0.0748	0.1495	0	0	0.1495	0	0	0	0	0.0748	0.0748	0.1495	0.2243	-0.1495	0.1495	0	0	0.0748	0	0.1495	0
OG0001243	0	0.1487	0	0.2973	0	0	-0.1487	0.446	0	0.0744	0.1487	0	0	0.1487	0	0	0	0	0.0744	0.0744	0.1487	0.223	-0.1487	0.1487	0	0	0.0744	0	0	0
OG0001244	0	0	0	0.299	0	0	-0.1495	0.4485	0	0.0748	0.1495	0	0	0.1495	0	0	0	0	0.0748	0.0748	0.1495	0.2243	-0.1495	0	0	0	0.0748	0	0.1495	0
OG0001245	0	0.1487	0	0.2973	0	0	-0.1487	0.446	0	0.0744	0.1487	0	0	0.1487	0	0	0	0	0.0744	0.0744	0	0.223	-0.1487	0.1487	0	0	0.0744	0	0.1487	0
OG0001246	0	0.1463	0	0.2925	0	0	-0.1463	0.4388	0	0.0732	0.1463	0	0	0.1463	0	0	0	0	0.0732	0.0732	0	0.3656	-0.1463	0	0	0	0.0732	0	0.1463	0
OG0001247	0	0.1432	0	0.2864	0	0	-0.1432	0.5729	0	0.0716	0.1432	0	0	0.1432	0	0	0	0	0.0716	0.0716	0	0.2148	-0.1432	0.1432	0	0	0.0716	0	0.1432	0
OG0001248	0	0.1576	0	0.3152	0	0	-0.1576	0.1577	0	0.0788	0	0	0	0.1576	0	0	0	0	0.0788	0.0788	0	0.2364	-0.1576	0.1576	0	0	0.0788	0	0	0
OG0001249	0	0.1432	0	0.2864	0	0	-0.1432	0.5729	0	0.0716	0	0	0	0.1432	0	0	0	0.1432	0.0716	0.0716	0	0.2148	-0.1432	0.1432	0	0	0.0716	0	0.1432	0
OG0001250	0	0.1479	0	0.1479	0	0	-0.1478	0.4436	0	0.0739	0.1478	0	0	0.1479	0	0	0	0	0.0739	0.0739	0	0.3696	-0.1478	0.1479	0	0	0.0739	0	0.1478	0
OG0001251	0.1455	0.1455	0	0.291	0	0	-0.1455	0.4365	0	0.0728	0.1455	0	0	0.1455	0	0	0	0	0.0728	0.0728	0	0.2183	-0.1455	0.291	0	0	0.0728	0	0.1455	0
OG0001252	0	0.1425	0	0.1425	0	0	-0.1425	0.57	0	0.0713	0.1425	0.1425	0	0.1425	0	0	0	0	0.0713	0.0713	0	0.2138	-0.1425	0.285	0	0	0.0713	0	0.1425	0
OG0001253	0	0.1404	0	0.2807	0	0	-0.1404	0.5615	0	0.0702	0.1404	0	0	0.1404	0	0	0	0	0.0702	0.0702	0	0.3509	-0.1404	0.1404	0	0	0.0702	0	0.1404	0
OG0001254	0.1487	0.1487	0	0.2973	0	0	-0.1487	0.446	0	0.0744	0.1487	0	0	0.1487	0	0	0	0	0.0744	0.0744	0	0.223	-0.1487	0	0	0	0.0744	0	0.1487	0
OG0001255	0	0.1455	0	0.291	0	0	-0.1455	0.4365	0	0.0728	0.1455	0	0	0.1455	0	0	0	0	0.0728	0.0728	0.1455	0.3637	-0.1455	0	0	0	0.0728	0	0.1455	0
OG0001256	0	0.1503	0	0.3007	0	0	-0.1503	0.451	0	0.0751	0.1503	0	0	0.1503	0	0	0	0	0.0751	0.0751	0	0.0752	-0.1503	0.1503	0	0	0.0751	0	0.1503	0
OG0001257	0	0.1463	0	0.2925	0	0	-0.1463	0.4388	0	0.0732	0.1463	0	0	0.1463	0	0	0	0	0.0732	0.0732	0	0.3656	-0.1463	0.1463	0	0	0.0732	0	0	0
OG0001258	0	0.1539	0	0.1539	0	0	-0.1538	0.4616	0	0.0769	0.1538	0	0	0.1539	0	0	0	0	0.0769	0.0769	0	0.2308	0	0.1539	0	0	0.0769	0	0	0
OG0001259	0	0.1539	0	0.1539	0	0	-0.1538	0.4616	0	0.0769	0.1538	0	0	0.1539	0	0	0	0	0.0769	0.0769	0	0.2308	0	0.1539	0	0	0.0769	0	0	0
OG0001260	0	0.1447	0	0.1447	0	0	-0.1447	0.5789	0	0.0723	0.1447	0	0	0.1447	0	0	0	0	0.0723	0.0723	0	0.3618	0	0.1447	0	0	0.0723	0	0	0
OG0001261	0.147	0.1471	0	0.2941	0	0	-0.147	0.4412	0	0.0735	0.147	0	0	0.1471	0	0	0	0	0.0735	0.0735	0	0.3676	0	0.1471	0	0	0.0735	0	0	0
OG0001262	0	0.1471	0	0.2941	0	0	-0.147	0.4412	0	0.0735	0.147	0	0	0.1471	0	0	0	0	0.0735	0.0735	0	0.3676	0	0.1471	0	0	0.0735	0	0.147	0
OG0001263	0	0.1529	0	0.1529	0	0	-0.1529	0.4588	0	0.0764	0.1529	0	0	0.1529	0	0	0	0	0.0764	0.0764	0	0.2294	0	0.1529	0	0	0.0764	0	0.1529	0
OG0001264	0	0	0	0.3041	0	0	-0.1521	0.4562	0	0.0761	0.1521	0	0	0.1521	0	0	0	0	0.0761	0.0761	0	0.2281	0	0.1521	0	0	0.0761	0	0	0
OG0001265	0	0.1521	0	0.1521	0	0	-0.1521	0.4562	0	0.0761	0.1521	0	0	0.1521	0	0	0	0	0.0761	0.2281	0	0.2281	0	0.1521	0	0	0.0761	0	0	0
OG0001266	0	0.1495	0	0.299	0	0	-0.1495	0.4485	0	0.0748	0.1495	0	0	0.1495	0	0	0	0	0.0748	0.2242	0	0.2243	0	0.1495	0	0	0.0748	0	0	0
OG0001267	0	0.1521	0	0.1521	0	0	-0.1521	0.4562	0	0.0761	0	0	0	0.1521	0	0	0	0	-0.0761	0.0761	0	0.2281	0	0.3041	0	0	0.0761	0	0	0
OG0001268	0	0.1521	0	0.3041	0	0	-0.1521	0.4562	0	0.0761	0	0	0	0.1521	0	0	0	0	0.0761	0.0761	0	0.2281	0	0.1521	0	0	0.0761	0	0	0
OG0001269	0	0.1512	0	0.3024	0	0	-0.1512	0.4536	0	0.0756	0.1512	0	0	0.1512	0	0	0	0	0.0756	-0.0756	0	0.2268	0	0.1512	0	0	0.0756	0	0	0
OG0001270	0	0.1455	0	0.291	0	0	-0.1455	0.5819	0	0.0728	0.1455	0	0	0.1455	0	0	0	0	0.0728	0.0728	0	0.2183	0	0.1455	0	0	0.0728	0	0	0
OG0001271	0	0.1503	0	0.3007	0	0	-0.1503	0.451	0	0.0751	0.1503	0	0	0.1503	0	0	0	0	0.0751	0.0751	0	0.2255	0	0.1503	0	0	0.0751	0	0.1503	0
OG0001272	0	0.1495	0	0.299	0	0	-0.1495	0.4485	0	0.0748	0.1495	0	0	0.1495	0	0	0	0	0.0748	0.0748	0.1495	0.2243	0	0.1495	0	0	0.0748	0	0.1495	0
OG0001273	0	0.1512	0	0.3024	0	0	-0.1512	0.4536	0	0.0756	0	0	0	0.1512	0	0	0	0	0.0756	0.0756	0	0.2268	0	0.1512	0	0	0.0756	0	0	0.1512
OG0001274	0	0.1539	0	0.1539	0	0	-0.1538	0.4616	0	0.0769	0	0	0	0.1539	0	0	0	0	0.0769	0.0769	0.1538	0.2308	0	0.1539	0	0	0.0769	0	0	0
OG0001275	0	0.1512	0	0.3024	0	0	-0.1512	0.4536	0	0.0756	0.1512	0	0	0.1512	0	0	0	0	0.0756	0.0756	0	0.2268	0	0.1512	0	0	0.0756	0	0	0
OG0001276	0	0.3041	0	0.1521	0	0	-0.1521	0.4562	0	0.0761	0.1521	0	0	0	0	0	0	0	0.0761	0.0761	0	0.2281	0	0.1521	0	0	0.0761	0	0	0
OG0001277	0	0.1539	0	0.1539	0	0	-0.1538	0.4616	0	0.0769	0.1538	0	0	0.1539	0	0	0	0	0.0769	0.0769	0	0.2308	0	0.1539	0	0	0.0769	0	0	0
OG0001278	0	0.1529	0	0.1529	0	0	-0.1529	0.4588	0	0.0764	0.1529	0	0	0.1529	0	0	0	0	0.0764	0.0764	0	0.2294	0	0.1529	0	0	-0.0764	0	0.1529	0
OG0001279	0	0.1529	0	0.1529	0	0	-0.1529	0.4588	0	0.0764	0.1529	0	0	0.1529	0	0	0	0	0.0764	0.0764	0	0.2294	0	0.1529	0	0	0.0764	0	0.1529	0
OG0001280	0	0.1507	0	0.1507	0	0	-0.1508	0.4522	0	0.0754	0.1508	0	0	0.1507	0	0	0	0	0.0754	0.0754	0	0.2261	0	0.1507	0	0	0.0754	0	0.1508	-0.0753
OG0001281	0	0.1529	0	0.1529	0	0	-0.1529	0.4588	0	0.0764	0.1529	0	0	0.1529	0	0	0	0	0.0764	0.0764	0	0.2294	0	0.1529	0	0	0.0764	0	0.1529	0
OG0001282	0	0.1503	0	0.3007	0	0	-0.1503	0.451	0	0.0751	0.1503	0	0	0.1503	0	0	0	0	0.0751	0.0751	0	0.2255	0	0.1503	0	0	0.0751	0	0.1503	0
OG0001283	0	0.1512	0	0.3024	0	0	-0.1512	0.4536	0	0.0756	0	0	0	0.1512	0	0	0	0	0.0756	0.0756	0	0.2268	0	0.1512	0	0	0.0756	0	0.1512	0
OG0001284	0	0.1503	0	0.3007	0	0	-0.1503	0.451	0	0.0751	0.1503	0	0	0.1503	0	0	0	0	0.0751	0.0751	0	0.2255	0	0.1503	0	0	0.0751	0	0.1503	0
OG0001285	0	0.1512	0	0.3024	0	0	-0.1512	0.4536	0	0.0756	0	0	0	0.1512	0	0	0	0	0.0756	0.0756	0	0.2268	0	0.1512	0	0	0.0756	0	0.1512	0
OG0001286	0	0.1503	0	0.3007	0	0	-0.1503	0.451	0	0.0751	0.1503	0	0	0.1503	0	0	0	0	0.0751	0.0751	0	0.2255	0	0.1503	0	0	0.0751	0	0.1503	0
OG0001287	0	0.1503	0	0.1503	0	0	-0.1503	0.451	0	0.0751	0.1503	0	0	0.1503	0	0	0	0	0.0751	0.0751	0	0.2255	0	0.3007	0	0	0.0751	0	0.1503	0
OG0001288	0	0.1539	0	0.1539	0	0	-0.1538	0.4616	0	0.0769	0	0	0	0.1539	0	0	0	0	0.0769	0.0769	0	0.2308	0	0.1539	0	0	0.0769	0	0.1538	0
OG0001289	0	0.1503	0	0.3007	0	0	-0.1503	0.451	0	0.0751	0.1503	0	0	0.1503	0	0	0	0	0.0751	0.0751	0	0.2255	0	0.1503	0	0	0.0751	0	0.1503	0
OG0001290	0	0.1495	0	0.299	0	0	-0.1495	0.4485	0	0.0748	0.1495	0	-0.1495	0.1495	0	0	0	0	0.0748	0.0748	0	0.2243	0	0.1495	0	0	0.0748	0	0.1495	0
OG0001291	0	0.1495	0	0.299	0	0	-0.1495	0.4485	0	0.0748	0.1495	0	-0.1495	0.1495	0	0	0	0	0.0748	0.0748	0	0.2243	0	0.1495	0	0	0.0748	0	0.1495	0
OG0001292	0	0.1487	0	0.1487	0	0	-0.1487	0.446	0	0.223	0.1487	0	-0.1487	0	0	0	0	0	0.0744	0.0744	0	0.223	0	0.2973	0	0	0.0744	0	0.1487	0
OG0001293	0	0.1487	0	0.1487	0	0	-0.1487	0.446	0	0.223	0.1487	0	-0.1487	0	0	0	0	0	0.0744	0.0744	0	0.223	0	0.2973	0	0	0.0744	0	0.1487	0
OG0001294	0	0.1521	0	0.1521	0	0	-0.1521	0.4562	0	0.0761	0.1521	0	-0.1521	0.1521	0	0	0	0	0.0761	0.0761	0	0.2281	0	0.1521	0	0	0.0761	0	0.1521	0
OG0001295	0	0.1495	0	0.299	0	0	-0.1495	0.4485	0	0.0748	0.1495	0	-0.1495	0.1495	0	0	0	0	0.0748	0.0748	0	0.2243	0	0.1495	0	0	0.0748	0	0.1495	0
OG0001296	0	0.1503	0	0.1503	0	0	-0.1503	0.451	0	0.0751	0	0	-0.1503	0.1503	0	0	0	0	0.0751	0.0751	0	0.2255	0	0.3007	0	0	0.0751	0	0.1503	0
OG0001297	0	0.1471	0	0.2941	0	0	-0.147	0.4412	0	0.0735	0.147	0	-0.147	0.1471	0	0	0	0	0.0735	0.0735	0	0.2206	0	0.2941	0	0	0.0735	0	0.147	0
OG0001298	0	0.1471	0	0	0	0	-0.147	0.5882	0	0.0735	0.147	0	-0.147	0.1471	0	0	0	0	0.0735	0.0735	0	0.2206	0	0.1471	0	0	0.0735	0	0.147	0
OG0001299	0	0.1439	0	0.2879	0	0	-0.144	0.5759	0	0.072	0.144	0	-0.144	0.1439	0	0	0	0	0.072	0.072	0	0.2159	0	0.1439	0	0	0.072	0	0.144	0
OG0001300	0	0.1512	0	0.1512	0	0	-0.1512	0.4536	0	0.0756	0.1512	0	-0.1512	0.1512	0	0	0	0.1512	0.0756	0.0756	0	0.2268	0	0.1512	0	0	0.0756	0	0.1512	0
OG0001301	0	0.1455	0	0.291	0	0	-0.1455	0.4365	0	0.0728	0.1455	0	-0.1455	0.1455	0	0	0	0.1455	0.0728	0.0728	0.1455	0.2183	0	0.291	0	0	0.0728	0	0.1455	0
OG0001302	0	0.1495	0	0.1495	0	0	-0.1495	0.4485	0	0.0748	0.1495	0	-0.1495	0.1495	0	0	0	0	0.0748	0.0748	0.1495	0.2243	0	0.299	0	0	0.0748	0	0	0
OG0001303	0	0.1495	0	0.299	0	0	-0.1495	0.4485	0	0.0748	0.1495	0.1495	-0.1495	0.1495	0	0	0	0	0.0748	0.0748	0	0.2243	0	0.1495	0	0	0.0748	0	0	0
OG0001304	0	0.1503	0	0.3007	0	0	-0.1503	0.451	0	0.0751	0.1503	0	-0.1503	0.1503	0	0	0	0	0.0751	0.0751	0	0.2255	0	0.1503	0	0	0.0751	0	0	0
OG0001305	0	0.1495	0	0.299	0	0	-0.1495	0.4485	0	0.0748	0.1495	0	-0.1495	0.1495	0	0	0	0	0.0748	0.0748	0	0.2243	0	0.1495	0	0	0.0748	0.1495	0	0
OG0001306	0	0.1503	0	0.1503	0	0	-0.1503	0.451	0	0.0751	0.1503	0	-0.1503	0.1503	0	0	0	0.1503	0.0751	0.0751	0	0.2255	0	0.1503	0	0	0.2255	0	0	0
OG0001307	0	0.1529	0	0.1529	0	0	-0.1529	0.4588	0	0.0764	0.1529	0	-0.1529	0.1529	0	0	0	0	0.0764	0.0764	0	0.2294	0	0.1529	0	0	0.0764	0	0	0
OG0001308	0	0.1529	0	0.1529	0	0	-0.1529	0.4588	0	0.0764	0.1529	0	-0.1529	0.1529	0	0	0	0	0.0764	0.0764	0	0.2294	0	0.1529	0	0	0.0764	0	0	0
OG0001309	0	0.1503	0	0.3007	0	0	-0.1503	0.451	0	0.0751	0.1503	0	-0.1503	0.1503	0	0	0	0	0.0751	0.0751	0	0.2255	0	0	0	0	0.0751	0	0.1503	0
OG0001310	0	0.1487	0	0.2973	0	0	-0.1487	0.446	0	0.0744	0.1487	0	-0.1487	0.1487	0	0	0	0	0.0744	0.0744	0	0.223	0	0.1487	0	0	0.0744	0	0.1487	0.1487
OG0001311	0	0.1512	0	0.1512	0	0	-0.1512	0.4536	0	0.0756	0.1512	0	0	0.1512	0	0	0	0	0.0756	0.0756	0	0.378	0	0.1512	0	0	0.0756	0	0	0
OG0001312	0	0.1512	0	0.3024	0	0	-0.1512	0.4536	0	0.0756	0.1512	0	0	0.1512	0	0	0	0	0.0756	0.0756	0	0.2268	0	0.1512	0	0	0.0756	0	0.1512	0
OG0001313	0	0.1547	0	0.1547	0	0	-0.1548	0.4643	0	0.0774	0	0	0	0.1547	0	0	0	0	0.0774	0.0774	0	0.2321	0	0.1547	0	0	0.0774	0	0.1548	0
OG0001314	0	0.1512	0	0.1512	0	0	-0.1512	0.4536	0	0.0756	0.1512	0	0	0.1512	0	0	0	0	0.0756	0.0756	0	0.2268	0	0.3024	0	0	0.0756	0	0.1512	0
OG0001315	0	0.1521	0	0.3041	0	0	-0.1521	0.4562	0	0.0761	0	0	0	0.1521	0	0	0	0	0.0761	0.0761	0	0.2281	0	0.1521	0	0	0.0761	0	0.1521	0
OG0001316	0	0.1479	0	0.2957	0	0	-0.1478	0.4436	0	0.0739	0.1478	0	0	0.1479	0	0	0	0	0.0739	0.0739	0	0.3696	0	0.1479	0	0	0.0739	0	0.1478	0
OG0001317	0	0.1539	0	0.1539	0	0	-0.1538	0.4616	0	0.0769	0	0	0	0.1539	0	0	0	0	0.0769	0.2308	0	0.2308	0	0.1539	0	0	0.0769	0	0	0
OG0001318	0	0.1547	0	0.1547	0	0	-0.1548	0.4643	0	0.0774	0	0	0	0.1547	0	0	0	0	0.0774	0.0774	0	0.2321	0	0.1547	0	0	0.0774	0	0.1548	0
OG0001319	0.1521	0.1521	0	0.1521	0	0	-0.1521	0.4562	0	0.0761	0	0	0	0	0	0	0	0	0.0761	0.0761	0	0.2281	0	0.3041	0	0	0.0761	0	0.1521	0
OG0001320	0	0.1521	0	0.1521	0	0	-0.1521	0.4562	0	0.0761	0.1521	0	0	0.1521	0	0	0	0	0.0761	0.0761	0	0.2281	0	0.3041	0	0	0.0761	0	0	0
OG0001321	0	0.1539	0	0.1539	0	0	-0.1538	0.4616	0	0.0769	0.1538	0	0	0.1539	0	0	0	0	0.0769	0.0769	0	0.2308	0	0	0	0	0.0769	-0.1538	0.1538	0
OG0001322	0	0.1487	0	0.1487	0	0	-0.1487	0.446	0	0.0744	0	0	0	0.1487	0	0	0	0	0.0744	0.0744	0	0.3716	0	0.1487	0	0	0.223	-0.1487	0.1487	0
OG0001323	0	0.1529	0	0.1529	0	0	-0.1529	0.4588	0	0.0764	0.1529	0	0	0.1529	0	0	0	0	0.0764	0.0764	0	0.2294	0	0.1529	0	0	0.0764	-0.1529	0.1529	0
OG0001324	0.1487	0.1487	0	0.1487	0	0	-0.1487	0.446	0	0.0744	0.1487	0	0	0.1487	0	0	0	0	0.0744	0.0744	0	0.3716	0	0.1487	0	0	0.0744	-0.1487	0.1487	0
OG0001325	0	0.1507	0	0.1507	0	0	-0.1508	0.4522	0	0.0754	0.1508	0	0	0.1507	0	0	0	0	0.0754	0.0754	0	0.2261	0	0.1507	0	0	0.0754	-0.1508	0.1508	0.0753
OG0001326	0	0.1516	0	0.1516	0	0	-0.1516	0.4549	0	0.0758	0	0	0	0.1516	0	0	0	0	0.0758	0.0758	0	0.2274	0	0.1516	0	0	0.0758	-0.1516	0.1516	0.0758
OG0001327	0	0.1483	0	0.1483	0	0	-0.1482	0.4448	0	0.0741	0.1482	0	0	0.1483	0	0	0	0	0.0741	0.0741	0	0.2224	0	0.2965	0	0	0.0741	-0.1482	0.1482	-0.0742
OG0001328	0	0.1463	0	0.2925	0	0	-0.1463	0.4388	0	0.0732	0	0	0	0.1463	0	0	0	0	0.0732	0.0732	0	0.2194	0	0.1463	0	0	0.0732	-0.1463	0.1463	0.1462
OG0001329	0	0.1463	0	0.2925	0	0	-0.1463	0.4388	0	0.2194	0.1463	0	0	0.1463	0	0	0	0	0.0732	0.0732	0	0.2194	0	0.2925	0	0	0.0732	-0.1463	0.1463	0
OG0001330	0	0.1503	0	0.3007	0	0	-0.1503	0.451	0	0.0751	0.1503	0	0	0.1503	0	0	0	0	0.0751	0.0751	0	0.2255	0	0.1503	0	0	0.0751	-0.1503	0.1503	0
OG0001331	0	0.1503	0	0.3007	0	0	-0.1503	0.451	0	0.0751	0.1503	0	0	0.1503	0	0	0	0	0.0751	0.0751	0	0.2255	0	0.1503	0	0	0.0751	-0.1503	0.1503	0
OG0001332	0	0.1447	0	0.2894	0	0	-0.1447	0.4341	0	0.0723	0.1447	0	0	0.1447	0	0	0	0	0.0723	0.0723	0	0.3618	0	0.2894	0	0	0.0723	-0.1447	0.1447	0
OG0001333	0	0.1455	0	0.291	0	0	-0.1455	0.5819	0	0.0728	0.1455	0	0	0.1455	0	0	0	0	0.0728	0.0728	0	0.2183	0	0.1455	0	0	0.0728	-0.1455	0	0
OG0001334	0	0.1547	0	0.3095	0	0	-0.1548	0.3095	0	0.0774	0.1548	0	0	0.1547	0	0	0	0	0.0774	0.0774	0	0.0773	0	0.3095	0	0	0.0774	-0.1548	0	0
OG0001335	0	0.1557	0	0.3114	0	0	-0.1557	0.3114	0	0.0779	0	0	0	0.1557	0	0	0	0	0.0779	0.0779	0	0.2336	0	0.1557	0	0	0.0779	-0.1557	0.1557	0
OG0001336	0	0.1447	0	0.2894	0	0	-0.1447	0.5789	0	0.0723	0.1447	0	0	0.1447	0	0	0	0	0.0723	0.0723	0	0.217	0	0.1447	0	0	0.0723	-0.1447	0.1447	0
OG0001337	0	0	0	0.3007	0	0	-0.1503	0.451	0	0.0751	0.1503	0	0	0.1503	0	0	0	0	0.0751	0.0751	0	0.2255	0	0.1503	0.1503	0	0.0751	-0.1503	0.1503	0
OG0001338	0	0.1425	0	0.285	0	0	-0.1425	0.57	0	0.0713	0.1425	0	0	0.1425	0	0	0	0	0.0713	0.0713	0	0.2138	0	0.285	0	0	0.0713	-0.1425	0.1425	0
OG0001339	0.1521	0.1521	0	0.1521	0	0	-0.1521	0.4562	0	0.0761	0.1521	0	0	0.1521	0	0	0	0	0.0761	0.0761	0	0.2281	0	0.1521	0	0	0.0761	-0.1521	0.1521	0
OG0001340	0.1529	-0.1529	0	0.3059	0	0	-0.1529	0.153	0	0.0764	0.1529	0	0	0.1529	0	0	0	0	0.0764	0.0764	0	0.3824	0	0.1529	0	0	0.0764	-0.1529	0.1529	0
OG0001341	0.1521	0.1521	0	0.1521	0	0	-0.1521	0.3041	0	0.0761	0	0	0	0.1521	0	0	0	0	0.2281	0.0761	0	0.3801	0	0.1521	0	0	0.0761	-0.1521	0.1521	0
OG0001342	0.1567	0.1567	0	0.1567	0	0	-0.1567	0.3133	0	0.0784	0.1567	0	0	0.1567	0	0	0	0	0.0784	0.0784	0	0.235	0	0.1567	0	0	0.0784	-0.1567	0.1567	0
OG0001343	0	0.1547	0	0.3095	0	0	-0.1548	0.3095	0	0.0774	0.1548	0	0	0.1547	0	0	0	0	0.0774	0.0774	0	0.2321	0	0.1547	0	0	0.0774	-0.1548	0.1548	0
OG0001344	0	0.1529	0	0.1529	0	0	-0.1529	0.4588	0	0.0764	0.1529	0	0	0.1529	0	0	0	0	0.0764	0.0764	0	0.2294	0	0.1529	0	0	0.0764	-0.1529	0.1529	0
OG0001345	0	0.1495	0	0.299	0	0	-0.1495	0.4485	0	0.0748	0.1495	0	0	0.1495	0	0	-0.1495	0	0.0748	0.0748	0	0.2243	0	0.1495	0	0	0.0748	-0.1495	0.1495	0
OG0001346	0	0.1495	0	0.299	0	0	-0.1495	0.4485	0	0.0748	0.1495	0	0	0.1495	0	0	-0.1495	0	0.0748	0.0748	0	0.2243	0	0.1495	0	0	0.0748	-0.1495	0.1495	0
OG0001347	0	0.1487	0	0.2973	0	0	-0.1487	0.446	0	0.0744	0.1487	0	0	0.1487	0	0	-0.1487	0	0.0744	0.0744	0	0.223	0	0.1487	-0.1487	0	0.0744	-0.1487	0.1487	0
OG0001348	0	0.1467	0	0.2933	0	0	-0.1466	0.44	0	0.0733	0.1466	0	0	0.1467	0	0	-0.1466	0	0.0733	0.0733	0	0.22	0	0.1467	-0.1466	0	0.0733	-0.1466	0.1466	-0.0734
OG0001349	0	0.1479	0	0.1479	0	0	-0.1478	0.5175	0	0.0739	0.1478	0	0	0.1479	0	0	-0.1478	0	-0.0739	0.0739	0	0.2218	0	0.2957	-0.1478	0	0.0739	-0.1478	0	-0.074
OG0001350	0	0.1467	0	0.2933	0	0	-0.1466	0.5133	0	0.0733	0.1466	0	0	0.1467	0	0	-0.1466	0	-0.0733	0.0733	0	0.22	0	0.2933	-0.1466	0	0.0733	-0.1466	0.1466	0
OG0001351	0	0.1516	0	0.3032	0	0	-0.1516	0.3791	0	0.0758	0.1516	0	0	0.1516	0	0	-0.1516	0	-0.0758	0.0758	0	0.2274	0	0.3032	-0.1516	0	0.0758	-0.1516	0.1516	0
OG0001352	0	0.1475	0	0.2949	0	0	-0.1474	0.516	0	0.0737	0.1474	0	0	0.1475	0	0	-0.1474	0	-0.2212	0.0737	0	0.2212	0	0.1475	-0.1474	0	0.0737	-0.1474	0.1474	0
OG0001353	0	0.1475	0	0.2949	0	0	-0.1474	0.516	0	0.0737	0.1474	0	0	0.1475	0	0	-0.1474	0	-0.2212	0.0737	0	0.2212	0	0.1475	-0.1474	0	0.0737	-0.1474	0.1474	0
OG0001354	0	0.1463	0	0.2925	0	0	-0.1463	0.5119	0	0.0732	0.1463	0	0	0	0	0	-0.1463	0	0.1463	0.2194	0	0.2194	0	0.2925	-0.1463	0	0.0732	-0.1463	0.1463	0
OG0001355	0	0.1512	0	0.1512	0	0	-0.1512	0.5292	0	0.0756	0.1512	0	0	0	0	0	-0.1512	0	0.1512	0.2268	0	0.2268	0	0.1512	-0.1512	0	0.0756	-0.1512	0.1512	0
OG0001356	0	0.1521	0	0.1521	0	0	-0.1521	0.3802	0	0.0761	0.1521	0	0	0.1521	0	0	-0.1521	0	0.1521	0.2281	0	0.3801	0	0.1521	-0.1521	0	0.0761	-0.1521	0.1521	0
OG0001357	0	0.1539	0	0.1539	0	0	-0.1538	0.3846	0	0.0769	0.1538	0.1538	0	0.3077	0	0	-0.1538	0	0.1538	0.0769	0	0.2308	0	0.1539	-0.1538	0	0.0769	-0.1538	0.1538	0
OG0001358	0	0.1521	0	0.3041	0	0	-0.1521	0.3802	0	0.0761	0.1521	0	0	0	0	0	-0.1521	0	0.1521	0.0761	0	0.3801	0	0.1521	-0.1521	0	0.0761	-0.1521	0.1521	0
OG0001359	0	0.1521	0	0.1521	0	0	-0.1521	0.5322	0	0.0761	0.1521	0	0	-0.1521	0	0	-0.1521	0	0.1521	0.0761	0	0.2281	0	0.1521	-0.1521	0	0.0761	-0.1521	0.1521	0
OG0001360	0	0.1479	0	0.2957	0	0	-0.1478	0.5175	0	0.0739	0.1478	0	0	0	0	0	-0.1478	0	0.1478	0.0739	0	0.2218	0	0.2957	-0.1478	0	0.0739	-0.1478	0.1478	0
OG0001361	0	0.1471	0	0.2941	0	0	-0.147	0.5147	0	0.0735	0.147	0.147	0	0.1471	0	0	-0.147	0	0	0.0735	0	0.2206	0	0.2941	-0.147	0	0.0735	-0.147	0.147	0
OG0001362	0	0.1512	0	0.1512	0	0	-0.1512	0.5292	0	0.2268	0	0	0	0.1512	0	0	-0.1512	0	0.1512	0.0756	0	0.2268	0	0.1512	-0.1512	0	0.0756	-0.1512	0.1512	0
OG0001363	0	0.1455	0	0.291	0	0	-0.1455	0.5092	0	0.2182	0	0.1455	0	0.1455	0	0	-0.1455	0	0	0.0728	0	0.3637	0	0.1455	-0.1455	0	0.0728	-0.1455	0.1455	0
OG0001364	0	0.1596	0	0.1596	0	0	-0.1596	0.3991	0	0.0798	0.1596	0	0	0	0	0	-0.1596	0	0	0.0798	0	0.2394	0	0.1596	-0.1596	0	0.0798	-0.1596	0.1596	0
OG0001365	0	0.1529	0	0.1529	0	0	-0.1529	0.5353	0	0.0764	0.1529	0	0	-0.1529	0	0	-0.1529	0	0	0.0764	0	0.2294	0	0.1529	-0.1529	0	0.0764	-0.1529	0.1529	0
OG0001366	0	0.1503	0	0.3007	0	0	-0.1503	0.5262	0	0.0751	0.1503	0	0	0.1503	0	0	-0.1503	0	0	-0.0751	0	0.2255	0	0.1503	-0.1503	0	0.0751	-0.1503	0.1503	0
OG0001367	0	0.1557	0	0.1557	0	0	-0.1557	0.3893	0	0.0779	0.1557	0	0	0	0	0	-0.1557	0	0	0.0779	0	0.3892	0	0.1557	-0.1557	0	0.0779	-0.1557	0.1557	0
OG0001368	0	0.1586	0	0.1586	0	0	-0.1586	0.3965	0	0.0793	0.1586	0	0	0.1586	0	0	-0.1586	0	0	0.0793	0	0.2379	0	0.1586	-0.1586	0	0.0793	-0.1586	0.1586	0
OG0001369	0	0.1586	0	0.1586	0	0	-0.1586	0.3965	0	0.0793	0.1586	0	0	0	0	0	-0.1586	0	0.1586	0.0793	0	0.2379	0	0.1586	-0.1586	0	0.0793	-0.1586	0.1586	0
OG0001370	0	0.1557	0	0.1557	0	0	-0.1557	0.3893	0	0.0779	0.1557	0	0	0.1557	0	0	-0.1557	0	0	0.0779	0	0.2336	0	0.3114	-0.1557	0	0.0779	-0.1557	0.1557	0
OG0001371	0	0.2864	0	0.2864	0	-0.1432	-0.1432	0.5013	0	0.2148	0.1432	0	0	0.1432	0	0	-0.1432	0	0	0.0716	0	0.2148	0	0.2864	-0.1432	0	-0.0716	-0.1432	0.1432	0
OG0001372	0	0.1451	0	0.2902	0	-0.1451	-0.1451	0.5078	0	0.0726	0	0	0	0	0	-0.1451	-0.1451	0	0.1451	0.0726	0	0.2177	0	0.2902	-0.1451	0	0.0726	-0.1451	0.1451	-0.0725
OG0001373	0	0.1552	0	0	0	-0.1552	-0.1552	0.3881	0	0.0776	0.1552	0	0	0.1552	0	-0.1552	-0.1552	0	0	0.0776	0	0.2329	0	0.1552	-0.1552	0	0.0776	-0.1552	0.1552	-0.0776
OG0001374	0	0.1567	0	0.1567	0	-0.1567	-0.1567	0.3917	0	0.0784	0.1567	0	0	0.1567	0	-0.1567	-0.1567	0	0	0.0784	0	0.235	0	0.1567	-0.1567	0	0.0784	-0.1567	0.1567	0
OG0001375	0	0.1512	0	0.3024	0	-0.1512	-0.1512	0.378	0	0.0756	0.1512	0	0	0.1512	0	-0.1512	-0.1512	0	0	0.0756	0	0.2268	0	0.3024	-0.1512	0	0.0756	-0.1512	0.1512	0
OG0001376	0	0.1529	0	0.3059	0	-0.1529	-0.1529	0.3823	0	0.0764	0.1529	0	0	0.1529	0	-0.1529	-0.1529	0	0.1529	0.0764	0	0.2294	0	0.1529	-0.1529	0	0.0764	-0.1529	0.1529	0
OG0001377	0	0.1487	0	0.2973	0	-0.1487	-0.1487	0.5203	0	0.0744	0.1487	0	0	0.1487	0	-0.1487	-0.1487	0	0	0.0744	0	0.223	0	0.1487	-0.1487	0	0.0744	-0.1487	0.1487	0
OG0001378	0	0.1503	0	0.3007	0	-0.1503	-0.1503	0.5262	0	0.0751	0.1503	0	0	0	0	-0.1503	-0.1503	0	0.1503	0.0751	0	0.2255	0	0.1503	0	0	0.0751	-0.1503	0.1503	0
OG0001379	0	0.1547	0	0.3095	0	-0.1548	-0.1548	0.3869	0	0.0774	0.1548	0	0	0.1547	0	-0.1548	-0.1548	0	0.1548	0.0774	0	0.2321	0	0.1547	0	0	0.0774	-0.1548	0.1548	0
OG0001380	0	0.1463	0	0.2925	0	-0.1463	-0.1463	0.5119	0	0.0732	0.1463	0	0	0.1463	0	-0.1463	-0.1463	0	0.1463	0.0732	0	0.3656	0	0.1463	0	0	0.0732	-0.1463	0.1463	0
OG0001381	0	0.1503	0	0.3007	0	-0.1503	-0.1503	0.5262	0	0.0751	0.1503	0	0	0	0	-0.1503	-0.1503	0	0.1503	0.0751	0	0.2255	0	0.1503	0	0	0.0751	-0.1503	0.1503	0
OG0001382	0	0.1596	0	0.1596	0	-0.1596	-0.1596	0.3991	0	0.0798	0.1596	0	0	0	0	-0.1596	-0.1596	0	0	0.0798	0	0.2394	0	0.1596	0	0	0.0798	-0.1596	0.1596	0
OG0001383	0	0.1447	0	0.2894	0	-0.1447	-0.1447	0.5065	0	0.0723	0.1447	0	0	0	0	-0.1447	-0.1447	0	0.1447	0.0723	0	0.3618	0	0.2894	0	0	0.0723	-0.1447	0.1447	0
OG0001384	0	0.1495	0	0.1495	0	-0.1495	-0.1495	0.5232	0	0.0748	0.1495	0	0	0.1495	0	-0.1495	-0.1495	0	0.1495	0.0748	0	0.2243	0	0.299	0	0	0.0748	-0.1495	0.1495	0
OG0001385	0	0.1539	0	0.3077	0	-0.1538	-0.1538	0.3846	0	0.0769	0.1538	0	0	0	0	-0.1538	-0.1538	0	0.1538	0.0769	0	0.2308	0	0.3077	0	0	0.0769	-0.1538	0	0
OG0001386	0	0.1471	0	0.2941	0.147	-0.147	-0.147	0.5147	0	0.2206	0.147	0	0	-0.1471	0	-0.147	-0.147	0	0.147	0.0735	0	0.2206	0	0.1471	0	0	0.0735	-0.147	0.147	0
OG0001387	0	0.1529	0	0.3059	0	-0.1529	-0.1529	0.3823	0	0.2294	0.1529	0	0	-0.1529	0	-0.1529	-0.1529	0	0.1529	0.0764	0	0.2294	0	0.1529	0	0	-0.0764	-0.1529	0.1529	0
OG0001388	0	0.1421	0	0.2843	0	-0.1421	-0.1421	0.4975	0	0.2132	0.1421	0	0	0	0	-0.1421	-0.1421	0	0.1421	0.071	0	0.3553	0	0.1421	0	0	0.2132	-0.1421	0.1421	0.0711
OG0001389	0	0.1521	0	0.3041	0	-0.1521	-0.1521	0.3802	0	0.0761	0.1521	0	0	-0.1521	0	-0.1521	-0.1521	0	0.1521	0.0761	0	0.3801	0	0.1521	0	0	0.0761	-0.1521	0	0
OG0001390	0	0.1627	0	0.3255	0	-0.1628	-0.1628	0.0814	0	0.0814	0.1628	0	0	0	0	-0.1628	-0.1628	0	0	-0.0814	0	0.2441	0	0.1627	0	0	0.0814	-0.1628	0.1628	0
OG0001391	0	0.1521	0	0.3041	0	-0.1521	-0.1521	0.3802	0	0.0761	0.1521	0	0	0.1521	0	-0.1521	-0.1521	0	0	0.0761	0	0.3801	0	0.1521	0	0	0.0761	-0.1521	0.1521	0
OG0001392	0	0.1487	0	0.2973	0	-0.1487	-0.1487	0.5203	0	0.0744	0	0	0	0.1487	0	-0.1487	-0.1487	0	0	0.0744	0	0.223	0	0.2973	0	0	0.0744	-0.1487	0.1487	0
OG0001393	0	0	0	0.3059	0	-0.1529	-0.1529	0.5353	0	0.0764	0	0	0	0	0	-0.1529	-0.1529	0	0	0.0764	0	0.2294	0	0.1529	0	0	0.0764	-0.1529	0.1529	0
OG0001394	0	0.1617	0	0.1617	0	-0.1617	-0.1617	0.4043	0	0.0809	0.1617	0	0	0	0	-0.1617	0	0	0	0.0809	0	0.2426	0	0.1617	0	0	0.0809	-0.1617	0.1617	0
OG0001395	0	0.1607	0	0.1607	0	-0.1606	-0.1606	0.4016	0	0.0803	0.1606	0	0	-0.1607	0	-0.1606	0	0	0	0.0803	0	0.241	0	0.1607	0	0	0.0803	-0.1606	0.1606	0
OG0001396	0	-0.1539	0	0.3077	0	-0.1538	-0.1538	0.3846	0	0.0769	0.1538	0	0	-0.1539	0	-0.1538	0	0	0	-0.0769	0	0.3846	0	0.1539	0	0	0.0769	-0.1538	0.1538	0
OG0001397	0	0.1487	0	0.2973	0	-0.1487	-0.1487	0.5203	0	0.0744	0.1487	0	0	-0.1487	0	-0.1487	0	0	0	0.0744	0	0.3716	0	0.1487	0	0	-0.0744	-0.1487	0.1487	0
OG0001398	0	0.1586	0	0.1586	0	-0.1586	-0.1586	0.3965	0	0.0793	0.1586	0	0	0.1586	0	0	0	0	0.1586	0.0793	0	0.2379	0	0.3172	0	0	-0.0793	-0.1586	0.1586	0
OG0001399	0	0.1607	0	0.3213	0	-0.1606	-0.1606	0.4016	0	0.0803	0.1606	0	0	-0.1607	0	0	0	0	0	0.0803	0	0.241	0	0.1607	0	0	-0.0803	-0.1606	0	0
OG0001400	0	0.1586	0	0.1586	0	-0.1586	-0.1586	0.3965	0	0.0793	0.1586	0	0	-0.3172	0	0	0	0	0.1586	0.0793	0	0.2379	0	0.1586	0	0	-0.0793	-0.1586	0.1586	0
OG0001401	0	0.1576	0	0.3152	0	-0.1576	-0.1576	0.3941	0	0.0788	0.1576	0	0	-0.3152	0	0	0	0	0	0.0788	0	0.2364	0	0.1576	0	0	-0.0788	-0.1576	0	0
OG0001402	0	0	0	0.3077	0	-0.1538	-0.1538	0.3846	0	0.0769	0.1538	0	0	-0.3077	0	0	0	0	0	0.0769	0	0.3846	0	-0.1539	0	0	0.0769	-0.1538	0.1538	0
OG0001403	0	0.1503	0	0.3007	0	-0.1503	-0.1503	0.5262	0	0.0751	0.1503	0	0	-0.3007	0	0	0	0	0.1503	0.0751	0	0.2255	0	0.1503	0	0	0.0751	-0.1503	0.1503	0
OG0001404	0	0.1503	0	0.3007	0	-0.1503	-0.1503	0.5262	0	0.0751	0.1503	0	0	-0.3007	0	0	0	0	0.1503	-0.0751	0	0.2255	0	0.1503	0	0	0.0751	-0.1503	0.1503	0
OG0001405	0	0.1557	0	0.3114	0	-0.1557	-0.1557	0.3893	0	0.0779	0.1557	0	0	-0.3114	0	0	0	0	0.1557	0.0779	0	0.2336	0	0.1557	0	0	0.0779	-0.1557	0.1557	0
OG0001406	0	0.1552	0	0.3105	0	-0.1552	-0.1552	0.5433	0	0.0776	0.1552	0	0	0.0776	0	0	0	0	0.1552	0.0776	0	0.2329	0	0.1552	0	0	0.0776	-0.1552	0.1552	0
OG0001407	0	0.1552	0	0.3105	0	-0.1552	-0.1552	0.5433	0	0.0776	0.1552	0	0	0.0776	0	0	0	0	0.1552	0.0776	0	0.2329	0	0.1552	0	0	0.0776	-0.1552	0.1552	0
OG0001408	0	0.1534	0	0.3068	0	-0.1534	-0.1534	0.5369	0	0.0767	0.1534	0	0	0.2301	0	0	0	0	0.1534	0.0767	0	0.2301	0	0.1534	0	0	0.0767	-0.1534	0.1534	0
OG0001409	0	0.1611	0	0.3223	0	-0.1612	-0.1612	0.4029	0	0.0806	0	0	0	0.0806	0.1612	0	0	0	0.1612	0.0806	0	0.2417	0	0.1611	0	0	0.0806	-0.1612	0.1612	0
OG0001410	0	0.1644	0	0.1644	0	-0.1644	-0.1644	0.411	0	0.0822	0.1644	0	0	0.2466	0	0	0	0	0	0.0822	0	0.2466	0	0.1644	0	0	0.0822	-0.1644	0	0
OG0001411	0	0.1622	0	0.1622	0	-0.1622	-0.1622	0.4056	0	0.0811	0.1622	0	0	0.0811	0	0	0	0	0.1622	0.0811	0	0.2433	0	0.3244	0	0	0.0811	-0.1622	0	0
OG0001412	0	0.1552	0	0.1552	0	-0.1552	-0.1552	0.5433	0	0.0776	0.1552	0	0	0.2328	0	0	0	0	0	0.0776	0	0.2329	0	-0.3105	0	0	0.0776	-0.1552	0	0
OG0001413	0	0.1639	0	0.1639	0	-0.1638	-0.1638	0.4096	0	0.0819	0.1638	0	0	0.2458	0	0	0	0	0.1638	0.0819	0	0.2458	0	0.2458	0	0	0.0819	-0.1638	0	0
OG0001414	0	0.1684	0	0.1684	0	-0.1684	-0.1684	0.4211	0	0.0842	0.1684	0	0	0.0842	0	0	0	0	0.1684	0.0842	0	0.2527	0	0.0842	0	0	0.0842	-0.1684	0	0
OG0001415	0	0.1639	0	0.3277	0	-0.1638	-0.1638	0.4096	0	-0.0819	0.1638	0	0	0.0819	0	0	0	0	0.1638	0.0819	0	0.2458	0	0.0819	0	0	0.0819	-0.1638	0.1638	0
OG0001416	0	0.1649	0	0.1649	0	-0.165	-0.165	0.4124	0	0.2474	0.165	0	0	0.0825	0	0	0	0	0.165	0.0825	0	0.2474	0	0.0825	0	0	0.0825	-0.165	0.165	0
OG0001417	0	0.1576	0	0.3152	0	-0.1576	-0.1576	0.5517	0	0.0788	0.1576	0	0	0.0788	0	0	0	0	0.1576	0.0788	0	0.2364	0	0.0788	0	0	0.0788	-0.1576	0.1576	0
OG0001418	0	0.1557	0	0.3114	0	-0.1557	-0.1557	0.5449	0	0.2335	0.1557	0	0	0.0779	0	0	0	0	0.1557	0.0779	0	0.2336	0	0.0779	0	0	0.0779	-0.1557	0.1557	0
OG0001419	0	0.1639	0	0.3277	0	-0.1638	-0.1638	0.4096	0	0.0819	0.1638	0	0	0.0819	0	0	0	0	0.1638	0.0819	0	0.2458	0	0.0819	0	0	-0.0819	-0.1638	0.1638	0
OG0001420	0	0.1673	0	0.1673	0	-0.1672	-0.1672	0.4181	0	-0.0836	0.1672	0	0	0.0836	0	0	0	0	0.1672	0.0836	0	0.2509	0	0.0836	0	0	0.0836	-0.1672	0.1672	0
OG0001421	0	0.1617	0	0.3234	0	-0.1617	-0.1617	0.4043	0	0.0809	0	0	0	0.0809	0	0	0	0	0	0.0809	0	0.4042	0	0.0809	0	0	-0.0809	-0.1617	0.1617	0
OG0001422	0	0.1697	0	0	0	-0.1696	-0.1696	0.4241	0	0.0848	0.1696	0	0	0.0848	0	0	0	0	0	0.0848	0	0.2545	0	0.0848	0	0	0.0848	-0.1696	0.1696	0
OG0001423	0	0.1617	0	0.1617	0	-0.1617	-0.1617	0.5659	0	0.0809	0.1617	0	0	0.0809	0	0	0	0	0	0.0809	0	0.2426	0	-0.0809	0	0	0.0809	-0.1617	0.1617	0
OG0001424	0	0.1607	0	0.1607	0	-0.1606	-0.1606	0.5623	0	0.0803	0.1606	0	0	0.0803	0	0	0	0	0.1606	0.0803	0	0.241	0	0.0803	0	0	0.0803	-0.1606	0.1606	0
OG0001425	0	0.1649	0	0.3299	0	-0.165	-0.165	0.4124	0	0.0825	0.165	0	0	0.0825	0	0	0	0	0.165	0.0825	0	0.2474	0	0.0825	0	0	0.0825	-0.165	0	0
OG0001426	0	0.1697	0	0.1697	0	-0.1696	-0.1696	0.4241	0	0.0848	0.1696	0	0	0.0848	0	0	0	0	0	0.0848	0	0.2545	0	0.0848	0	0	0.0848	-0.1696	0	0
OG0001427	0	0.1661	0	0.3322	0	-0.1661	-0.1661	0.4153	0	0.0831	0	0	0	0.0831	0	0	0	0	0	0.0831	0	0.2492	0	0.0831	0	0	0.0831	-0.1661	0.1661	0
OG0001428	0	0.1607	0	-0.1607	0	-0.1606	-0.1606	0.5623	0	0.0803	0	0	0	0.0803	0	0	0	0	0	0.0803	0	0.241	0	0.241	0	0	0.0803	-0.1606	0.1606	0
OG0001429	0	0.1627	0	0.3255	0	-0.1628	-0.1628	0.4069	0	0.0814	0.1628	0	0	0.0814	0	0	0	0	0	0.0814	0	0.2441	0	0.2441	0	0	0.0814	-0.1628	0.1628	0
OG0001430	0	0.1586	0	0.1586	0	-0.1586	-0.1586	0.5551	0	0.0793	0.1586	0	0	0.0793	0	0	0	0	0.1586	0.0793	0	0.2379	0	0.2379	0	0	0.0793	-0.1586	0.1586	0
OG0001431	0	0.1649	0	0.1649	0	-0.165	-0.165	0.4124	0	0.0825	0.165	0	0	0.0825	0	0	0	0	0.165	0.0825	0	0.2474	0	0.2474	0	0	0.0825	-0.165	0.165	0
OG0001432	0	0.1673	0	0.1673	0	-0.1672	-0.1672	0.4181	0	0.0836	0.1672	0	0	0.0836	0	0	0	0	0.1672	0.0836	0	0.2509	0	0.0836	0	0	0.0836	-0.1672	0.1672	0
OG0001433	0	0.1661	0	0.1661	0	-0.1661	-0.1661	0.4153	0	0.0831	0	0	0	0.0831	0	0	0	0	0.1661	0.0831	0	0.2492	0	0.2491	0	0	0.0831	-0.1661	0.1661	0
OG0001434	0	0.1684	0	0.1684	0	-0.1684	-0.1684	0.4211	0	0.0842	0.1684	0	0	0.0842	0	0	0	0	0	0.0842	0	0.2527	0	0.0842	0	0	0.0842	-0.1684	0.1684	0
OG0001435	0	0.1684	0	0.1684	0	-0.1684	-0.1684	0.4211	0	0.0842	0	0	0	0.0842	0.1684	0	0	0	0	0.0842	0	0.2527	0	0.0842	0	0	0.0842	-0.1684	0.1684	0
OG0001436	0	0.1709	0	0.1709	0	-0.1709	-0.1709	0.2563	0	0.0855	0.1709	0	0	0.0855	0	0	0	0	0	0.0855	0	0.2563	0	0.2563	0	0	0.0855	-0.1709	0.1709	0
OG0001437	0	0.1782	0	0.1782	0	-0.1782	-0.1782	0.2672	0	0.0891	0	0	0	0.0891	0	0	0	0	0	0.0891	0	0.1782	0	0.2673	0	0	0.0891	-0.1782	0	0
OG0001438	0	0.1715	0	0.1715	0	-0.1715	-0.1715	0.2572	0	0.0858	0.1715	0	0	0.0858	0	0	0	0	0	0.0858	0	0.343	0	0.2572	0	0	0.0858	-0.1715	0.1715	0
OG0001439	0	0.1715	0	0.343	0	-0.1715	-0.1715	0.0858	0	0.0858	0.1715	0	0	0.0858	0	0	0	0	0	0.0858	0	0.1715	0	0.2572	0	0	0.2572	-0.1715	0.1715	0
OG0001440	0	0.1703	0	0.3405	0	-0.1703	-0.1703	0.2553	0	0.0852	0	0	0	0.2554	0	0	0	0	0	0.0852	0	0.3405	0	0.0852	0	0	0.0852	-0.1703	0	0
OG0001441	0	0.169	0	0.169	0	-0.169	-0.169	0.4226	0	0.0845	0.169	0	0	0.0845	0	0	0	0	0.169	0.0845	0	0.169	0	0.2535	0	0	0.0845	-0.169	0.169	0
OG0001442	0	0.169	0	0.169	0	-0.169	-0.169	0.4226	0	0.0845	0	0	0	0.0845	0	0	0	0	0.169	0.0845	0	0.3381	0	0.0845	0	0	0.0845	-0.169	0.169	0
OG0001443	0	0.1715	0	0.343	0	0	-0.1715	0.4288	0	0.0858	0.1715	0	0	0.0858	0	0	0	0	0.1715	0.0858	0	0.1715	0	0.0858	0	0	0.0858	-0.1715	0	0
OG0001444	0	0.1715	0	0.343	0	0	-0.1715	0.4288	0	0.0858	0.1715	0	0	0.0858	0	0	0	0	0.1715	0.0858	0	0.1715	0	0.0858	0	0	0.0858	-0.1715	0	0
OG0001445	0	0.1768	0	0.1768	0	0	-0.1768	0.2651	0	0.0884	0.1768	0	0	0.0884	0	0	0	0	0.1768	0.0884	0	0.1768	0	0.2652	0	0	0.0884	-0.1768	0.1768	0
OG0001446	0	0.1728	0	0.3455	0	0	-0.1728	-0.0863	0	0.0864	0	0	0	0.0864	0	0	0	0	0.1728	0.0864	0	0.3455	0	0.2592	0	0	0.0864	-0.1728	0.1728	0
OG0001447	0	0.1754	0	0.1754	0	0	-0.1754	0.4385	0	0.0877	0.1754	0	0	0.0877	0	0	0	0	0	-0.0877	0	0.1754	0	0.0877	0	0	0.0877	-0.1754	0.1754	0
OG0001448	0	0.1754	0	0.1754	0	0	-0.1754	0.4385	0	0.0877	0	0	0	0.0877	0	0	0	0	0.1754	0.0877	0	0.1754	0	0.0877	0	0	0.0877	-0.1754	0.1754	0
OG0001449	0	0.1703	0	0.1703	0	0	-0.1703	0.4257	0	0.0852	0	0	0	0.2554	0	0	0	0	0.1703	0.0852	0	0.1703	0	0.0852	0	0	0.2554	-0.1703	0.1703	0
OG0001450	0	0.1734	0	0.3468	0	0	-0.1734	0.5203	0	0.0867	0.1734	0	0	0.0867	0	0	0	0	0	0.0867	0	0.1734	0	0.0867	0	0	0.0867	-0.1734	0	0
OG0001451	0.1747	0.1747	0	0	0	0	-0.1747	0.5242	0	0.0873	0.1747	0	0	0.0873	0	0	0	0	0.1747	0.0873	0	0.1747	0	0.0873	0	0	0.0873	-0.1747	0.1747	0
OG0001452	0	0.1684	0	0.3369	0	0	-0.1684	0.5053	0	0.0842	0.1684	0	0	0.0842	0	0	0	0	0.1684	0.0842	0	0.3369	0	0.0842	0	0	0.0842	-0.1684	0	0
OG0001453	0	0.1709	0	-0.3417	0	0	-0.1709	0.5126	0	0.0855	0.1709	0	0	0.0855	0	0	0	0	0.1709	0.0855	0	0.1709	0	0.0855	0	0	0.0855	-0.1709	0.1709	0
OG0001454	0	0.1721	0	-0.3443	0	0	-0.1721	0.5164	0	0.086	0	0	0	0.086	0	0	0	0	0.1721	0.086	0	0.1721	0	0.086	0	0	0.086	-0.1721	0.1721	0
OG0001455	0	0.1747	0	-0.3495	0	0	-0.1747	0.3495	0	0.0873	0.1747	0	0	0.0873	0	0	0	0	0.1747	0.2621	0	0.1747	0	0.0873	0	0	0.0873	-0.1747	0.1747	0
OG0001456	0	0.1684	0	-0.3369	0	0	-0.1684	0.5053	0	0.0842	0.1684	0	0	0.0842	0	0	0	0	0.1684	0.2526	0	0.1684	0	0.0842	0	0	0.0842	-0.1684	0.1684	0
OG0001457	0	0.169	0	0.2535	0	0	-0.169	0.5071	0	0.0845	0.169	0	0	0.0845	0	0	0	0	0.169	0.2535	0	0.3381	0	0.0845	0	0	0.0845	-0.169	0.169	0
OG0001458	0	0.1796	0	0.2694	0	0	-0.1796	0.3592	0	0.0898	0.1796	0	0	0.0898	0	0	0	0	0.1796	0.2694	0	0.1796	0	0.0898	0	0	0.0898	-0.1796	0.1796	0
OG0001459	0	0.1741	0	0.0871	0	0	-0.1741	0.5222	0	0.0871	0.1741	0	0	0.0871	0	0	0	0	0.1741	0.0871	0	0.3482	0	0.0871	0	0	0.0871	-0.1741	0.1741	0
OG0001460	0	0.169	0	0.2535	0	0	-0.169	0.5071	0	0.0845	0.169	0	0	0.0845	0	0	0	0	0.169	0.2535	0	0.3381	0	0.0845	0	0	-0.0845	-0.169	0.169	0
OG0001461	0	0.1728	0	0.2592	0	0	-0.1728	0.5183	0	0.0864	0.1728	0	0	0.0864	0	0	0	0	0.1728	0.2592	0	0.1728	0	0.0864	0	0	-0.0864	-0.1728	0.1728	0
OG0001462	0	0.1703	0	0.2554	0	0	-0.1703	0.5108	0	0.0852	0	0	0	0.0852	0	0	0	0	0.1703	0.2554	0	0.3405	0	0.0852	0	0	0.0852	-0.1703	0.1703	0
OG0001463	0	0.1703	0	0.2554	0	0	-0.1703	0.5108	0	0.0852	0.1703	0	0	0.0852	0	0	0	0	0	0.2554	0	0.3405	0	0.0852	0	0	0.0852	-0.1703	0.1703	0
OG0001464	0	0.1715	0	0.2572	0	0	-0.1715	0.5145	0	0.0858	0	0	0	0.0858	0	0	0	0	0.1715	0.2572	0	0.1715	0	0.2572	0	0	0.0858	-0.1715	0.1715	0
OG0001465	0	0.1703	0	0.2554	0	0	-0.1703	0.5108	0	0.0852	0.1703	0	0	0.0852	0	0	0	0	0	-0.0852	0	0.3405	0	0.2554	0	0	0.0852	-0.1703	0.1703	0
OG0001466	0	0.1703	0	0.2554	0	0	-0.1703	0.5108	0	0.0852	0.1703	0	0	0.0852	0	0	0	0	0	-0.0852	0	0.3405	0	0.2554	0	0	0.0852	-0.1703	0.1703	0
OG0001467	0	0.1768	0	0.0884	0	0	-0.1768	0.5303	0	0.0884	0.1768	0	0	0.0884	0	0	0	0	0	0.2652	0	0.1768	0	0.0884	0	0	0.0884	-0.1768	0.1768	0
OG0001468	0	0.1703	0	0.2554	0	0	-0.1703	0.5108	0	0.0852	0.1703	0	0	0.0852	0	0	0	0	0	0.2554	0	0.3405	0	0.0852	0	0	0.0852	-0.1703	0.1703	0
OG0001469	0	0.1796	0	0.2694	0	0	0	0.5388	0	0.0898	0.1796	0	0	0.0898	0	0	0	0	0	0.0898	0	0.1796	0	0.0898	0	0	0.0898	-0.1796	0.1796	0
OG0001470	0	0.1811	0	0.0906	0	0	0	0.5432	0	0.0906	0.1811	0	0	0.2716	0	0	0	0	0	0.0906	0	0	0	0.0906	0	0	0.0906	-0.1811	0.1811	0
OG0001471	0	0.1826	0	0.0913	0	0	0	0.5477	0	0.0913	0.1826	0	0	0.0913	0	0	0	0	0	0.0913	0	0.1826	0	0.0913	0	0	0.0913	-0.1826	0.1826	0
OG0001472	0	0.1754	0	0.2631	0	0	0	0.5262	0	0.0877	0.1754	0	0	0.0877	0	0	0	0	0	0.0877	0	0.3508	0	-0.0877	0	0	0.0877	-0.1754	0.1754	0
OG0001473	0	0.1811	0	0.2716	0	0	0	0.3622	0	0.0906	0	0	0	0.0906	0	0	0	0	0.1811	0.0906	0	0.3621	0	-0.0906	0	0	0.2716	-0.1811	0	0
OG0001474	0	0.1811	0	0.2716	0	0	0	0.3622	0	0.0906	0.1811	0	0	0.0906	0	0	0	0	0.1811	0.2716	0	0.1811	0	0.2716	0	0	0.0906	-0.1811	0	0
OG0001475	0	0.1761	0	0.2641	0	0	0	0.5283	0	0.0881	0.1761	0	0	0.0881	0.1761	0	0	0	0.1761	0.1761	0	0.1761	0	0.2641	0	0	0.0881	-0.1761	0	0
OG0001476	0	0.1734	0	0.2601	0	0	0	0.5203	0	0.0867	0.1734	0	0	0.0867	0	0	0	0	0.1734	0.1734	0	0.3468	0	0.2601	0	0	0.0867	-0.1734	0	0
OG0001477	0	0.3522	0	0.2641	0	0	0	0.5283	0	0.0881	0.1761	0	0	0.0881	0	0	0	0	0.1761	0.1761	0	0.1761	0	0.0881	0	0	0.0881	-0.1761	0	0
OG0001478	0	0.1761	0	0.2641	0	0	0	0.5283	0	0.0881	0.1761	0	0	0.0881	0	0	0	0	0.1761	0.1761	0	0.3522	0	0.2641	0	0	0.0881	0	0	0
OG0001479	0	0.1761	0	0.2641	0	0	0	0.5283	0	0.0881	0.1761	0	0	0.0881	0	0	0	0	0.1761	0.1761	0	0.3522	0	0.2641	0	0	0.0881	0	0	0
OG0001480	0	0.1789	0	0.2683	0	0	0	0.5367	0	0.0895	0.1789	0	0	0.0895	0	0	0	0	0.1789	0.1789	0	0.1789	0	0.2683	0	0	0.0895	0	0.1789	0
OG0001481	0	0.1789	0	0.2683	0	0	0	0.5367	0	0.0895	0.1789	0	0	0.0895	0	0	0	0	0	0	0	0.3578	0	0.2683	0	0	0.0895	0	0	0
OG0001482	0	0.1833	0	0.275	0	0	0	0.55	0	0.0916	0.1833	0	0	0.0916	0	0	0	0	0	0.1833	0	0.1833	0	0.0916	0	0	0.0916	0	0.1833	0
OG0001483	0	0.1849	0	0.2774	0	0	0	0.3698	0	0.0924	0.1849	0	0	0.0924	0	0	0	0	0.1849	0.1849	0	0.3698	0	0.0924	0	0	0.0924	0	0.1849	0
OG0001484	0	0.1833	0	0.275	0	0	0	0.3666	0	0.0916	0.1833	0	0	0.0916	0	0	0	0	0	0.1833	0.1833	0.3667	0	0.275	0	0	0.0916	0	0	0
OG0001485	0	0.1782	0	0.2673	0	0	0	0.5345	0	0.0891	0	0	0	0.0891	0	0	0	0	0	0.1782	0	0.1782	0	0.0891	0	0	0.2673	0	0.1782	-0.0891
OG0001486	0	0.1715	0	0.2572	0	0	0	0.5145	0	0.0858	0.1715	0	0	0.0858	0	0	0	0	0	0.1715	0	0.343	0	0.2572	0	0	0.2572	0	0	0.0857
OG0001487	0	0.1833	0	0.275	0	0	0	0.3666	0	0.0916	0	0	0	0.0916	0	0	0	0	0	0.1833	0	0.3667	0	0.275	0	0	0.275	0	0	0
OG0001488	0	0.1761	0	0.2641	0	0	0	0.5283	0	0.0881	0.1761	0	0	0.2641	0	0	0	0	0.1761	0.1761	0	0.3522	0	0.0881	0	0	0.0881	0	0	0
OG0001489	0	0.1833	0	0.0916	0	0	0	0.55	0	0.0916	0	0	0	0.0916	0	0	0	-0.1833	0	0.1833	0	0.3667	0	0.0916	0	0	0.0916	0	0	0
OG0001490	0	0.1789	0	0.2683	0	0	0	0.5367	0	0.0895	0.1789	0	0	0.0895	0	0	0	-0.1789	0.1789	0.1789	0	0.1789	0	0.2683	0	0	0.0895	0	0	0
OG0001491	0	0.1775	0	0.2662	0	0	0	0.5324	0	0.0888	0.1775	0	0	0.0888	0	0	0	-0.1775	0.1775	0.1775	0	0.1775	0	0.2662	0	0	0.0888	0	0.1775	0
OG0001492	0	0.1803	0	0.0901	0	0	0	0.541	0	0.0901	0.1803	0	0	0.0901	0	0	0	-0.1803	0.1803	0.1803	0	0.1803	0	0.2705	0	0	0.0901	0	0.1803	0
OG0001493	0	0	0	0.0909	0	0	0	0.5455	0	0.0909	0.1818	0	0	0.0909	0	0	0	-0.1818	0.1818	0.1818	0.1818	0.1818	0	0.2727	0	0	0.0909	0	0	0
OG0001494	0	0.1898	0	0.2847	0	0	0	0.3797	0	0.0949	0.1898	0	0	0.0949	0	0	0	-0.1898	0.1898	0.1898	0	0.1898	0	0.0949	0	0	0.0949	0	0	0
OG0001495	0	0.1775	0	0.2662	0	0	0	0.5324	0	0.0888	0.1775	0	0	0.0888	0	0	0	-0.1775	0.1775	0.1775	0	0.1775	0	0.2662	0	0	0.0888	0	0.1775	0
OG0001496	0	0.1811	0	0.2716	0	0	0	0.3622	0	0.0906	0.1811	0	0	0.0906	0	0	0	-0.1811	0.1811	0.1811	0	0.3621	0	0.0906	0	0	0.0906	0	0	-0.0905
OG0001497	0.1734	0.1734	0	0.2601	0	0	0	0.5203	0	0.0867	0.1734	0	0	0.0867	0	0	0	-0.1734	0.1734	0.1734	0	0.3468	0	0.2601	0	0	0.0867	0	0	0
OG0001498	0	0.1761	0	0.2641	0	0	0	0.5283	0	0.0881	0	0	0	0.0881	0	0	0	-0.1761	0.1761	0.1761	0	0.3522	0	0.2641	0	0	0.0881	0	0	0
OG0001499	0	0.1747	0	0.2621	0	0	0	0.5242	0	0.0873	0.1747	0	0	0.2621	0	0	0	-0.1747	0.1747	0.1747	0	0.3495	0	-0.0873	0	0	0.0873	0	0	0
OG0001500	0	0.1734	0	0.2601	0	0	0	0.5203	0	0.0867	0	0	0	0.2601	0	0	0	-0.1734	0.1734	0.1734	0	0.3468	0	0.2601	0	0	0.0867	0	0	0
OG0001501	0	0.1849	0	0.2774	0	0	0	0.3698	0	0.0924	0.1849	0	0	0.0924	0	0	0	-0.1849	0.1849	0.1849	0	0.1849	0	0.2774	0	0	0.0924	0	0.1849	0
OG0001502	0	0.1865	0	0.2798	0	0	0	0.373	0	0.0932	0.1865	0	0	0.0932	0	0	0	-0.1865	0	0.1865	0	0.1865	0	0.2798	0	0	0.0932	0	0.1865	0
OG0001503	0	0.1818	0	0.2727	0	0	0	0.5455	0	0.0909	0.1818	0	0	0.0909	0	0	0	-0.1818	0	0.1818	0	0.1818	0	0.0909	0	0	0.0909	0	0.1818	0
OG0001504	0	0.1915	0	0.2873	0	0	0	0.3831	0	0.0958	0.1916	0	0	0.0958	0	0	0	-0.1916	0	0.1916	0	0.1915	0	0.0958	0	0	0.0958	0	0	0
OG0001505	0	0.1833	0	0.0916	0	0	0	0.55	0	0.0916	0.1833	0	0	0.0916	0	0	0	-0.1833	0.1833	0.1833	0	0.1833	0	0.0916	0	0	0.0916	0	0.1833	0
OG0001506	0	0.1818	0	0.2727	0	0	0	0.5455	0	0.0909	0.1818	0	0	0.0909	0	0	0	-0.1818	0.1818	0.1818	0	0.1818	0	0.0909	0	0	0.0909	0	0	0
OG0001507	0	0.1818	0	0.2727	0	0	0	0.5455	0	0.0909	0	0	0	0.0909	0	0	0	-0.1818	0.1818	0.1818	0	0.1818	0	0.0909	0	0	0.0909	0	0.1818	0
OG0001508	0	0.1833	0	0.275	0	0	0	0.55	0	0.0916	0	0	0	0.0916	0	0	0	-0.1833	0.1833	0.1833	0	0.1833	0	0.0916	0	0	0.0916	0	0	0
OG0001509	0	0	0	0.29	0	0	0	0.3867	0	0.0966	0	0	0	0.0966	0	0	0	-0.1933	0.1933	0.1933	0	0.1933	0	0.0966	0	0	-0.0966	0	0	0
OG0001510	0	0.1881	0	0.2822	-0.1881	0	0	0.3763	0	0.094	0.1881	0	0	0.094	0	0	0	-0.1881	0.1881	0.1881	0	0.1881	0	0.094	0	0	0.094	0	0	0
OG0001511	0	0.1775	0	0.2662	-0.1775	0	0	0.5324	0	0.0888	0.1775	0	0	0.0888	0	0	0	-0.1775	0.1775	0.1775	0	0.1775	0	0.2662	0	0	0.0888	0	0	0
OG0001512	0	0.1789	0	0.2683	-0.1789	0	0	0.5367	0	0.0895	0.1789	0	0	0.0895	0	0	0	-0.1789	0.1789	0.1789	0	0.1789	0	0.0895	0	0	0.0895	0	0.1789	0
OG0001513	0	0.1803	0	0.2705	-0.1803	0	0	0.541	0	0.0901	0.1803	0	0	0.0901	0	0	0	-0.1803	0.1803	0.1803	0	0.1803	0	0.0901	0	0	0.0901	0	0	0
OG0001514	0	0.1734	0	0.2601	-0.1734	0	0	0.5203	0	0.0867	0	0	0	0.0867	0	0	0	-0.1734	0.1734	0.1734	0	0.3468	0	0.2601	0	0	0.0867	0	0.1734	0
OG0001515	0	0.1721	0	0.2582	-0.1721	0	0	0.5164	0	0.086	0.1721	0	0	0.086	0	0	0	-0.1721	0.1721	0.1721	0	0.3443	0	0.2582	0	0	0.086	0	0.1721	0
OG0001516	0	0.1818	0	0.2727	-0.1818	0	0	0.3636	0	0.0909	0.1818	0	0	0.0909	0	0	0	-0.1818	0.1818	0.1818	0	0.3636	0	0.0909	0	0	0.0909	0	0.1818	0
OG0001517	0	0.1833	0	0.0916	-0.1833	0	0	0.55	0	0.0916	0.1833	0	0	0.0916	0	0	0	-0.1833	0.1833	0.1833	0	0.1833	0	0.0916	0	0	0.0916	0	0	0
OG0001518	0	0.1865	0	0.2798	0	0	0	0.373	0	0.0932	0.1865	0	0	0.0932	0	0	0	-0.1865	0	0.1865	0	0.373	0	0.0932	0	0	0.0932	0	0.1865	0
OG0001519	0	0.1865	0	0.0932	0	0	0	0.373	0	0.0932	0	0	0	0.0932	0	0	0	-0.1865	0.1865	0.1865	0	0.373	0	0.2798	0	0	0.0932	0	0.1865	0
OG0001520	0	0.1881	0	0.2822	0	0	0	0.3763	0	0.094	0	0	0	0.2822	0	0	0	-0.1881	0	0.1881	0	0.1881	0	0.2822	0	0	-0.094	0	0	0
OG0001521	0	0.1933	0	0.29	0	0	0	0.3867	0	0.0966	0	0	0	0.0966	0	0	0	-0.1933	0.1933	0.1933	0	0.1933	0	0.0966	0	0	0.0966	0	0	0
OG0001522	0	0.1881	0	0.2822	0	0	0	0.1882	0	0.094	0.1881	0	0	0.094	0	0	0	-0.1881	0	0.1881	0	0.3763	0	0.2822	0	0	0.094	0	0.1881	0
OG0001523	0	0.1881	0	0.2822	0	0	0	0.1882	0	0.094	0.1881	0	0	0.094	0	0	0	-0.1881	0	0.1881	0	0.3763	0	0.2822	0	0	0.094	0	0.1881	0
OG0001524	0	0.1898	0	0.2847	0	0	0	0.3797	0	0.0949	0	0	0	0.0949	0	0	0	-0.1898	0	0.1898	0	0.3797	0	0.0949	0	0	0.0949	0	0	0
OG0001525	0	0.1952	0	0.2928	0	0	0	0.1952	0	0.0976	0	0	0	0.0976	0	0	0	-0.1952	0	0.1952	0	0.3904	0	0.0976	0	0	0.0976	0	0	0
OG0001526	0	0.1833	0	0.275	0	0	0	0.3666	0	0.0916	0.1833	0	0	0.0916	0	0	0	-0.1833	0	0.1833	0	0.3667	0	0.275	0	0	0.0916	0	0.1833	0
OG0001527	0	0.1818	0	0.2727	0	0	0	0.3636	0	0.0909	0.1818	0	0	0.0909	0	0	0	-0.1818	0.1818	0.1818	0	0.3636	0	0.2727	0	0	0.0909	0	0.1818	0
OG0001528	0	0.1915	0	0.0958	0	0	0	0.1915	0	0.0958	0.1916	0	0	-0.0958	0	0	0	-0.1916	0	0.1916	0	0.3831	0	0.2873	0	0	0.0958	0	0.1916	0
OG0001529	0	0.1747	0	0.0873	0	0	0	0.5242	0	0.0873	0.1747	0	0	0.2621	0	0	0	-0.1747	0	0.1747	0	0.3495	0	0.2621	0	0	0.0873	0	0.1747	0.1747
OG0001530	0	0.1789	0	0.0895	0	0	0	0.5367	0	0.0895	0.1789	0	0	0.0895	0	0	0	-0.1789	0.1789	0.1789	0	0.3578	0	0.2683	0	0	0.0895	0	0	0
OG0001531	0	0.1833	0	0.275	0	0	0	0.3666	0	0.0916	0.1833	0	0	0.0916	0	0	0	-0.1833	0.1833	0.1833	0	0.3667	0	0.275	0	0	0.0916	0	0	0
OG0001532	0	0.1881	0	0.2822	0	0	0	0.3763	0	0.094	0.1881	0	0	0.094	0	0	0	-0.1881	0.1881	0.1881	0	0.1881	0	0.2822	0	0	0.094	0	0	0
OG0001533	0	0.1865	0	0.2798	0	0	0	0.373	0	0.0932	0.1865	0	0	0.0932	0	0	0	-0.1865	0.1865	0.1865	0	0.373	0	0.0932	0	0	0.0932	0	0	0
OG0001534	0	0.1952	0	0.2928	0	0	0	0	0	0.0976	0.1952	0	0	0.2928	0	0	0	-0.1952	0.1952	0.1952	0	0.1952	0	0.0976	0	0	0.0976	0	0	0
OG0001535	0	0.1849	0	0.2774	0	0	0	0.3698	0	0.0924	0.1849	0	0	0.0924	0	0	0	-0.1849	0.1849	0.1849	0	0.3698	0	0.0924	0	0	0.0924	0	0.1849	0
OG0001536	0	-0.1849	0	0.2774	0	0	0	0.3698	0	0.0924	0.1849	0	0	-0.0924	0	0	0	-0.1849	0.1849	0.1849	0	0.3698	0	0.0924	0	0	0.0924	0	0.1849	0
OG0001537	0	0.1952	0	0.0976	0	0	0	0.1952	0	0.0976	0.1952	0	0	0.0976	0	0	0	-0.1952	0	0.1952	0	0.3904	0	0.0976	0	0	0.0976	0	0.1952	0
OG0001538	0	0.1865	0	0.2798	0	0	0	0.373	0	0.0932	0.1865	0	0	0.0932	0	0	0	-0.1865	0.1865	0.1865	0	0.373	0	0.0932	0	0	0.0932	0	0	0
OG0001539	0	0.1818	0	0.2727	0	0	0	0.3636	0	0.0909	0.1818	0	0	0.0909	0	0	0	-0.1818	0	0.1818	0.1818	0.3636	0	0.2727	0	0	0.0909	0	0.1818	0
OG0001540	0	0.1849	0	0.2774	0	0	0	0.3698	0	0.0924	0.1849	0	0	0.2774	0	0	0	-0.1849	0	0.1849	0	0.1849	0	0.2774	0	0	0.0924	0	0.1849	0
OG0001541	0	0.1898	0	0.2847	0	0	0	0.3797	0	0.0949	0.1898	0	0	0.0949	0	0	0	-0.1898	0	0.1898	0	0.1898	0	0.2847	0	0	0.0949	0	0	0
OG0001542	0	0.1865	0	0.2798	0	0	0	0.373	0	0.0932	0.1865	0	0	0.0932	0	0	0	-0.1865	0	0.1865	0	0.1865	0	0.2798	0	0	0.2798	0	0	0
OG0001543	0	0.1898	0	0.2847	0	0	0	0.1899	0	0.0949	0.1898	0	0	0.0949	0	0	0	-0.1898	0	0.1898	0	0.3797	0	0.2847	0	0	0.0949	0	0	0
OG0001544	0	0.1789	0	0.2683	0	0	0	0.5367	0	0.0895	0.1789	0	0	0.0895	0	0	0	-0.1789	0.1789	0.1789	0	0.3578	0	0.0895	0	0	0.0895	0	0	0
OG0001545	0	0.1898	0	0.2847	0	0	0	0.3797	0	0.0949	0.1898	0	0	0.0949	0	0	0	0	0.1898	0.1898	0	0.3797	0	0.0949	0	0	0.0949	0	0	0
OG0001546	0	0.1971	0	0.2956	0	0	0	0.3942	0	0.0986	0.1971	0	0	0.0986	0	0	0	0	0	0.1971	0	0.1971	0	0.0986	0	0	0.0986	0	0	0
OG0001547	0	0.1898	0	0.2847	0	0	0	0.3797	0	0.0949	0.1898	0	0	0.2847	0	0	0	0	0	0.1898	0	0.1898	0	0.2847	0	0	0.0949	0	0	0
OG0001548	0	0.199	0	-0.0995	0	0	0	0.398	0	0.0995	0	0	0	0.0995	0	0	0	0	0	0.199	0	0.199	0	0.2985	0	0	-0.0995	0	0	0
OG0001549	0	0.1971	0	0.2956	0	0	0	0.197	0	0.0986	0.1971	0	0	0.0986	0	0	0	0	0	0.1971	0	0.3941	0	0.0986	0	0	0.0986	0	0	0
OG0001550	0	0.1789	0	0.2683	0	0	0	0.5367	0	0.0895	0.1789	0	0	0.0895	0	0	0	0	0	0.1789	0	0.3578	0	0.0895	0	0	0.2683	0	0.1789	0
OG0001551	0	0.1881	0	0.2822	0	0	0	0.5644	0	0.094	0.1881	0	0	0.094	0	0	0	0	0	0.1881	0	0.1881	0	0.094	0	0	0.094	0	0	0
OG0001552	0	0.1933	0	0.29	0	0	0	0.1934	0	0.0966	0	0	0	0.29	0	0	0	0	0	0.1933	0	0.3867	0	0.0966	0	0	0.0966	0	0.1933	0
OG0001553	0	0.2031	0	0.3046	0	0	0	0.203	0	0.1016	0.2031	0	0	0.1016	0	0	0	0	0	0.2031	0	0.2031	0	0.1016	0	0	-0.1016	0	0	0
OG0001554	0	0.1865	0	0.2798	0	0	0	0.5595	0	0.0932	0.1865	0	0	0.0932	0	0	0	0	0	0	0	0.1865	0	0.2798	0	0	0.0932	0	0	0
OG0001555	0	0.1865	0	0.2798	0	0	0	0.4663	0	0.0932	0.1865	0	0	0.0932	0	0	0	0	0.1865	0.1865	0	0.373	0	0.0932	0	0	0.0932	0	0	0.0933
OG0001556	0	0.1873	0	0.281	0	0	0	0.4683	0	0.0936	0.1873	0	0	0.281	0	0	0	0	0.1873	0.1873	0	0.3746	0	0.0936	0	0	0.0936	0	0	0
OG0001557	0	0.1961	0	0.2942	0	0	0	0.4903	0	0.098	0.1961	0	0	0.098	0	0	0	0	0	0.1961	0	0.1961	0	0.098	0	0	0.098	0	0.1961	0
OG0001558	0	0.1925	0	0.2887	0	0	0	0.4811	0	0.0963	0.1925	0	0	0.0963	0	0	0	0	0.1925	0.1925	0	0.1925	0	0.2887	0	0	0.0963	0	0	0
OG0001559	0	0.1907	0	0.286	0	0	0	0.4767	0	0.0954	0.1907	0	0	0.0954	0	0	0	0	0.1907	0.1907	0	0.3814	0	0.0954	0	0	0.0954	0	0	0
OG0001560	0	0.1961	0	0.2942	0	0	0	0.4903	0	0.098	0.1961	0	0	0.098	0	0	0	0	0.1961	0.1961	0	0.1961	0	0.098	0	0	0.098	0	0	0
OG0001561	0	0	0	-0.099	0	0	0	0.4951	0	0.297	0.198	0	0	0.099	0	0	0	0	0.198	0	0.198	0.198	0	0.099	0	0	0.099	0	0	0
OG0001562	0	0.1961	0	0.2942	0	0	0	0.4903	0	0.098	0.1961	0	0	0.098	0	0	0	0	0.1961	0.1961	0	0.1961	0	0.098	0	0	0.098	0	0	0
OG0001563	0	0.198	0	0.297	0	0	0	0.4951	0	0.099	0.198	0	0	0.099	0	0	0	0	0	0.198	0	0.198	0	0.099	0	0	0.099	0	0	0
OG0001564	0	0.1925	0	0.2887	0	0	0	0.4811	0	0.2887	0.1925	0	0	0.0963	0	0	0	0	0.1925	0.1925	0	0.1925	0	0.0963	0	0	0.0963	0	0	0
OG0001565	0	-0.1925	0	0.2887	0	0	0	0.4811	0	0.0963	0.1925	0	0	0.0963	0	0	0	0	0.1925	0.1925	0	0.1925	0	0.2887	0	0	0.0963	0	0	0
OG0001566	0	0.1943	0	0.2914	0	0	0	0.4856	0	0.0972	0	0	0	0.0972	0	0	0	0	0.1943	0.1943	0	0.1943	0	0.2914	0	0	0.0972	0	0	0
OG0001567	0	0.3885	0	0.0972	0	0	0	0.4856	0	0.0972	0.1943	0	0	0.0972	0	0	0	0	0.1943	0.1943	0	0.1943	0	0.0972	0	0	0.0972	0	0	0
OG0001568	0	0.3849	0	0.2887	0	0	0	0.4811	0	0.0963	0.1925	0	0	0.0963	0	0	0	0	0	0.1925	0	0.1925	0	0.0963	0	0	0.0963	0	0	0
OG0001569	0	0.3746	0	0.281	0	0	0	0.4683	0	0.0936	0.1873	0	0	0.0936	0	0	0	0	0	0.1873	0	0.3746	0	0.0936	0	0	0.0936	0	0	0
OG0001570	0	0.3885	0	0.2914	0	0	0	0.4856	0	0.0972	0	0	0	0.0972	0	0	0	0	0	0.1943	0	0.1943	0	0.0972	0	0	0.0972	0	0	0
OG0001571	0	0.378	0	0.2835	0	0	0	0.4725	0	0.0945	0	0	0	0.0945	0	0	0	0	0.189	0.189	0	0.189	0	0.2835	0	0	0.0945	0	0	0
OG0001572	0	-0.1907	0	0.286	0	0	0	0.2861	0	0.0954	0.1907	0	0	0.286	0	0	0	0	0.1907	0.1907	0	0.3814	0	0.286	0	0	0.0954	0	0	0
OG0001573	0	0.3682	0	0.2762	0	0	0	0.4603	0	0.092	0.1841	0	0	0.092	0	0	0	0	0.1841	0.1841	0	0.3682	0	0.092	0	0	0.092	0	0	-0.1841
OG0001574	0	0.378	0	0.2835	0	0	0	0.4725	0	0.0945	0.189	0	0	0.0945	0	0	0	0	0.189	0.189	0	0.189	0	0.0945	0	0	0.0945	0	0	-0.189
OG0001575	0	0.3746	0	0.281	0	0	0	0.4683	0	0.0936	0.1873	0	0	0.0936	0	0	0	0	0.1873	0	0	0.1873	0	0.281	0	0	0.0936	0	0	-0.1873
OG0001576	0	0.1857	0	0.2785	0	0	0	0.4642	0	0.0929	0.1857	0	0	0.0929	0	0	0	0	0.1857	0.1857	0	0.3714	0	0.2785	0	0	0.0929	0	0	-0.1857
OG0001577	0	-0.1925	0	0.0963	0	0	0	0.4811	0	-0.0963	0.1925	0	0	0.0963	0	0	0	0	0.1925	0.1925	0	0.3849	0	0.0963	0	0	0.0963	0	0	-0.1925
OG0001578	0	-0.3746	0	0.0936	0	0	0	0.4683	0	0.0936	0.1873	0	0	0.0936	0	0	0	0	0.1873	0.1873	0	0.3746	0	0.0936	0	0	0.0936	0	0	-0.1873
OG0001579	0	-0.3814	0	0.286	0	0	0	0.4767	0	0.0954	0.1907	0	0	0.0954	0	0	0	0	0	0.1907	0	0.1907	0	0.0954	0	0	0.0954	0	0	-0.1907
OG0001580	0	-0.378	0	0.2835	0	0	0	0.4725	0	0.0945	0.189	0	0	0.0945	0	0	0	0	0.189	0.189	0	0.189	0	0.0945	0	0	0.0945	0	0	-0.189
OG0001581	0	-0.3814	0	0.286	0	0	0	0.2861	0	0.0954	0.1907	0	0	0.0954	0	0	0	0	0.1907	0.1907	0	0.3814	0	0.0954	0	0	0.0954	0	0	-0.1907
OG0001582	0	0.106	0	0.318	0	0	0	0.318	0	0.106	0	0	0	0.106	0	0	0	0	0	0.212	0	0.212	0	0.106	0	0	0.106	0	0	-0.212
OG0001583	0	0.0995	0	0.2985	0	0	0	0.4975	0	0.0995	0	0	0	0.0995	0	0	0	0	0	0.199	0	0.199	0	0.2985	0	0	0.0995	0	0	-0.199
OG0001584	0	0.1005	0	0.3015	0	0	0	0.5025	0	0.1005	0	0	0	0.1005	0	0	0	0	0.201	0.201	0	0.201	0	0.1005	0	0	0.1005	0	0	-0.201
OG0001585	0	0.1005	0	0.3015	0	0	0	0.5025	0	0.1005	0.201	0	0	0.1005	0	0	0	0	0	0.201	0	0.201	0	0.1005	0	0	0.1005	0	0	-0.201
OG0001586	0	0.2956	0	0.2956	0	0	0	0.4927	0	0.0986	0.1971	0	0	0.0986	0	0	0	0	0	0.1971	0	0.1971	0	0.0986	0	0	0.0986	0	0	-0.1971
OG0001587	0	0.1016	0	0.3046	0	0	0	0.5077	0	0.1016	0	0	0	0.1016	0	0	0	0	0	0.2031	0	0.2031	0	0.1016	0	0	0.1016	0	0	-0.2031
OG0001588	0	0.0976	0	0.2928	0	0	0	0.488	0	0.0976	0	0	0	0.0976	0	0	0	0	0	0.1952	0	0.3904	0	0.0976	0	0	0.0976	0	-0.1952	-0.1952
OG0001589	0	0.0995	0	0.2985	0	0	0	0.4975	0	0.0995	0.199	0	0	0.0995	0	0	0	0	0	0.199	0	0.199	0	0.0995	0	0	0.0995	0	-0.199	-0.199
OG0001590	0	0.099	0	0.297	0	0	0	0.4951	0	0.099	0	0	0	0.099	0	0	0	0	0	0.198	0	0.198	0	0.099	0	0	0.099	0	-0.198	-0.099
OG0001591	0	0.0836	0	0.2509	0	0	0	0.2509	0	0.0836	0.1672	0	0	0.0836	0	0	0	0	0.3345	0.3345	0	0.1673	0	0.0836	0	0	0.0836	0	-0.3345	-0.1673
OG0001592	0	0.1005	0	0.3015	0	0	0	0.3015	0	0.1005	0.201	0.201	0	0.1005	0	0	0	0	0	0.201	0	0.201	0	0.3015	0	0	0.1005	0	-0.201	-0.201
OG0001593	0	0.1005	0	0.3015	0	0	0	0.5025	0	0.1005	0	0	0	0.1005	0	0	0	0	0	0.201	0	0.201	0	0.1005	0	0	0.1005	0	-0.201	-0.201
OG0001594	0	0.1005	0	0.3015	0	0	0	0.5025	0	-0.1005	0.201	0	0	0.1005	0	0	0	0	0	0	0	0.201	0	0.1005	0	0	0.1005	0	-0.201	-0.201
OG0001595	0	0.1005	0	0.3015	0	0	0	0.5025	0	-0.1005	0	0	0	0.1005	0	0	0	0	0	0.201	0	0.201	0	0.1005	0	0	0.1005	0	-0.201	-0.201
OG0001596	0	0.0976	0	0.2928	0	0	0	0.488	0	0.0976	0	0	0	0.0976	0	0	0	0	0	0.1952	0	0.3904	0	0.0976	0	0	0.0976	0	-0.1952	-0.1952
OG0001597	0	0.0986	0	0.2956	0	0	0	0.4927	0	0.0986	0	0	0	0.0986	0	0	0	0	0.1971	0.1971	0	0	0	0.2956	0	0	0.0986	0	-0.1971	-0.1971
OG0001598	0	0.0966	0	0.29	0	0	0	0.4834	0	0.0966	0	0	0	0.0966	0	0	0	0	0.1933	0.1933	0	0.3867	0	0.0966	0	0	0.0966	0	-0.1933	-0.1933
OG0001599	0	0.0976	0	0.2928	0	0	0	0.488	0	0.0976	0	0	0	0.0976	0	0	0	0	0.1952	0.1952	0	0.1952	0	0.2928	0	0	0.0976	0	-0.1952	-0.1952
OG0001600	0	0.0986	0	0.2956	0	0	0	0.4927	0	0.0986	0	0	0	0.0986	0	0	0	0	0	0.1971	0	0.1971	0	0.2956	0	0	0.0986	0	-0.1971	-0.1971
OG0001601	0.1933	0.0966	0	0.29	0	0	0	0.4834	0	0.0966	0.1933	0	0	0.0966	0	0	0	0	0	0.1933	0	0.1933	0	0.29	0	0	0.0966	0	-0.1933	-0.1933
OG0001602	0.2169	0.1084	0	0.3254	0	0	0	0.3254	0	0.1084	0	0	0	0.1084	0	0	0	0	0.2169	0	0	0.2169	0	0.3254	0	0	0.1084	0	0	0
OG0001603	0	0.3145	0	0.1049	0	0	0	0.5241	0	0.1049	0	0	0	0.1049	0	0	0	0	0.2097	0	0	0.2097	0	0.3145	0	0	0.1049	0	0	0
OG0001604	0	0.3145	0	0.3145	0	0	0	0.5241	0	0.1049	0	0	0	0.1049	0	0	0	0	0	0.2097	0	0.2097	0	0.1049	0	0	0.1049	0	0	0
OG0001605	0	0.1072	0	0.3216	0	0	0	0.5361	0	0.1072	0	0	0	0.1072	0	0	0	0	0	0.2144	0	0.2144	0	0.1072	0	0	0.1072	0	0	0
OG0001606	0	0.1125	0	0.3375	0	0	0	0.3375	0	0.1125	0	0	0	0.1125	0	0	0	0	0	0.225	0	0.225	0	0.1125	0	0	0.1125	0	0	0
OG0001607	0	0.1049	0	0.3145	0	0	0	0.5241	0	0.1049	0	0	0	0.1049	0	0	0	0	0	0.2097	0	0.2097	0	0.3145	0	0	0.1049	0	0	0
OG0001608	0	0.1037	0	0.3111	0	0	0	0.5185	0	0.1037	0	0	0	0.1037	0	0	0	0	0.2074	0.2074	0	0.2074	0	0.3111	0	0	0.1037	0	0	0
OG0001609	0	0.1049	0	0.3145	0	0	0	0.5241	0	0.1049	0.2097	0	0	0.1049	0	0	0	0	0.2097	0.2097	0	0.2097	0	0.1049	0	0	0.1049	0	0	0
OG0001610	0	0.106	0	0.318	0	0	0	0.53	0	0.106	0	0	0	0.106	0	0	0	0	0.212	0.212	0	0.212	0	0.106	0	0	0.106	0	0	0
OG0001611	0	0.1072	0	0.3216	0	0	0	0.5361	0	0.1072	0	0	0	0.1072	0	0	0	0	0	0.2144	0	0.2144	0	0.1072	0	0	0.1072	0	0	0
OG0001612	0	0.1037	0	0.3111	0	0	0	0.5185	0	0.1037	0	0	0	0.1037	0	0	0	0	0.2074	0.2074	0	0.2074	0	0.3111	0	0	0.1037	0	0	0
OG0001613	0	0.3216	0	0.1072	0	0	0	0.5361	0	0.1072	0	0	0	0.1072	0	0	0	0	0	0.2144	0	0.2144	0	0.1072	0	0	0.1072	0	0	0
OG0001614	0	0.1049	0	0.1049	0	0	0	0.5241	0	0.1049	0	0	0	0.1049	0	0	0	0	0.2097	0.2097	0	0.4193	0	0.1049	0	0	0.1049	0	0	0
OG0001615	0	0.1049	0	0.3145	0	0	0	0.5241	0	-0.1049	0.2097	0	0	0.1049	0	0	0	0	0.2097	0.2097	0	0.2097	0	0.1049	0	0	0.1049	0	0	0
OG0001616	0	0.3078	0	0.1026	0	0	0	0.513	0	-0.1026	0	0	0	0.1026	0	0	0	0	0.2052	0.2052	0	0.4104	0	0.1026	0	0	-0.1026	0	0	0
OG0001617	0	0.106	0	0.318	0	0	0	0.318	0	-0.106	0.212	0	0	0.106	0	0	0	0	0.212	0.212	0	0.424	0	0.106	0	0	0.106	0	0	0
OG0001618	0	0.1054	0	0.3162	0	0	0	0.3162	0	0.1054	0.2108	0	0	0.1054	0	0	0	0	0	0.2108	0	0.4216	0	0.1054	0	0	0.1054	0	0	-0.1054
OG0001619	0	0.1049	0	0.3145	0	0	0	0.5241	0	0.1049	0	0	0	0.1049	0	0	0	0	0	0.2097	0	0.2097	0	0.3145	0	0	0.1049	0	0	0
OG0001620	0	0.1037	0	0.3111	0	0	0	0.5185	0	0.1037	0.2074	0	0	0.3111	0	0	0	0	0	0.2074	0	0.2074	0	0.1037	0	0	0.1037	0	0	0
OG0001621	0	0.1084	0	0.3254	0	0	0	0.1085	0	0.1084	0	0	0	0.3254	0	0	0	0	0.2169	0.2169	0	0.2169	0	0.3254	0	0	0.1084	0	0	0
OG0001622	0	0.3015	0	0.3015	0	0	0	0.3015	0	0.1005	0.201	0	0	0.3015	0	0	0	0	0	0.201	0	0.402	0	0.3015	0	0	0.1005	0	0	0
OG0001623	0	0.1049	0	0.3145	0	0	0	0.3145	0	0.1049	0.2097	0	0	0.1049	0	0	0	0	0	0.2097	0	0.4193	0	0.3145	0	0	0.1049	0	0	0
OG0001624	0	0.1111	0	0.3333	0	0	0	0.3333	0	0.1111	0.2222	0	0	0.1111	0	0	0	0	0	0.2222	0	0.2222	0	0.1111	0	0	0.1111	0	0	0
OG0001625	0	0.1097	0	0.3293	0	0	0	0.3293	0	0.1097	0	0	0	0.1097	0	0	0	0	0	0.2195	0	0.2195	0	0.1097	0	0	0.3293	0	0	0
OG0001626	0	0.1049	0	0.3145	0	0	0	0.5241	0	0.1049	0	0	0	0.1049	0	0	0	0	0	0.2097	0	0.2097	0	0.3145	0	0	0.1049	0	0	0
OG0001627	0	0.1111	0	0.1111	0	0	0	0.3333	0	0.1111	0	0	0	0.1111	0	0	0	0	0.2222	0.2222	0	0.2222	0	0.3333	0	0	0.1111	0	0	0
OG0001628	0	0.1072	0	0.3216	0	0	0	0.5361	0	0.1072	0	0	0	0.1072	0	0	0	0	0	0.2144	0	0.2144	0	0.1072	0	0	0.1072	0	0	0
OG0001629	0	0.1084	0	0.3254	0	0	0	0.3254	0	0.1084	0	0	0	0.1084	0	0	0	0	0	0.2169	0	0.4339	0	0.1084	0	0	0.1084	0	0	0
OG0001630	0	0.1079	0	0.3235	0	0	0	0.3235	0	-0.1079	0	0	0	0.1079	0	0	0	0	0	0.2157	0	0.2157	0	0.3235	0	0	0.1079	0	0	-0.1079
OG0001631	0	0.1125	0	0.3375	0	0	0	0.3375	0	0.1125	0	0	0	0.1125	0	0	0	0	0	0.225	0	0.225	0	-0.1125	0	0	-0.1125	0	0	0
OG0001632	0	0.1072	0	0.1072	0	0	0	0.3216	0	0.1072	0	0	0	0.1072	0	0	0	0	0.2144	0.2144	0	0.4288	0	0.3216	0	0	0.1072	0	0	0
OG0001633	0	0.1072	0	0.3216	0	0	0	0.3216	0	0.1072	0.2144	0	0	0.1072	0	0	0	0	0	0.2144	0	0.4288	0	0.1072	0	0	0.1072	0	0	0
OG0001634	0	0.1111	0	0.1111	0	0	0	0.3333	0	0.1111	0.2222	0	0	0.1111	0	0	0	0	0	0.2222	0	0.2222	0	0.3333	0	0	-0.1111	0	0	0
OG0001635	0	0.106	0	0.318	0	0	0	0.106	0	0.106	0.212	0	0	0.106	0	0	0	0	0.212	0.212	0	0.424	0	0.318	0	0	0.106	0	0	0
OG0001636	0	0.1084	0	0.3254	0	0	0	0.3254	0	0.1084	0.2169	0	0	0.1084	0	0	0	0	0	0.2169	0	0.2169	0	0.3254	0	0	0.1084	0	0	0
OG0001637	0	0.1139	0	0.1139	0	0	0	0.3418	0	0.1139	0	0	0	0.1139	0	0	0	0	0.2279	0.2279	0	0.2279	0	0.1139	0	0	0.1139	0	0	0
OG0001638	0	0.1118	0	0.1118	0	0	0	0.3354	0	0.1118	0.2236	0	0	0.1118	0	0	0	0	0	0.2236	0	0.2236	0	0.1118	0	0	0.1118	0	0	-0.1118
OG0001639	0	0.1111	0	0.3333	0	0	0	0.3333	0	0.1111	0.2222	0	0	0.1111	0	0	0	0	0	0.2222	0	0.2222	0	0.1111	0	0	0.1111	0	0	0
OG0001640	0	0.1125	0	0.3375	0	0	0	0.3375	0	0.1125	0	0	0	0.1125	0	0	0	0	0	0.225	0	0.225	0	0.1125	0	0	0.1125	0	0	0
OG0001641	0	0.1125	0	0.3375	0	0	0	0.3375	0	0.1125	0	0	0	0.1125	0	0	0	0	0	0.225	0	0.225	0	0.1125	0	0	0.1125	0	0	0
OG0001642	0	0.1016	0	0.1016	0	0	0	0.5077	0	0.1016	0.2031	0	0	0.1016	-0.2031	0	0	0	0	0.2031	0	0.4061	0	0.3046	0	0	0.1016	0	0	0
OG0001643	0	0.3145	0	0.3145	0	0	0	0.3145	0	0.1049	0.2097	0	0	0.1049	-0.2097	0	0	0	0	0.2097	0	0.2097	0	0.3145	0	0	0.1049	0	0	0
OG0001644	0	0.3254	0	0.1084	0	0	0	0.3254	0	0.1084	0	0	0	0.1084	-0.2169	0	0	0	0	0.2169	0	0.2169	0	0.3254	0	0	0.1084	0	0	0
OG0001645	0	0.1072	0	0.1072	0	0	0	0.3216	0	0.1072	0	0	0	0.1072	-0.2144	0	0	0	0	0.2144	0	0.4288	0	0.3216	0	0	0.1072	0	0	0
OG0001646	0	0.3216	0	0.1072	0	0	0	0.3216	0	0.1072	0	0	0	0.1072	-0.2144	0	0	0	0.2144	0.2144	0	0.2144	0	0.3216	0	0	0.1072	0	0	0
OG0001647	0	0.1111	0	0.1111	0	0	0	0.3333	0	0.1111	0	0	0	0.1111	-0.2222	0	0	0	0	0.2222	0	0.2222	0	0.3333	0	0	0.1111	0	0	0
OG0001648	0	0.1049	0	0.3145	0	0	0	0.3145	0	-0.1049	0	0	0	0.1049	-0.2097	0	0	0	0	0.2097	0	0.4193	0	0.3145	0	0	0.1049	0	0	0
OG0001649	0	0.1111	0	0.1111	0	0	0	0.3333	0	0.1111	0	0	0	0.1111	-0.2222	0	0	0	0	0.2222	0	0.2222	0	0.3333	0	0	0.1111	0	0	0
OG0001650	0	0.1097	0	0.1097	0	0	0	-0.1098	0	0.1097	0	0	0	0.1097	-0.2195	0	0	0	0	0.2195	0	0.4391	0	0.3293	0	0	0.1097	0	0	0
OG0001651	0	0.1111	0	0.3333	0	0	0	0.3333	0	0.1111	0	0	0	0.1111	-0.2222	0	0	0	0	0.2222	0	0.2222	0	0.1111	0	0	0.1111	0	0	0
OG0001652	0.2169	0.1084	0	-0.1084	0	0	0	0.3254	0	0.1084	0.2169	0	0	0.1084	-0.2169	0	0	0	0	0.2169	0	0.2169	0	0.3254	0	0	0.1084	0	0	0
OG0001653	0	0.1026	0	0.3078	0	0	0	0.513	0	0.1026	0.2052	0	0	0.1026	-0.2052	0	0	0	0	0.2052	0	0.2052	0	0.3078	0	0	0.1026	0	0	0
OG0001654	0	0.106	0	0.318	0	0	0	0.318	0	0.106	0	0	0	0.106	-0.212	0	0	0	0	0	0	0.424	0	0.318	0	0	0.106	0	0	0
OG0001655	0	-0.1084	0	0.3254	0	0	0	0.3254	0	0.1084	0	0	0	0.1084	-0.2169	0	0	0	0	0.2169	0	0.2169	0	0.3254	0	0	0.1084	0	0	0
OG0001656	0	0.1111	0	0.3333	0	0	0	0.3333	0	0.1111	0	0	0	0.1111	-0.2222	0	0	0	0	0.2222	0	0.2222	0	0.1111	0	0	0.1111	0	0	0
OG0001657	0.2169	0.1084	0	0.1084	0	0	0	0.5423	0	0.1084	0	0	0	0.1084	-0.2169	0	0	0	0	0	0	0.2169	0	0.1084	0	0	0.1084	0	0	0
OG0001658	0	0.1097	0	0.3293	0	0	0	0.3293	0	0.1097	0	0	0	0.1097	-0.2195	0	0	0	0	0	0	0.2195	0	0.3293	0	0	0.1097	0	0	0
OG0001659	0	0.1084	0	0.3254	0	0	0	0.3254	0	0.1084	0.2169	0	0	-0.1084	-0.2169	0	0	0	0.2169	0.2169	0	0.2169	0	0.1084	0	0	-0.1084	0	0	0
OG0001660	0	0.318	0	0.318	0	0	0	0.318	0	0.106	0	0	0	0.318	-0.212	0	0	0	0	0.212	0	0.212	0	0.106	0	0	0.106	0	0	0
OG0001661	0	0.3254	0	0.3254	0	0	0	0.3254	0	0.1084	0	0	0	0.1084	-0.2169	0	0	0	0	0.2169	0	0.2169	0	0.1084	0	0	0.1084	0	0	0
OG0001662	0	0.3078	0	0.3078	0	0	0	0.3078	0	0.1026	0	0	0	0.3078	-0.2052	0	0	0	0	0.2052	0	0.4104	0	0.1026	0	0	0.1026	0	0	0
OG0001663	0	0.1097	0	0.3293	0	0	0	0.3293	0	0.1097	0.2195	0	0	0.1097	-0.2195	0	0	0	0	0.2195	0	0.2195	0	0.1097	0	0	0.1097	0	0	0
OG0001664	0	0.1111	0	0.3333	0	0	0	0.3333	0	0.1111	0	0	0	0.1111	-0.2222	0	0	0	0	0.2222	0	0.2222	0	0.1111	0	0	0.1111	0	0	0
OG0001665	0	0.1084	0	0.3254	0	0	0	0.3254	0	0.1084	0	0	0	0.1084	-0.2169	0	0	0	0	0.2169	0	0.2169	0	0.3254	0	0	0.1084	0	0	0
OG0001666	0	0.1049	0	0.3145	0	0	0	0.3145	0	0.1049	0	0	0	0.1049	-0.2097	0	0	0	0	0.2097	0	0.4193	0	0.3145	0	0	0.1049	0	0	0
OG0001667	0	0.318	0	0.318	0	0	0	0.318	0	0.106	0	0	0	0.106	-0.212	0	0	0	0	0.212	0	0.212	0	0.318	0	0	0.106	0	0	0
OG0001668	0	0.1118	0	0.3354	0	0	0	0.1118	0	0.1118	0	0	0	0.1118	-0.2236	0	0	0	0	0.2236	0	0.3354	0	0.3354	0	0	0.1118	0	0	0
OG0001669	0	0.1118	0	0.3354	0	0	0	0.3354	0	0.1118	0	0	0	0.1118	-0.2236	0	0	0	0	0.2236	0	0.3354	0	0.1118	0	0	0.1118	0	0	0
OG0001670	0	0.1118	0	0.3354	0	0	0	0.3354	0	0.1118	0	0	0	0.1118	-0.2236	0	0	0	0	0.2236	0	0.3354	0	0.1118	0	0	0.1118	0	0	0
OG0001671	0	0.3354	0	0.3354	0	0	0	0.3354	0	0.1118	0	0	0	0.1118	-0.2236	0	0	0	0	0.2236	0	0.1118	0	0.1118	0	0	0.1118	0	0	0
OG0001672	0	0.1079	0	0.3235	0	0	0	0.3235	0	0.1079	0.2157	0	0	0.1079	-0.2157	0	0	0	0	0.2157	0	0.3235	0	0.3235	0	0	0.1079	0	0	0
OG0001673	0	0.1091	0	0.3273	0	0	0	0.3273	0	0.1091	0	0	0	0.1091	-0.2182	0	0	0	0	0.2182	0	0.3273	0	0.3273	0	0	0.1091	0	0	0
OG0001674	0	0.1091	0	0.3273	0	0	0	0.3273	0	0.1091	0	0	0	0.1091	-0.2182	0	0	0	0	0.2182	0	0.3273	0	0.3273	0	0	0.1091	0	0	0
OG0001675	0	0.1118	0	0.3354	0	0	0	0.3354	0	0.1118	0	0	0	0.1118	-0.2236	0	0	0	0	0.2236	0	0.3354	0	0.1118	0	0	0.1118	0	0	0
OG0001676	0	0.1105	0	0.3313	0	0	0	0.3313	0	0.1105	0.2209	0	0	0.1105	-0.2209	0	0	0	0	0.2209	0	0.3313	0	0.1105	0	0	0.1105	0	0	0
OG0001677	0	0.1097	0	0.3293	0	0	0	0.3293	0	0.1097	0	0	0	0.1097	-0.2195	0	0	0	0	0.2195	0	0.3293	0	0.1097	0	0	0.1097	0	0	-0.1097
OG0001678	0	0.1097	0	0.3293	0	0	0	0.3293	0	0.1097	0	0	0	0.1097	-0.2195	0	0	0	0	0.2195	0	0.3293	0	0.1097	0	0	0.1097	0	0	-0.1097
OG0001679	0	0.1118	0	0.3354	0	0	0	0.3354	0	0.1118	0	0	0	0.1118	-0.2236	0	0	0	0	0.2236	0	0.3354	0	0.1118	0	0	0.1118	0	0	0
OG0001680	0	0.1072	0	0.3216	0	0	0	0.3216	0	0.1072	0	0	0	0.1072	-0.2144	0	0	0	0	0.2144	0	0.3216	0	0.3216	0	0	0.1072	0	0	-0.1072
OG0001681	0	0.1097	0	0.3293	0	0	0	0.3293	0	0.1097	0	0	0	0.1097	-0.2195	0	0	0	0	0.2195	0	0.3293	0	0.1097	0	0	0.1097	0	0	-0.1097
OG0001682	0	0.3354	0	0.1118	0	0	0	0.3354	0	0.1118	0.2236	0	0	0.1118	-0.2236	0	0	0	0	0	0	0.3354	0	0.1118	0	0	0.1118	0	0	0
OG0001683	0	0.1133	0	0.3397	0	0	0	0.1132	0	0.1133	0.2265	0	0	0.1133	-0.2265	0	0	0	0	0.2265	0	0.3397	0	0.1133	0	0	0.1133	0	0	0
OG0001684	0	0.1147	0	0.1147	0	0	0	0.3441	0	0.1147	0	0	0	0.1147	-0.2294	0	0	0	0	0.2294	0	0.3441	0	0.1147	0	0	0.1147	0	0	0
OG0001685	0	0.1105	0	0.3313	0	0	0	0.3313	0	0.1105	0.2209	0	0	0.1105	-0.2209	0	0	0	0	0.2209	0	0.3313	0	0.1105	0	0	0.1105	0	0	0
OG0001686	0	0.1079	0	0.3235	0	0	0	0.3235	0	0.1079	0.2157	0	0	0.1079	-0.2157	0	0	0	0	0.2157	0	0.3235	0	0.3235	0	0	0.1079	0	0	0
OG0001687	0	-0.1079	0	0.3235	0	0	0	0.3235	0	0.1079	0.2157	0	0	0.1079	-0.2157	0	0	0	0	0.2157	0	0.3235	0	0.3235	0	0	0.1079	0	0	0
OG0001688	0	0.1066	0	0.3198	0	0	0	0.3198	0	0.1066	0	0	0	0.3198	-0.2132	0	0	0	0	0.2132	0	0.3198	0	0.3198	0	0	0.1066	0	0	0
OG0001689	0	0.1105	0	0.1105	0	0	0	0.3313	0	0.1105	0.2209	0	0	0.1105	-0.2209	0	0	0	0	0.2209	0	0.3313	0	0.3313	0	0	0.1105	0	0	0
OG0001690	0	0.1079	0	0.1079	0	0	0	0.3235	0	0.1079	0	0	0	0.1079	-0.2157	0	0	0	0	0	0	0.3235	0	0.3235	0	0	-0.1079	0	0	-0.2157
OG0001691	0	0.1072	0	0.3216	0	0	0	0.3216	0	0.1072	0	0	0	0.1072	-0.2144	0	0	0	0.2144	0	0	0.3216	0	0.3216	0	0	0.1072	0	0	-0.1072
OG0001692	0	0.1084	0	0.3254	0	0	0	0.3254	0	0.1084	0	0	0	0.1084	-0.2169	0	0	0	0	0	0	0.3254	0	0.3254	0	0	0.1084	0	0	-0.1084
OG0001693	0	0.1133	0	0.3397	0	0	0	0.3397	0	0.1133	0	0	0	0.1133	-0.2265	0	0	0	0	0	0	0.3397	0	0.1133	0	0	0.1133	0	0	0
OG0001694	0	0.1091	0	0.3273	0	0	0	0.3273	0	0.1091	0.2182	0	0	0.1091	-0.2182	0	0	0	0	0	0	0.3273	0	0.3273	0	0	0.1091	0	0	0
OG0001695	0	0.1105	0	0.3313	0	0	0	0.3313	0	0.1105	0	0	0	0.1105	-0.2209	0	0	0	0	0	0	0.3313	0	0.3313	0	0	0.1105	0	0	0
OG0001696	0	0.1133	0	0.3397	0	0	0	0.3397	0	0.1133	0	0	0	0.1133	-0.2265	0	0	0	0	0	0	0.3397	0	0.1133	0	0	0.1133	0	0	0
OG0001697	0	0.1118	0	0.3354	0	0	0	0.3354	0	0.1118	0.2236	0	0	0.1118	-0.2236	0	0	0	0	0	0	0.3354	0	0.1118	0	0	0.1118	0	0	0
OG0001698	0	0.1133	0	0.3397	0	0	0	0.3397	0	0.1133	0	0	0	0.1133	-0.2265	0	0	0	0	0	0	0.3397	0	0.1133	0	0	0.1133	0	0	0
OG0001699	0	0.1118	0	0.3354	0	0	0	0.3354	0	0.1118	0.2236	0	0	0.1118	-0.2236	0	0	0	0	0	0	0.3354	0	0.1118	0	0	0.1118	0	0	0
OG0001700	0	0.1118	0	0.1118	0	0	0	0.3354	0	0.1118	0.2236	0	0	0.1118	-0.2236	0	0	0	0	0	0	0.3354	0	0.3354	0	0	0.1118	0	0	0
OG0001701	0	0.1118	0	0.3354	0	0	0	0.3354	0	0.1118	0.2236	0	0	0.1118	-0.2236	0	0	0	0	0	0	0.3354	0	0.1118	0	0	0.1118	0	0	0
OG0001702	0	0.1118	0	0.3354	0	0	0	0.3354	0	0.1118	0.2236	0	0	0.1118	-0.2236	0	0	0	0	0	0	0.3354	0	0.1118	0	0	0.1118	0	0	0
OG0001703	0	0.1105	0	0.3313	0	0	0	0.3313	0	0.1105	0.2209	0	0	0.1105	-0.2209	0	0	0	0	0.2209	0	0.1105	0	0.3313	0	0	0.1105	0	0	0
OG0001704	0	0.1133	0	0.1133	0	0	0	0.3397	0	0.1133	0.2265	0	0	0.1133	-0.2265	0	0	0	0	0.2265	0	0.1133	0	0.3397	0	0	0.1133	0	0	0
OG0001705	0	0.1105	0	0.3313	0	0	0	-0.1104	0	0.1105	0	0.2209	0	0.1105	-0.2209	0	0	0	0	0.2209	0	0.3313	0	0.3313	0	0	0.1105	0	0	0
OG0001706	0	0.1054	0	0.3162	0	0	0	0.3162	0	0.1054	0.2108	0.2108	0	0.1054	-0.2108	0	0	0	0	0	0	0.3162	0	0.3162	0	0	0.3162	0	0	0
OG0001707	0	0.1079	0	0.3235	0	0	0	0.3235	0	0.1079	0	0	0	0.1079	-0.2157	0	0	0	0	0	0	0.3235	0	0.3235	0	0	0.3235	0	0	0
OG0001708	0	0.1163	0	0.1163	0	0	0	0.3488	0	0.1163	0	0	0	0.1163	0	0	0	0	0	0	0	0.3487	0	0.1163	0	0	0.3487	0	0	0
OG0001709	0	0.1079	0	0.3235	0	0	0	0.5392	0	0.1079	0	0	0	0.1079	0	0	0	0	0	0	0	0.3235	0	0.3235	0	0	0.1079	0	0	0
OG0001710	0	0.1118	0	0.3354	0	0	0	0.3354	0	0.1118	0.2236	0	0	0.1118	0	0	0	0	0	0	0	0.3354	0	0.3354	0	0	0.1118	0	0	0
OG0001711	0	0.1195	0	0.1195	0	0	0	0.3586	0	0.1195	0	0	0	0.1195	0	0	0	0	0	0	0	0.3586	0	0.1195	0	0	0.1195	0	0	0
OG0001712	0	0.1178	0	0.1178	0	0	0	0.3535	0	0.1178	0.2357	0	0	0.1178	0	0	0	0	0	0	0	0.3536	0	0.1178	0	0	0.1178	0	0	0
OG0001713	0	0.1091	0	0.3273	0	0	0	0.5455	0	0.1091	0	0	0	0.1091	0	0	0	0	0	0	0.2182	0.3273	0	0.1091	0	0	0.1091	0	0	0
OG0001714	0	0.1195	0	0.3586	0	0	0	0.1196	0	-0.1195	0	0	0	0.1195	0	0	0	0	0	0	0	0.3586	0	0.1195	0	0	0.1195	0	0	0
OG0001715	0	0.1147	0	0.1147	0	0	0	0.3441	0	0.1147	0	0	0	0.1147	0	0	0	0	0.2294	0	0	0.3441	0	0.3441	0	0	0.1147	0	0	0
OG0001716	0	0.1147	0	0.3441	0	0	0	0.3441	0	0.1147	0.2294	0	0	0.1147	0	0	0	0	0	0	0	0.3441	0	0.1147	0	0	0.1147	0	0	0
OG0001717	0	0.1133	0	0.3397	0	0	0	0.3397	0	0.1133	0	0	0	0.1133	0	0	0	0	0	0	0	0.3397	0	0.3397	0	0	0.1133	0	0	0
OG0001718	0	0.1178	0	0.1178	0	0	0	0.1179	0	0.1178	0.2357	0	0	0.1178	0	0	0	0	0	0	0	0.3536	0	0.3536	0	0	0.1178	0	0	0
OG0001719	0	0.1079	0	0.1079	0	0	0	0.5392	0	0.1079	0.2157	0	0	0.1079	0	0	0	0	-0.2157	0	0	0.3235	0	0.3235	0	0	0.1079	0	0	0
OG0001720	0	0.1221	0	0.1221	0	0	0	0.2443	0	0.1221	0.2443	0	0	0.1221	0	0	0	0	-0.2443	0	0	0.3665	0	-0.1221	0	0	0.1221	0	0	0
OG0001721	0	0.1204	0	0.3612	0	0	0	0	0	0.1204	0.2408	0	0	0.1204	0	0	0	0	-0.2408	0	0	0.3612	0	0.1204	0	0	0.1204	0	0	0
OG0001722	0	0.1187	0	0.1187	0	0	0	0.4747	0	0.1187	0	0	0	0.1187	0	0	0	0	-0.2374	0	0	0.356	0	0.1187	0	0	0.1187	0	0	0
OG0001723	0	0.1125	0	0.3375	0	0	0	0.45	0	0.1125	0	0	0	0.1125	0	0	0	0	-0.225	0	0	0.3375	0	0.3375	0	0	0.1125	0	0	0
OG0001724	0	0.3419	0	0.1139	0	0	0	0.4558	0	0.1139	0.2279	0	0	0.1139	0	0	0	0	-0.2279	0	0	0.1139	0	0.3419	0	0	0.1139	0	0	0
OG0001725	0	0.1187	0	0.1187	0	0	0	0.4747	0	0.1187	0	0	0	0.1187	0	0	0	0	-0.2374	0	0	0.1187	0	0.356	0	0	0.1187	0	0	0
OG0001726	0	0.1154	0	0.1154	0	0	0	0.4619	0	0.1154	0.2309	0	0	0.1154	0	0	0	0	-0.2309	0	0.2309	0.1154	0	0.3464	0	0	0.1154	0	0	0
OG0001727	0	0.3333	0	0.3333	0	0	0	0.4444	0	0.1111	0.2222	0	0	0.3333	0	0	0	0	-0.2222	0	0	0.1111	0	0.1111	0	0	0.1111	0	0	0
OG0001728	0	0.1125	0	0.3375	0	0	0	0.45	0	0.1125	0	0	0	0.1125	0	0	0	0	-0.225	0	0	0.3375	0	0.3375	0	0	0.1125	0	0	0
OG0001729	0	0.1084	0	0.3254	0	0	0	0.4339	0	0.3254	0	0	0	0.1084	0	0	0	0	-0.2169	0	0.2169	0.3254	0	0.3254	0	0	0.1084	0	0	0
OG0001730	0	0.1125	0	-0.3375	0	0	0	0.45	0	0.1125	0	0	0	0.1125	0	0	0	0	-0.225	0	0	0.3375	0	0.3375	0	0	0.1125	0	0	0
OG0001731	0	0.1139	0	-0.3419	0	0	0	0.4558	0	0.1139	0.2279	0	0	0.1139	0	0	0	0	-0.2279	0	0	0.3419	0	0.1139	0	0	0.1139	0	0	0
OG0001732	0	0.1154	0	-0.3464	0	0	0	0.4619	0	0.1154	0	0	0	0.3464	0	0	0	0	-0.2309	0	0	0.1154	0	0.1154	0	0	0.1154	0	0	0
OG0001733	0	0.1163	0	-0.3487	0	0	0	0.465	0	0.1163	0	0	0	0.1163	0	0	0	0	0	0	0	0.3487	0	0.1163	0	0	0.1163	0	0	0.1163
OG0001734	0	0.1163	0	-0.3487	0	0	0	0.465	0	0.1163	0	0	0	0.1163	0	0	0	0	0	0	0	0.3487	0	0.1163	0	0	0.1163	0	0	0.1163
OG0001735	0	0.1187	0	-0.356	0	0	0	0.4747	0	0.1187	0	0	0	0.1187	0	0	0	0	0	0	0	0.356	0	0.1187	0	0	0.1187	0	0	0
OG0001736	0	0.1154	0	-0.3464	0	0	0	0.4619	0	0.1154	0	0	0	0.1154	0	0	0	0	0	0	0	0.3464	0	0.3464	0	0	0.1154	0	0	0
OG0001737	0	0.1187	0	-0.356	0	0	0	0.4747	0	0.1187	0	0	0	0.1187	0	0	0	0	0	0	0	0.356	0	0.1187	0	0	0.1187	0	0	0
OG0001738	0	0.1231	0	0.2462	0	0	0	0.4924	0	0.1231	0	0	0	0.1231	0	0	0	0	0	0	0	0.3693	0	0.1231	0	0	0.1231	0	0	0
OG0001739	0	0.1195	0	0.239	0	0	0	0.4781	0	0.1195	0	0	0	0.1195	0	0	0	0	0	0	0	0.3586	0	0.1195	0	0	0.3586	0	0	0
OG0001740	0	0.1195	0	0.239	0	0	0	0.4781	0	0.1195	0	0	0	-0.1195	0	0	0	0	0	0	0	0.3586	0	0.1195	0	0	0.3586	0	0	0
OG0001741	0	0.1231	0	0.2462	0	0	0	0.4924	0	0.1231	0	0	0	0.1231	0	0	0	0	0	0	0	0.1231	0	0.3693	0	0	0.1231	0	0	0
OG0001742	0	0.127	0	0.254	0	0	0	0.508	0	0.127	0	0	0	-0.127	0	0	0	0	0	0	0	0.127	0	0.127	0	0	-0.127	0	0	0
OG0001743	0	0.127	0	0.254	0	0	0	0.508	0	0.127	0	0	0	0.127	0	0	0	0	0	0	0	0.127	0	0.127	0	0	-0.127	0	0	0
OG0001744	0	0.1291	0	0	0	0	0	0.5164	0	0.1291	0	0	0	0.1291	0	0	0	0	0	0	0	0.1291	0	0.1291	0	0	0.1291	0	0	0
OG0001745	0	0.1195	0	0.239	0	0	0	0.4781	0	0.1195	0	0	0	0.1195	0	0	0	0	0	0	0	0.3586	0	0.3586	0	0	0.1195	0	0	0
OG0001746	0	0.1231	0	0.2462	0	0	0	0.2462	0	0.1231	0.2462	0	0	0.3693	0	0	0	0	0	0	0	0.3693	0	0.1231	0	0	0.1231	0	0	0
OG0001747	0	0.1178	0	0.2357	0	0	0	0.4714	0	0.1178	0.2357	0	0	0.3536	0	0	0	0	0	0	0	0.3536	0	0.1178	0	0	0.1178	0	0	0
OG0001748	0	-0.1231	0	0.2462	0	0	0	0.4924	0	0.1231	0	0	0	0.1231	0	0	0	0	0	0	0	0.3693	0	0.1231	0	0	-0.1231	0	0	0
OG0001749	0	0.1231	0	0.2462	0	0	0	0.4924	0	0.1231	0	0	0	0.1231	0	0	0	0	0	0	0	0.3693	0	0.1231	0	0	-0.1231	0	0	0
OG0001750	0	0.1195	0	0.239	0	0	0	0.4781	0	0.1195	0	0	0	0.1195	0	0	0	0	0	0	0	0.3586	0	0.1195	0	0	0.3586	0	0	0
OG0001751	0	0.125	0	0.25	0	0	0	0.5	0	0.125	0.25	0	0	0.125	0	0	0	0	0	0	0	0.125	0	0.125	0	0	0.125	0	0	0
OG0001752	0	0.127	0	0.254	0	0	0	0.508	0	0.127	0	0	0	0.127	0	0	0	0	0	0	0	0.127	0	0.127	0	0	-0.127	0	0	0
OG0001753	0	0.1212	0	0.2425	0	0	0	0.4851	0	0.1212	0.2425	0	0	0.1212	0	0	0	0	0	0	0	0.1212	0	0.3638	0	0	-0.1212	0	0	0
OG0001754	0	0.3873	0	0.2582	0	0	0	0.2582	0	0.1291	0	0	0	0.1291	0	0	0	0	0	0	0	0.1291	0	-0.1291	0	0	0.1291	0	0	0
OG0001755	0	0.1212	0	0.2425	0	0	0	0.4851	0	0.1212	0.2425	0	0	0.3638	0	0	0	0	0	0	0	0.1212	0	0.1212	0	0	-0.1212	0	0	0
OG0001756	0	0.127	0	0.254	0	0	0	0.508	0	0.127	0	0	0	0.127	0	0	0	0	0	0	0	0.127	0	0.127	0	0	-0.127	0	0	0
OG0001757	0	0.1231	0	0.2462	0	0	0	0.4924	0	0.1231	0	0	0	0.1231	0	0	0	0	0	0	0	0.1231	0	0.3693	0	0	0.1231	0	0	0
OG0001758	0	-0.1231	0	0.2462	0	0	0	0.4924	0	0.1231	0	0	0	0.1231	0	0	0	0	0	0	0	0.1231	0	0.3693	0	0	-0.1231	0	0	0
OG0001759	0	0.127	0	0.254	0	0	0	0.508	0	0.127	0	0	0	0.127	0	0	0	0	0	0	0	0.127	0	0.127	0	0	-0.127	0	0	0
OG0001760	0	0.1212	0	0.2425	0	0	0	0.4851	0	0.1212	0	0	0	0.3638	0	0	0	0	0	0.2425	0	0.1212	0	0.1212	0	0	-0.1212	0	0	0
OG0001761	0	-0.1231	0	0.2462	0	0	0	0.4924	0	0.1231	0	0	0	0.1231	0	0	0	0	0	0	0	0.1231	0	0.3693	0	0	-0.1231	0	0	0
OG0001762	0	-0.125	0	0.25	0	0	0	0.5	0	0.125	0.25	0	0	0.125	0	0	0	0	0	0	0	0.125	0	0.125	0	0	-0.125	0	0	0
OG0001763	0	-0.127	0	0.254	0	0	0	0.508	0	0.127	0	0	0	-0.127	0	0	0	0	0	0	0	0.127	0	0.127	0	0	-0.127	0	0	0
OG0001764	0	0.127	0	0.254	0	0	0	0.508	0	0.127	0	0	0	-0.127	0	0	0	0	0	0	0	0.127	0	0.127	0	0	0.127	0	0	0
OG0001765	0	0.1231	0	0.2462	0	0	0	0.4924	0	0.1231	0	0	0	-0.1231	0	0	0	0	0	0	0	0.1231	0	-0.1231	0	0	0.3693	0	0	0
OG0001766	0	0.127	0	0.254	0	0	0	0.508	0	0.127	0	0	0	0.127	0	0	0	0	0	0	0	0.127	0	0.127	0	0	0.127	0	0	0
OG0001767	0	0.1163	0	0.2325	0	0	0	0.465	0	0.1163	-0.2325	0	0	0.1163	0	0	0	0	0	0	0	0.3487	0	0.1163	0	0	-0.1163	0	0	0
OG0001768	0	0.125	0	0.25	0	0	0	0.5	0	0.125	-0.25	0	0	0.125	0	0	0	0	0	0	0	0.125	0	-0.125	0	0	-0.125	0	0	0
OG0001769	0	0.1195	0	0.239	0	0	0	0.4781	0	0.1195	-0.239	0	0	-0.1195	0	0	0	0	0	0.239	0	0.3586	0	-0.1195	0	0	-0.1195	0	0	0
OG0001770	0	0.1178	0	0.2357	0	0	0	0.4714	0	0.1178	-0.2357	0	0	0.1178	0	0	0	0	0	0	0	0.3536	0	0.3536	0	0	-0.1178	0	0	0
OG0001771	0	0.1187	0	0.2374	0	0	0	0.4747	0	0.1187	-0.2374	0	0	0.1187	0	0	0	0	0	0	0	0.356	0	0.1187	0	0	-0.1187	0	0	-0.1187
OG0001772	0	0.125	0	0.25	0	0	0	0.5	0	0.125	-0.25	0	0	0.125	0	0	0	0	0	0	0	0.125	0	-0.125	0	0	0.125	0	0	0
OG0001773	0	-0.1178	0	0.2357	0	0	0	0.4714	0	0.3536	-0.2357	0	0	0.1178	0	0	0	0	0	0	0	0.3536	0	0.1178	0	0	-0.1178	0	0	0
OG0001774	0	0.1212	0	0.2425	0	0	0	0.4851	0	0.1212	-0.2425	0	0	0.1212	0	0	0	0	0	0	0	0.3638	0	-0.1212	0	0	-0.1212	0	0	0
OG0001775	0	0.1212	0	0.2425	0	0	0	0.4851	0	0.1212	-0.2425	0	0	0.1212	0	0	0	0	0	0	0	0.1212	0	0.3638	0	0	-0.1212	0	0	0
OG0001776	0	0.1178	0	0.2357	0	0	0	0.4714	0	0.1178	-0.2357	0	0	0.1178	0	0	0	0	0	0	0	0.3536	0	-0.3536	0	0	0.1178	0	0	0
OG0001777	0	0.3375	0	0.225	0	0	0	0.45	0	0.1125	-0.225	0	0	0.1125	0	0	0	0	0	0	0	0.3375	0	-0.3375	0	0	0.1125	0	0	-0.1125
OG0001778	0	0.1212	0	0.2425	0	0	0	0.4851	0	0.1212	-0.2425	0	0	-0.1212	0	0	0	0	0	0	0	0.1212	0	-0.3638	0	0	0.1212	0	0	0
OG0001779	0	0.1178	0	0.2357	0	0	0	0.4714	0	0.1178	-0.2357	0	0	0.1178	0	0	0	0	0	0	0	0.3536	0	-0.3536	0	0	-0.1178	0	0	0
OG0001780	0	0.1178	0	0.2357	0	0	0	0.4714	0	0.1178	-0.2357	0	0	0.1178	0	0	0	0	0	0	0	0.3536	0	-0.3536	0	0	-0.1178	0	0	0
OG0001781	0	0.1178	0	0.2357	0	0	0	0.4714	0	0.1178	-0.2357	0	0	0.1178	0	0	0	0	0	0	0	0.3536	0	-0.3536	0	0	-0.1178	0	0	0
OG0001782	0	0.1231	0	0.2462	0	0	0	0.2462	0	0.1231	-0.2462	0	0	-0.1231	0	0	0	0	0	0	0	0.3693	0	-0.3693	0	0	-0.1231	0	0	0
OG0001783	0	0.1231	0	0.2462	0	0	0	0.2462	0	0.1231	-0.2462	0	0	-0.1231	0	0	0	0	0	0	0	0.3693	0	-0.3693	0	0	-0.1231	0	0	0
OG0001784	0	0.1231	0	0.2462	0	0	0	0.2462	0	0.1231	-0.2462	0	0	-0.1231	0	0	0	0	0	0	0	0.3693	0	-0.3693	0	0	-0.1231	0	0	0
OG0001785	0	0.1241	0	0.2481	0	0	0	0.2481	0	0.1241	-0.2481	0	0	-0.1241	0	0	0	0	0	0	0	0.3721	0	0.2481	0	0	-0.3721	0	0	0
OG0001786	0	0.1281	0	0.2561	0	0	0	0.2561	0	0.1281	0	0	0	0.1281	0	0	0	0	0	0	0	0.3841	0	0.2561	0	0	-0.3841	0	0	0
OG0001787	0	0.1281	0	0.2561	0	0	0	0.2561	0	0.1281	0	0	0	0.1281	0	0	0	0	0	0	0	0.3841	0	0.2561	0	0	-0.3841	0	0	0
OG0001788	0	0.3721	0	0.2481	0	0	0	0.2481	0	0.1241	0	0	0	0.1241	0	0	0	0	0	0	0	0.3721	0	0.2481	0	0	-0.3721	0	0	0
OG0001789	0	0.1281	0	0.2561	0	0	0	0.2561	0	0.1281	0	0	0	0.1281	0	0	0	0	0	0	0	0.3841	0	0.2561	0	0	-0.3841	0	0	0
OG0001790	0	0.1281	0	0.2561	0	0	0	0.2561	0	0.1281	0	0	0	0.1281	0	0	0	0	0	0	0	0.3841	0	0.2561	0	0	-0.3841	0	0	0
OG0001791	0	0.1302	0	0.2604	0	0	0	0.2604	0	0.1302	0	0	0	0.1302	0	0	0	0	0	0.2604	0	0.1302	0	0.2604	0	0	-0.3906	0	0	0
OG0001792	0	0.1281	0	0.2561	0	0	0	0.2561	0	0.1281	0	0	0	0.1281	0	0	0	0	0	0	0	0.3841	0	0.2561	0	0	-0.3841	0	0	0
OG0001793	0	0.1281	0	0.2561	0	0	0	0.2561	0	0.1281	0	0	0	0.1281	0	0	0	0	0	0	0	0.3841	0	0.2561	0	0	-0.3841	0	0	0
OG0001794	0	0.1324	0	0.2649	0	0	0	0.2649	0	0.1324	0	0	0	0.1324	0	0	0	0	0	0	0	0.1324	0	0.2649	0	0	-0.3974	0	0	0
OG0001795	0	0.1281	0	0.2561	0	0	0	0.2561	0	0.1281	0	0	0	0.1281	0	0	0	0	0	0	0	0.3841	0	0.2561	0	0	-0.3841	0	0	0
OG0001796	0	0.1302	0	0.2604	0	0	0	0.2604	0	0.1302	0	0	0	0.1302	0	0	0	0	0	0	0	0.3906	0	0	0	0	-0.3906	0	0	0
OG0001797	0	0.1281	0	0.2561	0	0	0	0.2561	0	0.1281	0	0	0	0.1281	0	0	0	0	0	0	0	0.3841	0	0.2561	0	0	-0.3841	0	0	0
OG0001798	0	0.1302	0	0.2604	0	0	0	0	0	0.1302	0	0	0	0.1302	0	0	0	0	0	0	0	0.3906	0	0.2604	0	0	-0.3906	0	0	0
OG0001799	0	0.1221	0	0.2443	0	0	0	0.4887	0	0.1221	0	0	0	0.1221	0	0	0	0	0	0	0	0.3665	0	0.2443	0	0	-0.3665	0	0	0
OG0001800	0	0.1302	0	0.2604	0	0	0	0.2604	0	0.1302	0	0	0	0.1302	0	0	0	0	0	0	0	0.3906	0	0	0	0	-0.3906	0	0	0
OG0001801	0	0.1281	0	0.2561	0	0	0	-0.2561	0	0.1281	0	0	0	0.1281	0	0	0	0	0	0	0	0.3841	0	0.2561	0	0	-0.3841	0	0	0
OG0001802	0	0.1324	0	0.2649	0	0	0	0.2649	0	0.1324	0	0	0	0.1324	0	0	0	0	0	0	0	0.1324	0	0.2649	0	0	-0.3974	0	0	0
OG0001803	0	0.1324	0	0.2649	0	0	0	0.2649	0	0.1324	0	0	0	0.1324	0	0	0	0	0	0	0	0.1324	0	0.2649	0	0	-0.3974	0	0	0
OG0001804	0	0.1221	0	0.2443	0	0	0	0.4887	0	0.1221	0	0	0	0.1221	0	0	0	0	0	0	0	0.3665	0	0.2443	0	0	-0.3665	0	0	0
OG0001805	0	0.1281	0	0.2561	0	0	0	0.2561	0	0.1281	0	0	0	0.1281	0	0	0	0	0	0	0	0.3841	0	0.2561	0	0	-0.3841	0	0	0
OG0001806	0	-0.1324	0	0.2649	0	0	0	0.2649	0	0.1324	0	0	0	0.1324	0	0	0	0	0	0	0	0.1324	0	0.2649	0	0	-0.3974	0	0	0
OG0001807	0	0.1281	0	0.2561	0	0	0	0.5121	0	0.1281	0	0	0	0.1281	0	0	0	0	0	0	0	0.1281	0	0	0	0	-0.3841	0	0	0
OG0001808	0	0.1221	0	0.2443	0	0	0	0.4887	0	0.1221	0	0	0	0.1221	0	0	0	0	0	0	0	0.3665	0	0.2443	0	0	-0.3665	0	0	0
OG0001809	0	0.1324	0	0.2649	0	0	0	0.2649	0	0.1324	0	0	0	-0.1324	0	0	0	0	0	0	0	0.1324	0	0.2649	0	0	-0.3974	0	0	0
OG0001810	0	0.1281	0	0.2561	0	0	0	0.2561	0	0.1281	0	0	0	0.1281	0	0	0	0	0	0	0	0.3841	0	0.2561	0	0	-0.3841	0	0	0
OG0001811	0	0.1084	0	0.2169	0	0	0	0.2169	0	0.1084	0	0	0	0.1084	0	0	0	0	0	0	0	0.3254	0	0.4339	0	0	-0.3254	0	0	0
OG0001812	0	0.1349	0	0.2697	0	0	0	0.2697	0	0.1349	0	0	0	0.1349	0	0	0	0	0	0	0	0.1349	0	0	0	0	-0.4045	0	0	0
OG0001813	0	0.1324	0	0.2649	0	0	0	0.2649	0	0.1324	0	0	0	-0.1324	0	0	0	0	0	0	0	0.1324	0	0.2649	0	0	-0.3974	0	0	0
OG0001814	0	0.126	0	0.252	0	0	0	0.504	0	0.126	0	0	0	-0.126	0	0	0	0	0	0	0	0.126	0	0.252	0	0	-0.378	0	0	0
OG0001815	0	0.126	0	0.252	0	0	0	0.504	0	0.126	0	0	0	0.126	0	0	0	0	0	0	0	0.126	0	0.252	0	0	-0.378	0	0	0
OG0001816	0	0.1349	0	0	0	0	0	0.2697	0	0.1349	0	0	0	0.1349	0	0	0	0	0	0	0	0.1349	0	0.2697	0	0	-0.4045	0	0	0
OG0001817	0	0.1281	0	0.2561	0	0	0	0.2561	0	0.1281	0	0	0	0.1281	0	0	0	0	0	0	0	0.3841	0	0.2561	0	0	-0.3841	0	0	0
OG0001818	0	0.1241	0	0.2481	0	0	0	0.2481	0	0.3721	0	0	0	0.1241	0	0	0	0	0	0	0	0.3721	0	0.2481	0	0	-0.3721	0	0	0
OG0001819	0	0.1324	0	0.2649	0	0	0	0.2649	0	0.1324	0	0	0	0.1324	0	0	0	0	0	0	0	0.1324	0	0.2649	0	0	-0.3974	0	0	0
OG0001820	0	0.1281	0	0.2561	0	0	0	0.2561	0	0.1281	0	0	0	0.3841	0	0	0	0	0	0	0	0.1281	0	0.2561	0	0	-0.3841	0	0	0
OG0001821	0	0.1281	0	0.2561	0	0	0	0.2561	0	0.1281	0	0	0	0.1281	0	0	0	0	0	0	0	0.3841	0	0.2561	0	0	-0.3841	0	0	0
OG0001822	0	0.1204	0	0.2408	0	0	0	0.4815	0	0.1204	0	0	0	0.1204	0	0	0	0	0	0.2408	0	0.3612	0	0.2408	0	0	-0.3612	0	0	0
OG0001823	0	0.1281	0	0.2561	0	0	0	0.2561	0	0.1281	0	0	0	0.1281	0	0	0	0	0	0	0	0.3841	0	0.2561	0	0	-0.3841	0	0	0
OG0001824	0	0.1281	0	0.2561	0	0	0	0.2561	0	0.1281	0	0	0	0.1281	0	0	0	0	0	0	0	0.3841	0	0.2561	0	0	-0.3841	0	0	0
OG0001825	0	0.1324	0	0.2649	0	0	0	0.2649	0	0.1324	0	0	0	0.1324	0	0	0	0	0	0	0	0.1324	0	0.2649	0	0	-0.3974	0	0	0
OG0001826	0	0.1302	0	0.2604	0	0	0	0.2604	0	0.1302	0	0	0	0.1302	0	0	0	0	0	0	0	0.3906	0	0	0	0	-0.3906	0	0	0
OG0001827	0	0.1324	0	0.2649	0	0	0	0.2649	0	0.1324	0	0	0	0.1324	0	0	0	0	0	0	0	0.1324	0	0.2649	0	0	-0.3974	0	0	0
OG0001828	0	0.1324	0	0.2649	0	0	0	0.2649	0	0.1324	0	0	0	0.1324	0	0	0	0	0	0	0	0.1324	0	0.2649	0	0	-0.3974	0	0	0
OG0001829	0	0.3721	0	0.2481	0	0	0	0.2481	0	0.1241	0	0	0	0.1241	0	0	0	0	0	0	0	0.3721	0	0.2481	0	0	-0.3721	0	0	0
OG0001830	0	0.3841	0	0.2561	0	0	0	0.2561	0	0.1281	0	0	0	0.1281	0	0	0	0	0	0	0	0.1281	0	0.2561	0	0	-0.3841	0	0	0
OG0001831	0	0.1281	0	0.2561	0	0	0	0.5121	0	0.1281	0	0	0	0.1281	0	0	0	0	0	0	0	0.1281	0	0	0	0	-0.3841	0	0	0
OG0001832	0	0.1281	0	0.2561	0	0	0	0.5121	0	0.1281	0	0	0	0.1281	0	0	0	0	0	0	0	0.1281	0	0	0	0	-0.3841	0	0	0
OG0001833	0	0.1241	0	0.2481	0	0	0	0.4961	0	0.1241	0	0	0	0.1241	0	0	0	0	0	0	0.2481	0.1241	0	0.2481	0	0	-0.3721	0	0	0
OG0001834	0	0.126	0	0.252	0	0	0	0.504	0	0.126	0	0	0	0.126	0	0	0	0	0	0	0	0.126	0	0.252	0	0	-0.378	0	0	0
OG0001835	0	0.1324	0	0.2649	0	0	0	0.2649	0	0.1324	0	0	0	0.1324	0	0	0	0	0	0	0	0.1324	0	0.2649	0	0	-0.3974	0	0	0
OG0001836	0	0.1324	0	0.2649	0	0	0	0.2649	0	0.1324	0	0	0	-0.1324	0	0	0	0	0	0	0	0.1324	0	0.2649	0	0	-0.3974	0	0	0
OG0001837	0	0.1302	0	0.2604	0	0	0	0	0	0.1302	0	0	0	-0.1302	0	0	0	0	0	0	0	0.3906	0	0.2604	0	0	-0.3906	0	0	0
OG0001838	0	0.1281	0	0.2561	0	0	0	0.2561	0	0.1281	0	0	0	0.1281	0	0	0	0	0	0	0	0.3841	0	0.2561	0	0	-0.3841	0	0	0
OG0001839	0	0.1302	0	0.2604	0	0	0	0.2604	0	0.1302	0	0	0	-0.1302	0	0	0	0	0	0	0	0.3906	0	0	0	0	-0.3906	0	0	0
OG0001840	0	0.3906	0	0	0	0	0	0.2604	0	0.1302	0	0	0	0.1302	0	0	0	0	0	0	0	0.1302	0	0.2604	0	0	-0.3906	0	0	0
OG0001841	0	0.1349	0	0.2697	0	0	0	0.2697	0	0.1349	0	0	0	0.1349	0	0	0	0	0	0	0	0.1349	0	0	0	0	-0.4045	0	0	0
OG0001842	0	0.1302	0	0.2604	0	0	0	0.2604	0	0.1302	0	0	0	-0.1302	0	0	0	0	0	0	0	0.3906	0	0	0	0	-0.3906	0	0	0
OG0001843	0	0.1281	0	0.2561	0	0	0	0.2561	0	0.1281	0	0	0	0.1281	0	0	0	0	0	0	0	0.3841	0	0.2561	0	0	-0.3841	0	0	0
OG0001844	0	0.126	0	0.252	0	0	0	0.252	0	0.126	0	0	0	0.126	0	0	0	0	0	0.252	0	0.378	0	0.252	0	0	-0.378	0	0	0
OG0001845	0	-0.1302	0	0.2604	0	0	0	0	0	0.1302	0	0	0	0.1302	0	0	0	0	0	0	0	0.3906	0	0.2604	0	0	-0.3906	0	0	0
OG0001846	0	0.1241	0	0	0	0	0	0.4961	0	0.1241	0	0	0	0.1241	0	0	0	0	0	0	0	0.3721	0	0.2481	0	0	-0.3721	0	0	0
OG0001847	0	0.1324	0	0	0	0	0	0	0	0.1324	0	0	0	-0.1324	0	0	0	0	0	0	0	0.3974	0	0.2649	0	0	-0.3974	0	0	0
OG0001848	0	0.1324	0	0.2649	0	0	0	0.2649	0	0.1324	0	0	0	-0.1324	0	0	0	0	0	0	0	0.1324	0	0.2649	0	0	-0.3974	0	0	0
OG0001849	0	0.1281	0	0.2561	0	0	0	0.2561	0	0.1281	0	0	0	0.1281	0	0	0	0	0	0	0	0.3841	0	0.2561	0	0	-0.3841	0	0	0
OG0001850	0	0.1302	0	0.2604	0	0	0	0.2604	0	0.1302	0	0	0	0.1302	0	0	0	0	0	0	0	0.3906	0	0	0	0	-0.3906	0	0	0
OG0001851	0	0.1302	0	0.2604	0	0	0	0.2604	0	0.1302	0	0	0	0.1302	0	0	0	0	0	0	0	0.3906	0	0	0	0	-0.3906	0	0	0
OG0001852	0	0.1281	0	0.2561	0	0	0	0.2561	0	0.1281	0	0	0	0.1281	0	0	0	0	0	0	0	0.3841	0	0.2561	0	0	-0.3841	0	0	0
OG0001853	0	0.1281	0	0	0	0	0	0.2561	0	0.1281	0	0	0	0.1281	0	0	0	0	0	0.2561	0	0.3841	0	0.2561	0	0	-0.3841	0	0	0
OG0001854	0	0.126	0	0.252	0	0	0	0.252	0	0.126	0	0	0	0.126	0	0	0	0	0	0.252	0	0.378	0	0.252	0	0	-0.378	0	0	0
OG0001855	0	0.1349	0	0	0	0	0	0.2697	0	0.1349	0	0	0	0.1349	0	0	0	0	0	0.2697	0	0.1349	0	0	0	0	-0.4045	0	0	0
OG0001856	0	0.1281	0	0.2561	0	0	0	0.2561	0	0.1281	0	0	0	0.1281	0	0	0	0	0	0.2561	0	0.3841	0	0	0	0	-0.3841	0	0	0
OG0001857	0	0.1349	0	0.2697	0	0	0	0.2697	0	0.1349	0	0	0	0.1349	0	0	0	0	0	0	0	0.1349	0	0	0	0	-0.4045	0	0	0
OG0001858	0	0.1349	0	0.2697	0	0	0	0.2697	0	0.1349	0	0	0	0.1349	0	0	0	0	0	0	0	0.1349	0	0	0	0	-0.4045	0	0	0
OG0001859	0	0.1349	0	0.2697	0	0	0	0.2697	0	0.1349	0	0	0	0.1349	0	0	0	0	0	0	0	0.1349	0	0	0	0	-0.4045	0	0	0
OG0001860	0	-0.1281	0	0.2561	0	0	0	0.2561	0	0.1281	0	0	0	-0.1281	0	0	0	0	0	0	0	0.3841	0	0.2561	0	0	-0.3841	0	0	0
OG0001861	0	-0.1281	0	0.2561	0	0	0	0.2561	0	0.3841	0	0	0	0.1281	0	0	0	0	0	0	0	0.1281	0	0.2561	0	0	-0.3841	0	0	0
OG0001862	0	-0.1324	0	0.2649	0	0	0	0.2649	0	0.1324	0	0	0	0.1324	0	0	0	0	0	0	0	0.1324	0	0.2649	0	0	-0.3974	0	0	0
OG0001863	0	0.1324	0	0.2649	0	0	0	0.2649	0	0.1324	0	0	0	0.1324	0	0	0	0	0	0	0	0.1324	0	0.2649	0	0	-0.3974	0	0	0
OG0001864	0	0.1281	0	0.2561	0	0	0	0.2561	0	0.1281	0	0	0	0.1281	0	0	0	0	0	0	0	0.3841	0	0.2561	0	0	-0.3841	0	0	0
OG0001865	0	0.1387	0	0.2774	0	0	0	0.2773	0	0.1387	0	0	0	0.1387	0	0	0	0	0	0	0	0.416	0	0	0	0	0	0	0	0
OG0001866	0	0.1387	0	0.2774	0	0	0	0.2773	0	0.1387	0	0	0	0.1387	0	0	0	0	0	0	0	0.416	0	0	0	0	0	0	0	0
OG0001867	0	0.1444	0	0.2887	0	0	0	0.2887	0	0.1444	0	0	0	0.1444	0	0	0	0	0	0	0	0.1444	0	0	0	0	0	0	0	0
OG0001868	0	0.1387	0	0.2774	0	0	0	0.2773	0	0.1387	0	0	0	0.1387	0	0	0	0	0	0	0	0.1387	0	0.2774	0	0	0.2774	0	0	0
OG0001869	0	-0.1302	0	0.2604	0	0	0	0.2604	0	0.1302	0	0	0	0.1302	0	0	0	0	0	0	0	0.3906	0	0.2604	0	0	0.2604	0	0	-0.1302
OG0001870	0.2722	0.1361	0	0.2722	0	0	0	0.2721	0	0.1361	0	0	0	0.1361	0	0	0	0	0	0	0	0.1361	0	0.2722	0	0	0.2722	0	0	0
OG0001871	0	0.1387	0	0.2774	0	0	0	0.2773	0	0.1387	0	0	0	0.1387	0	0	0	0	0	0	0	0.1387	0	0.2774	0	0	0.2774	0	0	0
OG0001872	0	0.1361	0	0.2722	0	0	0	0.2721	0	0.1361	0	0	0	0.1361	0	0	0	0	0	0.2722	0	0.1361	0	0.2722	0	0	0.2722	0	0	0
OG0001873	0	0.1387	0	0.2774	0	0	0	0.2773	0	0.1387	0	0	0	0.1387	0	0	0	0	0	0	0	-0.1387	0	0.2774	0	0	0.2774	0	0	0
OG0001874	0	0.1337	0	0.2673	0	0	0	0.2673	0	0.1337	0	0	0	0.1337	0	0	0	0	0	0	0	0.4009	0	0.2673	0	0	0.2673	0	0	0
OG0001875	0	0.1337	0	0.2673	0	0	0	0.2673	0	0.1337	0	0	0	0.1337	0	0	0	0	0	0	0	0.4009	0	0.2673	0	0	0.2673	0	0	0
OG0001876	0	0.1361	0	0.2722	0	0	0	0	0	0.1361	0	0	0	0.1361	0	0	0	0	0	0.2722	0	0.4082	0	0.2722	0	0	0	0	0	0
OG0001877	0	0.1337	0	0.2673	0	0	0	0.2673	0	0.1337	0	0	0	0.1337	0	0	0	0	0	0	0	0.4009	0	0.2673	0	0	0.2673	0	0	0
OG0001878	0	0.416	0	0	0	0	0	0.2773	0	0.1387	0	0	0	0.1387	0	0	0	0	0	0	0	0.1387	0	0.2774	0	0	0	0	0	0
OG0001879	0	0.1414	0	0.2828	0	0	0	0.2829	0	0.1414	0	0	0	0.1414	0	0	0	0	0	0	0	0.1414	0	0.2828	0	0	0	0	0	0
OG0001880	0	0.1337	0	0.2673	0	0	0	0.2673	0	0.1337	0	0	0	0.1337	0	0	0	0	0	0	0	0.4009	0	0.2673	0	0	0.2673	0	0	0
OG0001881	0	0.1042	0	0.2085	0	0	0	0.2085	0	0.1042	0	0	0	0.1042	0	0	0	0	0	0	0	0.3128	0	0.417	0	0	0.417	0	0	0
OG0001882	0	0.1337	0	0.2673	0	0	0	0.2673	0	0.1337	0	0	0	0.1337	0	0	0	0	0	0	0	0.4009	0	0.2673	0	0	0.2673	0	0	0
OG0001883	0	0.1361	0	0	0	0	0	0.2721	0	0.1361	0	0	0	0.1361	0	0	0	0	0	0	0	0.4082	0	0.2722	0	0	0.2722	0	0	0
OG0001884	0	0.1414	0	0	0	0	0	0.2829	0	0.1414	0	0	0	0.1414	0	0	0	0	0	0	0	0.1414	0	0.2828	0	0	0.2828	0	0	0
OG0001885	0	0.1337	0	0	0	0	0	0.5345	0	0.1337	0	0	0	0.1337	0	0	0	0	0	0	0	0.1337	0	0.2673	0	0	0.2673	0	0	0
OG0001886	0	0.1054	0	0	0	0	0	0.2108	0	0.1054	0	0	0	0.1054	0	0	0	0	0	0	0	0.3162	0	0.4216	0	0	0.4216	0	0	0
OG0001887	0	0.1361	0	0	0	0	0	0.2721	0	0.1361	0	0	0	0.1361	0	0	0	0	0	0	0	0.4082	0	0.2722	0	0	0.2722	0	0	0
OG0001888	0	0.1387	0	0.2774	0	0	0	0.2773	0	0.1387	0	0	0	-0.1387	0	0	0	0	0	0	0	0.1387	0	0.2774	0	0	0.2774	0	0	0
OG0001889	0	-0.1387	0	0.2774	0	0	0	0.2773	0	0.1387	0	0	0	0.1387	0	0	0	0	0	0	0	0.1387	0	0.2774	0	0	0.2774	0	0	0
OG0001890	0	0.1337	0	0.2673	0	0	0	0.2673	0	0.1337	0	0	0	-0.1337	0	0	0	0	0	0	0	0.4009	0	0.2673	0	0	0.2673	0	0	0
OG0001891	0	0.1414	0	0.2828	0	0	0	0.2829	0	0.1414	0	0	0	0.1414	0	0	0	0	0	0	0	0.1414	0	0	0	0	0.2828	0	0	0
OG0001892	0	0.1387	0	0.2774	0	0	0	0.2773	0	0.1387	0	0	0	0.1387	0	0	0	0	0	0	0	0.1387	0	0.2774	0	0	0.2774	0	0	0
OG0001893	0	0.1361	0	0.2722	0	0	0	0.2721	0	0.1361	0	0	0	0.1361	0	0	0	0	0	0	0	0.4082	0	0	0	0	0.2722	0	0	0
OG0001894	0	0.1337	0	0.2673	0	0	0	0.2673	0	0.1337	0	0	0	0.1337	0	0	0	0	0	0	0	0.4009	0	0.2673	0	0	0.2673	0	0	0
OG0001895	0	0.1361	0	0.2722	0	0	0	0.2721	0	0.1361	0	0	0	-0.1361	0	0	0	0	0	0	0	0.4082	0	0.2722	0	0	0	0	0	0
OG0001896	0	0.4009	0	0.2673	0	0	0	0.2673	0	0.1337	0	0	0	-0.1337	0	0	0	0	0	0	0	0.1337	0	0.2673	0	0	0.2673	0	0	0
OG0001897	0	0.3939	0	0.2626	0	0	0	0.2626	0	0.1313	0	0.2626	0	0.1313	0	0	0	0	0	0	0	0.1313	0	0.2626	0	0	0.2626	0	0	0
OG0001898	0	0.3873	0	0.2582	0	0	0	0.2582	0	0.1291	0	0	0	0.1291	0	0	0	0	0	0	0	0.3873	0	0.2582	0	0	0.2582	0	0	0
OG0001899	0	0.3939	0	0.2626	0	0	0	0.2626	0	0.1313	0	0	0	0.1313	0	0	0	0	0	0	0	0.3939	0	0.2626	0	0	0	0	0	0
OG0001900	0	0.1387	0	0.2774	0	0	0	0	0	0.1387	0	0	0	0.1387	0	0	0	0	0	0	0	0.416	0	0.2774	0	0	0	0	0	0
OG0001901	0	0.1291	0	0.2582	0	0	0	0.5164	0	0.1291	0	0	0	0.1291	0	0	0	0	0	0	0	0.3873	0	0.2582	0	0	0	0	0	0
OG0001902	0	0.1291	0	0.2582	0	0	0	0.5164	0	0.1291	0	0	0	0.1291	0	0	0	0	0	0	0	0.3873	0	0.2582	0	0	0	0	0	0
OG0001903	0	0.1337	0	0.2673	0	0	0	0.2673	0	0.1337	0	0	0	0.1337	0	0	0	0	0	0	0	0.4009	0	0.2673	0	0	0.2673	0	0	0
OG0001904	0	0.1337	0	0.2673	0	0	0	0.2673	0	0.1337	0	0	0	0.1337	0	0	0	0	0	0	0	0.4009	0	0.2673	0	0	0.2673	0	0	0
OG0001905	0	0.1387	0	0.2774	0	0	0	0.2773	0	0.1387	0	0	0	0.1387	0	0	0	0	0	0	0	0.416	0	0	0	0	0	0	0	0
OG0001906	0	0.1361	0	0.2722	0	0	0	0.5443	0	0.1361	0	0	0	0.1361	0	0	0	0	0	0	0	0.1361	0	0	0	0	0	0	0	0
OG0001907	0	0.1361	0	0.2722	0	0	0	0.2721	0	0.1361	0	0	0	-0.1361	0	0	0	0	0	0	0	0.4082	0	0	0	0	0.2722	0	0	0
OG0001908	0	0.1361	0	0.2722	0	0	0	0.2721	0	0.1361	0	0	0	-0.1361	0	0	0	0	0	0	0	0.4082	0	0.2722	0	0	0	0	0	0
OG0001909	0	0.1313	0	0.2626	0	0	0	0.5252	0	0.1313	0	0	0	0.1313	0	0	0	0	0	0	0	0.3939	0	0	0	0	0	0	0	0
OG0001910	0	0.1066	0	0.2132	0	0	0	0.2132	0	0.1066	0	0	0	0.1066	0	0	0	0	0	0	0	0.1066	0	0.4264	0	0	0.4264	0	0	0
OG0001911	0	0.1361	0	0.2722	0	0	0	0.2721	0	0.1361	0	0	0	0.1361	0	0	0	0	0	0	0	0.4082	0	0.2722	0	0	0	0	0	0
OG0001912	0	0.1361	0	0.2722	0	0	0	0.2721	0	0.1361	0	0	0	0.1361	0	0	0	0	0	0	0	0.4082	0	0	0	0	0.2722	0	0	0
OG0001913	0	0.1291	0	0.2582	0	0	0	0.5164	0	0.1291	0	0	0	0.1291	0	0	0	0	0	0	0	0.3873	0	0	0	0	0.2582	0	0	0
OG0001914	0	0.127	0	0.254	0	0	0	0.508	0	0.127	0	0	0	0.127	0	0	0	0	0	0	0	0.381	0	0.254	0	0	0.254	0	0	0
OG0001915	0	0.4009	0	0.2673	0	0	0	0.2673	0	0.1337	0	0	0	-0.1337	0	0	0	0	0	0	0	0.1337	0	0.2673	0	0	0.2673	0	0	0
OG0001916	0	0.1313	0	0.2626	0	0	0	0.5252	0	0.1313	0	0	0	-0.1313	0	0	0	0	0	0	0	0.1313	0	0.2626	0	0	0.2626	0	0	0
OG0001917	0	0.127	0	0.254	0	0	0	0.508	0	0.127	0	0	0	-0.127	0	0	0	0	0	0	0	0.381	0	0.254	0	0	0.254	0	0	0
OG0001918	0	0.1291	0	0	0	0	0	0.5164	0	0.1291	0	0	0	0.1291	0	0	0	0	0	0	0	0.3873	0	0.2582	0	0	0.2582	0	0	0
OG0001919	0	0.1414	0	0	0	0	0	0.2829	0	0.1414	0	0	0	0.1414	0	0	0	0	0	0	0	0.4243	0	0	0	0	0	0	0	0
OG0001920	0	0.1414	0	0.2828	0	0	0	0.2829	0	0.1414	0	0	0	0.1414	0	0	0	0	0	0	0	0.1414	0	0.2828	0	0	0	0	0	0
OG0001921	0	0.1387	0	0.2774	0	0	0	0	0	0.1387	0	0	0	0.1387	0	0	0	0	0	0	0	0.416	0	0.2774	0	0	0	0	0	0
OG0001922	0	0.1361	0	0	0	0	0	0.2721	0	0.1361	0	0	0	-0.1361	0	0	0	0	0	0	0	0.4082	0	0.2722	0	0	0.2722	0	0	0
OG0001923	0	0.1361	0	0.2722	0	0	0	0.2721	0	0.1361	0	0	0	0.1361	0	0	0	0	0	0	0	0.4082	0	0.2722	0	0	0	0	0	0
OG0001924	0	0.1361	0	0.2722	0	0	0	0.2721	0	0.1361	0	0	0	0.1361	0	0	0	0	0	0	0	0.4082	0	0.2722	0	0	0	0	0	0
OG0001925	0	0.1324	0	0.2649	0	0	0	0.2649	0	0.1324	0	0	0	0.1324	0	0	0	0	0	0	0	0.3974	0	0.2649	0	0	0	0	0	-0.1324
OG0001926	0	0.1349	0	0.2697	0	0	0	0.2697	0	0.1349	0	0	0	0.1349	0	0	0	0	0	0	0	0.1349	0	0.2697	0	0	0.2697	0	0	-0.1349
OG0001927	0	0.1281	0	0.2561	0	0	0	0.5121	0	0.1281	0	0	0	0.1281	0	0	0	0	0	0	0	0.1281	0	0.2561	0	0	0.2561	0	0	-0.1281
OG0001928	0	0.1302	0	0.2604	0	0	0	0.2604	0	0.1302	0	0	0	0.1302	0	0	0	0	0	0	0	0.3906	0	0.2604	0	0	0.2604	0	0	-0.1302
OG0001929	0	0.1302	0	0.2604	0	0	0	0.5208	0	0.1302	0	0	0	0.1302	0	0	0	0	0	0	0	0.1302	0	0.2604	0	0	0	0	0	-0.1302
OG0001930	0	0.1313	0	0.2626	0	0	0	0.5252	0	0.1313	0	0	0	0.1313	0	0	0	0	0	0	0	0.1313	0	0.2626	0	0	0.2626	0	0	0
OG0001931	0	0.1313	0	0.2626	0	0	0	0.5252	0	0.1313	0	0	0	0.1313	0	0	0	0	0	0	0	0.1313	0	0.2626	0	0	0.2626	0	0	0
OG0001932	0	0.1337	0	0.2673	0	0	0	0.2673	0	0.1337	0	0	0	0.1337	0	0	0	0	0	0	0	0.4009	0	0.2673	0	0	0.2673	0	0	0
OG0001933	0	0.1361	0	0.2722	0	0	0	-0.2721	0	0.1361	0	0	0	0.1361	0	0	0	0	0	0	0	0.4082	0	0.2722	0	0	0	0	0	0
OG0001934	0	0.1414	0	0.2828	0	0	0	0	0	0.1414	0	0	0	-0.1414	0	0	0	0	0	0	0	0.1414	0	0.2828	0	0	0.2828	0	0	0
OG0001935	0	0.1444	0	0.2887	0	0	0	0	0	0.1444	0	0	0	-0.1444	0	0	0	0	0	0	0	0.1444	0	0.2887	0	0	0	0	0	0
OG0001936	0	0.1444	0	0.2887	0	0	0	0	0	0.1444	0	0	0	-0.1444	0	0	0	0	0	0	0	0.1444	0	0.2887	0	0	0	0	0	0
OG0001937	0	0.1401	0	0.2801	0	0	0	0.1401	0	0.1401	0	0	0	0.1401	0	0	0	0	0	0	0	0.4201	0	0.2801	0	0	0.2801	0	0	0
OG0001938	0	0.1373	0	0.2747	0	0	0	0.4121	0	0.1373	0	0	0	-0.1373	0	0	0	0	0	0	0	0.4121	0	0	0	0	0.2747	0	0	0
OG0001939	0	0.1428	0	0.2857	0	0	0	0.4286	0	0.1428	0	0	0	-0.1428	0	0	0	0	0	0	0	0.1428	0	0	0	0	0.2857	0	0	0
OG0001940	0	0.1349	0	0.2697	0	0	0	0.4045	0	0.1349	0	0	0	-0.1349	0	0	0	0	0	0	0	0.4045	0	0.2697	0	0	0.2697	0	0	0
OG0001941	0	0.1401	0	0.2801	0	0	0	0.4201	0	0.1401	0	0	0	0.1401	0	0	0	0	0	0	0	0.1401	0	0.2801	0	0	0.2801	0	0	0
OG0001942	0	0.1401	0	0.2801	0	0	0	0.4201	0	0.1401	0	0	0	0.1401	0	0	0	0	0	0	0	0.1401	0	0.2801	0	0	0.2801	0	0	0
OG0001943	0	0.1349	0	0.2697	0	0	0	0.4045	0	0.1349	0	0	0	0.1349	0	0	0	0	0	0	0	0.4045	0	0.2697	0	0	0.2697	0	0	0
OG0001944	0	0.1401	0	0.2801	0	0	0	0.4201	0	0.1401	0	0	0	0.1401	0	0	0	0	0	0	0	0.1401	0	0.2801	0	0	0.2801	0	0	0
OG0001945	0	0.1401	0	0.2801	0	0	0	0.4201	0	0.1401	0	0	0	0.1401	0	0	0	0	0	0	0	0.1401	0	0.2801	0	0	0.2801	0	0	0
OG0001946	0	0.1401	0	0.2801	0	0	0	0.4201	0	0.1401	0	0	0	0.1401	0	0	0	0	0	0	0	0.1401	0	0.2801	0	0	0.2801	0	0	0
OG0001947	0	0.1428	0	0.2857	0	0	0	0.4286	0	0.1428	0	0	0	0.1428	0	0	0	0	0	0	0	0.1428	0	0.2857	0	0	0	0	0	0
OG0001948	0	0.1349	0	0.2697	0	0	0	0.4045	0	0.1349	0	0	0	0.1349	0	0	0	0	0	0	0	0.4045	0	0.2697	0	0	0.2697	0	0	0
OG0001949	0	0.1401	0	0.2801	0	0	0	0.4201	0	0.1401	0	0	0	0.1401	0	0	0	0	0	0	0	0.1401	0	0.2801	0	0	0.2801	0	0	0
OG0001950	0	0.1401	0	0.2801	0	0	0	0.4201	0	0.1401	0	0	0	0.1401	0	0	0	0	0	0	0	-0.1401	0	0.2801	0	0	0.2801	0	0	0
OG0001951	0	0.1428	0	0.2857	0	0	0	0.4286	0	0.1428	0	0	0	0.1428	0	0	0	0	0	0	0	0.1428	0	0.2857	0	0	0	0	0	0
OG0001952	0	0.1387	0	0.2774	0	0	0	0.416	0	0.1387	0	0	0	0.1387	0	0	0	0	0	0	0	-0.1387	0	0	0	0	0.2774	0	0	-0.1387
OG0001953	0	0.1349	0	0.2697	0	0	0	0.4045	0	0.1349	0	0	0	0.1349	0	0	0	0	0	0	0	-0.4045	0	0.2697	0	0	0.2697	0	0	0
OG0001954	0	0.1349	0	0.2697	0	0	0	0.4045	0	0.1349	0	0	0	0.1349	0	0	0	0	0	0	0	-0.4045	0	0.2697	0	0	0.2697	0	0	0
OG0001955	0	0.1444	0	0.2887	0	0	0	0.433	0	0.1444	0	0	0	0.1444	0	0	0	0	0	0	0	0.2887	0	0.2887	0	0	0	0	0	0
OG0001956	0	0.1444	0	0.2887	0	0	0	0.433	0	0.1444	0	0	0	0.1444	0	0	0	0	0	0	0	0.2887	0	0.2887	0	0	0	0	0	0
OG0001957	0	0.1349	0	0.2697	0	0	0	0.4045	0	0.1349	0	0	0	0.4045	0	0	0	0	0	0	0	0.2697	0	0.2697	0	0	0	0	0	-0.1349
OG0001958	0	0.1475	0	0.2949	0	0	0	0.4423	0	0.1475	0	0	0	0.1475	0	0	0	0	0	0	0	0	0	0.2949	0	0	0	0	0	0
OG0001959	0	0.1414	0	0.2828	0	0	0	0.4243	0	0.1414	0	0	0	-0.1414	0	0	0	0	0	0.2828	0	0.2828	0	0.2828	0	0	0	0	0	0
OG0001960	0	0.1387	0	0.2774	0	0	0	0.416	0	0.1387	0	0	0	-0.1387	0	0	0	0	0	0.2774	0	0.2774	0	0.2774	0	0	0.2774	0	0	0
OG0001961	0	0.1414	0	0.2828	0	0	0	0.4243	0	0.1414	0	0	0	-0.1414	0	0	0	0	0	0.2828	0	0.2828	0	0.2828	0	0	0	0	0	0
OG0001962	0	0.1373	0	0.2747	0	0	0	0.4121	0	0.1373	0	0	0	0.1373	0	0	0	0	0	0.2747	0	0.2747	0	0.2747	0	0	0	0	0	-0.1373
OG0001963	0	0.1414	0	0.2828	0	0	0	0.4243	0	0.1414	0	0	0	0.1414	0	0	0	0	0	0.2828	0	0.2828	0	0.2828	0	0	0	0	0	0
OG0001964	0	0.1414	0	0.2828	0	0	0	0.4243	0	0.1414	0	0	0	0.1414	0	0	0	0	0	0.2828	0	0.2828	0	0.2828	0	0	0	0	0	0
OG0001965	0	0.1414	0	0.2828	0	0	0	0.4243	0	0.1414	0	0	0	0.1414	0	0	0	0	0	0.2828	0	0.2828	0	0.2828	0	0	0	0	0	0
OG0001966	0	0.416	0	0.2774	0	0	0	0.416	0	0.1387	0	0	0	0.1387	0	0	0	0	0	0	0	0	0	0.2774	0	0	0.2774	0	0	0
OG0001967	0	0.1414	0	0.2828	0	0	0	0.4243	0	0.1414	0	0	0	-0.1414	0	0	0	0	0	0.2828	0	0.2828	0	0	0	0	0.2828	0	0	0
OG0001968	0	0.1414	0	0.2828	0	0	0	0.4243	0	0.1414	0	0	0	0.1414	0	0	0	0	0	0.2828	0	0.2828	0	0	0	0	0.2828	0	0	0
OG0001969	0	0.1444	0	0.2887	0	0	0	0.433	0	0.1444	0	0	0	0.1444	0	0	0	0	0	0.2887	0	0.2887	0	0	0	0	0	0	0	0
OG0001970	0	-0.1475	0	0.2949	0	0	0	0.4423	0	0.1475	0	0	0	0.1475	0	0	0	0	0	0	0	0.2949	0	0	0	0	0	0	0	0
OG0001971	0	0.1387	0	0.2774	0	0	0	0.416	0	0.1387	0	0	0	0.416	0	0	0	0	0	0.2774	0	0.2774	0	0	0	0	0	0	0	0
OG0001972	0	0.1444	0	0.2887	0	0	0	0.433	0	0.1444	0	0	0	-0.1444	0	0	0	0	0	0.2887	0	0.2887	0	0	0	0	0	0	0	0
OG0001973	0	0.1361	0	0.2722	0	0	0	0.4082	0	0.1361	0	0.2722	0	0.1361	0	0	0	0	0	0.2722	0	0.2722	0	0.2722	0	0	0.2722	0	0	0
OG0001974	0	0.1444	0	0.2887	0	0	0	0.433	0	0.1444	0	0	0	-0.1444	0	0	0	0	0	0	0	0.2887	0	0	0	0	0.2887	0	0	0
OG0001975	0	0.1414	0	0.2828	0	0	0	0.4243	0	0.1414	0	0	0	-0.1414	0	0	0	0	0	0	0	0.2828	0	0.2828	0	0	0.2828	0	0	0
OG0001976	0	0.1373	0	0.2747	0	0	0	0.4121	0	0.1373	0	0	0	-0.1373	0	0	0	0	0	0	0	0.2747	0	0.2747	0	0	0.2747	0	0	-0.1373
OG0001977	0	0.1361	0	0.2722	0	0	0	0.4082	0	0.1361	0	0	0	-0.4082	0	0	0	0	0	0.2722	0	0.2722	0	0	0	0	0.2722	0	0	0
OG0001978	0	0.1337	0	0.2673	0	0	0	0.4009	0	0.1337	0	0	0	-0.4009	0	0	0	0	0	0.2673	0	0.2673	0	0.2673	0	0	0.2673	0	0	0
OG0001979	0	0.1361	0	0.2722	0	0	0	0.1361	0	0.1361	0	0	0	-0.4082	0	0	0	0	0	0.2722	0.2722	0.2722	0	0.2722	0	0	0.2722	0	0	0
OG0001980	0	0.1361	0	0.2722	0	0	0	0.1361	0	0.1361	0	0	0	-0.4082	0	0	0	0	0	0.2722	0.2722	0.2722	0	0.2722	0	0	0.2722	0	0	0
OG0001981	0	0.1414	0	0.2828	0	0	0	0.1414	0	0.1414	0	0	0	-0.4243	0	0	0	0	0	0.2828	0	0.2828	0	0.2828	0	0	0	0	0	0
OG0001982	0	0.101	0	0.202	0	0	0	0.101	0	0.101	0	0	0	-0.303	0	0	0	0	0	0.4041	0	0.4041	0	0.4041	0	0	0	0	0	0
OG0001983	0	0.1444	0	0.2887	0	0	0	0.1444	0	0.1444	0	0	0	-0.433	0	0	0	0	0	0	0	0.2887	0	0.2887	0	0	0	0	0	0
OG0001984	0	0.1414	0	0.2828	0	0	0	0.1414	0	0.1414	0	0	0	-0.4243	0	0	0	0	0	0	0	0.2828	0	0.2828	0	0	0.2828	0	0	0
OG0001985	0	0.1373	0	0.2747	0	0	0	0.1373	0	0.1373	0	0	0	-0.4121	0	0	0	0	0	0	0	0.2747	0	0.2747	0	0	0.2747	0	0	0.1373
OG0001986	0	0.1373	0	0.2747	0	0	0	0.1373	0	0.1373	0	0	0	-0.4121	0	0	0	0	0	0.2747	0	0.2747	0	0.2747	0	0	0	0	0	0.1373
OG0001987	0	0.1428	0	0.2857	0	0	0	0.1428	0	0.1428	0	0	0	-0.4286	0	0	0	0	0	0.2857	0	0.2857	0	0.2857	0	0	0	0	0	0.1429
OG0001988	0	0.1414	0	0.2828	0	0	0	0.1414	0	0.1414	0	0	0	-0.4243	0	0	0	0	0	0.2828	0	0.2828	0	0.2828	0	0	0	0	0	0
OG0001989	0	0.149	0	0.2981	0	0	0	-0.149	0	0.149	0	0	0	0.2981	0	0	0	0	0	0.2981	0	0.2981	0	0.2981	0	0	0	0	0	0
OG0001990	0	0.1525	0	0.305	0	0	0	0.1525	0	0.1525	0	0	0	0.305	0	0	0	0	0	0.305	0	0.305	0	0	0	0	0	0	0	0
OG0001991	0	0.0924	0	0.1849	0	0	0	0.2774	0	0.0924	0	0	0	0.3698	0	0	0	0	0	0.3698	0	0.3698	0	0.3698	0	0	0.3698	0	0	0
OG0001992	0	0.1428	0	0.2857	0	0	0	0.4286	0	0.1428	0	0	0	0.2857	0	0	0	0	0	0	0	0.2857	0	0.2857	0	0	0.2857	0	0	0
OG0001993	0	0.149	0	0.2981	0	0	0	0.4472	0	0.149	0	0	0	0.2981	0	0	0	0	0	0	0	0	0	0.2981	0	0	0	0	0	0
OG0001994	0	0.1458	0	0.2917	0	0	0	0.4376	0	0.1458	0	0	0	0.2917	0	0	0	0	0	0	0	0.2917	0	0.2917	0	0	0	0	0	0
OG0001995	0	0.149	0	0.2981	0	0	0	0.149	0	0.149	0	0	0	0.2981	0	0	0	0	0	0	0	0.2981	0	0.2981	0	0	0.2981	0	0	0
OG0001996	0	0.0995	0	0.199	0	0	0	0.0995	0	0.2985	0	0	0	0.398	0	0	0	0	0	0	0	0.398	0	0	0	0	0.398	0	0	0
OG0001997	0	0.149	0	0.2981	0	0	0	0.149	0	0.149	0	0	0	0.2981	0	0	0	0	0	0	0	0.2981	0	0.2981	0	0	0.2981	0	0	0
OG0001998	0	0.149	0	0.2981	0	0	0	0.149	0	0.149	0	0	0	0.2981	0	0	0	0	0	0	0	0.2981	0	0.2981	0	0	0.2981	0	0	0
OG0001999	0	0.1525	0	0.305	0	0	0	0.1525	0	0.1525	0	0	0	0	0	0	0	0	0	0.305	0	0	0	0.305	0	0	0.305	0	0	0
OG0002000	0	0.1525	0	0	0	0	0	0.1525	0	0.1525	0	0	0	0.305	0	0	0	0	0	0.305	0	0.305	0	0	0	0	0.305	0	0	0
OG0002001	0	0.1458	0	0.2917	0	0	0	0.1458	0	0.1458	0	0	0	0.2917	0	0	0	0	0	0.2917	0	0.2917	0	0.2917	0	0	0.2917	0	0	0
OG0002002	0	0.1428	0	0.2857	0	0	0	0.4286	0	0.1428	0	0	0	0	0	0	0	0	0	0.2857	0	0.2857	0	0.2857	0	0	0.2857	0	0	0
OG0002003	0	0.1401	0	0.2801	0	0	0	0.4201	0	0.1401	0	0	0	0.2801	0	0	0	0	0	0.2801	0	0.2801	0	0.2801	0	0	0.2801	0	0	0
OG0002004	0	0.1525	0	0	0	0	0	0.1525	0	0.1525	0	0	0	0.305	0	0	0	0	0	0.305	0	0	0	0.305	0	0	0.305	0	0	0
OG0002005	0	0.1525	0	0	0	0	0	0.1525	0	0.1525	0	0	0	0.305	0	0	0	0	0	0.305	0	0	0	0.305	0	0	0.305	0	0	0
OG0002006	0	0.149	0	0.2981	0	0	0	0.149	0	0.149	0	0	0	0.2981	0	0	0	0	0	0.2981	0	0	0	0.2981	0	0	0.2981	0	0	0
OG0002007	0	0.1525	0	0.305	0	0	0	0.1525	0	0.1525	0	0	0	0.305	0	0	0	0	0	0.305	0	0	0	0.305	0	0	0	0	0	0
OG0002008	0	0.1561	0	0	0	0	0	0.1561	0	0.1561	0	0	0	0.3123	0	0	0	0	0	0.3123	0	0	0	0.3123	0	0	0	0	0	0
OG0002009	0	0.1525	0	0	0	0	0	0.1525	0	0.1525	0	0	0	0.305	0	0	0	0	0	0.305	0	0	0	0.305	0	0	0.305	0	0	0
OG0002010	0	-0.1525	0	0.305	0	0	0	0.1525	0	0.1525	0	0	0	0.305	0	0	0	0	0	0	0	0	0	0.305	0	0	0.305	0	0	0
OG0002011	0	0.1561	0	0.3123	0	0	0	0.1561	0	0.1561	0	0	0	0.3123	0	0	0	0	0	0	0	0	0	0.3123	0	0	0	0	0	0
OG0002012	0	0.149	0	0.2981	0	0	0	0.149	0	0.149	0	0	0	0.2981	0	0	0	0	0	0.2981	0	0	0	0.2981	0	0	0.2981	0	0	0
OG0002013	0	0.1525	0	0	0	0	0	0.1525	0	0.1525	0	0	0	0.305	0	0	0	0	0	0.305	0	0	0	0.305	0	0	0.305	0	0	0
OG0002014	0	0.1458	0	0	0	0	0	0.4376	0	0.1458	0	0	0	0.2917	0	0	0	0	0	0.2917	0	0	0	0.2917	0	0	0.2917	0	0	0
OG0002015	0	0.149	0	0.2981	0	0	0	0.149	0	0.149	0	0	0	0.2981	0	0	0	0	0	0.2981	0	0	0	0.2981	0	0	0.2981	0	0	0
OG0002016	0	0.1458	0	0.2917	0	0	0	0.4376	0	0.1458	0	0	0	0.2917	0	0	0	0	0	0.2917	0	0	0	0	0	0	0.2917	0	0	0
OG0002017	0	0.1458	0	0.2917	0	0	0	0.4376	0	0.1458	0	0	0	0.2917	0	0	0	0	0	0	0	0	0	0.2917	0	0	0.2917	0	0	0
OG0002018	0	0.1444	0	0.2887	0	0	0	0.433	0	0.1444	0	0	0	0	0	0	0	0	0	0	0	0	0	0.2887	0	0	0.2887	0	0	-0.1444
OG0002019	0	0.1561	0	0.3123	0	0	0	0.1561	0	0.1561	0	0	0	0	0	0	0	0	0	0	0	0	0	0.3123	0	0	0.3123	0	0	0
OG0002020	0	0.149	0	0.2981	0	0	0	0.149	0	0.149	0	0	0	0.2981	0	0	0	0	0	0.2981	0	0	0	0.2981	0	0	0.2981	0	0	0
OG0002021	0	0.1525	0	0.305	0	0	0	0.1525	0	0.1525	0	0	0	0.305	0	0	0	0	0	0	0	0	0	0.305	0	0	0.305	0	0	0
OG0002022	0	0.1561	0	0.3123	0	0	0	0.1561	0	0.1561	0	0	0	0.3123	0	0	0	0	0	0	0	0	0	0	0	0	0.3123	0	0	0
OG0002023	0	0.149	0	0.2981	0	0	0	0.4472	0	-0.149	0	0	0	0.2981	0	0	0	0	0	0	0	0	0	0	0	0	0.2981	0	0	0
OG0002024	0	0.149	0	0.2981	0	0	0	0.149	0	-0.149	0	0	0	0.2981	0	0	0	0	0	0.2981	0	0	0	0.2981	0	0	0.2981	0	0	0
OG0002025	0	-0.1525	0	0	0	0	0	0.1525	0	-0.1525	0	0	0	0	0	0	0	0	0	0.305	0	0.305	0	0.305	0	0	0.305	0	0	0
OG0002026	0	0.1458	0	0.2917	0	0	0	0.1458	0	0.1458	0	0	0	0.2917	0	0	0	0	0	0.2917	0	0.2917	0	0.2917	0	0	0.2917	0	0	0
OG0002027	0	0.1458	0	0.2917	0	0	0	0.4376	0	-0.1458	0	0	0	0	0	0	0	0	0	0.2917	0	0	0	0.2917	0	0	0.2917	0	0	0
OG0002028	0	-0.1428	0	0	0	0	0	0.1428	0	0.4286	0	0	0	0.2857	0	0	0	0	0	0.2857	0	0.2857	0	0.2857	0	0	0.2857	0	0	0
OG0002029	0	0.416	0	0	0	0	0	0.1387	0	0.1387	0	0	0	0.2774	0	0	0	0	0	0.2774	0	0.2774	0	0.2774	0	0	0.2774	0	0	-0.1387
OG0002030	0	0.4243	0	0	0	0	0	0.1414	0	0.1414	0	0	0	0	0	0	0	0	0	0.2828	0	0.2828	0	0.2828	0	0	0.2828	0	0	-0.1414
OG0002031	0	0.1475	0	0	0	0	0	0.1475	0	-0.1475	0	0	0	0	0	0	0	0	0	0.2949	0	0.2949	0	0.2949	0	0	0.2949	0	0	-0.1475
OG0002032	0	0.1475	0	0	0	0	0	0.1475	0	-0.1475	0	0	0	0	0	0	0	0	0	0.2949	0	0.2949	0	0.2949	0	0	0.2949	0	0	-0.1475
OG0002033	0	0.1581	0	0	0	0	0	0.1581	0	-0.1581	0	0	0	0	0	0	0	0	0	0	0	0.3162	0	0.3162	0	0	0.3162	0	0	-0.1581
OG0002034	0	0.1581	0	0	0	0	0	0.1581	0	-0.1581	0	0	0	0.3162	0	0	0	0	0	0	0	0.3162	0	0.3162	0	0	0	0	0	-0.1581
OG0002035	0	0.1543	0	0	0	0	0	0.1543	0	0.1543	0	0	0	0.3086	0	0	0	0	0	0	0	0.3086	0	0.3086	0	0	0.3086	0	0	-0.1543
OG0002036	0	0.1475	0	0	0	0	0	0.1475	0	0.4423	0	0	0	0.2949	0	0	0	0	0	0	0	0.2949	0	0.2949	0	0	0.2949	0	0	-0.1474
OG0002037	0	0.1543	0	0	0	0	0	0.1543	0	-0.1543	0	0	0	0.3086	0	0	0	0	0	0	0	0.3086	0	0.3086	0	0	0.3086	0	0	-0.1543
OG0002038	0	0.1543	0	0	0	0	0	0.1543	0	-0.1543	0	0	0	0.3086	0	0	0	0	0	0	0	0.3086	0	0.3086	0	0	0.3086	0	0	-0.1543
OG0002039	0	0.149	0	0.2981	0	0	0	0.149	0	-0.149	0	0	0	0.2981	0	0	0	0	0	0	0	0.2981	0	0.2981	0	0	0	0	0	-0.2981
OG0002040	0	0.1387	0	0.2774	0	0	0	0.416	0	0.416	0	0	0	0.2774	0	0	0	0	0	-0.2774	0	0.2774	0	0.2774	0	0	0	0	0	-0.1387
OG0002041	0	0.1475	0	0.2949	0	0	0	0.1475	0	-0.1475	0	0	0	0.2949	0	0	0	0	0	-0.2949	0	0.2949	0	0.2949	0	0	0.2949	0	0	-0.1474
OG0002042	0	0.1581	0	0.3162	0	0	0	0.1581	0	-0.1581	0	0	0	0.3162	0	0	0	0	0	0	0	0.3162	0	0.3162	0	0	0	0	0	-0.1581
OG0002043	0	0.149	0	0.2981	0	0	0	0.149	0	-0.149	0	0	0	0.2981	0	0	0	0	0	0	0	0.2981	0	0.2981	0	0	0.2981	0	0	-0.2981
OG0002044	0	0.1561	0	0.3123	0	0	0	0.1561	0	-0.1561	0	0	0	0.3123	0	0	0	0	0	0	0	0	0	0	0	0	0.3123	0	0	-0.3123
OG0002045	0	0.1118	0	0.2236	0	0	0	0.1118	0	-0.1118	0	0	0	0	0	0	0	0	0	0	0	0.4472	0	0	0	0	0.4472	0	0	-0.1118
OG0002046	0	0.1458	0	0.2917	0	0	0	0.1458	0	-0.4376	0	0	0	0	0	0	0	0	0	0	0	0.2917	0	0.2917	0	0	0.2917	0	0	-0.2917
OG0002047	0	0.1507	0	0.3015	0	0	0	0.1507	0	-0.4523	0	0	0	0	0	0	0	0	0	0	0	0.3015	0	0.3015	0	0	0.3015	0	0	-0.1508
OG0002048	0	0.1042	0	0.2085	0	0	0	0.1042	0	-0.3128	0	0	0	0.417	0	0	0	0	0	0	0	0.417	0	0	0	0	0.417	0	0	-0.1043
OG0002049	0	0.1475	0	0.2949	0	0	0	0.1475	0	-0.4423	0	0	0	0.2949	0	0	0	0	0	0	0	0.2949	0	0.2949	0	0	0.2949	0	0	-0.1474
OG0002050	0	0.1475	0	0.2949	0	0	0	0.1475	0	-0.4423	0	0	0	0.2949	0	0	0	0	0	0	0	0.2949	0	0.2949	0	0	0.2949	0	0	-0.1474
OG0002051	0	0.1525	0	0	0	0	0	0.1525	0	-0.4575	0	0	0	0.305	0	0	0	0	0	0	0	0.305	0	0	0	0	0	0	0	-0.305
OG0002052	0	0.1507	0	0	0	0	0	0.1507	0	-0.4523	0	0	0	0.3015	0	0	0	0	0	0	0	0.3015	0	0.3015	0	0	0.3015	0	0	-0.1508
OG0002053	0	0.1507	0	0.3015	0	0	0	0.4523	0	-0.4523	0	0	0	0	0	0	0	0	0	0	0	0.3015	0	0	0	0	0	0	0	-0.1508
OG0002054	0	0.1458	0	0.2917	0	0	0	0.1458	0	-0.4376	0	0	0	0	0	0	0	0	0	0	0	0.2917	0	0.2917	0	0	0.2917	0	0	-0.2917
OG0002055	0	0.1507	0	0	0	0	0	0.1507	0	-0.4523	0	0	0	0.3015	0	0	0	0	0	0	0	0.3015	0	0.3015	0	0	0.3015	0	0	-0.1508
OG0002056	0	0.1581	0	0	0	0	0	0.1581	0	-0.4743	0	0	0	0.3162	0	0	0	0	0	0	0	0.3162	0	0	0	0	0	0	0	-0.1581
OG0002057	0	0.149	0	0	0	0	0	0.149	0	-0.4472	0	0	0	0.2981	0	0	0	0	0	0	0	0.2981	0	0.2981	0	0	0	0	0	-0.2981
OG0002058	0	0.1507	0	0	0	0	0	0.4523	0	-0.4523	0	0	0	0	0	0	0	0	0	0	0	0.3015	0	0.3015	0	0	0	0	0	-0.1508
OG0002059	0	0.1543	0	0	0	0	0	0.1543	0	-0.4629	0	0	0	0.3086	0	0	0	0	0	0	0	0.3086	0	0.3086	0	0	0	0	0	-0.1543
OG0002060	0	0.1458	0	0	0	0	0	0.1458	0	-0.4376	0	0	0	0.2917	0	0	0	0	0	0	0	0.2917	0	0.2917	0	0	0.2917	0	0	-0.2917
OG0002061	0	0.1543	0	0	0	0	0	0.1543	0	-0.4629	0	0	0	0.3086	0	0	0	0	0	0	0	0.3086	0	0.3086	0	0	0	0	0	-0.1543
OG0002062	0	0.1507	0	0.3015	0	0	0	0.1507	0	-0.4523	0	0	0	0.3015	0	0	0	0	0	0	0	0.3015	0	0.3015	0	0	0	0	0	-0.1508
OG0002063	0	0.1507	0	0.3015	0	0	0	0.1507	0	-0.4523	0	0	0	0.3015	0	0	0	0	0	0	0	0.3015	0	0.3015	0	0	0	0	0	-0.1508
OG0002064	0	-0.1507	0	0.3015	0	0	0	0.1507	0	-0.4523	0	0	0	0.3015	0	0	0	0	0	0	0	0.3015	0	0	0	0	0.3015	0	0	-0.1508
OG0002065	0	0.1543	0	0.3086	0	0	0	0.1543	0	-0.4629	0	0	0	0	0	0	0	0	0	0	0	0	0	0.3086	0	0	0.3086	0	0	-0.1543
OG0002066	0	0.149	0	0	0	0	0	0.149	0	-0.4472	0	0	0	0	0	0	0	0	0	0	0	0.2981	0	0.2981	0	0	0.2981	0	0	-0.2981
OG0002067	0	0.1428	0	0.2857	0	0	0	0.1428	0	-0.4286	0	0	0	0.2857	0	0	0	0	0	0	0	0.2857	0	0.2857	0	0	0.2857	0	0	-0.2857
OG0002068	0	0.1195	0	0.239	0	0	0	0.3586	0	-0.3586	0	0	0	0	0	0	0	0	0	0	0	0.239	0	0.239	0	0	0	0	0	-0.5976
OG0002069	0	0.1091	0	0.2182	0	0	0	0.1091	0	-0.3273	0	0	0	0.4364	0	0	0	0	0	0	0	0	0	0.4364	0	0	0	0	0	-0.1091
OG0002070	0	0.1475	0	0.2949	0	0	0	0.1475	0	-0.4423	0	0	0	0.2949	0	0	0	0	0	0	0	0.2949	0	0.2949	0	0	0.2949	0	0	-0.1474
OG0002071	0	0.1507	0	0.3015	0	0	0	0.1507	0	-0.4523	0	0	0	0.3015	0	0	0	0	0	0	0	0.3015	0	0.3015	0	0	0	0	0	-0.1508
OG0002072	0	0.1475	0	0.2949	0	0	0	0.1475	0	-0.4423	0	0	0	0.2949	0	0	0	0	0	0	0	0.2949	0	0.2949	0	0	0.2949	0	0	-0.1474
OG0002073	0	0.1543	0	0.3086	0	0	0	0.1543	0	-0.4629	0	0	0	0	0	0	0	0	0	0	0	0.3086	0	0.3086	0	0	0	0	0	-0.1543
OG0002074	0	0.1507	0	0.3015	0	0	0	0.1507	0	-0.4523	0	0	0	0.3015	0	0	0	0	0	0	0	0.3015	0	0.3015	0	0	0	0	0	-0.1508
OG0002075	0	0.1525	0	0.305	0	0	0	0.1525	0	-0.4575	0	0	0	0.305	0	0	0	0	0	0	0	0.305	0	0.305	0	0	0	0	0	0
OG0002076	0	0.1525	0	0.305	0	0	0	0.1525	0	-0.4575	0	0	0	0.305	0	0	0	0	0	0	0	0.305	0	0.305	0	0	0	0	0	0
OG0002077	0	0.149	0	0.2981	0	0	0	0.149	0	-0.4472	0	0	0	0.2981	0	0	0	0	0	0	0	0.2981	0	0.2981	0	0	0.2981	0	0	0
OG0002078	0	0.149	0	0.2981	0	0	0	0.149	0	-0.4472	0	0	0	0.2981	0	0	0	0	0	0	0	0.2981	0	0.2981	0	0	0.2981	0	0	0
OG0002079	0	0.1525	0	0.305	0	0	0	0.1525	0	-0.4575	0	0	0	0.305	0	0	0	0	0	0	0	0.305	0	0.305	0	0	0	0	0	0
OG0002080	0	0.1525	0	0.305	0	0	0	0.1525	0	-0.4575	0	0	0	0.305	0	0	0	0	0	0	0	0.305	0	0.305	0	0	0	0	0	0
OG0002081	0	0.1525	0	0.305	0	0	0	0.1525	0	-0.4575	0	0	0	0.305	0	0	0	0	0	0	0	0.305	0	0.305	0	0	0	0	0	0
OG0002082	0	0.1543	0	0.3086	0	0	0	0.4629	0	0.3086	0	0	0	0.3086	0	0	0	0	0	0	0	0.3086	0	0.3086	0	0	0	0	0	0
OG0002083	0	0.1666	0	0	0	0	0	0.1666	0	0.3333	0	0	0	0.3333	0	0	0	0	0	0	0	0.3333	0	0.3333	0	0	0	0	0	0
OG0002084	0	0.433	0	0.2887	0	0	0	0.433	0	0.2887	0	0	0	0.2887	0	0	0	0	0	0	0	0.2887	0	0.2887	0	0	0.2887	0	0	0
OG0002085	0	0.4743	0	0	0	0	0	0.1581	0	0.3162	0	0	0	0.3162	0	0	0	0	0	0	0	0.3162	0	0.3162	0	0	0	0	0	0
OG0002086	0	0.4629	0	0.3086	0	0	0	0.1543	0	0	0	0	0	0.3086	0	0	0	0	0	0	0	0.3086	0	0.3086	0	0	0.3086	0	0	0
OG0002087	0	0.4629	0	0	0	0	0	0.1543	0	0.3086	0	0	0	0.3086	0	0	0	0	0	0	0	0.3086	0	0.3086	0	0	0.3086	0	0	0
OG0002088	0	0.4523	0	0.3015	0	0	0	0.1507	0	0.3015	0	0	0	0.3015	0	0	0	0	0	0	0	0.3015	0	0.3015	0	0	0.3015	0	0	0
OG0002089	0	0.4743	0	0	0	0	0	0.1581	0	0.3162	0	0	0	0	0	0	0	0	0	0	0	0.3162	0	0.3162	0	0	0.3162	0	0	0
[truncated: 470 more rows]
