# Supplementary material for: Microbiome Assessment of Global Oil Reservoirs Reveals Site-Specific Hydrocarbon Degradation Functional Profiles
Source: Preprints.org preprint supplement (doi:10.20944/preprints202108.0092.v1), 2021-08-03
Supplement: Supplementary file 2 [file SupplementaryTable1.xlsx]

## Sheet: Table S1
Supplementary Table 1. Metagenome datasets information
Sample Name	GenBank acquisition number	Location	Sample type	Temperature	Reference
Jiangsu W15-5	SAMN06554010	Jiangsu Oil Reservoir, China	Produced Water	N.A.	[11]
Jiangsu W9-18	SAMN06554009		Produced Water	N.A.
Jiangsu W2-71	SAMN06554008		Produced Water	N.A.
SB1	SAMN03408292	Schrader Bluff Formation, Alaska North Slope	Produced Water	24 – 27	[6]
SB2	SAMN03408293		Produced Water	24 – 27
I1	SAMN03408296	Ivishak Formation, Alaska	Produced Water	80 – 83
I2	SAMN03408297		Produced Water	80 – 83
K2	SAMN03408294	Kuparuk Formation	Produced Water	47 – 70
K3	SAMN03408295		Produced Water	47 - 70
QH	SAMN02837166	Qinghain Oil Field, China	Oil	High Temperature	[2]
DQ	SAMN03360377	Daqing Oil Field, China	Oil	High temperature
Production Well	SAMN05790837	Shengli Oil Field, China	Produced fluids	63	[12]
BA-1	SAMN19157534	Miranga Oil Field, Brazil	Oil	50	[3]
6111_O	SAMN09914236	Shen84 Liaohe Oil Field, China	Produced Water	39	[1]
6111_W	SAMN09914235		Produced Water	41
AJ-5	SAMN09914234		Recycled Injection Water	45
71551	SAMN09914233		Produced Water	40
