# Supplementary material for: Microbiome Assessment of Global Oil Reservoirs Reveals Site-Specific Hydrocarbon Degradation Functional Profiles
Source: Preprints.org preprint supplement (doi:10.20944/preprints202108.0092.v1), 2021-08-03
Supplement: Supplementary file 3 [file SupplementaryTable2.xlsx]

## Sheet: Table S2
Supplementary Table 2. List of specific genes according to KEGG database
KO	GENNAME	PATHWAY	MODULE	MODULE KEY	Metabolism
K17754	cpnA	Ring Cleavage via Baeyer-Villiger oxidation	N.D.	1	Aerobic Hydrocarbons degradation
K19960	chnA
K03379	chnB
K01053	gnl
K00002	AKR1A1
K19961	chnD
K14519	aldH
K14579	nahAc	Naphthalene degradation	M00534	2	Aerobic Hydrocarbons degradation
K14580	nahaAd
K14578	nahAb
K14581	nahaAd
K14582	nahB
K14583	nahC
K14584	nahD
K14585	nahE
K00152	nahF
K08689	bphAa	Biphenyl degradation	M00543	3	Aerobic Hydrocarbons degradation
K15750	bphAb
K18087	bphAc
K18088	bphAd
K08690	bphB
K00462	bphC
K10222	bphD
K00496	alkB2	Alkane-degradation	N.D.	4	Aerobic Hydrocarbons degradation
K20938	ladA
K05549	benA-xylX	Benzoate degradation	M00551	5	Aerobic Hydrocarbons degradation
K05550	benB-xylY
K05784	benC-xylZ
K05783	benD-xylL
K00446	dmpB	Catechol meta-cleavage	M00569	6	Aerobic Hydrocarbons degradation
K07104	catE
K10217	dmpC
K01821	praC
K01617	dmpH
K10216	dmpD
K18364	bpnH
K02554	mhpD
K18365	bphI
K01666	mhpE
K18366	bphJ
K04073	mhpF
K03381	catA	Catechol ortho-cleavage	M00568	7	Aerobic Hydrocarbons degradation
K01856	catB
K03464	catC
K01055	pcaD
K14727	pcaL
K16249	dmpK	Benzene degradation, aerobic	M00548	8	Aerobic Hydrocarbons degradation
K16243	dmpL
K16244	dmpM
K16242	dmpN
K16245	dmpO
K16246	dmpP
K01612	bsdC	phenol degradation, anaerobic	N.D.	9	Anaerobic Hydrocarbons degradation
K21759	bsdD
K03186	bsdB
K04105	hbaA
K04107	hbaB
K04108	hbaC
K04109	hbaD
K07540	bss	Toluene degradation, anaerobic	M00418	10	Anaerobic Hydrocarbons degradation
K07543	bbsE
K07544	bbsF
K07545	bbsG
K07546	bbsH
K07547	bbsC
K07548	bbsD
K07549	bbsA
K07550	bbsB
K04112	bcrC	Benzoyl-CoA degradation, anaerobic	M00541	11	Anaerobic Hydrocarbons degradation
K04110	badA
K04113	bcrB
K04114	bcrA
K04115	bcrD
K07537	dch
K07538	had
K07539	oah
K19515	bamB
K19516	bamC
K00200	fwdA	Methanogenesis, CO2	M00567	12	Methanogenesis
K00201	fwdB
K00202	fwdC
K00203	fwdD
K11261	fwdE
K00205	fwdF
K11260	fwdG
K00204	fwdH
K00672	ftr
K01499	mch
K00319	mtd
K13942	hmd
K00320	mer
K00577	mtrA
K00578	mtrB
K00579	mtrC
K00580	mtrD
K00581	mtrE
K00582	mtrF
K00583	mtrG
K00584	mtrH
K00399	mcrA
K00401	mcrB
K00402	mcrG
K22480	hdrA1
K22481	hdrB1
K22482	hdrC1
K03388	hdrA2
K03389	hdrB2
K03390	hdrC2
K14127	mvhD
K14126	mvhA
K14128	mvhG
K22516	fdhA
K00125	fdhB
K00925	ackA	Methanogenesis, acetate	M00357	13	Methanogenesis
K00625	E2.3.1.8
K01895	ACSS1_2
K00193	cdhC
K00197	cdhE
K00194	cdhE
K00577	mtrA
K00578	mtrB
K00579	mtrC
K00580	mtrD
K00581	mtrE
K00582	mtrF
K00583	mtrG
K00584	mtrH
K00399	mcrA
K00401	mcrB
K00402	mcrG
K22480	hdrA1
K22481	hdrB1
K22482	hdrC1
K03388	hdrA2
K03389	hdrB2
K08264	hdrD
K08265	hdrE
K03388	hdrA2
K03389	hdrB2
K03390	hdrC2
K14127	mvhD
K14126	mvhA
K14128	mvhG
K22516	fdhA
K00125	fdhB
K14080	mtaA
K04480	mtaB
K14081	mtaC
K00399	mcrA
K00401	mcrB
K00402	mcrG
K22480	hdrA1
K22481	hdrB1
K22482	hdrC1
K03388	hdrA2
K03389	hdrB2
K03390	hdrC2
K08264	hdrD
K08265	hdrE
K03388	hdrA2
K03389	hdrB2
K03390	hdrC2
K14127	mvhD
K14216	mvhA
K14128	mvhG
K22516	fdhA
K00125	fdhB
K14082	mtbA	Methanogenesis, methylamines	M00563	14	Methanogenesis
K16177	mtmC
K16176	mtmB
K16179	mtbC
K16178	mtbB
K14084	mttC
K14083	mttB
K00399	mcrA
K00401	mcrB
K00402	mcrG
K22480	hdrA1
K22481	hdrB1
K22482	hdrC1
K03388	hdrA2
K03389	hdrB2
K03390	hdrC2
K08264	hdrD
K08265	hdrE
K03388	hdrA2
K03389	hdrB2
K03390	hdrC2
K14127	mvhD
K14126	mvhA
K14128	mvhG
K22516	fdhA
K00125	fdhB
K22516	fdhA	Methanogenesis, methylamines	M00356	15	Methanogenesis
K00125	fdhB
K22480	hdrA1
K03388	hdrA2
K22481	hdrB1
K03389	hdrB2
K22482	hdrC1
K03390	hdrC2
K08264	hdrD
K08265	hdrE
K00399	mcrA
K00401	mcrB
K00402	mcrG
K14080	mtaA
K04480	mtaB
K14081	mtaC
K14216	mvhA
K14127	mvhD
K14128	mvhG
K08097	comA	Coenzyme M biosynthesis	M00358	16	Methanogenesis
K05979	comB
K05884	comC
K13039	comE
K06034	comD
K00370	narG	Disissimilatory nitrate reduction	M00530	17	Nitrogen Metabolism
K00371	narH
K00374	narI
K02567	napA
K02568	napB
K00362	nirB
K00363	nirD
K03385	nrfA
K00958	sat	Dissimilatory sulfate reduction	M00596	18	Sulfur Metabolism
K00394	aprA
K00395	aprB
K11180	dsrA
K11181	dsrB
