# Supplementary material for: Microbiome Assessment of Global Oil Reservoirs Reveals Site-Specific Hydrocarbon Degradation Functional Profiles
Source: Preprints.org preprint supplement (doi:10.20944/preprints202108.0092.v1), 2021-08-03
Supplement: Supplementary file 4 [file SupplementaryTable3.xlsx]

## Sheet: Table S3
Supplementary Table 3. Assemblies statistics
Assembly	Metagenomes	Location	Filtered reads	Contigs number	Largest contig	N50
Co-assembly1	Jiangsu-W15-5	Jiangsu Oil Reservoir, China	3846852	11484	176481	7360
	Jiangsu-W2-71		4581248
	Jiangsu-W9-18		5102395
Co-assembly2	SB1	Schrader Bluff Formation, Alaska	14689002	45789	532290	6105
	SB2		15778766
Co-assembly3	I2	Ivishak Formation, Alaska	32328554	10637	396913	15449
	K2		19065258
	K3		42326820
Co-assembly4	6111_W	Liaohe Oil Field, China	8437712	36119	683395	5696
	6111_O		19729010
	AJ-5		20044560
Assembly	71551		21846467	3244	1261821	20399
Assembly	I1	Ivishak Formation, Alaska	37311462	1258	280371	59239
Assembly	Production well	Shengli Oil Field, China	10333515	2159	346479	19647
Assembly	QH	Qinghai Oil Field, China	18640048	13011	329801	5639
Assembly	DQ	Daqing Oil Field, China	25367516	16998	85048	2161
Assembly	BA-1	Miranga Oil Field, Brazil	32552225	22194	308803	6675
