# Supplementary material for: Microbiome Assessment of Global Oil Reservoirs Reveals Site-Specific Hydrocarbon Degradation Functional Profiles
Source: Preprints.org preprint supplement (doi:10.20944/preprints202108.0092.v1), 2021-08-03
Supplement: Supplementary file 5 [file SupplementaryTable4.xlsx]

## Sheet: Table S4
Supplementary Table 4. Complete list of MAGs obtained
Bin.ID	Tax Identification	Domain	Phylum	Class	Order	Family	Genus	Species	Completeness	Contamination	Quality	Bin.Tool	Assembly	Study	Location
MAG1	Ornatilinea_1	Bacteria	Chloroflexota	Anaerolineae	Anaerolineales	Anaerolineaceae	Ornatilinea		76.67	6.09	Medium-Quality	CONCOCT	Co-Assembly2	Hu et al, 2016	Schrader Bluff formation Alaska
MAG2	Methanobacteriaceae_2	Archaea	Euryarchaeota	Methanobacteria	Methanobacteriales	Methanobacteriaceae	UBA419	UBA419 sp002502855	98.34	0.8	High-Quality	CONCOCT	BA-1_assembly	Sierra et al, 2020	Miranga Oil Field Brazil
MAG4	Halomonas_sp_4	Bacteria	Proteobacteria	Gammaproteobacteria	Pseudomonadales	Halomonadaceae	Halomonas	Halomonas sp001507855	99.57	0.43	High-Quality	CONCOCT	I1_assembly	Hu et al, 2016	Ivishak /Kuparuk Formation Alaska
MAG5	Alishewanella_agri_5	Bacteria	Proteobacteria	Gammaproteobacteria	Enterobacterales	Alteromonadaceae	Alishewanella	Alishewanella agri	98.19	1.18	High-Quality	CONCOCT	71551_assembly	Wang et al, 2019	Liaohe Oil Field China
MAG6	Methanobacterium_D_6	Archaea	Euryarchaeota	Methanobacteria	Methanobacteriales	Methanobacteriaceae	Methanobacterium_D		87.41	4.8	Medium-Quality	CONCOCT	DQ_assembly	Yong et al, 2016	Daqing Oil Field China
MAG7	Syntrophorhabdaceae_7	Bacteria	Desulfobacterota	Syntrophorhabdia	Syntrophorhabdales	Syntrophorhabdaceae	Delta-02	Delta-02 sp002305765	87.1	3.39	Medium-Quality	CONCOCT	Co-Assembly2	Hu et al, 2016	Schrader Bluff formation Alaska
MAG8	Microgenomatia_8	Bacteria	Patescibacteria	Microgenomatia	UBA1406	UBA1406	UBA1406		72.1	0	Medium-Quality	Vamb	BA-1_assembly	Sierra et al, 2020	Miranga Oil Field Brazil
MAG9	Methanothermobacter_thermautotrophicus_9	Archaea	Euryarchaeota	Methanobacteria	Methanobacteriales	Methanothermobacteriaceae	Methanothermobacter	Methanothermobacter thermautotrophicus	79.97	2.8	Medium-Quality	CONCOCT	DQ_assembly	Yong et al, 2016	Daqing Oil Field China
MAG10	Petrotoga_sibirica_10	Bacteria	Thermotogota	Thermotogae	Petrotogales	Petrotogaceae	Petrotoga	Petrotoga sibirica	94.36	0.16	High-Quality	CONCOCT	Co-Assembly2	Hu et al, 2016	Schrader Bluff formation Alaska
MAG11	Marinobacterium_11	Bacteria	Proteobacteria	Gammaproteobacteria	Pseudomonadales	Nitrincolaceae	Marinobacterium		98.28	0.87	High-Quality	CONCOCT	Co-Assembly1	Liu et al, 2018	Jiangsu Oil Reservoir China
MAG12	Thermovirgaceae_12	Bacteria	Synergistota	Synergistia	Synergistales	Thermovirgaceae	UBA1876	UBA1876 sp003446665	96.33	1.69	High-Quality	CONCOCT	Co-Assembly2	Hu et al, 2016	Schrader Bluff formation Alaska
MAG13	Marinobacterium_13	Bacteria	Proteobacteria	Gammaproteobacteria	Pseudomonadales	Nitrincolaceae	Marinobacterium		97.69	0.42	High-Quality	CONCOCT	Production_Well_assembly	Song et al, 2019	Shngli Oil Field China
MAG14	Ammonifexales_14	Bacteria	Firmicutes_B	Desulfotomaculia	Ammonifexales	UBA12532	UBA12532	UBA12532 sp003445475	79.79	1.49	Medium-Quality	CONCOCT	Co-Assembly1	Liu et al, 2018	Jiangsu Oil Reservoir China
MAG16	Methanothrix_A_harundinacea_D_16	Archaea	Halobacterota	Methanosarcinia	Methanotrichales	Methanotrichaceae	Methanothrix_A	Methanothrix_A harundinacea_D	98.68	0	High-Quality	Vamb	Co-Assembly2	Hu et al, 2016	Schrader Bluff formation Alaska
MAG17	Archaeoglobus_fulgidus_103	Archaea	Halobacterota	Archaeoglobi	Archaeoglobales	Archaeoglobaceae	Archaeoglobus		97.39	1.31	High-Quality	Vamb	Co-Assembly1	Liu et al, 2018	Jiangsu Oil Reservoir China
MAG18	Methanolinea_tarda_18	Archaea	Halobacterota	Methanomicrobia	Methanomicrobiales	Methanoregulaceae	Methanolinea	Methanolinea tarda	79.88	1.31	Medium-Quality	CONCOCT	BA-1_assembly	Sierra et al, 2020	Miranga Oil Field Brazil
MAG19	Methanotrichaceae_20	Archaea	Halobacterota	Methanosarcinia	Methanotrichales	Methanotrichaceae			98.31	0	High-Quality	Vamb	BA-1_assembly	Sierra et al, 2020	Miranga Oil Field Brazil
MAG20	Desulfotomaculales_21	Bacteria	Firmicutes_B	Desulfotomaculia	Desulfotomaculales	Nap2-2B	46-80	46-80 sp003485325	88.77	3.16	Medium-Quality	Vamb	Co-Assembly2	Hu et al, 2016	Schrader Bluff formation Alaska
MAG23	Methanotrichaceae_23	Archaea	Halobacterota	Methanosarcinia	Methanotrichales	Methanotrichaceae			97.71	0	High-Quality	Vamb	BA-1_assembly	Sierra et al, 2020	Miranga Oil Field Brazil
MAG24	Anaerolineaceae_24	Bacteria	Chloroflexota	Anaerolineae	Anaerolineales	Anaerolineaceae	UBA4781	UBA4781 sp003446605	88.18	4.55	Medium-Quality	Vamb	Co-Assembly2	Hu et al, 2016	Schrader Bluff formation Alaska
MAG25	Bacteroidales_25	Bacteria	Bacteroidota	Bacteroidia	Bacteroidales	DTU049	DTU049		84.48	2.75	Medium-Quality	CONCOCT	Co-Assembly2	Hu et al, 2016	Schrader Bluff formation Alaska
MAG26	Thermoplasmatota_26	Archaea	Thermoplasmatota	UBA186	UBA287	UBA287	UBA287		89.87	9.2	Medium-Quality	CONCOCT	BA-1_assembly	Sierra et al, 2020	Miranga Oil Field Brazil
MAG27	Microgenomatia_27	Bacteria	Patescibacteria	Microgenomatia	UBA1400	PJMF01			65.84	0	Medium-Quality	CONCOCT	Co-Assembly2	Hu et al, 2016	Schrader Bluff formation Alaska
MAG28	Thermovirgaceae_28	Bacteria	Synergistota	Synergistia	Synergistales	Thermovirgaceae	UBA4066	UBA4066 sp002383685	64.14	3.39	Medium-Quality	CONCOCT	Co-Assembly2	Hu et al, 2016	Schrader Bluff formation Alaska
MAG29	WOR-3_B_29	Bacteria	WOR-3_B	32-111	32-111	32-111	32-111	32-111 sp001508335	95.6	0	High-Quality	CONCOCT	Co-Assembly2	Hu et al, 2016	Schrader Bluff formation Alaska
MAG30	Tissierellaceae_30	Bacteria	Firmicutes_A	Clostridia	Tissierellales	Tissierellaceae	UBA5819		98.95	0.7	High-Quality	CONCOCT	BA-1_assembly	Sierra et al, 2020	Miranga Oil Field Brazil
MAG31	Shapirobacterales_31	Bacteria	Patescibacteria	Microgenomatia	Shapirobacterales	0-14-0-10-38-17			56.9	5.17	Medium-Quality	CONCOCT	Co-Assembly2	Hu et al, 2016	Schrader Bluff formation Alaska
MAG32	Methanothrix_A_sp_32	Archaea	Halobacterota	Methanosarcinia	Methanotrichales	Methanotrichaceae	Methanothrix_A	Methanothrix_A sp001602645	70.04	2.63	Medium-Quality	Vamb	BA-1_assembly	Sierra et al, 2020	Miranga Oil Field Brazil
MAG33	Paceibacterales_33	Bacteria	Patescibacteria	Paceibacteria	Paceibacterales	UBA5633	UBA2558		55.56	1.24	Medium-Quality	CONCOCT	Co-Assembly2	Hu et al, 2016	Schrader Bluff formation Alaska
MAG34	Anoxybacillus_gonensis_34	Bacteria	Firmicutes	Bacilli	Bacillales	Anoxybacillaceae	Anoxybacillus	Anoxybacillus gonensis	95.07	4.43	High-Quality	Vamb	DQ_assembly	Yong et al, 2016	Daqing Oil Field China
MAG36	Thermodesulfobacterium_commune_36	Bacteria	Desulfobacterota	Thermodesulfobacteria	Thermodesulfobacteriales	Thermodesulfobacteriaceae	Thermodesulfobacterium	Thermodesulfobacterium commune	64.49	1.04	Medium-Quality	Meatabat2	Co-Assembly1	Liu et al, 2018	Jiangsu Oil Reservoir China
MAG37	Thermodesulfobacterium_37	Bacteria	Desulfobacterota	Thermodesulfobacteria	Thermodesulfobacteriales	Thermodesulfobacteriaceae	Thermodesulfobacterium		97.22	4.66	High-Quality	Meatabat2	Co-Assembly1	Liu et al, 2018	Jiangsu Oil Reservoir China
MAG38	Pseudomonas_A_stutzeri_U_38	Bacteria	Proteobacteria	Gammaproteobacteria	Pseudomonadales	Pseudomonadaceae	Pseudomonas_A	Pseudomonas_A stutzeri_U	85.66	1.55	Medium-Quality	Meatabat2	Co-Assembly1	Liu et al, 2018	Jiangsu Oil Reservoir China
MAG40	Thermodesulfobacterium_commune_40	Bacteria	Desulfobacterota	Thermodesulfobacteria	Thermodesulfobacteriales	Thermodesulfobacteriaceae	Thermodesulfobacterium	Thermodesulfobacterium commune	97.5	2.5	High-Quality	MaxBin	Co-Assembly3	Hu et al, 2016	Ivishak /Kuparuk Formation Alaska
MAG41	Fervidobacterium_pennivorans_41	Bacteria	Thermotogota	Thermotogae	Thermotogales	Fervidobacteriaceae	Fervidobacterium	Fervidobacterium pennivorans	94.74	4.15	High-Quality	Meatabat2	Co-Assembly4	Wang et al, 2019	Liaohe Oil Field China
MAG42	Pseudomonas_E_mendocina_A_53	Bacteria	Proteobacteria	Gammaproteobacteria	Pseudomonadales	Pseudomonadaceae	Pseudomonas_A	Pseudomonas_A stutzeri	98.68	7.51	Medium-Quality	MaxBin	71551_assembly	Wang et al, 2019	Liaohe Oil Field China
MAG45	Shapirobacterales_45	Bacteria	Patescibacteria	Microgenomatia	Shapirobacterales	0-14-0-10-38-17			65.72	0	Medium-Quality	Binsanity	Co-Assembly2	Hu et al, 2016	Schrader Bluff formation Alaska
MAG46	Coriobacteriia_46	Bacteria	Actinobacteriota	Coriobacteriia	OPB41	UBA2279	UBA7930	UBA7930 sp003453535	92.36	1.67	High-Quality	Binsanity	Co-Assembly2	Hu et al, 2016	Schrader Bluff formation Alaska
MAG47	Methanobacterium_formicicum_47	Archaea	Euryarchaeota	Methanobacteria	Methanobacteriales	Methanobacteriaceae	Methanobacterium	Methanobacterium formicicum	96.8	1.6	High-Quality	Binsanity	Co-Assembly2	Hu et al, 2016	Schrader Bluff formation Alaska
MAG48	Dethiosulfatibacteraceae_48	Bacteria	Firmicutes_A	Clostridia	Tissierellales	Dethiosulfatibacteraceae	38-11	38-11 sp001509345	96.5	2.68	High-Quality	Binsanity	Co-Assembly2	Hu et al, 2016	Schrader Bluff formation Alaska
MAG49	Thermovirgaceae_49	Bacteria	Synergistota	Synergistia	Synergistales	Thermovirgaceae	58-81	58-81 sp001509095	96.61	1.69	High-Quality	Binsanity	Co-Assembly2	Hu et al, 2016	Schrader Bluff formation Alaska
MAG50	Methermicoccus_shengliensis_50	Archaea	Halobacterota	Methanosarcinia	Methanosarcinales	Methermicoccaceae	Methermicoccus	Methermicoccus shengliensis	100	0	High-Quality	Binsanity	Co-Assembly3	Hu et al, 2016	Ivishak /Kuparuk Formation Alaska
MAG51	Caldanaerobacter_subterraneus_51	Bacteria	Firmicutes_A	Thermoanaerobacteria	Thermoanaerobacterales	Thermoanaerobacteraceae	Caldanaerobacter	Caldanaerobacter subterraneus	86.71	1.08	Medium-Quality	Binsanity	Co-Assembly3	Hu et al, 2016	Ivishak /Kuparuk Formation Alaska
MAG52	Methanothrix_B_52	Archaea	Halobacterota	Methanosarcinia	Methanotrichales	Methanotrichaceae	Methanothrix_B		91.02	2.78	High-Quality	Binsanity	Co-Assembly4	Wang et al, 2019	Liaohe Oil Field China
MAG53	Pseudomonas_A_stutzeri_42	Bacteria	Proteobacteria	Gammaproteobacteria	Pseudomonadales	Pseudomonadaceae	Pseudomonas_E	Pseudomonas_E mendocina_A	99.2	1.59	High-Quality	Binsanity	QH_Assembly	Yong et al, 2016	Qinghai Oil Field China
MAG55	Thermodesulfovibrio_sp_55	Bacteria	Nitrospirota	Thermodesulfovibrionia	Thermodesulfovibrionales	Thermodesulfovibrionaceae	Thermodesulfovibrio	Thermodesulfovibrio sp002339325	78.17	0	Medium-Quality	Binsanity	Co-Assembly4	Wang et al, 2019	Liaohe Oil Field China
MAG56	Methanobacteriales_56	Archaea	Euryarchaeota	Methanobacteria	Methanobacteriales	UBA12515	UBA12515	UBA12515 sp001507955	100	0.8	High-Quality	CONCOCT	Co-Assembly3	Hu et al, 2016	Ivishak /Kuparuk Formation Alaska
MAG57	Methanobacteriaceae_57	Archaea	Euryarchaeota	Methanobacteria	Methanobacteriales	Methanobacteriaceae	UBA117	UBA117 sp002494785	100	0	High-Quality	CONCOCT	QH_Assembly	Yong et al, 2016	Qinghai Oil Field China
MAG58	Thermoanaerobacter_pseudethanolicus_58	Bacteria	Firmicutes_A	Thermoanaerobacteria	Thermoanaerobacterales	Thermoanaerobacteraceae	Thermoanaerobacter	Thermoanaerobacter pseudethanolicus	97.36	6.28	Medium-Quality	Binsanity	Co-Assembly3	Hu et al, 2016	Ivishak /Kuparuk Formation Alaska
MAG59	Methanothermobacter_thermautotrophicus_59	Archaea	Euryarchaeota	Methanobacteria	Methanobacteriales	Methanothermobacteriaceae	Methanothermobacter	Methanothermobacter thermautotrophicus	99.2	1.05	High-Quality	Binsanity	Co-Assembly3	Hu et al, 2016	Ivishak /Kuparuk Formation Alaska
MAG60	Halothiobacillaceae_60	Bacteria	Proteobacteria	Gammaproteobacteria	Halothiobacillales	Halothiobacillaceae	28-57-27		90.8	4.21	High-Quality	Binsanity	Co-Assembly4	Wang et al, 2019	Liaohe Oil Field China
MAG61	Ammonifexales_61	Bacteria	Firmicutes_B	Desulfotomaculia	Ammonifexales	UBA12532	UBA12532	UBA12532 sp003445475	83.61	6.39	Medium-Quality	Binsanity	Co-Assembly3	Hu et al, 2016	Ivishak /Kuparuk Formation Alaska
MAG62	Tepidimonas_taiwanensis_62	Bacteria	Proteobacteria	Gammaproteobacteria	Burkholderiales	Burkholderiaceae	Tepidimonas	Tepidimonas taiwanensis	90.86	6.02	Medium-Quality	CONCOCT	Co-Assembly4	Wang et al, 2019	Liaohe Oil Field China
MAG66	Methanothrix_B_thermoacetophila_66	Archaea	Halobacterota	Methanosarcinia	Methanotrichales	Methanotrichaceae	Methanothrix_B	Methanothrix_B thermoacetophila	54.66	0.22	Medium-Quality	Binsanity	Co-Assembly1	Liu et al, 2018	Jiangsu Oil Reservoir China
MAG67	Thermoanaerobacter_pseudethanolicus_67	Bacteria	Firmicutes_A	Thermoanaerobacteria	Thermoanaerobacterales	Thermoanaerobacteraceae	Thermoanaerobacter	Thermoanaerobacter pseudethanolicus	99.04	0	High-Quality	MaxBin	I1_assembly	Hu et al, 2016	Ivishak /Kuparuk Formation Alaska
MAG68	Pseudomonas_A_balearica_68	Bacteria	Proteobacteria	Gammaproteobacteria	Pseudomonadales	Pseudomonadaceae	Pseudomonas_A	Pseudomonas_A balearica	88.36	2.36	Medium-Quality	MaxBin	Production_Well_assembly	Song et al, 2019	Shngli Oil Field China
MAG69	Methanolobus_sp_69	Archaea	Halobacterota	Methanosarcinia	Methanosarcinales	Methanosarcinaceae	Methanolobus	Methanolobus sp002508635	99.48	3.01	High-Quality	MaxBin	71551_assembly	Wang et al, 2019	Liaohe Oil Field China
MAG70	Thermovirga_lienii_70	Bacteria	Synergistota	Synergistia	Synergistales	Thermovirgaceae	Thermovirga	Thermovirga lienii	55.93	0	Medium-Quality	MaxBin	Co-Assembly3	Hu et al, 2016	Ivishak /Kuparuk Formation Alaska
MAG71	Dysgonomonadaceae_71	Bacteria	Bacteroidota	Bacteroidia	Bacteroidales	Dysgonomonadaceae	UBA4179		59.45	6.41	Medium-Quality	MaxBin	DQ_assembly	Yong et al, 2016	Daqing Oil Field China
MAG72	Sulfurospirillaceae_72	Bacteria	Campylobacterota	Campylobacteria	Campylobacterales	Sulfurospirillaceae	UBA1877	UBA1877 sp002352945	91.94	3.61	High-Quality	MaxBin	QH_Assembly	Yong et al, 2016	Qinghai Oil Field China
MAG73	Calditerrivibrionaceae_73	Bacteria	Deferribacterota	Deferribacteres	Deferribacterales	Calditerrivibrionaceae			87.14	2.8	Medium-Quality	MaxBin	DQ_assembly	Yong et al, 2016	Daqing Oil Field China
MAG74	Methermicoccus_shengliensis_74	Archaea	Halobacterota	Methanosarcinia	Methanosarcinales	Methermicoccaceae	Methermicoccus	Methermicoccus shengliensis	99.78	0	High-Quality	MaxBin	QH_Assembly	Yong et al, 2016	Qinghai Oil Field China
MAG78	Dethiosulfatibacteraceae_78	Bacteria	Firmicutes_A	Clostridia	Tissierellales	Dethiosulfatibacteraceae	UBA8670	UBA8670 sp003539375	83.15	4.53	Medium-Quality	MaxBin	QH_Assembly	Yong et al, 2016	Qinghai Oil Field China
MAG79	Marinobacter_79	Bacteria	Proteobacteria	Gammaproteobacteria	Pseudomonadales	Oleiphilaceae	Marinobacter		78.17	2.82	Medium-Quality	MaxBin	QH_Assembly	Yong et al, 2016	Qinghai Oil Field China
MAG80	Kosmotoga_80	Bacteria	Thermotogota	Thermotogae	Petrotogales	Kosmotogaceae	Kosmotoga		60.42	6.03	Medium-Quality	MaxBin	Co-Assembly3	Hu et al, 2016	Ivishak /Kuparuk Formation Alaska
MAG81	Marinisomatota_81	Bacteria	Marinisomatota	AB16	AB16	46-47	46-47	46-47 sp001509335	97.8	2.56	High-Quality	MaxBin	Co-Assembly2	Hu et al, 2016	Schrader Bluff formation Alaska
MAG82	Ignavibacteria_82	Bacteria	Bacteroidota	Ignavibacteria					56.59	3.06	Medium-Quality	MaxBin	Co-Assembly4	Wang et al, 2019	Liaohe Oil Field China
MAG84	Woesearchaeales_84	Archaea	Nanoarchaeota	Nanoarchaeia	Woesearchaeales	UBA119	UBA119	UBA119 sp002505945	72.2	2.34	Medium-Quality	MaxBin	QH_Assembly	Yong et al, 2016	Qinghai Oil Field China
MAG86	Alkalibacteraceae_86	Bacteria	Firmicutes_A	Clostridia	Eubacteriales	Alkalibacteraceae			81.34	1.21	Medium-Quality	MaxBin	QH_Assembly	Yong et al, 2016	Qinghai Oil Field China
MAG87	Pseudothermotoga_A_sp_87	Bacteria	Thermotogota	Thermotogae	Thermotogales	Thermotogaceae	Pseudothermotoga_A	Pseudothermotoga_A sp003510135	98.28	3.45	High-Quality	MaxBin	Co-Assembly3	Hu et al, 2016	Ivishak /Kuparuk Formation Alaska
MAG88	Bacteroidales_88	Bacteria	Bacteroidota	Bacteroidia	Bacteroidales	GWA2-32-17			85.49	2.42	Medium-Quality	MaxBin	Co-Assembly4	Wang et al, 2019	Liaohe Oil Field China
MAG89	Tepidiphilus_sp_167	Bacteria	Proteobacteria	Gammaproteobacteria	Burkholderiales	Burkholderiaceae	Tepidimonas		83.59	3.29	Medium-Quality	MaxBin	Co-Assembly4	Wang et al, 2019	Liaohe Oil Field China
MAG90	Moorellia_90	Bacteria	Firmicutes_B	Moorellia	DTU086	DTU086	41-269	41-269 sp001508005	97.24	0.34	High-Quality	MaxBin	Co-Assembly3	Hu et al, 2016	Ivishak /Kuparuk Formation Alaska
MAG91	Archaeoglobaceae_91	Archaea	Halobacterota	Archaeoglobi	Archaeoglobales	Archaeoglobaceae			89.22	2.29	Medium-Quality	MaxBin	Co-Assembly4	Wang et al, 2019	Liaohe Oil Field China
MAG93	Methanocalculus_93	Archaea	Halobacterota	Methanomicrobia	Methanomicrobiales	Methanocorpusculaceae	Methanocalculus		82.47	6.86	Medium-Quality	MaxBin	Co-Assembly2	Hu et al, 2016	Schrader Bluff formation Alaska
MAG94	Flexistipes_sp_163	Bacteria	Deferribacterota	Deferribacteres	Deferribacterales	Flexistipitaceae	Flexistipes	Flexistipes sinusarabici	78.37	1.72	Medium-Quality	MaxBin	QH_Assembly	Yong et al, 2016	Qinghai Oil Field China
MAG95	Coprothermobacteraceae_95	Bacteria	Coprothermobacterota	Coprothermobacteria	Coprothermobacterales	Coprothermobacteraceae			60.39	5.36	Medium-Quality	MaxBin	Co-Assembly4	Wang et al, 2019	Liaohe Oil Field China
MAG98	Carboxydocellales_98	Bacteria	Firmicutes_B	Thermincolia_A	Carboxydocellales				85.12	2.23	Medium-Quality	MaxBin	Co-Assembly4	Wang et al, 2019	Liaohe Oil Field China
MAG99	Pseudomonas_aeruginosa_99	Bacteria	Proteobacteria	Gammaproteobacteria	Pseudomonadales	Pseudomonadaceae	Pseudomonas	Pseudomonas aeruginosa	99.35	3.63	High-Quality	MaxBin	Co-Assembly4	Wang et al, 2019	Liaohe Oil Field China
MAG100	Pseudomonas_A_stutzeri_100	Bacteria	Proteobacteria	Gammaproteobacteria	Pseudomonadales	Pseudomonadaceae	Pseudomonas_A	Pseudomonas_A stutzeri	91.47	3.26	High-Quality	MaxBin	Co-Assembly4	Wang et al, 2019	Liaohe Oil Field China
MAG102	Desulfonauticus_sp_102	Bacteria	Desulfobacterota_A	Desulfovibrionia	Desulfovibrionales	Desulfonauticaceae	Desulfonauticus	Desulfonauticus sp001507915	99.4	5.36	Medium-Quality	MaxBin	Co-Assembly3	Hu et al, 2016	Ivishak /Kuparuk Formation Alaska
MAG103	Archaeoglobus_17	Archaea	Halobacterota	Archaeoglobi	Archaeoglobales	Archaeoglobaceae	Archaeoglobus	Archaeoglobus fulgidus	99.35	1.31	High-Quality	MaxBin	Co-Assembly3	Hu et al, 2016	Ivishak /Kuparuk Formation Alaska
MAG104	Mesotoga_sp_104	Bacteria	Thermotogota	Thermotogae	Petrotogales	Kosmotogaceae	Mesotoga	Mesotoga sp002752635	93.73	4.62	High-Quality	Meatabat2	Co-Assembly2	Hu et al, 2016	Schrader Bluff formation Alaska
MAG105	Synergistales_105	Bacteria	Synergistota	Synergistia	Synergistales	54-24	54-24		91.53	0.15	High-Quality	Meatabat2	BA-1_assembly	Sierra et al, 2020	Miranga Oil Field Brazil
MAG106	Methanoculleus_marisnigri_B_106	Archaea	Halobacterota	Methanomicrobia	Methanomicrobiales	Methanocullaceae	Methanoculleus	Methanoculleus marisnigri_B	95.95	1.74	High-Quality	Meatabat2	Co-Assembly2	Hu et al, 2016	Schrader Bluff formation Alaska
MAG107	Caldatribacteriota_107	Bacteria	Caldatribacteriota	JS1	SB-45	34-128	UBA9904	UBA9904 sp003513845	92.76	6.01	Medium-Quality	Meatabat2	BA-1_assembly	Sierra et al, 2020	Miranga Oil Field Brazil
MAG108	Methanoculleus_sp_108	Archaea	Halobacterota	Methanomicrobia	Methanomicrobiales	Methanocullaceae	Methanoculleus	Methanoculleus sp002497965	94.77	3.62	High-Quality	Meatabat2	Co-Assembly2	Hu et al, 2016	Schrader Bluff formation Alaska
MAG109	Thermoplasmatota_109	Archaea	Thermoplasmatota	UBA186	UBA287	UBA287	UBA287		91.57	2.4	High-Quality	Meatabat2	BA-1_assembly	Sierra et al, 2020	Miranga Oil Field Brazil
MAG110	Desulfotomaculales_110	Bacteria	Firmicutes_B	Desulfotomaculia	Desulfotomaculales	Nap2-2B	SCADC1-2-3	SCADC1-2-3 sp003445555	76.5	1.34	Medium-Quality	Meatabat2	Co-Assembly2	Hu et al, 2016	Schrader Bluff formation Alaska
MAG111	Thermovirgaceae_111	Bacteria	Synergistota	Synergistia	Synergistales	Thermovirgaceae	UBA1876		54.55	3.39	Medium-Quality	Meatabat2	BA-1_assembly	Sierra et al, 2020	Miranga Oil Field Brazil
MAG112	Dojkabacteria_112	Bacteria	Patescibacteria	Dojkabacteria	SC72	SC72	UBA9296		79	1.72	Medium-Quality	Meatabat2	Co-Assembly2	Hu et al, 2016	Schrader Bluff formation Alaska
MAG113	Arcobacteraceae_113	Bacteria	Campylobacterota	Campylobacteria	Campylobacterales	Arcobacteraceae	UBA6211		99.59	0.61	High-Quality	Meatabat2	Production_Well_assembly	Song et al, 2019	Shngli Oil Field China
MAG114	Microgenomatia_114	Bacteria	Patescibacteria	Microgenomatia	UBA1400	PJMF01			61.89	0.08	Medium-Quality	Meatabat2	Co-Assembly2	Hu et al, 2016	Schrader Bluff formation Alaska
MAG115	Smithellaceae_115	Bacteria	Desulfobacterota	Syntrophia	Syntrophales	Smithellaceae	UBA8904	UBA8904 sp003506745	89.68	1.65	Medium-Quality	Meatabat2	Co-Assembly2	Hu et al, 2016	Schrader Bluff formation Alaska
MAG116	Lactobacillus_G_ozensis_116	Bacteria	Firmicutes	Bacilli	Lactobacillales	Lactobacillaceae	Lactobacillus_G	Lactobacillus_G ozensis	86.89	1.81	Medium-Quality	Meatabat2	71551_assembly	Wang et al, 2019	Liaohe Oil Field China
MAG118	Sulfurimonas_sp_118	Bacteria	Campylobacterota	Campylobacteria	Campylobacterales	Sulfurimonadaceae	Sulfurimonas	Sulfurimonas sp002452895	99.59	1.43	High-Quality	Meatabat2	Co-Assembly1	Liu et al, 2018	Jiangsu Oil Reservoir China
MAG119	Anaerolineaceae_119	Bacteria	Chloroflexota	Anaerolineae	Anaerolineales	Anaerolineaceae	49-20	49-20 sp003445715	68.18	5.64	Medium-Quality	Meatabat2	Co-Assembly2	Hu et al, 2016	Schrader Bluff formation Alaska
MAG120	Caldatribacteriota_120	Bacteria	Caldatribacteriota	JS1	SB-45	UBA6794	UBA6794	UBA6794 sp002452835	78.89	0	Medium-Quality	Meatabat2	Co-Assembly2	Hu et al, 2016	Schrader Bluff formation Alaska
MAG121	Methanothrix_B_thermoacetophila_121	Archaea	Halobacterota	Methanosarcinia	Methanotrichales	Methanotrichaceae	Methanothrix_B	Methanothrix_B thermoacetophila	97.36	3.92	High-Quality	Meatabat2	BA-1_assembly	Sierra et al, 2020	Miranga Oil Field Brazil
MAG122	Caldatribacteriota_122	Bacteria	Caldatribacteriota	JS1	SB-45	UBA6794			98.31	0	High-Quality	Meatabat2	Co-Assembly2	Hu et al, 2016	Schrader Bluff formation Alaska
MAG124	Dojkabacteria_124	Bacteria	Patescibacteria	Dojkabacteria	SC72	SC72	UBA2177		70.38	3.79	Medium-Quality	Meatabat2	Co-Assembly2	Hu et al, 2016	Schrader Bluff formation Alaska
MAG125	Caldatribacteriota_125	Bacteria	Caldatribacteriota	JS1	SB-45	34-128	34-128	34-128 sp003451675	96.61	0	High-Quality	Meatabat2	Co-Assembly2	Hu et al, 2016	Schrader Bluff formation Alaska
MAG126	Caldatribacteriota_126	Bacteria	Caldatribacteriota	JS1	SB-45	UBA6794	UBA6794		69.49	1.69	Medium-Quality	Meatabat2	Co-Assembly2	Hu et al, 2016	Schrader Bluff formation Alaska
MAG127	Methanomethylophilaceae_127	Archaea	Thermoplasmatota	Thermoplasmata	Methanomassiliicoccales	Methanomethylophilaceae	UBA9915	UBA9915 sp9915u	94.73	1.61	High-Quality	Meatabat2	Co-Assembly2	Hu et al, 2016	Schrader Bluff formation Alaska
MAG128	Desulfotomaculales_128	Bacteria	Firmicutes_B	Desulfotomaculia	Desulfotomaculales	Nap2-2B	46-80	46-80 sp003513005	91.46	0	High-Quality	Meatabat2	Co-Assembly2	Hu et al, 2016	Schrader Bluff formation Alaska
MAG129	Pseudomonas_A_stutzeri_129	Bacteria	Proteobacteria	Gammaproteobacteria	Pseudomonadales	Pseudomonadaceae	Pseudomonas_A	Pseudomonas_A stutzeri	96.7	3.59	High-Quality	Meatabat2	Co-Assembly1	Liu et al, 2018	Jiangsu Oil Reservoir China
MAG130	Archaeoglobaceae_130	Archaea	Halobacterota	Archaeoglobi	Archaeoglobales	Archaeoglobaceae			86.6	2.29	Medium-Quality	Meatabat2	Co-Assembly1	Liu et al, 2018	Jiangsu Oil Reservoir China
MAG131	Mesotoga_infera_A_131	Bacteria	Thermotogota	Thermotogae	Petrotogales	Kosmotogaceae	Mesotoga	Mesotoga infera_A	92.08	0	High-Quality	Meatabat2	Co-Assembly2	Hu et al, 2016	Schrader Bluff formation Alaska
MAG133	Thermacetogeniales_133	Bacteria	Firmicutes_B	Syntrophomonadia	Thermacetogeniales	50-218	50-218		90.14	0	High-Quality	Meatabat2	Co-Assembly1	Liu et al, 2018	Jiangsu Oil Reservoir China
MAG135	Methanocalculus_sp_135	Archaea	Halobacterota	Methanomicrobia	Methanomicrobiales	Methanocorpusculaceae	Methanocalculus	Methanocalculus sp9912u	93.99	0	High-Quality	Meatabat2	Co-Assembly2	Hu et al, 2016	Schrader Bluff formation Alaska
MAG136	Halobacterota_136	Archaea	Halobacterota	NRA6	NRA6	NRA6	UBA10521		86.25	3.92	Medium-Quality	Meatabat2	BA-1_assembly	Sierra et al, 2020	Miranga Oil Field Brazil
MAG137	Kosmotogaceae_137	Bacteria	Thermotogota	Thermotogae	Petrotogales	Kosmotogaceae	UBA9910	UBA9910 sp003444085	97.41	0	High-Quality	Meatabat2	Co-Assembly2	Hu et al, 2016	Schrader Bluff formation Alaska
MAG138	Halobacterota_138	Archaea	Halobacterota	NRA6	NRA6	NRA6	UBA10521	UBA10521 sp8915u	85.92	8.17	Medium-Quality	Meatabat2	BA-1_assembly	Sierra et al, 2020	Miranga Oil Field Brazil
MAG139	Bacteroidales_139	Bacteria	Bacteroidota	Bacteroidia	Bacteroidales	TTA-H9	TTA-H9	TTA-H9 sp002418865	94.62	3.23	High-Quality	Meatabat2	Co-Assembly2	Hu et al, 2016	Schrader Bluff formation Alaska
MAG140	Halobacterota_140	Archaea	Halobacterota	NRA6	NRA6	NRA6	UBA10521		82.98	0.65	Medium-Quality	Meatabat2	BA-1_assembly	Sierra et al, 2020	Miranga Oil Field Brazil
MAG141	Caldatribacteriota_141	Bacteria	Caldatribacteriota	JS1	SB-45	34-128	UBA9904	UBA9904 sp003513845	94.92	0	High-Quality	Meatabat2	Co-Assembly2	Hu et al, 2016	Schrader Bluff formation Alaska
MAG142	Acinetobacter_guillouiae_142	Bacteria	Proteobacteria	Gammaproteobacteria	Pseudomonadales	Moraxellaceae	Acinetobacter	Acinetobacter guillouiae	94.41	2.59	High-Quality	Meatabat2	Co-Assembly1	Liu et al, 2018	Jiangsu Oil Reservoir China
MAG143	Methanothrix_B_thermoacetophila_143	Archaea	Halobacterota	Methanosarcinia	Methanotrichales	Methanotrichaceae	Methanothrix_B	Methanothrix_B thermoacetophila	96.08	0.65	High-Quality	Meatabat2	DQ_assembly	Yong et al, 2016	Daqing Oil Field China
MAG144	Thermovirgaceae_144	Bacteria	Synergistota	Synergistia	Synergistales	Thermovirgaceae	UBA1876	UBA1876 sp003446665	89.83	0.68	Medium-Quality	Meatabat2	QH_Assembly	Yong et al, 2016	Qinghai Oil Field China
MAG145	Pseudothermotoga_B_145	Bacteria	Thermotogota	Thermotogae	Thermotogales	Thermotogaceae	Pseudothermotoga_B		68.35	3.45	Medium-Quality	Meatabat2	Co-Assembly3	Hu et al, 2016	Ivishak /Kuparuk Formation Alaska
MAG146	Geoalkalibacter_A_146	Bacteria	Desulfuromonadota	Desulfuromonadia	Desulfuromonadales	Geoalkalibacteraceae	Geoalkalibacter_A		50.77	0.67	Medium-Quality	Meatabat2	QH_Assembly	Yong et al, 2016	Qinghai Oil Field China
MAG147	Azovibrio_147	Bacteria	Proteobacteria	Gammaproteobacteria	Burkholderiales	Rhodocyclaceae	Azovibrio		92.96	0.5	High-Quality	Meatabat2	Co-Assembly4	Wang et al, 2019	Liaohe Oil Field China
MAG148	Synergistales_148	Bacteria	Synergistota	Synergistia	Synergistales	54-24	54-24	54-24 sp001508935	96.61	2.26	High-Quality	Meatabat2	Co-Assembly3	Hu et al, 2016	Ivishak /Kuparuk Formation Alaska
MAG149	Patescibacteria_149	Bacteria	Patescibacteria	CPR2	UBA1875	UBA1875	UBA1875	UBA1875 sp002338125	71.76	2.22	Medium-Quality	Meatabat2	QH_Assembly	Yong et al, 2016	Qinghai Oil Field China
MAG150	Thermococcus_A_sp_150	Archaea	Euryarchaeota	Thermococci	Thermococcales	Thermococcaceae	Thermococcus_A	Thermococcus_A sp000430485	94.22	5.65	Medium-Quality	Meatabat2	Co-Assembly3	Hu et al, 2016	Ivishak /Kuparuk Formation Alaska
MAG151	Thermacetogeniales_151	Bacteria	Firmicutes_B	Syntrophomonadia	Thermacetogeniales	50-218	50-218	50-218 sp001508855	95.68	2.53	High-Quality	Meatabat2	Co-Assembly3	Hu et al, 2016	Ivishak /Kuparuk Formation Alaska
MAG154	Thermodesulfovibrio_154	Bacteria	Nitrospirota	Thermodesulfovibrionia	Thermodesulfovibrionales	Thermodesulfovibrionaceae	Thermodesulfovibrio		90.03	7.33	Medium-Quality	Meatabat2	Co-Assembly4	Wang et al, 2019	Liaohe Oil Field China
MAG155	Cloacimonadales_155	Bacteria	Cloacimonadota	Cloacimonadia	Cloacimonadales	TCS61			75.38	1.2	Medium-Quality	Meatabat2	QH_Assembly	Yong et al, 2016	Qinghai Oil Field China
MAG156	Moorellaceae_156	Bacteria	Firmicutes_B	Moorellia	Moorellales	Moorellaceae	UBA12545	UBA12545 sp003509545	97.72	1.38	High-Quality	Meatabat2	Co-Assembly3	Hu et al, 2016	Ivishak /Kuparuk Formation Alaska
MAG157	Methanothermococcus_thermolithotrophicus_157	Archaea	Euryarchaeota	Methanococci	Methanococcales	Methanococcaceae	Methanothermococcus	Methanothermococcus thermolithotrophicus	99.29	0.48	High-Quality	Meatabat2	QH_Assembly	Yong et al, 2016	Qinghai Oil Field China
MAG158	Thauera_propionica_158	Bacteria	Proteobacteria	Gammaproteobacteria	Burkholderiales	Rhodocyclaceae	Thauera	Thauera propionica	99.9	0.27	High-Quality	Meatabat2	Co-Assembly4	Wang et al, 2019	Liaohe Oil Field China
MAG159	Thermodesulforhabdaceae_159	Bacteria	Desulfobacterota	Syntrophobacteria	Syntrophobacterales	Thermodesulforhabdaceae			94.03	0.65	High-Quality	Meatabat2	Co-Assembly4	Wang et al, 2019	Liaohe Oil Field China
MAG160	Calditerrivibrio_160	Bacteria	Deferribacterota	Deferribacteres	Deferribacterales	Calditerrivibrionaceae	Calditerrivibrio		86.57	3.51	Medium-Quality	Meatabat2	Co-Assembly4	Wang et al, 2019	Liaohe Oil Field China
MAG161	Bipolaricaulaceae_161	Bacteria	Bipolaricaulota	Bipolaricaulia	Bipolaricaulales	Bipolaricaulaceae	64-32	64-32 sp001508155	89.83	0.15	Medium-Quality	Meatabat2	Co-Assembly3	Hu et al, 2016	Ivishak /Kuparuk Formation Alaska
MAG162	Acetomicrobium_162	Bacteria	Synergistota	Synergistia	Synergistales	Acetomicrobiaceae	Acetomicrobium		93.07	5.08	Medium-Quality	Meatabat2	Co-Assembly3	Hu et al, 2016	Ivishak /Kuparuk Formation Alaska
MAG163	Flexistipes_sinusarabici_94	Bacteria	Deferribacterota	Deferribacteres	Deferribacterales	Flexistipitaceae	Flexistipes	Flexistipes sp002338145	98.22	3.88	High-Quality	Meatabat2	QH_Assembly	Yong et al, 2016	Qinghai Oil Field China
MAG164	Thermotoga_petrophila_164	Bacteria	Thermotogota	Thermotogae	Thermotogales	Thermotogaceae	Thermotoga	Thermotoga petrophila	94.64	1.96	High-Quality	Meatabat2	Co-Assembly3	Hu et al, 2016	Ivishak /Kuparuk Formation Alaska
MAG166	Caldicellulosiruptor_lactoaceticus_165	Bacteria	Firmicutes_A	Thermoanaerobacteria	Caldicellulosiruptorales	Caldicellulosiruptoraceae	Caldicellulosiruptor	Caldicellulosiruptor lactoaceticus	97.64	1.06	High-Quality	CONCOCT	Co-Assembly4	Wang et al, 2019	Liaohe Oil Field China
MAG167	Tepidimonas_89	Bacteria	Proteobacteria	Gammaproteobacteria	Burkholderiales	Rhodocyclaceae	Tepidiphilus	Tepidiphilus sp003545175	91.11	1.93	High-Quality	CONCOCT	Co-Assembly4	Wang et al, 2019	Liaohe Oil Field China
MAG168	Fervidobacterium_nodosum_168	Bacteria	Thermotogota	Thermotogae	Thermotogales	Fervidobacteriaceae	Fervidobacterium	Fervidobacterium nodosum	88.95	0	Medium-Quality	CONCOCT	Co-Assembly4	Wang et al, 2019	Liaohe Oil Field China
MAG169	Sulfurihydrogenibium_azorense_169	Bacteria	Aquificota	Aquificae	Hydrogenothermales	Hydrogenothermaceae	Sulfurihydrogenibium	Sulfurihydrogenibium azorense	97.43	0.41	High-Quality	CONCOCT	Co-Assembly4	Wang et al, 2019	Liaohe Oil Field China
MAG170	Thermodesulfovibrio_aggregans_170	Bacteria	Nitrospirota	Thermodesulfovibrionia	Thermodesulfovibrionales	Thermodesulfovibrionaceae	Thermodesulfovibrio	Thermodesulfovibrio aggregans	96.36	1.82	High-Quality	CONCOCT	Co-Assembly4	Wang et al, 2019	Liaohe Oil Field China
MAG171	Elusimicrobiales_171	Bacteria	Elusimicrobiota	Elusimicrobia	Elusimicrobiales	UBA9959	0-14-0-20-51-18		89.89	0	Medium-Quality	CONCOCT	Co-Assembly4	Wang et al, 2019	Liaohe Oil Field China
MAG172	Thermodesulfobacterium_commune_172	Bacteria	Desulfobacterota	Thermodesulfobacteria	Thermodesulfobacteriales	Thermodesulfobacteriaceae	Thermodesulfobacterium	Thermodesulfobacterium commune	92.22	0.25	High-Quality	CONCOCT	Co-Assembly4	Wang et al, 2019	Liaohe Oil Field China
MAG173	Thermococcus_A_sibiricus_173	Archaea	Euryarchaeota	Thermococci	Thermococcales	Thermococcaceae	Thermococcus_A	Thermococcus_A sibiricus	97.03	1.49	High-Quality	Vamb	Co-Assembly3	Hu et al, 2016	Ivishak /Kuparuk Formation Alaska
MAG174	Moorellia_174	Bacteria	Firmicutes_B	Moorellia	UBA1874	UBA1874	UBA1874	UBA1874 sp002352935	85.66	0.51	Medium-Quality	Vamb	QH_Assembly	Yong et al, 2016	Qinghai Oil Field China
MAG175	Methanothrix_B_thermoacetophila_175	Archaea	Halobacterota	Methanosarcinia	Methanotrichales	Methanotrichaceae	Methanothrix_B	Methanothrix_B thermoacetophila	82.83	9.67	Medium-Quality	Vamb	Co-Assembly4	Wang et al, 2019	Liaohe Oil Field China
MAG176	Hydrothermia_176	Bacteria	WOR-3_A	Hydrothermia	UBA1063	UBA1063			88.14	0	Medium-Quality	Vamb	Co-Assembly4	Wang et al, 2019	Liaohe Oil Field China
